# Supplementary material for: Evaluation of a Wearable Non-Invasive Thermometer for Monitoring Ear Canal Temperature during Physically Demanding (Outdoor) Work
Source: Int J Environ Res Public Health. 2021 May 4;18(9):4896. doi: 10.3390/ijerph18094896 (PMC8125248; doi:10.3390/ijerph18094896)
Supplement: Supplementary file 1 [file ijerph-18-04896-s001.zip]

Archive with 12 entries (10 files):
- Supporting Information files/Field study/
- Supporting Information files/Field study/Field study - in vivo validation - Bland-Altman plots.xlsx
- Supporting Information files/Field study/Field study - in vivo validation - data subjects RAW.xlsx
- Supporting Information files/Field study/Field study - monitoring - data subjects RAW.xlsx
- Supporting Information files/Field study/Test protocol - part III Field study.pdf
- Supporting Information files/Lab study/
- Supporting Information files/Lab study/Lab study - in vivo validation - Bland-Altman plots.xlsx
- Supporting Information files/Lab study/Lab study - in vivo validation - data subjects RAW.xlsx
- Supporting Information files/Lab study/Lab study - validation - Bland-Altmann plots.xlsx
- Supporting Information files/Lab study/Lab study - validation - thermostatic water bath RAW.xlsx
- Supporting Information files/Lab study/Test protocol - part I Lab study.pdf
- Supporting Information files/Lab study/Test protocol - part II Lab study.pdf
