# Supplementary material for: Evaluation of a Wearable Non-Invasive Thermometer for Monitoring Ear Canal Temperature during Physically Demanding (Outdoor) Work
Source: Int J Environ Res Public Health. 2021 May 4;18(9):4896. doi: 10.3390/ijerph18094896 (PMC8125248; doi:10.3390/ijerph18094896)
Supplement: Supplementary file 1 [file ijerph-18-04896-s001.zip › Supporting Information files/Field study/Field study - in vivo validation - Bland-Altman plots.xlsx]

## Sheet: Lab Cosinuss calibrated before
Mean temperature	Difference Cosinuss versus tympanic IR	Mean difference	LoA +	LoA -	zero-line	LoA
36.8	-0.2	0.22449	0.65449	-0.20551	0	0.43
36.05	-0.3	0.22449	0.65449	-0.20551	0
36.55	0.1	0.22449	0.65449	-0.20551	0
36.95	0.5	0.22449	0.65449	-0.20551	0
35.7	0	0.22449	0.65449	-0.20551	0
36.8	0.2	0.22449	0.65449	-0.20551	0
36.7	0	0.22449	0.65449	-0.20551	0
36.75	0.1	0.22449	0.65449	-0.20551	0
36.6	0.2	0.22449	0.65449	-0.20551	0
36.45	0.3	0.22449	0.65449	-0.20551	0
36.6	0.2	0.22449	0.65449	-0.20551	0
37	0	0.22449	0.65449	-0.20551	0
36.9	0.4	0.22449	0.65449	-0.20551	0
36.25	0.3	0.22449	0.65449	-0.20551	0
35.5	0.2	0.22449	0.65449	-0.20551	0
36	0	0.22449	0.65449	-0.20551	0
36.85	0.5	0.22449	0.65449	-0.20551	0
36.45	0.3	0.22449	0.65449	-0.20551	0
37.15	0.1	0.22449	0.65449	-0.20551	0
36.3	0.2	0.22449	0.65449	-0.20551	0
36.55	0.3	0.22449	0.65449	-0.20551	0
36.95	0.5	0.22449	0.65449	-0.20551	0
36.4	0.4	0.22449	0.65449	-0.20551	0
36.85	0.5	0.22449	0.65449	-0.20551	0
37.15	0.3	0.22449	0.65449	-0.20551	0
37	0.4	0.22449	0.65449	-0.20551	0
37.1	0.2	0.22449	0.65449	-0.20551	0
36.6	0.4	0.22449	0.65449	-0.20551	0
36.95	0.1	0.22449	0.65449	-0.20551	0
36.65	0.3	0.22449	0.65449	-0.20551	0
36.6	0.2	0.22449	0.65449	-0.20551	0
36.65	0.3	0.22449	0.65449	-0.20551	0
37.15	0.7	0.22449	0.65449	-0.20551	0
36.75	0.1	0.22449	0.65449	-0.20551	0
36.8	0.4	0.22449	0.65449	-0.20551	0
37	0	0.22449	0.65449	-0.20551	0
36.45	0.7	0.22449	0.65449	-0.20551	0
36.1	0.4	0.22449	0.65449	-0.20551	0
36.75	0.5	0.22449	0.65449	-0.20551	0
36.15	0.3	0.22449	0.65449	-0.20551	0
36.2	0	0.22449	0.65449	-0.20551	0
35.65	0.3	0.22449	0.65449	-0.20551	0
36.25	0.3	0.22449	0.65449	-0.20551	0
35.5	0	0.22449	0.65449	-0.20551	0
36.55	0.1	0.22449	0.65449	-0.20551	0
36.5	0	0.22449	0.65449	-0.20551	0
36.2	0.4	0.22449	0.65449	-0.20551	0
36.65	0.1	0.22449	0.65449	-0.20551	0
36.15	-0.3	0.22449	0.65449	-0.20551	0

## Sheet: Lab Cosinuss calibrated after
Mean temperature	Difference Cosinuss versus tympanic IR	Mean difference	LoA +	LoA -	zero-line	LoA
36.35	-0.1	0.238636	2.13864	-1.66136	0	1.9
36.15	-0.9	0.238636	2.13864	-1.66136	0
36.5	0.2	0.238636	2.13864	-1.66136	0
36.2	0	0.238636	2.13864	-1.66136	0
35.15	-0.3	0.238636	2.13864	-1.66136	0
36.15	-0.3	0.238636	2.13864	-1.66136	0
36.75	0.1	0.238636	2.13864	-1.66136	0
36	-1	0.238636	2.13864	-1.66136	0
36.45	-0.1	0.238636	2.13864	-1.66136	0
36.5	-0.2	0.238636	2.13864	-1.66136	0
35.95	-0.9	0.238636	2.13864	-1.66136	0
37.3	0.2	0.238636	2.13864	-1.66136	0
36.85	0.5	0.238636	2.13864	-1.66136	0
36.45	0.5	0.238636	2.13864	-1.66136	0
36.15	-0.3	0.238636	2.13864	-1.66136	0
36.3	0.2	0.238636	2.13864	-1.66136	0
37.8	0.8	0.238636	2.13864	-1.66136	0
37.45	1.1	0.238636	2.13864	-1.66136	0
		0.238636	2.13864	-1.66136	0
36.55	-0.7	0.238636	2.13864	-1.66136	0
37.4	1.2	0.238636	2.13864	-1.66136	0
36.75	-0.3	0.238636	2.13864	-1.66136	0
37.85	2.3	0.238636	2.13864	-1.66136	0
37.4	1	0.238636	2.13864	-1.66136	0
37.45	0.1	0.238636	2.13864	-1.66136	0
38.7	0.8	0.238636	2.13864	-1.66136	0
38.65	0.9	0.238636	2.13864	-1.66136	0
37.55	-0.9	0.238636	2.13864	-1.66136	0
37.58	0.7	0.238636	2.13864	-1.66136	0
38.8	2.4	0.238636	2.13864	-1.66136	0
36.65	0.1	0.238636	2.13864	-1.66136	0
37.95	1.7	0.238636	2.13864	-1.66136	0
38.4	2	0.238636	2.13864	-1.66136	0
37	-0.2	0.238636	2.13864	-1.66136	0
37.35	0.9	0.238636	2.13864	-1.66136	0
		0.238636	2.13864	-1.66136	0
		0.238636	2.13864	-1.66136	0
35.5	-1	0.238636	2.13864	-1.66136	0
36.1	-0.8	0.238636	2.13864	-1.66136	0
35.6	-1	0.238636	2.13864	-1.66136	0
37.25	2.3	0.238636	2.13864	-1.66136	0
35.8	0.8	0.238636	2.13864	-1.66136	0
36.65	1.1	0.238636	2.13864	-1.66136	0
35.9	-0.2	0.238636	2.13864	-1.66136	0
35.9	-0.2	0.238636	2.13864	-1.66136	0
35.55	-1.7	0.238636	2.13864	-1.66136	0
		0.238636	2.13864	-1.66136	0
		0.238636	2.13864	-1.66136	0
36.25	-0.3	0.238636	2.13864	-1.66136	0
