# Supplementary material for: Evaluation of a Wearable Non-Invasive Thermometer for Monitoring Ear Canal Temperature during Physically Demanding (Outdoor) Work
Source: Int J Environ Res Public Health. 2021 May 4;18(9):4896. doi: 10.3390/ijerph18094896 (PMC8125248; doi:10.3390/ijerph18094896)
Supplement: Supplementary file 1 [file ijerph-18-04896-s001.zip › Supporting Information files/Field study/Field study - in vivo validation - data subjects RAW.xlsx]

## Sheet: 1
Subject no.	1
			Correctiefactor	1.5
Calibration 1
Zephyr Bioharness on	11:14:00
Measurement no.	Cosinuss	Braun
1	34.9	36.8
2	35.1	36.6
3	35.1	36.9
4	35.2	36.9
5	35.3	36.8
AVG	35.12	36.8
SD	0.148324	0.122474
2 hours working
Material	Start time	End time	Duration job
Cosinuss and CORTES3	11:22:00	12:30:00	01:08:00	Zephyr not working properly
Zephyr Bioharness
Calibration 2
Measurement no.	Cosinuss	Braun
1	34.8	36.6
2	34.8	36.4
3	34.9	36.3
4	34.8	36.4
5	35	36.3
AVG	34.86	36.4
SD	0.0894427	0.122474

## Sheet: 2
Subject no.	2
			Correctiefactor	1
Calibration 1
Zephyr Bioharness on	08:10:15
Measurement no.	Cosinuss	Braun
1	35.1	36.4
2	35.1	36.1
3	35	36.2
4	34.9	36.2
5	34.8	36.1
AVG	34.98	36.2
SD	0.130384	0.122474
2 hours working
Material	Start time	End time	Duration job
Cosinuss and CORTES3	08:20:00	09:40:00	01:20:00	Connection with Cosinuss lost?
Zephyr Bioharness				Not worked in warm environment with high humidity
Calibration 2
Measurement no.	Cosinuss	Braun
1	34.7	36.4
2	34.8	36.4
3	34.7	36.3
4	34.7	36.6
5	34.7	36.9
AVG	34.72	36.52
SD	0.0447214	0.238747

## Sheet: 3
Subject no.	3
			Correctiefactor	0.7
Calibration 1
Zephyr Bioharness on	10:22:00
Measurement no.	Cosinuss	Braun
1	35.5	36.5
2	35.7	36.4
3	35.8	36.5
4	35.9	36.5
5	36	36.5
AVG	35.78	36.48
SD	0.192354	0.0447214
2 hours working
Material	Start time	End time	Duration job
Cosinuss and CORTES3	10:34:00	12:02:00	01:28:00	Not worked in warm environment with high humidity
Zephyr Bioharness
Calibration 2
Measurement no.	Cosinuss	Braun
1	35.6	36.4
2	35.7	36.3
3	35.8	36.3
4	35.9	36.4
5	35.9	36.4
AVG	35.78	36.36
SD	0.130384	0.0547723

## Sheet: 4
Subject no.	4
			Correctiefactor	1.3
Calibration 1
Zephyr Bioharness on	13:10:00
Measurement no.	Cosinuss	Braun
1	35.3	36.9
2	35.5	36.8
3	35.6	36.8
4	35.9	36.7
5	36	36.7
AVG	35.66	36.78
SD	0.288097	0.083666
2 hours working
Material	Start time	End time	Duration job
Cosinuss and CORTES3	13:20:00	15:07:00	01:47:00
Zephyr Bioharness
Calibration 2
Measurement no.	Cosinuss	Braun
1	34.5	36.3
2	34.6	36.3
3	34.8	36
4	34.9	36.2
5	35	36.1
AVG	34.76	36.18
SD	0.207364	0.130384

## Sheet: 5
Subject no.	5
			Correctiefactor	1.7
Calibration 1
Zephyr Bioharness on	08:15:00
Measurement no.	Cosinuss	Braun
1	33.9	35.8
2	33.9	35.6
3	34	35.7
4	34	35.7
5	34.2	35.8
AVG	34	35.72
SD	0.122474	0.083666
2 hours working
Material	Start time	End time	Duration job
Cosinuss and CORTES3	08:31:00	09:59:00	01:28:00
Zephyr Bioharness
Calibration 2
Measurement no.	Cosinuss	Braun
1	32.5	35.7
2	32.9	35.3
3	33.1	35.7
4	33.3	35.3
5	33.5	35.5
AVG	33.06	35.5
SD	0.384708	0.2

## Sheet: 6
Subject no.	6
			Correctiefactor	0.5
Calibration 1
Zephyr Bioharness on	10:33:00
Measurement no.	Cosinuss	Braun
1	36.1	36.5
2	36.3	36.8
3	36.3	36.7
4	36.4	36.7
5	36.5	36.7
AVG	36.32	36.68
SD	0.148324	0.109545
2 hours working
Material	Start time	End time	Duration job
Cosinuss and CORTES3	10:43:00	11:59:00	01:16:00
Zephyr Bioharness
Calibration 2
Measurement no.	Cosinuss	Braun
1	35.1	36.5
2	35.3	36.4
3	35.4	36.4
4	35.5	36.3
5	35.6	36.7
AVG	35.38	36.46
SD	0.192354	0.151658

## Sheet: 7
Subject no.	7
			Correctiefactor	2.1
Calibration 1
Zephyr Bioharness on	13:41:00
Measurement no.	Cosinuss	Braun
1	34.4	36.4
2	34.5	36.6
3	34.6	36.6
4	34.6	36.7
5	34.7	36.7
AVG	34.56	36.6
SD	0.114018	0.122474
2 hours working
Material	Start time	End time	Duration job
Cosinuss and CORTES3	13:50:00	14:44:00	00:54:00
Zephyr Bioharness
Calibration 2
Measurement no.	Cosinuss	Braun
1	34.7	36.2
2	34.7	36.8
3	34.7	36.8
4	34.7	36.7
5	34.7	36.8
AVG	34.7	36.66
SD	0	0.260768

## Sheet: 8
Subject no.	8
			Correctiefactor	1.9
Calibration 1
Zephyr Bioharness on	15:10:00
Measurement no.	Cosinuss	Braun
1	34.5	36.4
2	34.7	36.6
3	34.8	36.6
4	34.9	36.7
5	34.9	36.8
AVG	34.76	36.62
SD	0.167332	0.148324
2 hours working
Material	Start time	End time	Duration job
Cosinuss and CORTES3	15:16:00	16:30:00	01:14:00	Box fall down at end of measurements
Zephyr Bioharness
Calibration 2
Measurement no.	Cosinuss	Braun
1	33.3	36.4
2	33.4	36.4
3	33.4	36.5
4	33.6	36.5
5	33.7	36.6
AVG	33.48	36.48
SD	0.164317	0.083666

## Sheet: 9
Subject no.	9
			Correctiefactor	1.4
Calibration 1
Zephyr Bioharness on	08:10:00
Measurement no.	Cosinuss	Braun
1	35.1	36.7
2	35.3	36.7
3	35.3	36.7
4	35.3	36.5
5	35.1	36.7
AVG	35.22	36.66
SD	0.109545	0.0894427
2 hours working
Material	Start time	End time	Duration job
Cosinuss and CORTES3	08:20:00	09:07:00	00:47:00	part 1	Box was fallen down during measurement and replaced
Zephyr Bioharness	09:11:00	10:05:00	00:54:00	part 2
Calibration 2
Measurement no.	Cosinuss	Braun
1	34.8	36.6
2	34.9	36.6
3	35	36.4
4	35	36.5
5	35.1	36.4
AVG	34.96	36.5
SD	0.114018	0.1

## Sheet: 10
Subject no.	10
			Correctiefactor	0.6
Calibration 1
Zephyr Bioharness on	08:00:00
Measurement no.	Cosinuss	Braun
1	35.8	36.6
2	35.9	36.5
3	36	36.5
4	36	36.3
5	36.1	36.5
AVG	35.96	36.48
SD	0.114018	0.109545
2 hours working
Material	Start time	End time	Duration job
Cosinuss and CORTES3	08:11:00	09:02:00	00:51:00
Zephyr Bioharness
Calibration 2
Measurement no.	Cosinuss	Braun
1	35.4	36.7
2	35.7	36.4
3	35.8	36.7
4	35.8	36.6
5	35.8	36.3
AVG	35.7	36.54
SD	0.173205	0.181659

[truncated: 39 more sheets: 11, 12, 13, 14, 15, 16, 17, 18, 19, 20, 21, 22, 23, 24, 25, 26, 27, 28, 29, 30 …]
