# Supplementary material for: Evaluation of a Wearable Non-Invasive Thermometer for Monitoring Ear Canal Temperature during Physically Demanding (Outdoor) Work
Source: Int J Environ Res Public Health. 2021 May 4;18(9):4896. doi: 10.3390/ijerph18094896 (PMC8125248; doi:10.3390/ijerph18094896)
Supplement: Supplementary file 1 [file ijerph-18-04896-s001.zip › Supporting Information files/Field study/Field study - monitoring - data subjects RAW.xlsx]

## Sheet: 1
Time (h:m:s)	Tc (C)	RH (%)	Ta (C)	Tc (C)	HR (bpm)	Time HR	Correction factor	1.5
00:00:06	35.29	27.21	21.59	36.79
00:00:07	35.29	27.21	21.62	36.79
00:00:08	35.29	27	21.63	36.79
00:00:09	35.29	26.79	21.63	36.79
00:00:10	35.29	26.65	21.64	36.79
00:00:11	35.29	26.72	21.64	36.79
00:00:12	35.29	26.93	21.66	36.79
00:00:13	35.29	26.86	21.66	36.79
00:00:14	35.29	26.65	21.65	36.79
00:00:16	35.29	26.43	21.66	36.79
00:00:17	35.29	26.29	21.66	36.79
00:00:18	35.29	26.36	21.67	36.79
00:00:19	35.29	26.36	21.68	36.79
00:00:20	35.29	26.29	21.67	36.79
00:00:21	35.29	26.36	21.68	36.79
00:00:22	35.29	26.07	21.67	36.79
00:00:23	35.29	25.64	21.66	36.79
00:00:24	35.29	25.43	21.66	36.79
00:00:25	35.29	25.36	21.66	36.79
00:00:26	35.29	25.21	21.65	36.79
00:00:27	35.29	25.14	21.65	36.79
00:00:28	35.29	25.18	21.64	36.79
00:00:29	35.29	25.25	21.65	36.79
00:00:30	35.29	25.21	21.66	36.79
00:00:31	35.29	25.29	21.66	36.79
00:00:32	35.29	25.5	21.67	36.79
00:00:33	35.29	25.57	21.66	36.79
00:00:34	35.29	25.79	21.68	36.79
00:00:35	35.29	26.07	21.65	36.79
00:00:36	35.29	26.22	21.66	36.79
00:00:38	35.29	26.22	21.67	36.79
00:00:39	35.29	26.07	21.66	36.79
00:00:40	35.29	26.07	21.67	36.79
00:00:41	35.28	26	21.67	36.78
00:00:42	35.28	25.89	21.66	36.78
00:00:43	35.28	25.89	21.65	36.78
00:00:44	35.28	25.79	21.66	36.78
00:00:45	35.28	25.75	21.66	36.78
00:00:46	35.29	25.9	21.66	36.79
00:00:47	35.29	26.07	21.66	36.79
00:00:48	35.29	26	21.67	36.79
00:00:49	35.27	26	21.66	36.77
00:00:50	35.27	25.93	21.66	36.77
00:00:51	35.26	26	21.67	36.76
00:00:52	35.25	26	21.66	36.75
00:00:53	35.25	25.97	21.66	36.75
00:00:54	35.25	25.82	21.64	36.75
00:00:55	35.25	25.54	21.64	36.75
00:00:56	35.25	25.36	21.65	36.75
00:00:57	35.25	25.21	21.64	36.75
00:00:59	35.25	25.14	21.64	36.75
00:01:00	35.25	25.21	21.64	36.75
00:01:01	35.25	25.28	21.62	36.75
00:01:02	35.25	25.36	21.63	36.75
00:01:03	35.25	25.57	21.63	36.75
00:01:04	35.25	25.82	21.64	36.75
00:01:05	35.25	26.04	21.64	36.75
00:01:06	35.25	26.22	21.65	36.75
00:01:07	35.25	26.93	21.66	36.75
00:01:08	35.25	27.5	21.65	36.75
00:01:09	35.25	27.86	21.65	36.75
00:01:10	35.25	28.28	21.67	36.75
00:01:11	35.25	28.46	21.66	36.75
00:01:12	35.25	28.39	21.68	36.75
00:01:13	35.25	28.21	21.68	36.75
00:01:14	35.25	28.04	21.68	36.75
00:01:15	35.26	28	21.68	36.76
00:01:16	35.26	28.07	21.68	36.76
00:01:17	35.26	28.07	21.68	36.76
00:01:18	35.26	28.14	21.68	36.76
00:01:19	35.26	28.21	21.69	36.76
00:01:21	35.25	28.28	21.68	36.75
00:01:22	35.25	28.36	21.69	36.75
00:01:23	35.25	28.43	21.69	36.75
00:01:24	35.25	28.5	21.69	36.75
00:01:25	35.25	28.57	21.69	36.75
00:01:26	35.25	28.78	21.69	36.75
00:01:27	35.25	28.99	21.7	36.75
00:01:28	35.25	28.99	21.7	36.75
00:01:29	35.24	29.21	21.7	36.74
00:01:30	35.23	29.56	21.7	36.73
00:01:31	35.22	29.7	21.72	36.72
00:01:32	35.2	29.77	21.72	36.7
00:01:33	35.2	29.84	21.73	36.7
00:01:34	35.21	29.91	21.73	36.71
00:01:35	35.21	29.98	21.73	36.71
00:01:36	35.23	30.05	21.75	36.73
00:01:37	35.23	30.06	21.73	36.73
00:01:38	35.23	30.06	21.75	36.73
00:01:39	35.22	30.16	21.76	36.72
00:01:40	35.22	30.27	21.77	36.72
00:01:42	35.21	30.27	21.76	36.71
00:01:43	35.2	30.37	21.78	36.7
00:01:44	35.2	30.62	21.79	36.7
00:01:45	35.2	30.9	21.79	36.7
00:01:46	35.2	31.04	21.8	36.7
00:01:47	35.2	31.11	21.81	36.7
00:01:48	35.2	31.25	21.8	36.7
00:01:49	35.2	31.29	21.8	36.7
00:01:50	35.2	31.26	21.82	36.7
00:01:51	35.2	31.25	21.82	36.7
00:01:52	35.2	31.19	21.82	36.7
00:01:53	35.2	31.19	21.83	36.7
00:01:54	35.2	31.19	21.82	36.7
00:01:55	35.19	31.26	21.83	36.69
00:01:56	35.18	31.26	21.84	36.68
00:01:57	35.18	31.33	21.84	36.68
00:01:58	35.18	31.33	21.85	36.68
00:01:59	35.16	31.36	21.86	36.66
00:02:00	35.17	31.4	21.86	36.67
00:02:01	35.17	31.47	21.87	36.67
00:02:02	35.17	31.68	21.87	36.67
00:02:04	35.18	31.99	21.88	36.68
00:02:05	35.19	32.03	21.88	36.69
00:02:06	35.19	32.03	21.88	36.69
00:02:07	35.19	32.03	21.88	36.69
00:02:08	35.19	32.06	21.89	36.69
00:02:09	35.19	32.06	21.9	36.69
00:02:10	35.19	32.1	21.9	36.69
00:02:11	35.19	32.21	21.91	36.69
00:02:12	35.19	32.24	21.92	36.69
00:02:13	35.19	32.31	21.92	36.69
00:02:14	35.19	32.31	21.92	36.69
00:02:15	35.2	32.31	21.93	36.7
00:02:16	35.2	32.31	21.94	36.7
00:02:17	35.2	32.35	21.94	36.7
00:02:18	35.2	32.45	21.95	36.7
00:02:19	35.2	32.59	21.96	36.7
00:02:20	35.2	32.63	21.97	36.7
00:02:21	35.2	32.66	21.96	36.7
00:02:22	35.2	32.66	21.97	36.7
00:02:23	35.2	32.66	21.98	36.7
00:02:25	35.2	32.67	21.98	36.7
00:02:26	35.2	32.84	22	36.7
00:02:27	35.2	33.22	22.01	36.7
00:02:28	35.2	33.47	22.01	36.7
00:02:29	35.21	33.5	22.02	36.71
00:02:30	35.21	33.47	22.04	36.71
00:02:31	35.21	33.4	22.04	36.71
00:02:32	35.21	33.3	22.04	36.71
00:02:33	35.21	33.23	22.04	36.71
00:02:34	35.21	33.26	22.06	36.71
00:02:35	35.21	33.23	22.06	36.71
00:02:36	35.23	33.19	22.06	36.73
00:02:37	35.24	33.16	22.08	36.74
00:02:38	35.24	33.23	22.09	36.74
00:02:39	35.25	33.2	22.1	36.75
00:02:40	35.24	33.2	22.1	36.74
00:02:41	35.24	33.23	22.11	36.74
00:02:42	35.24	33.3	22.12	36.74
00:02:43	35.24	33.23	22.13	36.74
00:02:44	35.24	33.2	22.13	36.74
00:02:46	35.25	33.17	22.15	36.75
00:02:47	35.25	33.03	22.15	36.75
00:02:48	35.24	32.89	22.15	36.74
00:02:49	35.24	32.75	22.16	36.74
00:02:50	35.24	32.61	22.16	36.74
00:02:51	35.24	32.47	22.17	36.74
00:02:52	35.23	32.37	22.18	36.73
00:02:53	35.24	32.4	22.19	36.74
00:02:54	35.24	32.54	22.19	36.74
00:02:55	35.23	32.68	22.2	36.73
00:02:56	35.23	33.35	22.22	36.73
00:02:57	35.24	34.14	22.22	36.74
00:02:58	35.23	34.42	22.24	36.73
00:02:59	35.23	34.39	22.23	36.73
00:03:00	35.22	34.18	22.24	36.72
00:03:01	35.21	33.87	22.26	36.71
00:03:02	35.2	33.52	22.26	36.7
00:03:03	35.2	33.11	22.26	36.7
00:03:04	35.2	32.72	22.26	36.7
00:03:05	35.2	32.51	22.26	36.7
00:03:06	35.19	32.41	22.27	36.69
00:03:08	35.18	32.41	22.28	36.68
00:03:09	35.17	32.41	22.28	36.67
00:03:10	35.16	32.48	22.28	36.66
00:03:11	35.16	32.55	22.3	36.66
00:03:12	35.16	32.69	22.31	36.66
00:03:13	35.16	32.76	22.31	36.66
00:03:14	35.16	32.76	22.32	36.66
00:03:15	35.16	32.66	22.33	36.66
00:03:16	35.16	32.49	22.33	36.66
00:03:17	35.16	32.17	22.34	36.66
00:03:18	35.16	31.86	22.34	36.66
00:03:19	35.16	31.58	22.34	36.66
00:03:20	35.16	31.37	22.36	36.66
00:03:21	35.16	31.23	22.37	36.66
00:03:22	35.15	31.3	22.38	36.65
00:03:23	35.15	31.3	22.37	36.65
00:03:24	35.15	31.23	22.39	36.65
00:03:25	35.15	31.09	22.37	36.65
00:03:26	35.15	30.88	22.38	36.65
00:03:27	35.16	30.74	22.4	36.66
00:03:29	35.16	30.6	22.4	36.66
00:03:30	35.17	30.57	22.4	36.67
00:03:31	35.16	30.46	22.4	36.66
00:03:32	35.16	30.39	22.42	36.66
00:03:33	35.16	30.32	22.41	36.66
00:03:34	35.16	30.25	22.42	36.66
00:03:35	35.16	30.18	22.43	36.66
00:03:36	35.17	30.15	22.42	36.67
00:03:37	35.17	30.11	22.45	36.67
00:03:38	35.17	30.11	22.43	36.67
00:03:39	35.17	30.29	22.45	36.67
00:03:40	35.16	30.47	22.45	36.66
00:03:41	35.16	30.68	22.45	36.66
00:03:42	35.16	30.82	22.45	36.66
00:03:43	35.16	30.85	22.46	36.66
00:03:44	35.16	30.96	22.47	36.66
00:03:45	35.15	31.03	22.48	36.65
00:03:46	35.15	31.24	22.49	36.65
00:03:47	35.15	31.31	22.5	36.65
00:03:48	35.14	31.35	22.51	36.64
00:03:49	35.13	31.31	22.51	36.63
00:03:51	35.14	31.24	22.5	36.64
00:03:52	35.13	31.17	22.51	36.63
00:03:53	35.13	31.1	22.5	36.63
00:03:54	35.13	30.96	22.52	36.63
00:03:55	35.12	30.82	22.52	36.62
00:03:56	35.12	30.79	22.54	36.62
00:03:57	35.12	30.68	22.53	36.62
00:03:58	35.11	30.47	22.53	36.61
00:03:59	35.11	30.33	22.52	36.61
00:04:00	35.13	30.19	22.52	36.63
00:04:01	35.12	30.05	22.52	36.62
00:04:02	35.12	29.87	22.52	36.62
00:04:03	35.12	29.77	22.52	36.62
00:04:04	35.12	29.84	22.53	36.62
00:04:05	35.12	29.98	22.52	36.62
00:04:06	35.12	29.98	22.54	36.62
00:04:07	35.12	29.84	22.54	36.62
00:04:08	35.11	29.7	22.54	36.61
00:04:09	35.11	29.63	22.54	36.61
00:04:10	35.1	29.56	22.54	36.6
00:04:12	35.09	29.45	22.54	36.59
00:04:13	35.08	29.27	22.54	36.58
00:04:14	35.09	28.95	22.52	36.59
00:04:15	35.08	28.64	22.54	36.58
00:04:16	35.08	28.64	22.54	36.58
00:04:17	35.08	28.71	22.53	36.58
00:04:18	35.08	28.63	22.54	36.58
00:04:19	35.07	28.49	22.53	36.57
00:04:20	35.07	28.35	22.53	36.57
00:04:21	35.07	28.35	22.52	36.57
00:04:22	35.07	28.49	22.53	36.57
00:04:23	35.07	28.64	22.54	36.57
00:04:24	35.07	28.71	22.54	36.57
00:04:25	35.07	28.71	22.54	36.57
00:04:26	35.07	28.64	22.54	36.57
00:04:27	35.07	28.81	22.54	36.57
00:04:28	35.07	29.06	22.53	36.57
00:04:29	35.06	28.99	22.54	36.56
00:04:30	35.06	28.92	22.54	36.56
00:04:31	35.05	28.85	22.54	36.55
00:04:32	35.04	28.71	22.53	36.54
00:04:34	35.04	28.64	22.54	36.54
00:04:35	35.04	28.57	22.54	36.54
00:04:36	35.03	28.57	22.55	36.53
00:04:37	35.03	28.5	22.55	36.53
00:04:38	35.03	28.49	22.54	36.53
00:04:39	35.02	28.57	22.55	36.52
00:04:40	35.02	28.5	22.56	36.52
00:04:41	35.01	28.46	22.57	36.51
00:04:42	34.99	28.35	22.56	36.49
00:04:43	34.98	28.28	22.56	36.48
00:04:44	34.98	28.21	22.56	36.48
00:04:45	34.97	28.11	22.57	36.47
00:04:46	34.98	28.07	22.57	36.48
00:04:47	34.98	28.07	22.57	36.48
00:04:48	34.97	28.07	22.56	36.47
00:04:49	34.97	28.14	22.57	36.47
00:04:50	34.96	28.21	22.58	36.46
00:04:51	34.95	28.21	22.58	36.45
00:04:52	34.94	28.21	22.58	36.44
00:04:53	34.94	28.25	22.58	36.44
00:04:55	34.94	28.36	22.59	36.44
00:04:56	34.94	28.43	22.6	36.44
00:04:57	34.94	28.64	22.6	36.44
00:04:58	34.93	28.78	22.61	36.43
00:04:59	34.93	28.93	22.61	36.43
00:05:00	34.92	29.07	22.61	36.42
00:05:01	34.92	29.14	22.62	36.42
00:05:02	34.92	29.28	22.62	36.42
00:05:03	34.92	29.42	22.63	36.42
00:05:04	34.91	29.56	22.62	36.41
00:05:05	34.91	29.49	22.62	36.41
00:05:06	34.9	29.32	22.62	36.4
00:05:07	34.89	29.14	22.62	36.39
00:05:08	34.89	29.07	22.62	36.39
00:05:09	34.89	29.03	22.62	36.39
00:05:10	34.89	28.82	22.62	36.39
00:05:11	34.89	28.57	22.63	36.39
00:05:12	34.89	28.36	22.62	36.39
00:05:13	34.89	28.29	22.62	36.39
00:05:14	34.89	28.36	22.63	36.39
00:05:15	34.88	28.36	22.64	36.38
00:05:17	34.88	28.39	22.65	36.38
00:05:18	34.89	28.43	22.64	36.39
00:05:19	34.89	28.64	22.64	36.39
00:05:20	34.88	28.86	22.65	36.38
00:05:21	34.88	28.96	22.66	36.38
00:05:22	34.88	29.04	22.66	36.38
00:05:23	34.88	29.14	22.66	36.38
00:05:24	34.87	29.07	22.66	36.37
00:05:25	34.88	29	22.66	36.38
00:05:26	34.88	29	22.67	36.38
00:05:27	34.88	28.93	22.68	36.38
00:05:28	34.87	28.93	22.68	36.37
00:05:29	34.87	28.86	22.68	36.37
00:05:30	34.88	28.86	22.68	36.38
00:05:31	34.88	28.82	22.68	36.38
00:05:32	34.89	28.86	22.68	36.39
00:05:33	34.9	28.72	22.67	36.4
00:05:34	34.9	28.61	22.67	36.4
00:05:35	34.9	28.43	22.66	36.4
00:05:36	34.9	28.25	22.66	36.4
00:05:38	34.9	28.15	22.66	36.4
00:05:39	34.89	28.15	22.66	36.39
00:05:40	34.89	28.26	22.68	36.39
00:05:41	34.9	28.33	22.68	36.4
00:05:42	34.9	28.4	22.68	36.4
00:05:43	34.9	28.44	22.68	36.4
00:05:44	34.91	28.51	22.7	36.41
00:05:45	34.92	28.58	22.7	36.42
00:05:46	34.92	28.65	22.7	36.42
00:05:47	34.93	28.72	22.71	36.43
00:05:48	34.94	28.72	22.71	36.44
00:05:49	34.95	28.79	22.72	36.45
00:05:50	34.95	28.93	22.72	36.45
00:05:51	34.94	29.15	22.73	36.44
00:05:52	34.94	29.29	22.73	36.44
00:05:53	34.93	29.78	22.73	36.43
00:05:54	34.93	30.24	22.73	36.43
00:05:55	34.93	30.35	22.75	36.43
00:05:56	34.94	30.35	22.74	36.44
00:05:57	34.93	30.35	22.74	36.43
00:05:58	34.93	30.24	22.76	36.43
00:06:00	34.93	30.14	22.75	36.43
00:06:01	34.93	30.1	22.75	36.43
00:06:02	34.93	30.14	22.76	36.43
00:06:03	34.94	30.1	22.75	36.44
00:06:04	34.94	30.07	22.76	36.44
00:06:05	34.94	30.04	22.76	36.44
00:06:06	34.94	29.93	22.77	36.44
00:06:07	34.94	29.86	22.77	36.44
00:06:08	34.94	29.93	22.78	36.44
00:06:09	34.94	29.96	22.78	36.44
00:06:10	34.94	29.93	22.79	36.44
00:06:11	34.94	29.93	22.79	36.44
00:06:12	34.94	29.93	22.79	36.44
00:06:13	34.94	29.9	22.79	36.44
00:06:14	34.94	29.9	22.8	36.44
00:06:15	34.94	29.93	22.8	36.44
00:06:16	34.94	29.93	22.81	36.44
00:06:17	34.94	29.97	22.8	36.44
00:06:18	34.94	30.07	22.81	36.44
00:06:19	34.94	30.14	22.82	36.44
00:06:21	34.94	30.14	22.82	36.44
00:06:22	34.94	30.14	22.82	36.44
00:06:23	34.94	30.18	22.82	36.44
00:06:24	34.94	30.18	22.82	36.44
00:06:25	34.94	30.07	22.82	36.44
00:06:26	34.94	29.86	22.82	36.44
00:06:27	34.94	29.69	22.83	36.44
00:06:28	34.94	29.51	22.83	36.44
00:06:29	34.94	29.22	22.82	36.44
00:06:30	34.94	29.15	22.82	36.44
00:06:31	34.94	29.16	22.83	36.44
00:06:32	34.94	29.08	22.82	36.44
00:06:33	34.94	29.01	22.83	36.44
00:06:34	34.94	28.87	22.84	36.44
00:06:35	34.94	28.8	22.84	36.44
00:06:36	34.94	28.87	22.84	36.44
00:06:37	34.94	29.05	22.84	36.44
00:06:38	34.95	29.12	22.84	36.45
00:06:39	34.95	29.09	22.85	36.45
00:06:40	34.95	29.09	22.85	36.45
00:06:42	34.95	29.16	22.86	36.45
00:06:43	34.94	29.16	22.86	36.44
00:06:44	34.93	29.16	22.86	36.43
00:06:45	34.93	29.09	22.86	36.43
00:06:46	34.93	29.09	22.86	36.43
00:06:47	34.92	29.09	22.86	36.42
00:06:48	34.93	29.02	22.87	36.43
00:06:49	34.93	28.91	22.87	36.43
00:06:50	34.93	28.66	22.86	36.43
00:06:51	34.92	28.48	22.88	36.42
00:06:52	34.93	28.45	22.88	36.43
00:06:53	34.92	28.56	22.89	36.42
00:06:54	34.91	28.63	22.88	36.41
00:06:55	34.91	28.66	22.9	36.41
00:06:56	34.91	28.59	22.88	36.41
00:06:57	34.91	28.52	22.89	36.41
00:06:58	34.91	28.45	22.89	36.41
00:06:59	34.9	28.38	22.88	36.4
00:07:00	34.9	28.31	22.87	36.4
00:07:01	34.89	28.24	22.87	36.39
00:07:02	34.89	28.24	22.88	36.39
00:07:04	34.89	28.16	22.88	36.39
00:07:05	34.89	28.24	22.88	36.39
00:07:06	34.89	28.31	22.88	36.39
00:07:07	34.89	28.45	22.89	36.39
00:07:08	34.89	28.38	22.88	36.39
00:07:09	34.89	28.34	22.88	36.39
00:07:10	34.89	28.24	22.87	36.39
00:07:11	34.88	28.34	22.88	36.38
00:07:12	34.88	28.31	22.88	36.38
00:07:13	34.87	28.27	22.88	36.37
00:07:14	34.86	28.24	22.87	36.36
00:07:15	34.86	28.2	22.87	36.36
00:07:16	34.85	28.16	22.86	36.35
00:07:17	34.85	28.16	22.88	36.35
00:07:18	34.85	28.13	22.86	36.35
00:07:19	34.85	28.2	22.87	36.35
00:07:20	34.85	28.24	22.87	36.35
00:07:21	34.85	28.34	22.86	36.35
00:07:22	34.84	28.38	22.87	36.34
00:07:23	34.84	28.38	22.87	36.34
00:07:25	34.84	28.38	22.87	36.34
00:07:26	34.83	28.45	22.89	36.33
00:07:27	34.82	28.45	22.87	36.32
00:07:28	34.82	28.52	22.88	36.32
00:07:29	34.81	28.52	22.88	36.31
00:07:30	34.81	28.52	22.89	36.31
00:07:31	34.81	28.59	22.89	36.31
00:07:32	34.81	28.7	22.89	36.31
00:07:33	34.81	28.81	22.9	36.31
00:07:34	34.8	28.88	22.9	36.3
00:07:35	34.8	28.95	22.9	36.3
00:07:36	34.8	28.95	22.89	36.3
00:07:37	34.8	29.05	22.9	36.3
00:07:38	34.81	29.23	22.9	36.31
00:07:39	34.8	29.37	22.9	36.3
00:07:40	34.79	29.44	22.9	36.29
00:07:41	34.78	29.52	22.91	36.28
00:07:42	34.77	29.52	22.9	36.27
00:07:43	34.76	29.3	22.91	36.26
00:07:44	34.76	29.16	22.92	36.26
00:07:45	34.75	29.16	22.92	36.25
00:07:47	34.74	29.09	22.92	36.24
00:07:48	34.73	29.16	22.93	36.23
00:07:49	34.73	29.13	22.92	36.23
00:07:50	34.72	29.09	22.92	36.22
00:07:51	34.72	29.13	22.93	36.22
00:07:52	34.72	29.16	22.94	36.22
00:07:53	34.72	29.23	22.94	36.22
00:07:54	34.73	29.23	22.94	36.23
00:07:55	34.73	29.27	22.95	36.23
00:07:56	34.73	29.31	22.95	36.23
00:07:57	34.73	29.31	22.96	36.23
00:07:58	34.73	29.41	22.95	36.23
00:07:59	34.72	29.45	22.96	36.22
00:08:00	34.72	29.38	22.96	36.22
00:08:01	34.72	29.41	22.96	36.22
00:08:02	34.72	29.45	22.96	36.22
00:08:03	34.72	29.45	22.97	36.22
00:08:04	34.72	29.49	22.97	36.22
00:08:05	34.72	29.49	22.98	36.22
00:08:06	34.72	29.52	22.98	36.22
00:08:08	34.72	29.52	22.98	36.22
00:08:09	34.72	29.59	23	36.22
00:08:10	34.71	29.59	22.98	36.21
00:08:11	34.71	29.74	23	36.21
00:08:12	34.71	29.77	23	36.21
00:08:13	34.7	29.81	23	36.2
00:08:14	34.7	29.81	23	36.2
00:08:15	34.71	29.88	23	36.21
00:08:16	34.7	29.88	23.02	36.2
00:08:17	34.7	29.81	23.01	36.2
00:08:18	34.7	29.84	23.01	36.2
00:08:19	34.68	29.88	23.02	36.18
00:08:20	34.65	29.88	23.02	36.15
00:08:21	34.63	29.88	23.02	36.13
00:08:22	34.62	29.88	23.04	36.12
00:08:23	34.62	29.81	23.03	36.12
00:08:24	34.6	29.6	23.03	36.1
00:08:25	34.59	29.74	23.04	36.09
00:08:26	34.59	29.81	23.05	36.09
00:08:27	34.58	29.88	23.06	36.08
00:08:28	34.57	29.95	23.07	36.07
00:08:30	34.58	30.02	23.08	36.08
00:08:31	34.58	30.02	23.08	36.08
00:08:32	34.58	30.09	23.07	36.08
00:08:33	34.59	30.1	23.08	36.09
00:08:34	34.6	30.17	23.08	36.1
00:08:35	34.61	30.2	23.09	36.11
00:08:36	34.62	30.38	23.09	36.12
00:08:37	34.64	30.52	23.1	36.14
00:08:38	34.65	30.63	23.12	36.15
00:08:39	34.66	30.66	23.11	36.16
00:08:40	34.66	30.73	23.11	36.16
00:08:41	34.67	30.8	23.13	36.17
00:08:42	34.67	30.95	23.16	36.17
00:08:43	34.66	30.95	23.15	36.16
00:08:44	34.66	30.95	23.16	36.16
00:08:45	34.66	30.95	23.16	36.16
00:08:46	34.65	30.95	23.16	36.15
00:08:47	34.64	30.88	23.16	36.14
00:08:48	34.64	30.88	23.16	36.14
00:08:50	34.64	30.88	23.18	36.14
00:08:51	34.64	30.88	23.17	36.14
00:08:52	34.63	30.81	23.18	36.13
00:08:53	34.64	30.81	23.19	36.14
00:08:54	34.64	30.81	23.18	36.14
00:08:55	34.64	30.77	23.2	36.14
00:08:56	34.64	30.7	23.2	36.14
00:08:57	34.66	30.6	23.21	36.16
00:08:58	34.66	30.46	23.22	36.16
00:08:59	34.67	30.39	23.22	36.17
00:09:00	34.66	30.32	23.22	36.16
00:09:01	34.66	30.32	23.22	36.16
00:09:02	34.66	30.25	23.23	36.16
00:09:03	34.66	30.18	23.22	36.16
00:09:04	34.67	30.32	23.23	36.17
00:09:05	34.67	30.39	23.25	36.17
00:09:06	34.67	30.43	23.25	36.17
00:09:07	34.67	30.46	23.25	36.17
00:09:08	34.68	30.5	23.25	36.18
00:09:10	34.68	30.53	23.26	36.18
00:09:11	34.69	30.53	23.26	36.19
00:09:12	34.69	30.46	23.26	36.19
00:09:13	34.69	30.36	23.26	36.19
00:09:14	34.68	30.25	23.27	36.18
00:09:15	34.69	30.25	23.28	36.19
00:09:16	34.69	30.39	23.28	36.19
00:09:17	34.7	30.46	23.29	36.2
00:09:18	34.71	30.5	23.28	36.21
00:09:19	34.72	30.53	23.29	36.22
00:09:20	34.72	30.46	23.28	36.22
00:09:21	34.72	30.4	23.3	36.22
00:09:22	34.72	30.5	23.29	36.22
00:09:23	34.72	30.61	23.3	36.22
00:09:24	34.72	30.5	23.3	36.22
00:09:25	34.72	30.47	23.32	36.22
00:09:26	34.72	30.4	23.32	36.22
00:09:27	34.72	30.4	23.31	36.22
00:09:29	34.72	30.4	23.31	36.22
00:09:30	34.71	30.54	23.32	36.21
00:09:31	34.71	30.61	23.33	36.21
00:09:32	34.71	30.68	23.34	36.21
00:09:33	34.7	30.75	23.35	36.2
00:09:34	34.7	30.79	23.36	36.2
00:09:35	34.71	30.75	23.35	36.21
00:09:36	34.71	30.79	23.35	36.21
00:09:37	34.72	30.89	23.36	36.22
00:09:38	34.73	30.89	23.36	36.23
00:09:39	34.73	30.75	23.36	36.23
00:09:40	34.74	30.68	23.38	36.24
00:09:41	34.73	30.61	23.39	36.23
00:09:42	34.74	30.54	23.38	36.24
00:09:43	34.75	30.47	23.38	36.25
00:09:44	34.74	30.4	23.39	36.24
00:09:46	34.73	30.47	23.4	36.23
00:09:47	34.74	30.51	23.41	36.24
00:09:48	34.73	30.54	23.4	36.23
00:09:49	34.73	30.62	23.41	36.23
00:09:50	34.74	30.65	23.42	36.24
00:09:51	34.74	30.72	23.44	36.24
00:09:52	34.72	30.83	23.43	36.22
00:09:53	34.72	30.76	23.44	36.22
00:09:54	34.72	30.72	23.43	36.22
00:09:55	34.7	30.76	23.45	36.2
00:09:56	34.71	30.76	23.45	36.21
00:09:57	34.71	30.76	23.46	36.21
00:09:58	34.71	30.83	23.47	36.21
00:09:59	34.7	30.94	23.47	36.2
00:10:00	34.69	30.9	23.48	36.19
00:10:01	34.68	30.69	23.48	36.18
00:10:03	34.67	30.69	23.48	36.17
00:10:04	34.66	30.66	23.49	36.16
00:10:05	34.66	30.48	23.49	36.16
00:10:06	34.68	30.41	23.49	36.18
00:10:07	34.68	30.41	23.5	36.18
00:10:08	34.69	30.48	23.5	36.19
00:10:09	34.69	30.59	23.52	36.19
00:10:10	34.7	30.7	23.52	36.2
00:10:11	34.7	30.7	23.51	36.2
00:10:12	34.72	30.77	23.53	36.22
00:10:13	34.73	30.77	23.53	36.23
00:10:14	34.72	30.84	23.53	36.22
00:10:15	34.72	30.87	23.54	36.22
00:10:16	34.72	30.91	23.54	36.22
00:10:18	34.72	30.98	23.55	36.22
00:10:19	34.72	30.95	23.56	36.22
00:10:20	34.73	30.98	23.56	36.23
00:10:21	34.72	30.98	23.56	36.22
00:10:22	34.73	30.91	23.56	36.23
00:10:23	34.73	30.91	23.58	36.23
00:10:24	34.74	30.98	23.58	36.24
00:10:25	34.75	31.05	23.58	36.25
00:10:26	34.76	31.05	23.6	36.26
00:10:27	34.76	31.09	23.6	36.26
00:10:28	34.76	31.06	23.61	36.26
00:10:29	34.76	31.05	23.61	36.26
00:10:30	34.77	31.02	23.61	36.27
00:10:31	34.77	30.92	23.62	36.27
00:10:32	34.78	30.85	23.62	36.28
00:10:34	34.78	30.81	23.63	36.28
00:10:35	34.79	30.78	23.64	36.29
00:10:36	34.78	30.78	23.63	36.28
00:10:37	34.78	30.78	23.64	36.28
00:10:38	34.77	30.85	23.64	36.27
00:10:39	34.78	30.92	23.66	36.28
00:10:40	34.78	30.92	23.67	36.28
00:10:41	34.79	30.85	23.67	36.29
00:10:42	34.81	30.78	23.68	36.31
00:10:43	34.81	30.64	23.68	36.31
00:10:44	34.81	30.64	23.68	36.31
00:10:45	34.8	30.5	23.68	36.3
00:10:46	34.8	30.43	23.68	36.3
00:10:47	34.79	30.43	23.69	36.29
00:10:49	34.79	30.43	23.7	36.29
00:10:50	34.78	30.57	23.7	36.28
00:10:51	34.79	30.68	23.71	36.29
00:10:52	34.79	30.71	23.7	36.29
00:10:53	34.8	30.64	23.72	36.3
00:10:54	34.8	30.68	23.73	36.3
00:10:55	34.8	30.71	23.73	36.3
00:10:56	34.8	30.71	23.72	36.3
00:10:57	34.79	30.71	23.73	36.29
00:10:58	34.79	30.71	23.74	36.29
00:10:59	34.8	30.78	23.75	36.3
00:11:00	34.8	30.79	23.75	36.3
00:11:01	34.81	30.82	23.76	36.31
00:11:02	34.81	30.86	23.76	36.31
00:11:03	34.81	30.86	23.76	36.31
00:11:05	34.8	30.86	23.77	36.3
00:11:06	34.8	30.79	23.78	36.3
00:11:07	34.8	30.86	23.77	36.3
00:11:08	34.79	30.86	23.8	36.29
00:11:09	34.79	30.82	23.79	36.29
00:11:10	34.79	30.75	23.8	36.29
00:11:11	34.79	30.72	23.81	36.29
00:11:12	34.79	30.58	23.82	36.29
00:11:13	34.8	30.51	23.82	36.3
00:11:14	34.82	30.51	23.82	36.32
00:11:15	34.82	30.51	23.82	36.32
00:11:16	34.82	30.33	23.82	36.32
00:11:17	34.82	30.19	23.83	36.32
00:11:18	34.82	30.02	23.84	36.32
00:11:20	34.81	30.09	23.85	36.31
00:11:21	34.82	30.23	23.85	36.32
00:11:22	34.82	30.34	23.85	36.32
00:11:23	34.81	30.44	23.86	36.31
00:11:24	34.8	30.58	23.86	36.3
00:11:25	34.79	30.62	23.88	36.29
00:11:26	34.78	30.44	23.89	36.28
00:11:27	34.78	30.3	23.9	36.28
00:11:28	34.81	30.16	23.91	36.31
00:11:29	34.82	30.02	23.9	36.32
00:11:30	34.83	29.74	23.9	36.33
00:11:31	34.84	29.6	23.91	36.34
00:11:32	34.83	29.74	23.91	36.33
00:11:33	34.81	29.85	23.92	36.31
00:11:34	34.82	29.95	23.92	36.32
00:11:36	34.81	29.92	23.92	36.31
00:11:37	34.81	29.88	23.92	36.31
00:11:38	34.82	29.88	23.94	36.32
00:11:39	34.84	29.88	23.93	36.34
00:11:40	34.83	29.95	23.93	36.33
00:11:41	34.83	30.02	23.94	36.33
00:11:42	34.82	30.1	23.94	36.32
00:11:43	34.81	30.09	23.94	36.31
00:11:44	34.81	30.17	23.95	36.31
00:11:45	34.81	30.31	23.94	36.31
00:11:46	34.81	30.45	23.96	36.31
00:11:47	34.81	30.38	23.96	36.31
00:11:48	34.81	30.38	23.96	36.31
00:11:49	34.81	30.31	23.97	36.31
00:11:51	34.8	30.17	23.96	36.3
00:11:52	34.79	30.17	23.96	36.29
00:11:53	34.78	30.31	23.98	36.28
00:11:54	34.77	30.38	23.99	36.27
00:11:55	34.76	30.42	23.97	36.26
00:11:56	34.75	30.45	23.99	36.25
00:11:57	34.76	30.52	24	36.26
00:11:58	34.76	30.59	24	36.26
00:11:59	34.79	30.59	24.01	36.29
00:12:00	34.82	30.6	24.01	36.32
00:12:01	34.83	30.81	24	36.33
00:12:02	34.84	31.05	24.02	36.34
00:12:03	34.83	31.23	24.02	36.33
00:12:04	34.82	31.3	24.03	36.32
00:12:05	34.82	31.3	24.04	36.32
00:12:07	34.81	31.37	24.03	36.31
00:12:08	34.83	31.37	24.02	36.33
00:12:09	34.84	31.37	24.04	36.34
00:12:10	34.85	31.38	24.06	36.35
00:12:11	34.87	31.38	24.05	36.37
00:12:12	34.88	31.38	24.06	36.38
00:12:13	34.88	31.38	24.07	36.38
00:12:14	34.87	31.34	24.07	36.37
00:12:15	34.87	31.38	24.08	36.37
00:12:16	34.87	31.38	24.09	36.37
00:12:17	34.87	31.38	24.09	36.37
00:12:18	34.88	31.38	24.09	36.38
00:12:19	34.88	31.38	24.09	36.38
00:12:20	34.87	31.41	24.11	36.37
00:12:22	34.86	31.45	24.11	36.36
00:12:23	34.85	31.45	24.11	36.35
00:12:24	34.86	31.45	24.12	36.36
00:12:25	34.87	31.52	24.12	36.37
00:12:26	34.87	31.49	24.13	36.37
00:12:27	34.88	31.45	24.13	36.38
00:12:28	34.89	31.45	24.12	36.39
00:12:29	34.89	31.45	24.13	36.39
00:12:30	34.9	31.42	24.14	36.4
00:12:31	34.9	31.45	24.14	36.4
00:12:32	34.9	31.52	24.14	36.4
00:12:33	34.9	31.52	24.15	36.4
00:12:34	34.9	31.49	24.15	36.4
00:12:35	34.9	31.52	24.16	36.4
00:12:36	34.89	31.53	24.16	36.39
00:12:38	34.88	31.53	24.16	36.38
00:12:39	34.87	31.53	24.18	36.37
00:12:40	34.87	31.6	24.17	36.37
00:12:41	34.86	31.6	24.17	36.36
00:12:42	34.86	31.6	24.18	36.36
00:12:43	34.86	31.6	24.2	36.36
00:12:44	34.86	31.6	24.19	36.36
00:12:45	34.86	31.6	24.19	36.36
00:12:46	34.87	31.53	24.2	36.37
00:12:47	34.88	31.53	24.21	36.38
00:12:48	34.89	31.53	24.21	36.39
00:12:49	34.9	31.6	24.22	36.4
00:12:50	34.9	31.6	24.22	36.4
00:12:51	34.9	31.6	24.22	36.4
00:12:52	34.9	31.56	24.24	36.4
00:12:54	34.89	31.53	24.23	36.39
00:12:55	34.88	31.53	24.24	36.38
00:12:56	34.88	31.57	24.25	36.38
00:12:57	34.88	31.6	24.25	36.38
00:12:58	34.88	31.64	24.26	36.38
00:12:59	34.89	31.67	24.26	36.39
00:13:00	34.9	31.71	24.26	36.4
00:13:01	34.9	31.74	24.26	36.4
00:13:02	34.9	31.67	24.27	36.4
00:13:03	34.9	31.6	24.28	36.4
00:13:04	34.9	31.6	24.27	36.4
00:13:05	34.9	31.75	24.3	36.4
00:13:06	34.9	31.89	24.28	36.4
00:13:07	34.9	31.96	24.29	36.4
00:13:09	34.9	31.92	24.3	36.4
00:13:10	34.9	31.89	24.3	36.4
00:13:11	34.9	31.89	24.32	36.4
00:13:12	34.9	31.85	24.32	36.4
00:13:13	34.9	31.85	24.31	36.4
00:13:14	34.9	31.89	24.32	36.4
00:13:15	34.9	31.82	24.33	36.4
00:13:16	34.9	31.85	24.34	36.4
00:13:17	34.91	31.78	24.34	36.41
00:13:18	34.92	31.68	24.33	36.42
00:13:19	34.92	31.68	24.34	36.42
00:13:20	34.93	31.61	24.35	36.43
00:13:21	34.93	31.58	24.34	36.43
00:13:22	34.92	31.61	24.36	36.42
00:13:24	34.92	31.61	24.37	36.42
00:13:25	34.93	31.58	24.37	36.43
00:13:26	34.93	31.54	24.36	36.43
00:13:27	34.93	31.51	24.37	36.43
00:13:28	34.93	31.54	24.39	36.43
00:13:29	34.93	31.54	24.39	36.43
00:13:30	34.91	31.54	24.4	36.41
00:13:31	34.91	31.54	24.41	36.41
00:13:32	34.92	31.51	24.4	36.42
00:13:33	34.92	31.54	24.4	36.42
00:13:34	34.93	31.69	24.42	36.43
00:13:35	34.93	31.9	24.43	36.43
00:13:36	34.93	32.04	24.44	36.43
00:13:37	34.93	31.97	24.44	36.43
00:13:38	34.93	31.97	24.44	36.43
00:13:40	34.94	31.93	24.44	36.44
00:13:41	34.94	31.9	24.45	36.44
00:13:42	34.94	31.87	24.45	36.44
00:13:43	34.94	31.83	24.46	36.44
00:13:44	34.94	31.83	24.46	36.44
00:13:45	34.94	31.9	24.46	36.44
00:13:46	34.94	31.9	24.48	36.44
00:13:47	34.94	31.9	24.47	36.44
00:13:48	34.94	31.9	24.48	36.44
00:13:49	34.94	31.83	24.48	36.44
00:13:50	34.94	31.76	24.48	36.44
00:13:51	34.94	31.76	24.5	36.44
00:13:52	34.95	31.69	24.5	36.45
00:13:53	34.95	31.69	24.51	36.45
00:13:55	34.94	31.69	24.51	36.44
00:13:56	34.94	31.69	24.52	36.44
00:13:57	34.94	31.69	24.51	36.44
00:13:58	34.93	31.69	24.52	36.43
00:13:59	34.93	31.59	24.52	36.43
00:14:00	34.93	31.31	24.52	36.43
00:14:01	34.93	31.2	24.52	36.43
00:14:02	34.92	31.1	24.54	36.42
00:14:03	34.9	31.06	24.54	36.4
00:14:04	34.89	31.13	24.54	36.39
00:14:05	34.88	31.27	24.54	36.38
00:14:06	34.88	31.38	24.55	36.38
00:14:07	34.89	31.45	24.56	36.39
00:14:08	34.88	31.45	24.56	36.38
00:14:09	34.87	31.49	24.57	36.37
00:14:11	34.86	31.49	24.56	36.36
00:14:12	34.86	31.56	24.59	36.36
00:14:13	34.85	31.56	24.59	36.35
00:14:14	34.86	31.6	24.59	36.36
00:14:15	34.86	31.63	24.59	36.36
00:14:16	34.87	31.7	24.6	36.37
00:14:17	34.88	31.7	24.61	36.38
00:14:18	34.89	31.67	24.61	36.39
00:14:19	34.9	31.6	24.61	36.4
00:14:20	34.89	31.56	24.61	36.39
00:14:21	34.88	31.46	24.62	36.38
00:14:22	34.87	31.49	24.62	36.37
00:14:23	34.85	31.56	24.64	36.35
00:14:24	34.84	31.71	24.65	36.34
00:14:26	34.83	31.78	24.64	36.33
00:14:27	34.81	31.85	24.64	36.31
00:14:28	34.8	31.85	24.65	36.3
00:14:29	34.78	31.78	24.65	36.28
00:14:30	34.78	31.74	24.65	36.28
00:14:31	34.78	31.71	24.68	36.28
00:14:32	34.79	31.64	24.67	36.29
00:14:33	34.79	31.57	24.68	36.29
00:14:34	34.8	31.5	24.68	36.3
00:14:35	34.81	31.43	24.68	36.31
00:14:36	34.83	31.29	24.68	36.33
00:14:37	34.85	31.29	24.69	36.35
00:14:38	34.86	31.36	24.68	36.36
00:14:39	34.87	31.47	24.7	36.37
00:14:40	34.87	31.5	24.7	36.37
00:14:42	34.86	31.57	24.71	36.36
00:14:43	34.85	31.64	24.71	36.35
00:14:44	34.86	31.71	24.72	36.36
00:14:45	34.86	31.78	24.73	36.36
00:14:46	34.87	31.82	24.74	36.37
00:14:47	34.88	31.78	24.74	36.38
00:14:48	34.89	31.78	24.74	36.39
00:14:49	34.88	31.78	24.74	36.38
00:14:50	34.88	31.79	24.76	36.38
00:14:51	34.87	31.79	24.75	36.37
00:14:52	34.87	31.86	24.78	36.37
00:14:53	34.88	31.86	24.76	36.38
00:14:54	34.87	32	24.77	36.37
00:14:55	34.87	32.14	24.78	36.37
00:14:56	34.88	32.21	24.78	36.38
00:14:58	34.87	32.25	24.8	36.37
00:14:59	34.87	32.18	24.8	36.37
00:15:00	34.88	32.11	24.8	36.38
00:15:01	34.89	32.11	24.79	36.39
00:15:02	34.89	32.07	24.81	36.39
00:15:03	34.9	32.07	24.81	36.4
00:15:04	34.91	32.14	24.82	36.41
00:15:05	34.9	32.18	24.82	36.4
00:15:06	34.88	32.14	24.83	36.38
00:15:07	34.89	32.07	24.84	36.39
00:15:08	34.88	32.07	24.84	36.38
00:15:09	34.9	32.07	24.85	36.4
00:15:10	34.92	31.94	24.85	36.42
00:15:11	34.93	31.83	24.86	36.43
00:15:13	34.93	31.79	24.87	36.43
00:15:14	34.94	31.76	24.86	36.44
00:15:15	34.93	31.8	24.88	36.43
00:15:16	34.93	31.66	24.87	36.43
00:15:17	34.93	31.58	24.88	36.43
00:15:18	34.92	31.52	24.88	36.42
00:15:19	34.92	31.52	24.88	36.42
00:15:20	34.92	31.45	24.9	36.42
00:15:21	34.92	31.38	24.9	36.42
00:15:22	34.93	31.31	24.91	36.43
00:15:23	34.93	31.2	24.9	36.43
00:15:24	34.94	31.09	24.92	36.44
00:15:25	34.94	31.1	24.92	36.44
00:15:26	34.94	31.1	24.91	36.44
00:15:28	34.95	31.03	24.92	36.45
00:15:29	34.95	31.1	24.93	36.45
00:15:30	34.95	31.17	24.94	36.45
00:15:31	34.95	31.17	24.93	36.45
00:15:32	34.95	31.13	24.94	36.45
00:15:33	34.94	31.1	24.94	36.44
00:15:34	34.94	31.03	24.95	36.44
00:15:35	34.94	30.96	24.94	36.44
00:15:36	34.93	30.96	24.96	36.43
00:15:37	34.92	30.96	24.95	36.42
00:15:38	34.92	31.1	24.96	36.42
00:15:39	34.92	31.24	24.98	36.42
00:15:40	34.93	31.38	24.98	36.43
00:15:41	34.92	31.49	24.98	36.42
00:15:42	34.93	31.52	24.97	36.43
00:15:44	34.93	31.56	25	36.43
00:15:45	34.93	31.45	25	36.43
00:15:46	34.93	31.45	25	36.43
00:15:47	34.94	31.45	25	36.44
00:15:48	34.94	31.53	25.01	36.44
00:15:49	34.94	31.67	25.02	36.44
00:15:50	34.94	31.67	25.01	36.44
00:15:51	34.94	31.74	25.02	36.44
00:15:52	34.94	31.74	25.02	36.44
00:15:53	34.95	31.67	25.02	36.45
00:15:54	34.96	31.67	25.04	36.46
00:15:55	34.97	31.78	25.04	36.47
00:15:56	34.97	31.88	25.04	36.47
00:15:57	34.96	31.88	25.04	36.46
00:15:59	34.96	31.88	25.07	36.46
00:16:00	34.95	31.88	25.06	36.45
00:16:01	34.94	31.88	25.07	36.44
00:16:02	34.95	31.88	25.07	36.45
00:16:03	34.96	31.88	25.08	36.46
00:16:04	34.97	31.81	25.08	36.47
00:16:05	34.97	31.81	25.08	36.47
00:16:06	34.98	31.81	25.1	36.48
00:16:07	34.98	31.81	25.09	36.48
00:16:08	34.97	31.85	25.1	36.47
00:16:09	34.97	31.89	25.1	36.47
00:16:10	34.97	31.96	25.11	36.47
00:16:11	34.97	31.89	25.11	36.47
00:16:12	34.97	31.78	25.11	36.47
00:16:13	34.97	31.75	25.12	36.47
00:16:15	34.97	31.75	25.12	36.47
00:16:16	34.97	31.5	25.13	36.47
00:16:17	34.98	31.22	25.13	36.48
00:16:18	34.98	31.18	25.13	36.48
00:16:19	34.98	31.04	25.14	36.48
00:16:20	34.98	30.9	25.14	36.48
00:16:21	34.98	30.76	25.14	36.48
00:16:22	34.98	30.76	25.14	36.48
00:16:23	34.98	30.83	25.15	36.48
00:16:24	34.97	30.83	25.15	36.47
00:16:25	34.97	30.83	25.16	36.47
00:16:26	34.97	30.76	25.15	36.47
00:16:27	34.97	30.76	25.16	36.47
00:16:28	34.96	30.83	25.17	36.46
00:16:30	34.97	30.98	25.18	36.47
00:16:31	34.97	31.12	25.18	36.47
00:16:32	34.97	31.26	25.2	36.47
00:16:33	34.96	31.33	25.2	36.46
00:16:34	34.97	31.33	25.2	36.47
00:16:35	34.97	31.4	25.22	36.47
00:16:36	34.97	31.4	25.21	36.47
00:16:37	34.96	31.47	25.22	36.46
00:16:38	34.97	31.47	25.22	36.47
00:16:39	34.97	31.44	25.22	36.47
00:16:40	34.97	31.3	25.24	36.47
00:16:41	34.97	31.23	25.24	36.47
00:16:42	34.96	31.26	25.24	36.46
00:16:43	34.94	31.12	25.25	36.44
00:16:44	34.93	31.09	25.25	36.43
00:16:46	34.93	31.44	25.26	36.43
00:16:47	34.93	31.83	25.26	36.43
00:16:48	34.93	32.11	25.27	36.43
00:16:49	34.94	32.25	25.27	36.44
00:16:50	34.94	32.61	25.29	36.44
00:16:51	34.94	32.78	25.28	36.44
00:16:52	34.95	32.39	25.29	36.45
00:16:53	34.96	31.9	25.29	36.46
00:16:54	34.96	31.59	25.29	36.46
00:16:55	34.97	31.41	25.29	36.47
00:16:56	34.97	31.34	25.3	36.47
00:16:57	34.97	31.27	25.29	36.47
00:16:58	34.96	31.23	25.3	36.46
00:16:59	34.95	31.2	25.31	36.45
00:17:00	34.95	31.06	25.3	36.45
00:17:02	34.95	30.99	25.31	36.45
00:17:03	34.95	30.95	25.32	36.45
00:17:04	34.97	30.95	25.32	36.47
00:17:05	34.98	30.92	25.32	36.48
00:17:06	34.97	30.99	25.33	36.47
00:17:07	34.97	31.2	25.35	36.47
00:17:08	34.97	31.45	25.34	36.47
00:17:09	34.96	31.66	25.35	36.46
00:17:10	34.96	31.84	25.36	36.46
00:17:11	34.97	31.98	25.35	36.47
00:17:12	34.97	32.12	25.36	36.47
00:17:13	34.96	32.19	25.36	36.46
00:17:14	34.96	32.19	25.37	36.46
00:17:15	34.95	32.19	25.38	36.45
00:17:17	34.94	32.23	25.37	36.44
00:17:18	34.94	32.37	25.38	36.44
00:17:19	34.95	32.47	25.4	36.45
00:17:20	34.95	32.61	25.4	36.45
00:17:21	34.96	32.69	25.4	36.46
00:17:22	34.97	32.79	25.41	36.47
00:17:23	34.97	32.9	25.41	36.47
00:17:24	34.97	32.97	25.42	36.47
00:17:25	34.97	33	25.44	36.47
00:17:26	34.97	32.93	25.42	36.47
00:17:27	34.97	32.86	25.42	36.47
00:17:28	34.97	32.76	25.45	36.47
00:17:29	34.98	32.65	25.44	36.48
00:17:30	34.97	32.62	25.45	36.47
00:17:31	34.96	32.55	25.44	36.46
00:17:33	34.96	32.34	25.45	36.46
00:17:34	34.96	32.2	25.46	36.46
00:17:35	34.96	32.06	25.46	36.46
00:17:36	34.97	31.92	25.47	36.47
00:17:37	34.98	31.85	25.47	36.48
00:17:38	34.98	31.49	25.47	36.48
00:17:39	34.98	31.07	25.46	36.48
00:17:40	34.98	31.07	25.48	36.48
00:17:41	34.96	31.14	25.48	36.46
00:17:42	34.96	31.14	25.49	36.46
00:17:43	34.97	31	25.49	36.47
00:17:44	34.97	30.93	25.49	36.47
00:17:45	34.98	30.86	25.5	36.48
00:17:46	34.99	30.83	25.5	36.49
00:17:48	34.99	30.86	25.52	36.49
00:17:49	34.98	30.93	25.5	36.48
00:17:50	34.97	30.93	25.52	36.47
00:17:51	34.96	30.97	25.52	36.46
00:17:52	34.95	31	25.52	36.45
00:17:53	34.95	31.08	25.52	36.45
00:17:54	34.94	31.15	25.53	36.44
00:17:55	34.94	31.36	25.53	36.44
00:17:56	34.94	31.32	25.54	36.44
00:17:57	34.93	31.15	25.53	36.43
00:17:58	34.94	31.08	25.54	36.44
00:17:59	34.95	31.18	25.54	36.45
00:18:00	34.95	31.32	25.54	36.45
00:18:01	34.96	31.5	25.56	36.46
00:18:02	34.97	31.57	25.56	36.47
00:18:04	34.96	31.57	25.56	36.46
00:18:05	34.94	31.43	25.56	36.44
00:18:06	34.95	31.4	25.56	36.45
00:18:07	34.95	31.22	25.57	36.45
00:18:08	34.95	31.15	25.57	36.45
00:18:09	34.95	31.15	25.58	36.45
00:18:10	34.97	31.22	25.58	36.47
00:18:11	34.97	31.26	25.58	36.47
00:18:12	34.96	31.29	25.59	36.46
00:18:13	34.95	31.36	25.59	36.45
00:18:14	34.95	31.43	25.6	36.45
00:18:15	34.95	31.51	25.6	36.45
00:18:16	34.96	31.58	25.61	36.46
00:18:17	34.97	31.65	25.61	36.47
00:18:19	34.98	31.72	25.61	36.48
00:18:20	34.97	31.72	25.62	36.47
00:18:21	34.96	31.65	25.63	36.46
00:18:22	34.96	31.47	25.64	36.46
00:18:23	34.95	31.4	25.63	36.45
00:18:24	34.94	31.3	25.64	36.44
00:18:25	34.95	31.19	25.64	36.45
00:18:26	34.95	31.23	25.64	36.45
00:18:27	34.94	31.3	25.65	36.44
00:18:28	34.96	31.3	25.64	36.46
00:18:29	34.95	31.3	25.66	36.45
00:18:30	34.96	31.37	25.65	36.46
00:18:31	34.97	31.44	25.66	36.47
00:18:32	34.97	31.58	25.68	36.47
00:18:33	34.97	31.65	25.66	36.47
00:18:35	34.98	31.69	25.66	36.48
00:18:36	34.97	31.72	25.68	36.47
00:18:37	34.97	31.72	25.68	36.47
00:18:38	34.96	31.73	25.69	36.46
00:18:39	34.96	31.65	25.7	36.46
00:18:40	34.95	31.58	25.69	36.45
00:18:41	34.96	31.51	25.7	36.46
00:18:42	34.96	31.51	25.7	36.46
00:18:43	34.96	31.44	25.7	36.46
00:18:44	34.96	31.3	25.72	36.46
00:18:45	34.96	31.27	25.72	36.46
00:18:46	34.96	31.3	25.72	36.46
00:18:47	34.98	31.34	25.71	36.48
00:18:48	34.98	31.38	25.72	36.48
00:18:50	34.99	31.37	25.72	36.49
00:18:51	35	31.38	25.73	36.5
00:18:52	35	31.34	25.74	36.5
00:18:53	34.99	31.23	25.73	36.49
00:18:54	35	31.24	25.74	36.5
00:18:55	35.01	31.24	25.76	36.51
00:18:56	35	31.24	25.74	36.5
00:18:57	35	31.24	25.75	36.5
00:18:58	35.01	31.2	25.76	36.51
00:18:59	34.97	31.1	25.76	36.47
00:19:00	34.98	31.1	25.76	36.48
00:19:01	34.99	31.13	25.76	36.49
00:19:02	34.99	31.13	25.76	36.49
00:19:03	35.01	31.1	25.77	36.51
00:19:04	35.03	31.03	25.78	36.53
00:19:06	35.03	30.85	25.78	36.53
00:19:07	35.03	30.78	25.78	36.53
00:19:08	35.03	30.74	25.77	36.53
00:19:09	35.03	30.74	25.8	36.53
00:19:10	35.03	30.78	25.78	36.53
00:19:11	35.02	30.89	25.8	36.52
00:19:12	35.02	30.96	25.8	36.52
00:19:13	35.02	30.99	25.8	36.52
00:19:14	35.02	31.06	25.81	36.52
00:19:15	35.02	31.21	25.82	36.52
00:19:16	35.02	31.31	25.82	36.52
00:19:17	35.01	31.38	25.82	36.51
00:19:18	35.01	31.45	25.82	36.51
00:19:19	35.01	31.45	25.83	36.51
00:19:21	35.02	31.46	25.84	36.52
00:19:22	35.02	31.46	25.84	36.52
00:19:23	35.03	31.49	25.84	36.53
00:19:24	35.03	31.53	25.84	36.53
00:19:25	35.03	31.53	25.84	36.53
00:19:26	35.03	31.56	25.85	36.53
00:19:27	35.03	31.6	25.86	36.53
00:19:28	35.03	31.6	25.87	36.53
00:19:29	35.03	31.53	25.87	36.53
00:19:30	35.04	31.39	25.87	36.54
00:19:31	35.05	31.39	25.87	36.55
00:19:32	35.05	31.46	25.88	36.55
00:19:33	35.05	31.56	25.88	36.55
00:19:34	35.05	31.67	25.88	36.55
00:19:35	35.03	31.71	25.9	36.53
00:19:37	35.03	31.6	25.9	36.53
00:19:38	35.02	31.57	25.9	36.52
00:19:39	35.02	31.46	25.91	36.52
00:19:40	35.02	31.39	25.9	36.52
00:19:41	35.04	31.25	25.92	36.54
00:19:42	35.03	31.25	25.92	36.53
00:19:43	35.03	31.25	25.92	36.53
00:19:44	35.03	31.18	25.92	36.53
00:19:45	35.01	31.18	25.92	36.51
00:19:46	35.01	31.04	25.93	36.51
00:19:47	35.03	30.93	25.93	36.53
00:19:48	35.02	30.9	25.94	36.52
00:19:49	35.03	30.9	25.94	36.53
00:19:50	35.02	31.04	25.94	36.52
00:19:52	35.02	31.04	25.94	36.52
00:19:53	35.01	30.97	25.94	36.51
00:19:54	35.02	31.04	25.95	36.52
00:19:55	35.02	31.04	25.95	36.52
00:19:56	35.02	31.04	25.96	36.52
00:19:57	35.02	31.11	25.96	36.52
00:19:58	35.03	31.11	25.96	36.53
00:19:59	35.02	31.08	25.96	36.52
00:20:00	35.04	30.97	25.97	36.54
00:20:01	35.03	30.9	25.97	36.53
00:20:02	35.02	30.83	25.97	36.52
00:20:03	35.02	30.69	25.96	36.52
00:20:04	35.03	30.79	25.97	36.53
00:20:05	35.01	30.76	25.97	36.51
00:20:06	35.03	30.72	25.98	36.53
00:20:08	35.04	30.83	26	36.54
00:20:09	35.04	30.94	26	36.54
00:20:10	35.03	30.97	25.99	36.53
00:20:11	35.05	30.94	26	36.55
00:20:12	35.04	30.55	25.99	36.54
00:20:13	35.03	30.41	26	36.53
00:20:14	35.04	30.33	26	36.54
00:20:15	35.04	30.34	26	36.54
00:20:16	35.04	30.37	26	36.54
00:20:17	35.06	30.48	26.02	36.56
00:20:18	35.05	30.55	26.02	36.55
00:20:19	35.06	30.59	26.03	36.56
00:20:20	35.04	30.62	26.02	36.54
00:20:21	35.02	30.58	26.02	36.52
00:20:23	35.02	30.62	26.02	36.52
00:20:24	35.02	30.62	26.03	36.52
00:20:25	35.01	30.62	26.03	36.51
00:20:26	35.01	30.55	26.04	36.51
00:20:27	35.02	30.69	26.04	36.52
00:20:28	35.01	30.55	26.04	36.51
00:20:29	35.01	30.37	26.04	36.51
00:20:30	35.01	30.2	26.03	36.51
00:20:31	35.02	30.05	26.04	36.52
00:20:32	35.03	29.91	26.04	36.53
00:20:33	35.02	29.98	26.04	36.52
00:20:34	35.02	30.05	26.04	36.52
00:20:35	35.02	30.02	26.05	36.52
00:20:36	35.02	30.02	26.06	36.52
00:20:37	35.02	29.95	26.06	36.52
00:20:39	35.03	29.91	26.06	36.53
00:20:40	35.02	29.91	26.06	36.52
00:20:41	35.02	30.06	26.06	36.52
00:20:42	35.02	30.27	26.07	36.52
00:20:43	35.01	30.2	26.06	36.51
00:20:44	35.01	30.34	26.06	36.51
00:20:45	35.02	30.2	26.08	36.52
00:20:46	35	30.06	26.08	36.5
00:20:47	35	29.99	26.08	36.5
00:20:48	35	29.91	26.07	36.5
00:20:49	35	29.77	26.08	36.5
00:20:50	35.02	29.63	26.07	36.52
00:20:51	35.01	29.56	26.07	36.51
00:20:53	35.01	29.63	26.08	36.51
00:20:54	35.01	29.56	26.08	36.51
00:20:55	35.01	29.52	26.08	36.51
00:20:56	35	29.49	26.08	36.5
00:20:57	35	29.52	26.09	36.5
00:20:58	35	29.7	26.09	36.5
00:20:59	35	29.7	26.09	36.5
00:21:00	35	29.63	26.1	36.5
00:21:01	35.01	29.74	26.08	36.51
00:21:02	35.02	29.84	26.09	36.52
00:21:03	35.02	29.84	26.09	36.52
00:21:04	35.02	29.92	26.1	36.52
00:21:05	35.02	29.85	26.1	36.52
00:21:06	35.02	29.85	26.1	36.52
00:21:08	35.02	29.81	26.1	36.52
00:21:09	35.01	29.7	26.1	36.51
00:21:10	35.01	29.77	26.11	36.51
00:21:11	35.01	29.7	26.1	36.51
00:21:12	35.01	29.77	26.1	36.51
00:21:13	35.01	29.92	26.1	36.51
00:21:14	35.01	29.99	26.11	36.51
00:21:15	35.01	29.95	26.1	36.51
00:21:16	35.01	29.92	26.12	36.51
00:21:17	35.01	29.92	26.11	36.51
00:21:18	35.02	29.99	26.12	36.52
00:21:19	35.02	30.1	26.11	36.52
00:21:20	35.03	30.2	26.12	36.53
00:21:21	35.03	30.13	26.12	36.53
00:21:23	35.03	30.13	26.13	36.53
00:21:24	35.02	30.13	26.14	36.52
00:21:25	35.01	30.17	26.13	36.51
00:21:26	35.01	29.99	26.13	36.51
00:21:27	35.01	30.2	26.13	36.51
00:21:28	35	30.49	26.14	36.5
00:21:29	35	30.7	26.14	36.5
00:21:30	35.01	30.77	26.14	36.51
00:21:31	35	30.7	26.16	36.5
00:21:32	35	30.63	26.16	36.5
00:21:33	34.99	30.49	26.15	36.49
00:21:34	34.99	30.42	26.16	36.49
00:21:35	34.99	30.31	26.16	36.49
00:21:37	35	30.49	26.17	36.5
00:21:38	35	30.42	26.16	36.5
00:21:39	35.01	30.28	26.15	36.51
00:21:40	35	30.35	26.17	36.5
00:21:41	35	30.35	26.17	36.5
00:21:42	35	30.49	26.17	36.5
00:21:43	35.01	30.49	26.18	36.51
00:21:44	35.02	30.53	26.18	36.52
00:21:45	35.02	30.6	26.18	36.52
00:21:46	35.02	30.71	26.18	36.52
00:21:47	35.02	30.53	26.19	36.52
00:21:48	35.02	30.49	26.19	36.52
00:21:49	35.02	30.49	26.19	36.52
00:21:50	35.02	30.64	26.19	36.52
00:21:52	35.01	30.78	26.2	36.51
00:21:53	35.01	30.78	26.2	36.51
00:21:54	35	30.63	26.2	36.5
00:21:55	35.01	30.56	26.2	36.51
00:21:56	34.99	30.64	26.2	36.49
00:21:57	34.98	30.78	26.22	36.48
00:21:58	34.97	30.74	26.22	36.47
00:21:59	34.98	30.64	26.22	36.48
00:22:00	34.98	30.49	26.22	36.48
00:22:01	34.99	30.42	26.22	36.49
00:22:02	34.99	30.42	26.22	36.49
00:22:03	34.98	30.57	26.22	36.48
00:22:04	34.99	30.67	26.23	36.49
00:22:06	35	30.71	26.23	36.5
00:22:07	35	30.64	26.23	36.5
00:22:08	35.01	30.43	26.24	36.51
00:22:09	35.01	30.28	26.24	36.51
00:22:10	35.01	30.28	26.25	36.51
00:22:11	35.01	30.28	26.23	36.51
00:22:12	35.02	30.28	26.24	36.52
00:22:13	35.02	30.35	26.24	36.52
00:22:14	35.03	30.35	26.24	36.53
00:22:15	35.03	30.35	26.24	36.53
00:22:16	35.03	30.28	26.24	36.53
00:22:17	35.02	30.11	26.24	36.52
00:22:18	35.02	29.93	26.25	36.52
00:22:19	35.02	29.93	26.25	36.52
00:22:21	35.01	30	26.25	36.51
00:22:22	35	29.93	26.26	36.5
00:22:23	35.01	30.07	26.25	36.51
00:22:24	35	30.29	26.26	36.5
00:22:25	35	30.43	26.27	36.5
00:22:26	35	30.43	26.27	36.5
00:22:27	35.01	30.5	26.27	36.51
00:22:28	35.01	30.5	26.28	36.51
00:22:29	35	30.57	26.29	36.5
00:22:30	35	30.53	26.28	36.5
00:22:31	35	30.29	26.28	36.5
00:22:32	35	30.18	26.28	36.5
00:22:33	35.02	30.07	26.28	36.52
00:22:35	35.02	30.11	26.3	36.52
00:22:36	35.03	30.15	26.29	36.53
00:22:37	35.02	30.18	26.3	36.52
00:22:38	35.02	30.15	26.31	36.52
00:22:39	35.01	30.07	26.3	36.51
00:22:40	35.01	30.07	26.3	36.51
00:22:41	35.02	30.08	26.3	36.52
00:22:42	35.03	30.15	26.3	36.53
00:22:43	35.03	30.29	26.31	36.53
00:22:44	35.03	30.36	26.31	36.53
00:22:45	35.03	30.43	26.32	36.53
00:22:46	35.02	30.43	26.31	36.52
00:22:47	35.02	30.43	26.32	36.52
00:22:48	35.02	30.22	26.32	36.52
00:22:50	35.01	30.11	26.32	36.51
00:22:51	35.01	30.22	26.33	36.51
00:22:52	35	30.36	26.33	36.5
00:22:53	35	30.43	26.33	36.5
00:22:54	35.01	30.43	26.32	36.51
00:22:55	35	30.33	26.32	36.5
00:22:56	35	30.25	26.33	36.5
00:22:57	35.01	30.01	26.33	36.51
00:22:58	35	29.79	26.33	36.5
00:22:59	35	29.72	26.33	36.5
00:23:00	35	29.72	26.34	36.5
00:23:01	35.01	29.65	26.34	36.51
00:23:02	35.02	29.62	26.34	36.52
00:23:04	35.02	29.72	26.35	36.52
00:23:05	35.02	29.79	26.36	36.52
00:23:06	35.02	29.79	26.35	36.52
00:23:07	35.02	29.87	26.35	36.52
00:23:08	35.01	29.94	26.36	36.51
00:23:09	35.02	30.01	26.35	36.52
00:23:10	35.02	30.01	26.36	36.52
00:23:11	35.01	30.05	26.37	36.51
00:23:12	35.01	30.15	26.37	36.51
00:23:13	35.01	30.22	26.38	36.51
00:23:14	35	30.22	26.37	36.5
00:23:15	35.02	30.29	26.37	36.52
00:23:16	35.02	30.33	26.36	36.52
00:23:17	35.02	30.4	26.38	36.52
00:23:19	35.03	30.29	26.38	36.53
00:23:20	35.04	30.29	26.38	36.54
00:23:21	35.02	30.26	26.39	36.52
00:23:22	35.02	30.19	26.38	36.52
00:23:23	35.02	30.19	26.38	36.52
00:23:24	35.02	30.22	26.4	36.52
00:23:25	35.02	30.01	26.39	36.52
00:23:26	35.03	29.73	26.4	36.53
00:23:27	35.04	29.65	26.4	36.54
00:23:28	35.03	29.69	26.39	36.53
00:23:29	35.03	29.73	26.4	36.53
00:23:30	35.03	29.83	26.4	36.53
00:23:31	35.02	29.8	26.41	36.52
00:23:32	35.03	29.76	26.41	36.53
00:23:34	35.03	29.8	26.4	36.53
00:23:35	35.02	29.87	26.42	36.52
00:23:36	35.02	29.91	26.42	36.52
00:23:37	35.02	29.94	26.41	36.52
00:23:38	35.02	29.91	26.41	36.52
00:23:39	35.01	29.87	26.41	36.51
00:23:40	35.02	29.66	26.42	36.52
00:23:41	35.01	29.59	26.41	36.51
00:23:42	35	29.59	26.41	36.5
00:23:43	35.01	29.51	26.42	36.51
00:23:44	35.01	29.41	26.42	36.51
00:23:45	35.03	29.44	26.42	36.53
00:23:46	35.03	29.44	26.43	36.53
00:23:48	35.03	29.59	26.42	36.53
00:23:49	35.03	29.59	26.43	36.53
00:23:50	35.03	29.66	26.43	36.53
00:23:51	35.02	29.59	26.43	36.52
00:23:52	35.02	29.73	26.44	36.52
00:23:53	35.02	29.73	26.43	36.52
00:23:54	35.02	29.66	26.43	36.52
00:23:55	35.02	29.44	26.44	36.52
00:23:56	35.03	29.09	26.43	36.53
00:23:57	35.03	28.51	26.44	36.53
00:23:58	35.03	28.23	26.44	36.53
00:23:59	35.02	28.23	26.43	36.52
00:24:00	35.02	28.3	26.44	36.52
00:24:01	35.02	28.23	26.44	36.52
00:24:03	35.01	28.23	26.44	36.51
00:24:04	35	28.23	26.45	36.5
00:24:05	35	28.3	26.45	36.5
00:24:06	34.99	28.44	26.45	36.49
00:24:07	34.97	28.87	26.46	36.47
00:24:08	34.97	29.59	26.44	36.47
00:24:09	34.97	29.73	26.45	36.47
00:24:10	34.97	29.59	26.44	36.47
00:24:11	34.97	29.3	26.44	36.47
00:24:12	34.97	29.02	26.44	36.47
00:24:13	34.97	29.02	26.44	36.47
00:24:14	34.97	29.02	26.45	36.47
00:24:15	34.98	28.87	26.45	36.48
00:24:16	34.98	28.91	26.44	36.48
00:24:18	34.98	28.87	26.46	36.48
00:24:19	34.98	28.8	26.46	36.48
00:24:20	34.97	28.8	26.46	36.47
00:24:21	34.97	28.87	26.45	36.47
00:24:22	34.96	28.77	26.45	36.46
00:24:23	34.96	28.37	26.44	36.46
00:24:24	34.96	28.01	26.45	36.46
00:24:25	34.95	28.08	26.46	36.45
00:24:26	34.94	28.08	26.44	36.44
00:24:27	34.94	28.12	26.45	36.44
00:24:28	34.94	28.12	26.46	36.44
00:24:29	34.94	28.08	26.46	36.44
00:24:30	34.94	28.09	26.45	36.44
00:24:32	34.95	28.19	26.46	36.45
00:24:33	34.94	28.3	26.46	36.44
00:24:34	34.92	28.41	26.46	36.42
00:24:35	34.93	28.52	26.47	36.43
00:24:36	34.92	28.55	26.46	36.42
00:24:37	34.92	28.59	26.47	36.42
00:24:38	34.92	28.52	26.47	36.42
00:24:39	34.93	28.37	26.47	36.43
00:24:40	34.92	28.34	26.48	36.42
00:24:41	34.91	28.23	26.47	36.41
00:24:42	34.9	28.23	26.46	36.4
00:24:43	34.89	28.01	26.47	36.39
00:24:44	34.88	27.76	26.46	36.38
00:24:45	34.88	27.65	26.47	36.38
00:24:47	34.86	27.51	26.45	36.36
00:24:48	34.85	27.65	26.47	36.35
00:24:49	34.84	27.8	26.46	36.34
00:24:50	34.84	27.87	26.47	36.34
00:24:51	34.84	28.16	26.46	36.34
00:24:52	34.84	28.37	26.46	36.34
00:24:53	34.83	28.44	26.46	36.33
00:24:54	34.82	28.52	26.46	36.32
00:24:55	34.8	28.59	26.46	36.3
00:24:56	34.79	28.44	26.46	36.29
00:24:57	34.78	28.48	26.46	36.28
00:24:58	34.76	28.44	26.47	36.26
00:24:59	34.75	28.8	26.47	36.25
00:25:01	34.74	29.16	26.46	36.24
00:25:02	34.72	28.84	26.46	36.22
00:25:03	34.71	28.44	26.45	36.21
00:25:04	34.72	28.16	26.46	36.22
00:25:05	34.7	28.08	26.45	36.2
00:25:06	34.7	27.94	26.45	36.2
00:25:07	34.7	27.9	26.45	36.2
00:25:08	34.69	27.8	26.45	36.19
00:25:09	34.69	27.58	26.46	36.19
00:25:10	34.7	27.36	26.45	36.2
00:25:11	34.71	27.18	26.44	36.21
00:25:12	34.71	27	26.44	36.21
00:25:13	34.7	26.86	26.43	36.2
00:25:14	34.68	26.71	26.42	36.18
00:25:16	34.67	26.57	26.42	36.17
00:25:17	34.65	26.49	26.41	36.15
00:25:18	34.64	26.31	26.41	36.14
00:25:19	34.63	26.28	26.41	36.13
00:25:20	34.62	26.28	26.41	36.12
00:25:21	34.6	26.17	26.4	36.1
00:25:22	34.6	26.06	26.4	36.1
00:25:23	34.59	25.99	26.4	36.09
00:25:24	34.59	26.24	26.4	36.09
00:25:25	34.57	26.86	26.4	36.07
00:25:26	34.55	27.47	26.4	36.05
00:25:27	34.55	27.65	26.4	36.05
00:25:28	34.54	27.4	26.39	36.04
00:25:29	34.55	26.78	26.38	36.05
00:25:31	34.56	26.13	26.37	36.06
00:25:32	34.56	25.91	26.37	36.06
00:25:33	34.54	25.98	26.36	36.04
00:25:34	34.55	26.06	26.35	36.05
00:25:35	34.53	26.17	26.34	36.03
00:25:36	34.52	26.24	26.35	36.02
00:25:37	34.51	26.27	26.34	36.01
00:25:38	34.52	26.2	26.36	36.02
00:25:39	34.53	26.2	26.35	36.03
00:25:40	34.52	26.05	26.33	36.02
00:25:41	34.53	26.06	26.34	36.03
00:25:42	34.53	25.98	26.32	36.03
00:25:43	34.52	25.73	26.32	36.02
00:25:45	34.52	25.47	26.31	36.02
00:25:46	34.52	25.44	26.32	36.02
00:25:47	34.5	25.4	26.32	36
00:25:48	34.48	25.51	26.3	35.98
00:25:49	34.49	25.62	26.32	35.99
00:25:50	34.48	25.76	26.31	35.98
00:25:51	34.47	25.84	26.31	35.97
00:25:52	34.47	25.98	26.32	35.97
00:25:53	34.48	26.2	26.32	35.98
00:25:54	34.46	26.27	26.32	35.96
00:25:55	34.47	26.05	26.3	35.97
00:25:56	34.47	25.8	26.28	35.97
00:25:57	34.46	25.76	26.3	35.96
00:25:58	34.45	25.91	26.3	35.95
00:26:00	34.45	25.91	26.3	35.95
00:26:01	34.43	26.34	26.3	35.93
00:26:02	34.41	26.41	26.3	35.91
00:26:03	34.4	26.34	26.29	35.9
00:26:04	34.41	26.05	26.3	35.91
00:26:05	34.4	25.76	26.29	35.9
00:26:06	34.4	25.4	26.27	35.9
00:26:07	34.41	25.11	26.27	35.91
00:26:08	34.39	24.85	26.25	35.89
00:26:09	34.38	24.67	26.24	35.88
00:26:10	34.37	24.6	26.23	35.87
00:26:11	34.37	24.63	26.24	35.87
00:26:12	34.38	24.96	26.24	35.88
00:26:14	34.39	25.32	26.25	35.89
00:26:15	34.39	25.76	26.24	35.89
00:26:16	34.4	25.76	26.25	35.9
00:26:17	34.39	25.9	26.24	35.89
00:26:18	34.39	25.76	26.23	35.89
00:26:19	34.38	25.39	26.22	35.88
00:26:20	34.38	25.1	26.2	35.88
00:26:21	34.37	24.88	26.18	35.87
00:26:22	34.37	24.66	26.16	35.87
00:26:23	34.35	24.52	26.15	35.85
00:26:24	34.35	24.41	26.13	35.85
00:26:25	34.34	24.48	26.15	35.84
00:26:26	34.33	24.66	26.15	35.83
00:26:27	34.32	25.03	26.14	35.82
00:26:29	34.31	25.24	26.14	35.81
00:26:30	34.3	25.61	26.15	35.8
00:26:31	34.29	26.04	26.16	35.79
00:26:32	34.28	26.51	26.16	35.78
00:26:33	34.27	27.06	26.18	35.77
00:26:34	34.27	27.52	26.18	35.77
00:26:35	34.25	27.6	26.18	35.75
00:26:36	34.26	27.7	26.18	35.76
00:26:37	34.27	27.56	26.18	35.77
00:26:38	34.26	27.27	26.19	35.76
00:26:39	34.26	27.06	26.19	35.76
00:26:40	34.25	26.77	26.19	35.75
00:26:41	34.25	26.59	26.19	35.75
00:26:43	34.26	26.52	26.19	35.76
00:26:44	34.26	26.59	26.19	35.76
00:26:45	34.28	26.59	26.18	35.78
00:26:46	34.28	26.62	26.19	35.78
00:26:47	34.28	26.4	26.18	35.78
00:26:48	34.28	26.19	26.16	35.78
00:26:49	34.28	25.97	26.16	35.78
00:26:50	34.27	25.79	26.16	35.77
00:26:51	34.26	25.75	26.16	35.76
00:26:52	34.23	25.97	26.15	35.73
00:26:53	34.23	26.19	26.16	35.73
00:26:54	34.21	26.22	26.15	35.71
00:26:55	34.2	26.33	26.16	35.7
00:26:56	34.19	26.4	26.16	35.69
00:26:58	34.19	26.4	26.16	35.69
00:26:59	34.19	26.19	26.16	35.69
00:27:00	34.2	26.04	26.16	35.7
00:27:01	34.19	26.19	26.16	35.69
00:27:02	34.19	26.26	26.15	35.69
00:27:03	34.2	26.4	26.16	35.7
00:27:04	34.19	26.55	26.16	35.69
00:27:05	34.18	26.55	26.16	35.68
00:27:06	34.19	26.55	26.17	35.69
00:27:07	34.19	26.55	26.16	35.69
00:27:08	34.18	26.77	26.16	35.68
00:27:09	34.18	26.91	26.18	35.68
00:27:10	34.18	27.02	26.17	35.68
00:27:11	34.19	26.66	26.17	35.69
00:27:13	34.19	26.26	26.14	35.69
00:27:14	34.19	25.82	26.14	35.69
00:27:15	34.18	25.35	26.12	35.68
00:27:16	34.18	24.88	26.1	35.68
00:27:17	34.17	24.58	26.09	35.67
00:27:18	34.15	24.8	26.07	35.65
00:27:19	34.15	25.09	26.08	35.65
00:27:20	34.15	25.24	26.09	35.65
00:27:21	34.14	25.31	26.07	35.64
00:27:22	34.13	25.38	26.08	35.63
00:27:23	34.14	25.64	26.07	35.64
00:27:24	34.13	26	26.08	35.63
00:27:25	34.13	26.9	26.09	35.63
00:27:27	34.12	27.91	26.08	35.62
00:27:28	34.14	28.13	26.08	35.64
00:27:29	34.13	28.2	26.09	35.63
00:27:30	34.13	28.27	26.1	35.63
00:27:31	34.12	28.16	26.1	35.62
00:27:32	34.13	28.09	26.1	35.63
00:27:33	34.11	27.98	26.1	35.61
00:27:34	34.1	27.77	26.09	35.6
00:27:35	34.1	27.48	26.08	35.6
00:27:36	34.09	27.27	26.09	35.59
00:27:37	34.09	27.01	26.09	35.59
00:27:38	34.09	26.87	26.09	35.59
00:27:39	34.09	26.8	26.08	35.59
00:27:40	34.11	26.76	26.09	35.61
00:27:42	34.12	26.83	26.09	35.62
00:27:43	34.13	27.01	26.1	35.63
00:27:44	34.14	27.12	26.09	35.64
00:27:45	34.15	27.19	26.1	35.65
00:27:46	34.15	26.98	26.09	35.65
00:27:47	34.15	26.87	26.08	35.65
00:27:48	34.16	26.83	26.09	35.66
00:27:49	34.17	26.65	26.1	35.67
00:27:50	34.18	26.54	26.09	35.68
00:27:51	34.18	26.58	26.08	35.68
00:27:52	34.18	26.62	26.08	35.68
00:27:53	34.18	26.69	26.08	35.68
00:27:54	34.18	26.69	26.08	35.68
00:27:55	34.18	26.83	26.09	35.68
00:27:57	34.19	26.83	26.08	35.69
00:27:58	34.2	26.83	26.08	35.7
00:27:59	34.22	26.83	26.08	35.72
00:28:00	34.23	26.79	26.08	35.73
00:28:01	34.25	26.76	26.08	35.75
00:28:02	34.24	26.87	26.08	35.74
00:28:03	34.24	26.9	26.08	35.74
00:28:04	34.23	27.16	26.08	35.73
00:28:05	34.22	27.26	26.07	35.72
00:28:06	34.23	27.16	26.06	35.73
00:28:07	34.23	26.79	26.05	35.73
00:28:08	34.23	26.4	26.04	35.73
00:28:09	34.23	26.14	26.04	35.73
00:28:11	34.23	26.03	26.03	35.73
00:28:12	34.23	26.11	26.04	35.73
00:28:13	34.23	26.25	26.04	35.73
00:28:14	34.23	26.32	26.04	35.73
00:28:15	34.24	26.54	26.04	35.74
00:28:16	34.24	26.68	26.04	35.74
00:28:17	34.24	26.83	26.04	35.74
00:28:18	34.25	26.83	26.05	35.75
00:28:19	34.25	26.76	26.05	35.75
00:28:20	34.24	26.72	26.05	35.74
00:28:21	34.23	26.83	26.05	35.73
00:28:22	34.21	27.01	26.04	35.71
00:28:23	34.2	27.12	26.05	35.7
00:28:24	34.2	27.12	26.04	35.7
00:28:26	34.2	27.23	26.04	35.7
00:28:27	34.21	27.19	26.03	35.71
00:28:28	34.22	27.26	26.04	35.72
00:28:29	34.22	27.33	26.05	35.72
00:28:30	34.22	27.33	26.03	35.72
00:28:31	34.22	27.37	26.04	35.72
00:28:32	34.21	27.59	26.05	35.71
00:28:33	34.2	27.62	26.04	35.7
00:28:34	34.2	27.55	26.05	35.7
00:28:35	34.16	27.48	26.06	35.66
00:28:36	34.15	27.48	26.04	35.65
00:28:37	34.15	27.41	26.05	35.65
00:28:38	34.14	27.41	26.05	35.64
00:28:40	34.14	27.41	26.05	35.64
00:28:41	34.15	27.44	26.04	35.65
00:28:42	34.16	27.48	26.04	35.66
00:28:43	34.18	27.62	26.04	35.68
00:28:44	34.19	27.84	26.04	35.69
00:28:45	34.21	27.91	26.05	35.71
00:28:46	34.21	27.91	26.05	35.71
00:28:47	34.2	27.91	26.05	35.7
00:28:48	34.2	27.91	26.05	35.7
00:28:49	34.21	27.77	26.05	35.71
00:28:50	34.22	27.8	26.05	35.72
00:28:51	34.24	27.77	26.05	35.74
00:28:52	34.24	27.73	26.06	35.74
00:28:53	34.24	27.73	26.05	35.74
00:28:55	34.25	27.73	26.06	35.75
00:28:56	34.26	27.69	26.06	35.76
00:28:57	34.25	27.69	26.06	35.75
00:28:58	34.25	27.66	26.06	35.75
00:28:59	34.25	27.51	26.05	35.75
00:29:00	34.25	27.62	26.05	35.75
00:29:01	34.25	27.69	26.05	35.75
00:29:02	34.25	27.69	26.04	35.75
00:29:03	34.24	27.62	26.04	35.74
00:29:04	34.26	27.66	26.04	35.76
00:29:05	34.27	27.66	26.02	35.77
00:29:06	34.27	27.73	26.04	35.77
00:29:07	34.27	27.76	26.04	35.77
00:29:09	34.26	27.62	26.04	35.76
00:29:10	34.26	27.33	26.04	35.76
00:29:11	34.25	26.86	26.03	35.75
00:29:12	34.26	26.9	26.02	35.76
00:29:13	34.26	27.12	26.04	35.76
00:29:14	34.26	27.3	26.03	35.76
00:29:15	34.26	27.33	26.05	35.76
00:29:16	34.27	27.41	26.05	35.77
00:29:17	34.27	27.55	26.05	35.77
00:29:18	34.27	27.62	26.05	35.77
00:29:19	34.26	27.48	26.05	35.76
00:29:20	34.25	27.26	26.04	35.75
00:29:21	34.26	26.83	26.04	35.76
00:29:22	34.28	26.68	26.04	35.78
00:29:24	34.29	26.76	26.05	35.79
00:29:25	34.3	26.83	26.06	35.8
00:29:26	34.32	26.83	26.04	35.82
00:29:27	34.33	26.83	26.05	35.83
00:29:28	34.32	26.94	26.05	35.82
00:29:29	34.31	27.05	26.05	35.81
00:29:30	34.32	26.9	26.05	35.82
00:29:31	34.3	27.05	26.04	35.8
00:29:32	34.29	27.05	26.05	35.79
00:29:33	34.32	27.05	26.05	35.82
00:29:34	34.32	27.19	26.06	35.82
00:29:35	34.36	27.48	26.06	35.86
00:29:36	34.38	27.41	26.06	35.88
00:29:37	34.39	27.23	26.05	35.89
00:29:39	34.4	27.19	26.06	35.9
00:29:40	34.4	27.19	26.06	35.9
00:29:41	34.37	27.33	26.06	35.87
00:29:42	34.35	27.55	26.06	35.85
00:29:43	34.35	27.34	26.08	35.85
00:29:44	34.33	27.34	26.07	35.83
00:29:45	34.33	27.26	26.08	35.83
00:29:46	34.34	27.34	26.06	35.84
00:29:47	34.35	27.44	26.07	35.85
00:29:48	34.36	27.44	26.08	35.86
00:29:49	34.36	27.41	26.07	35.86
00:29:50	34.36	27.41	26.08	35.86
00:29:51	34.35	27.34	26.06	35.85
00:29:53	34.35	27.33	26.07	35.85
00:29:54	34.35	27.34	26.06	35.85
00:29:55	34.36	27.33	26.06	35.86
00:29:56	34.37	27.26	26.06	35.87
00:29:57	34.39	27.3	26.07	35.89
00:29:58	34.41	27.3	26.07	35.91
00:29:59	34.42	27.23	26.06	35.92
00:30:00	34.42	27.19	26.07	35.92
00:30:01	34.42	26.9	26.06	35.92
00:30:02	34.41	26.68	26.04	35.91
00:30:03	34.41	26.65	26.05	35.91
00:30:04	34.4	26.69	26.07	35.9
00:30:05	34.39	26.72	26.06	35.89
00:30:06	34.39	26.97	26.05	35.89
00:30:08	34.38	27.16	26.06	35.88
00:30:09	34.38	27.26	26.06	35.88
00:30:10	34.39	27.26	26.07	35.89
00:30:11	34.39	27.41	26.07	35.89
00:30:12	34.39	27.62	26.06	35.89
00:30:13	34.39	27.77	26.06	35.89
00:30:14	34.38	27.95	26.07	35.88
00:30:15	34.38	28.06	26.08	35.88
00:30:16	34.38	28.13	26.08	35.88
00:30:17	34.37	28.2	26.08	35.87
00:30:18	34.37	28.2	26.08	35.87
00:30:19	34.37	28.34	26.08	35.87
00:30:20	34.37	28.49	26.08	35.87
00:30:21	34.38	28.63	26.08	35.88
00:30:23	34.37	28.77	26.08	35.87
00:30:24	34.37	28.85	26.09	35.87
00:30:25	34.37	28.85	26.09	35.87
00:30:26	34.37	28.77	26.09	35.87
00:30:27	34.36	28.7	26.08	35.86
00:30:28	34.37	28.63	26.09	35.87
00:30:29	34.37	28.63	26.08	35.87
00:30:30	34.37	28.49	26.1	35.87
00:30:31	34.38	28.24	26.1	35.88
00:30:32	34.38	28.13	26.08	35.88
00:30:33	34.38	27.98	26.1	35.88
00:30:34	34.39	27.91	26.1	35.89
00:30:35	34.39	27.91	26.09	35.89
00:30:37	34.37	27.99	26.09	35.87
00:30:38	34.38	28.02	26.09	35.88
00:30:39	34.38	27.91	26.08	35.88
00:30:40	34.37	27.81	26.1	35.87
00:30:41	34.38	27.77	26.1	35.88
00:30:42	34.39	27.77	26.09	35.89
00:30:43	34.39	27.77	26.1	35.89
00:30:44	34.39	27.84	26.11	35.89
00:30:45	34.38	27.91	26.1	35.88
00:30:46	34.37	28.13	26.1	35.87
00:30:47	34.36	28.06	26.11	35.86
00:30:48	34.36	27.77	26.1	35.86
00:30:49	34.37	27.63	26.09	35.87
00:30:50	34.37	27.48	26.1	35.87
00:30:52	34.37	27.12	26.09	35.87
00:30:53	34.37	26.98	26.09	35.87
00:30:54	34.36	26.98	26.09	35.86
00:30:55	34.36	26.98	26.1	35.86
00:30:56	34.36	27.12	26.1	35.86
00:30:57	34.36	27.3	26.11	35.86
00:30:58	34.36	27.45	26.1	35.86
00:30:59	34.36	27.41	26.11	35.86
00:31:00	34.36	27.41	26.09	35.86
00:31:01	34.36	27.48	26.09	35.86
00:31:02	34.38	27.55	26.1	35.88
00:31:03	34.39	27.7	26.09	35.89
00:31:04	34.4	27.8	26.08	35.9
00:31:06	34.4	27.91	26.09	35.9
00:31:07	34.41	27.98	26.09	35.91
00:31:08	34.4	28.06	26.08	35.9
00:31:09	34.39	28.13	26.09	35.89
00:31:10	34.4	28.13	26.09	35.9
00:31:11	34.4	28.2	26.09	35.9
00:31:12	34.39	28.34	26.11	35.89
00:31:13	34.39	28.49	26.11	35.89
00:31:14	34.39	28.56	26.1	35.89
00:31:15	34.38	28.63	26.11	35.88
00:31:16	34.38	28.67	26.12	35.88
00:31:17	34.38	28.7	26.11	35.88
00:31:18	34.38	28.78	26.12	35.88
00:31:19	34.38	28.85	26.12	35.88
00:31:21	34.39	28.85	26.12	35.89
00:31:22	34.41	28.92	26.13	35.91
00:31:23	34.41	29.06	26.12	35.91
00:31:24	34.42	29.17	26.13	35.92
00:31:25	34.42	29.35	26.14	35.92
00:31:26	34.41	29.49	26.13	35.91
00:31:27	34.39	29.63	26.13	35.89
00:31:28	34.38	29.71	26.13	35.88
00:31:29	34.37	29.63	26.14	35.87
00:31:30	34.36	29.49	26.14	35.86
00:31:31	34.36	29.35	26.12	35.86
00:31:32	34.35	29.17	26.14	35.85
00:31:33	34.35	28.95	26.12	35.85
00:31:34	34.35	28.85	26.13	35.85
00:31:36	34.35	28.78	26.13	35.85
00:31:37	34.35	28.78	26.12	35.85
00:31:38	34.36	28.78	26.13	35.86
00:31:39	34.35	28.88	26.13	35.85
00:31:40	34.35	29.03	26.13	35.85
00:31:41	34.34	29.13	26.13	35.84
00:31:42	34.34	29.13	26.14	35.84
00:31:43	34.34	29.13	26.15	35.84
00:31:44	34.34	29.13	26.15	35.84
00:31:45	34.35	29.21	26.14	35.85
00:31:46	34.35	29.13	26.14	35.85
00:31:47	34.35	28.92	26.14	35.85
00:31:48	34.36	28.56	26.14	35.86
00:31:50	34.36	28.28	26.13	35.86
00:31:51	34.35	28.46	26.14	35.85
00:31:52	34.35	28.56	26.14	35.85
00:31:53	34.36	28.35	26.15	35.86
00:31:54	34.36	28.17	26.14	35.86
00:31:55	34.35	28.06	26.15	35.85
00:31:56	34.35	28.13	26.15	35.85
00:31:57	34.34	28.38	26.16	35.84
00:31:58	34.33	28.71	26.16	35.83
00:31:59	34.32	28.89	26.17	35.82
00:32:00	34.33	28.99	26.16	35.83
00:32:01	34.34	28.96	26.17	35.84
00:32:02	34.34	28.53	26.18	35.84
00:32:03	34.34	27.85	26.17	35.84
00:32:05	34.34	27.13	26.16	35.84
00:32:06	34.34	27.34	26.16	35.84
00:32:07	34.33	27.59	26.16	35.83
00:32:08	34.32	27.77	26.16	35.82
00:32:09	34.32	28.06	26.17	35.82
00:32:10	34.32	28.56	26.17	35.82
00:32:11	34.31	29	26.17	35.81
00:32:12	34.31	29.21	26.18	35.81
00:32:13	34.32	29.28	26.19	35.82
00:32:14	34.33	29.28	26.18	35.83
00:32:15	34.33	29	26.18	35.83
00:32:16	34.33	28.75	26.19	35.83
00:32:17	34.32	28.71	26.2	35.82
00:32:19	34.32	28.85	26.2	35.82
00:32:20	34.31	28.89	26.19	35.81
00:32:21	34.31	28.85	26.2	35.81
00:32:22	34.31	28.71	26.2	35.81
00:32:23	34.31	28.78	26.2	35.81
00:32:24	34.31	28.57	26.2	35.81
00:32:25	34.32	28.28	26.21	35.82
00:32:26	34.31	28.07	26.21	35.81
00:32:27	34.31	28.07	26.21	35.81
00:32:28	34.32	28.21	26.22	35.82
00:32:29	34.31	28.21	26.21	35.81
00:32:30	34.32	28.21	26.22	35.82
00:32:31	34.33	28.46	26.22	35.83
00:32:32	34.32	29	26.22	35.82
00:32:34	34.32	29.32	26.22	35.82
00:32:35	34.32	29.43	26.22	35.82
00:32:36	34.32	29.43	26.22	35.82
00:32:37	34.31	29.36	26.22	35.81
00:32:38	34.31	29.07	26.23	35.81
00:32:39	34.32	28.86	26.23	35.82
00:32:40	34.32	28.64	26.23	35.82
00:32:41	34.33	28.21	26.23	35.83
00:32:42	34.34	27.71	26.22	35.84
00:32:43	34.33	27.71	26.24	35.83
00:32:44	34.34	28.21	26.25	35.84
00:32:45	34.33	28.93	26.24	35.83
00:32:46	34.32	29.43	26.24	35.82
00:32:47	34.34	29.71	26.25	35.84
00:32:49	34.35	29.64	26.25	35.85
00:32:50	34.34	29.36	26.24	35.84
00:32:51	34.35	29.14	26.24	35.85
00:32:52	34.36	28.86	26.25	35.86
00:32:53	34.36	28.86	26.24	35.86
00:32:54	34.36	28.96	26.24	35.86
00:32:55	34.37	29.43	26.25	35.87
00:32:56	34.37	29.86	26.25	35.87
00:32:57	34.37	29.82	26.25	35.87
00:32:58	34.36	29.57	26.26	35.86
00:32:59	34.36	29.22	26.26	35.86
00:33:00	34.37	29.22	26.26	35.87
00:33:01	34.37	29.25	26.27	35.87
00:33:03	34.36	29.36	26.27	35.86
00:33:04	34.36	29.43	26.27	35.86
00:33:05	34.36	29.57	26.26	35.86
00:33:06	34.35	29.75	26.27	35.85
00:33:07	34.35	29.72	26.27	35.85
00:33:08	34.36	29.79	26.28	35.86
00:33:09	34.37	30	26.28	35.87
00:33:10	34.37	30.07	26.28	35.87
00:33:11	34.38	29.79	26.29	35.88
00:33:12	34.39	29.57	26.28	35.89
00:33:13	34.39	29.82	26.29	35.89
00:33:14	34.4	30.14	26.28	35.9
00:33:15	34.4	30.22	26.3	35.9
00:33:16	34.4	30.11	26.29	35.9
00:33:18	34.4	29.82	26.3	35.9
00:33:19	34.4	29.22	26.28	35.9
00:33:20	34.4	28.97	26.28	35.9
00:33:21	34.4	28.86	26.29	35.9
00:33:22	34.4	28.86	26.29	35.9
00:33:23	34.4	28.65	26.28	35.9
00:33:24	34.4	28.54	26.28	35.9
00:33:25	34.39	28.47	26.28	35.89
00:33:26	34.39	28.5	26.27	35.89
00:33:27	34.39	28.93	26.27	35.89
00:33:28	34.4	29.07	26.28	35.9
00:33:29	34.41	29.36	26.27	35.91
00:33:30	34.41	29.65	26.28	35.91
00:33:32	34.42	29.82	26.28	35.92
00:33:33	34.42	29.9	26.29	35.92
00:33:34	34.41	29.9	26.29	35.91
00:33:35	34.41	30	26.29	35.91
00:33:36	34.42	29.97	26.3	35.92
00:33:37	34.41	29.79	26.3	35.91
00:33:38	34.41	29.79	26.31	35.91
00:33:39	34.41	29.86	26.31	35.91
00:33:40	34.41	30.15	26.31	35.91
00:33:41	34.39	30.47	26.31	35.89
00:33:42	34.39	30.64	26.31	35.89
00:33:43	34.39	30.79	26.31	35.89
00:33:44	34.39	30.86	26.32	35.89
00:33:45	34.39	30.86	26.32	35.89
00:33:47	34.39	30.72	26.32	35.89
00:33:48	34.38	30.5	26.33	35.88
00:33:49	34.37	30.29	26.34	35.87
00:33:50	34.37	30.04	26.34	35.87
00:33:51	34.37	29.65	26.33	35.87
00:33:52	34.37	29.29	26.34	35.87
00:33:53	34.38	28.94	26.33	35.88
00:33:54	34.39	28.65	26.33	35.89
00:33:55	34.4	28.43	26.34	35.9
00:33:56	34.39	28.15	26.33	35.89
00:33:57	34.39	27.89	26.34	35.89
00:33:58	34.38	27.64	26.32	35.88
00:33:59	34.38	27.36	26.34	35.88
00:34:00	34.38	27.21	26.33	35.88
00:34:02	34.39	27.14	26.34	35.89
00:34:03	34.38	27.14	26.33	35.88
00:34:04	34.38	27.14	26.33	35.88
00:34:05	34.38	27.14	26.33	35.88
00:34:06	34.38	27.14	26.32	35.88
00:34:07	34.37	27.03	26.33	35.87
00:34:08	34.37	26.92	26.33	35.87
00:34:09	34.37	26.92	26.33	35.87
00:34:10	34.36	26.89	26.34	35.86
00:34:11	34.36	27.14	26.34	35.86
00:34:12	34.36	27.25	26.33	35.86
00:34:13	34.36	27.43	26.33	35.86
00:34:14	34.37	27.64	26.34	35.87
00:34:16	34.37	28.08	26.33	35.87
00:34:17	34.38	28.54	26.34	35.88
00:34:18	34.39	28.79	26.34	35.89
00:34:19	34.39	28.94	26.34	35.89
00:34:20	34.39	29.26	26.34	35.89
00:34:21	34.39	29.58	26.35	35.89
00:34:22	34.39	29.94	26.34	35.89
00:34:23	34.39	30.15	26.35	35.89
00:34:24	34.4	30.22	26.35	35.9
00:34:25	34.39	30.22	26.36	35.89
00:34:26	34.39	30.15	26.36	35.89
00:34:27	34.38	30.08	26.34	35.88
00:34:28	34.38	30.01	26.36	35.88
00:34:29	34.38	29.94	26.35	35.88
00:34:31	34.39	29.94	26.35	35.89
00:34:32	34.39	29.94	26.36	35.89
00:34:33	34.39	29.87	26.37	35.89
00:34:34	34.38	29.65	26.37	35.88
00:34:35	34.38	29.65	26.35	35.88
00:34:36	34.38	29.65	26.35	35.88
00:34:37	34.37	29.58	26.36	35.87
00:34:38	34.38	29.58	26.37	35.88
00:34:39	34.39	29.62	26.37	35.89
00:34:40	34.39	29.58	26.37	35.89
00:34:41	34.39	29.44	26.36	35.89
00:34:42	34.38	29.51	26.36	35.88
00:34:43	34.37	29.58	26.37	35.87
00:34:45	34.38	29.55	26.37	35.88
00:34:46	34.38	29.37	26.38	35.88
00:34:47	34.38	29.15	26.37	35.88
00:34:48	34.38	29.08	26.37	35.88
00:34:49	34.38	28.97	26.37	35.88
00:34:50	34.37	28.87	26.37	35.87
00:34:51	34.37	28.79	26.37	35.87
00:34:52	34.37	28.69	26.37	35.87
00:34:53	34.37	28.54	26.37	35.87
00:34:54	34.37	28.44	26.36	35.87
00:34:55	34.37	28.33	26.37	35.87
00:34:56	34.38	28.26	26.37	35.88
00:34:57	34.38	28.22	26.36	35.88
00:34:58	34.39	28.15	26.36	35.89
00:35:00	34.4	28.15	26.36	35.9
00:35:01	34.39	28.22	26.36	35.89
00:35:02	34.38	28.29	26.36	35.88
00:35:03	34.39	28.4	26.37	35.89
00:35:04	34.39	28.65	26.38	35.89
00:35:05	34.38	28.94	26.38	35.88
00:35:06	34.38	29.12	26.37	35.88
00:35:07	34.38	29.37	26.37	35.88
00:35:08	34.38	29.22	26.38	35.88
00:35:09	34.39	28.98	26.39	35.89
00:35:10	34.4	29.08	26.37	35.9
00:35:11	34.42	29.3	26.39	35.92
00:35:12	34.42	29.51	26.39	35.92
00:35:14	34.43	29.58	26.4	35.93
00:35:15	34.43	29.51	26.38	35.93
00:35:16	34.43	29.44	26.38	35.93
00:35:17	34.42	29.3	26.38	35.92
00:35:18	34.41	29.15	26.39	35.91
00:35:19	34.41	29.15	26.39	35.91
00:35:20	34.42	29.16	26.39	35.92
00:35:21	34.42	29.23	26.38	35.92
00:35:22	34.43	29.48	26.4	35.93
00:35:23	34.44	29.58	26.4	35.94
00:35:24	34.44	29.58	26.4	35.94
00:35:25	34.46	29.51	26.4	35.96
00:35:26	34.45	29.3	26.39	35.95
00:35:28	34.45	29.01	26.39	35.95
00:35:29	34.46	28.87	26.4	35.96
00:35:30	34.46	28.87	26.39	35.96
00:35:31	34.44	28.8	26.41	35.94
00:35:32	34.45	28.83	26.41	35.95
00:35:33	34.45	29.01	26.42	35.95
00:35:34	34.44	29.08	26.42	35.94
00:35:35	34.44	29.08	26.42	35.94
[truncated: 2,074 more rows]

## Sheet: 2
Time (h:m:s)	Tc (C)	RH (%)	Ta (C)	Tc (C)	HR (bpm)	Time HR	Correction factor	1
00:00:06	34.76	54.46	24.15	35.76	102	00:00:00
00:00:07	34.75	54.43	24.17	35.75	104	00:00:01
00:00:08	34.75	54.37	24.17	35.75	106	00:00:02
00:00:09	34.76	54.33	24.18	35.76	107	00:00:03
00:00:10	34.75	54.28	24.18	35.75	106	00:00:04
00:00:11	34.75	54.21	24.2	35.75	102	00:00:05
00:00:12	34.75	54.09	24.21	35.75	97	00:00:06
00:00:13	34.75	53.96	24.21	35.75	94	00:00:07
00:00:14	34.75	53.87	24.21	35.75	91	00:00:08
00:00:15	34.74	53.77	24.2	35.74	87	00:00:09
00:00:16	34.74	53.71	24.2	35.74	79	00:00:10
00:00:17	34.74	53.62	24.21	35.74	79	00:00:11
00:00:18	34.73	53.56	24.21	35.73	83	00:00:12
00:00:19	34.72	53.49	24.21	35.72	88	00:00:13
00:00:20	34.73	53.46	24.21	35.73	92	00:00:14
00:00:21	34.72	53.43	24.21	35.72	94	00:00:15
00:00:22	34.71	53.4	24.22	35.71	93	00:00:16
00:00:23	34.71	53.34	24.23	35.71	93	00:00:17
00:00:24	34.71	53.34	24.23	35.71	88	00:00:18
00:00:25	34.72	53.3	24.23	35.72	84	00:00:19
00:00:26	34.72	53.28	24.24	35.72	81	00:00:20
00:00:27	34.72	53.24	24.24	35.72	81	00:00:21
00:00:28	34.71	53.24	24.24	35.71	83	00:00:22
00:00:29	34.71	53.21	24.24	35.71	85	00:00:23
00:00:30	34.7	53.21	24.24	35.7	87	00:00:24
00:00:31	34.7	53.18	24.24	35.7	88	00:00:25
00:00:32	34.7	53.15	24.26	35.7	90	00:00:26
00:00:33	34.7	53.12	24.24	35.7	88	00:00:27
00:00:34	34.7	53.09	24.26	35.7	86	00:00:28
00:00:35	34.69	53.09	24.25	35.69	85	00:00:29
00:00:36	34.68	53.02	24.24	35.68	85	00:00:30
00:00:37	34.67	53.02	24.26	35.67	87	00:00:31
00:00:38	34.67	53.02	24.26	35.67	88	00:00:32
00:00:39	34.66	53.02	24.25	35.66	89	00:00:33
00:00:40	34.66	52.96	24.25	35.66	89	00:00:34
00:00:41	34.66	52.96	24.26	35.66	88	00:00:35
00:00:42	34.66	52.96	24.28	35.66	85	00:00:36
00:00:43	34.66	52.93	24.27	35.66	84	00:00:37
00:00:44	34.66	52.96	24.28	35.66	83	00:00:38
00:00:45	34.66	52.96	24.28	35.66	84	00:00:39
00:00:46	34.66	53.03	24.28	35.66	86	00:00:40
00:00:47	34.66	53.03	24.28	35.66	87	00:00:41
00:00:48	34.66	53.06	24.28	35.66	87	00:00:42
00:00:49	34.66	53.09	24.28	35.66	89	00:00:43
00:00:50	34.66	53.09	24.28	35.66	89	00:00:44
00:00:51	34.65	53.06	24.29	35.65	89	00:00:45
00:00:52	34.65	53.03	24.3	35.65	89	00:00:46
00:00:53	34.65	53	24.31	35.65	90	00:00:47
00:00:54	34.65	52.97	24.3	35.65	91	00:00:48
00:00:55	34.64	52.94	24.29	35.64	92	00:00:49
00:00:56	34.65	52.9	24.31	35.65	92	00:00:50
00:00:57	34.65	52.91	24.32	35.65	92	00:00:51
00:00:58	34.65	52.87	24.31	35.65	92	00:00:52
00:00:59	34.66	52.87	24.32	35.66	91	00:00:53
00:01:00	34.67	52.84	24.32	35.67	91	00:00:54
00:01:01	34.67	52.84	24.32	35.67	92	00:00:55
00:01:02	34.67	52.84	24.33	35.67	93	00:00:56
00:01:03	34.67	52.84	24.32	35.67	96	00:00:57
00:01:04	34.66	52.81	24.32	35.66	98	00:00:58
00:01:05	34.64	52.75	24.32	35.64	99	00:00:59
00:01:06	34.64	52.72	24.34	35.64	100	00:01:00
00:01:07	34.64	52.65	24.32	35.64	100	00:01:01
00:01:08	34.64	52.59	24.33	35.64	99	00:01:02
00:01:09	34.64	52.53	24.33	35.64	97	00:01:03
00:01:10	34.65	52.5	24.33	35.65	97	00:01:04
00:01:11	34.65	52.47	24.33	35.65	99	00:01:05
00:01:12	34.65	52.43	24.33	35.65	99	00:01:06
00:01:13	34.64	52.4	24.33	35.64	99	00:01:07
00:01:14	34.65	52.4	24.34	35.65	99	00:01:08
00:01:15	34.65	52.4	24.34	35.65	99	00:01:09
00:01:16	34.64	52.4	24.34	35.64	98	00:01:10
00:01:17	34.64	52.4	24.34	35.64	97	00:01:11
00:01:18	34.64	52.4	24.34	35.64	96	00:01:12
00:01:19	34.63	52.4	24.34	35.63	96	00:01:13
00:01:20	34.62	52.56	24.36	35.62	96	00:01:14
00:01:21	34.62	52.72	24.35	35.62	96	00:01:15
00:01:22	34.63	52.97	24.36	35.63	96	00:01:16
00:01:23	34.63	53.35	24.36	35.63	97	00:01:17
00:01:24	34.64	53.86	24.36	35.64	97	00:01:18
00:01:25	34.64	54.49	24.38	35.64	97	00:01:19
00:01:26	34.65	55.61	24.38	35.65	97	00:01:20
00:01:27	34.64	56.67	24.39	35.64	98	00:01:21
00:01:28	34.65	57.41	24.41	35.65	102	00:01:22
00:01:29	34.65	58.34	24.41	35.65	107	00:01:23
00:01:31	34.64	58.76	24.38	35.64	109	00:01:24
00:01:32	34.65	59.16	24.4	35.65	111	00:01:25
00:01:33	34.64	59.92	24.42	35.64	112	00:01:26
00:01:34	34.63	60.16	24.43	35.63	111	00:01:27
00:01:35	34.64	59.86	24.42	35.64	104	00:01:28
00:01:36	34.64	59.31	24.42	35.64	99	00:01:29
00:01:37	34.63	59.38	24.45	35.63	98	00:01:30
00:01:38	34.64	59.44	24.44	35.64	100	00:01:31
00:01:39	34.64	59.07	24.45	35.64	102	00:01:32
00:01:40	34.64	58.59	24.46	35.64	102	00:01:33
00:01:41	34.64	58.07	24.47	35.64	103	00:01:34
00:01:42	34.64	57.67	24.46	35.64	104	00:01:35
00:01:43	34.63	57.48	24.47	35.63	107	00:01:36
00:01:44	34.63	57.3	24.47	35.63	109	00:01:37
00:01:45	34.63	57.02	24.47	35.63	110	00:01:38
00:01:46	34.63	56.8	24.48	35.63	109	00:01:39
00:01:48	34.64	56.4	24.43	35.64	107	00:01:40
00:01:49	34.64	56.22	24.45	35.64	104	00:01:41
00:01:50	34.65	56.06	24.48	35.65	99	00:01:42
00:01:51	34.65	56	24.47	35.65	99	00:01:43
00:01:52	34.64	55.97	24.5	35.64	100	00:01:44
00:01:53	34.64	55.97	24.51	35.64	100	00:01:45
00:01:54	34.64	55.94	24.51	35.64	99	00:01:46
00:01:55	34.63	55.88	24.5	35.63	98	00:01:47
00:01:56	34.63	55.85	24.5	35.63	99	00:01:48
00:01:57	34.63	55.85	24.52	35.63	98	00:01:49
00:01:58	34.63	55.82	24.52	35.63	97	00:01:50
00:01:59	34.62	55.88	24.53	35.62	95	00:01:51
00:02:00	34.62	55.94	24.52	35.62	92	00:01:52
00:02:01	34.62	56.01	24.53	35.62	88	00:01:53
00:02:02	34.62	56.04	24.54	35.62	88	00:01:54
00:02:03	34.62	56.13	24.54	35.62	89	00:01:55
00:02:04	34.62	56.16	24.55	35.62	91	00:01:56
00:02:05	34.61	56.6	24.56	35.61	91	00:01:57
00:02:06	34.61	57.53	24.57	35.61	93	00:01:58
00:02:07	34.6	57.83	24.57	35.6	95	00:01:59
00:02:08	34.6	57.83	24.56	35.6	96	00:02:00
00:02:09	34.6	57.68	24.57	35.6	97	00:02:01
00:02:10	34.61	57.71	24.59	35.61	97	00:02:02
00:02:11	34.61	58.33	24.59	35.61	98	00:02:03
00:02:12	34.62	58.58	24.6	35.62	99	00:02:04
00:02:13	34.62	58.61	24.6	35.62	100	00:02:05
00:02:15	34.62	59.1	24.59	35.62	101	00:02:06
00:02:16	34.62	59.77	24.61	35.62	100	00:02:07
00:02:17	34.62	60.26	24.63	35.62	97	00:02:08
00:02:18	34.62	60.44	24.64	35.62	93	00:02:09
00:02:19	34.62	60.71	24.64	35.62	91	00:02:10
00:02:20	34.61	61.35	24.64	35.61	88	00:02:11
00:02:21	34.61	61.65	24.65	35.61	87	00:02:12
00:02:22	34.61	61.56	24.66	35.61	88	00:02:13
00:02:23	34.61	61.35	24.67	35.61	88	00:02:14
00:02:24	34.61	61.11	24.7	35.61	88	00:02:15
00:02:25	34.61	60.96	24.69	35.61	88	00:02:16
00:02:26	34.61	60.87	24.68	35.61	89	00:02:17
00:02:27	34.61	60.78	24.7	35.61	91	00:02:18
00:02:28	34.6	60.66	24.7	35.6	91	00:02:19
00:02:29	34.6	60.57	24.72	35.6	89	00:02:20
00:02:30	34.6	60.42	24.72	35.6	88	00:02:21
00:02:31	34.59	60.3	24.72	35.59	89	00:02:22
00:02:32	34.58	60.12	24.73	35.58	91	00:02:23
00:02:33	34.58	59.91	24.73	35.58	94	00:02:24
00:02:34	34.57	59.76	24.74	35.57	97	00:02:25
00:02:35	34.58	59.67	24.74	35.58	99	00:02:26
00:02:36	34.58	59.94	24.74	35.58	101	00:02:27
00:02:37	34.58	60.43	24.76	35.58	103	00:02:28
00:02:38	34.58	61.03	24.76	35.58	105	00:02:29
00:02:39	34.58	61.24	24.77	35.58	107	00:02:30
00:02:40	34.58	61.04	24.77	35.58	107	00:02:31
00:02:42	34.58	60.06	24.74	35.58	106	00:02:32
00:02:43	34.57	59.58	24.78	35.57	104	00:02:33
00:02:44	34.55	59.12	24.78	35.55	103	00:02:34
00:02:45	34.52	58.7	24.79	35.52	103	00:02:35
00:02:46	34.5	58.05	24.79	35.5	103	00:02:36
00:02:47	34.5	57.34	24.78	35.5	104	00:02:37
00:02:48	34.48	56.91	24.8	35.48	105	00:02:38
00:02:49	34.48	56.7	24.8	35.48	103	00:02:39
00:02:50	34.49	56.51	24.81	35.49	101	00:02:40
00:02:51	34.5	56.39	24.81	35.5	99	00:02:41
00:02:52	34.52	56.3	24.83	35.52	99	00:02:42
00:02:53	34.56	56.3	24.82	35.56	100	00:02:43
00:02:54	34.58	56.49	24.82	35.58	100	00:02:44
00:02:55	34.61	56.49	24.84	35.61	101	00:02:45
00:02:56	34.62	56.24	24.85	35.62	101	00:02:46
00:02:57	34.64	56.21	24.86	35.64	103	00:02:47
00:02:58	34.65	56.27	24.86	35.65	104	00:02:48
00:02:59	34.66	56.43	24.86	35.66	105	00:02:49
00:03:00	34.65	56.49	24.87	35.65	107	00:02:50
00:03:01	34.66	56.49	24.87	35.66	105	00:02:51
00:03:02	34.66	56.46	24.88	35.66	107	00:02:52
00:03:03	34.66	56.31	24.88	35.66	108	00:02:53
00:03:04	34.66	56.12	24.88	35.66	110	00:02:54
00:03:05	34.66	55.96	24.88	35.66	111	00:02:55
00:03:06	34.67	55.81	24.89	35.67	111	00:02:56
00:03:07	34.67	55.75	24.9	35.67	111	00:02:57
00:03:08	34.68	55.88	24.91	35.68	111	00:02:58
00:03:09	34.68	56.28	24.93	35.68	112	00:02:59
00:03:10	34.69	56.56	24.92	35.69	111	00:03:00
00:03:11	34.69	56.72	24.93	35.69	109	00:03:01
00:03:12	34.7	56.87	24.93	35.7	108	00:03:02
00:03:13	34.7	57.03	24.95	35.7	106	00:03:03
00:03:14	34.71	57.31	24.96	35.71	104	00:03:04
00:03:15	34.71	57.37	24.96	35.71	104	00:03:05
00:03:16	34.71	57.28	24.97	35.71	107	00:03:06
00:03:17	34.71	57.16	24.97	35.71	108	00:03:07
00:03:18	34.71	57.03	24.98	35.71	110	00:03:08
00:03:19	34.71	56.94	24.99	35.71	109	00:03:09
00:03:20	34.71	56.88	25	35.71	107	00:03:10
00:03:21	34.71	56.85	25	35.71	102	00:03:11
00:03:22	34.72	56.76	25	35.72	100	00:03:12
00:03:23	34.72	56.57	25	35.72	101	00:03:13
00:03:24	34.72	56.2	25.01	35.72	103	00:03:14
00:03:25	34.74	55.98	25	35.74	104	00:03:15
00:03:26	34.76	55.89	25.01	35.76	105	00:03:16
00:03:27	34.77	55.92	25.02	35.77	105	00:03:17
00:03:28	34.8	55.92	25.03	35.8	107	00:03:18
00:03:29	34.81	56.11	25.04	35.81	108	00:03:19
00:03:30	34.81	56.36	25.03	35.81	109	00:03:20
00:03:31	34.81	56.64	25.04	35.81	110	00:03:21
00:03:32	34.82	56.76	25.05	35.82	111	00:03:22
00:03:33	34.82	56.52	25.05	35.82	111	00:03:23
00:03:34	34.83	56.17	25.05	35.83	111	00:03:24
00:03:35	34.84	55.96	25.06	35.84	112	00:03:25
00:03:36	34.85	55.9	25.06	35.85	113	00:03:26
00:03:37	34.85	55.71	25.07	35.85	115	00:03:27
00:03:38	34.86	55.52	25.08	35.86	116	00:03:28
00:03:39	34.86	55.34	25.07	35.86	118	00:03:29
00:03:40	34.86	55.09	25.08	35.86	118	00:03:30
00:03:41	34.86	54.77	25.08	35.86	117	00:03:31
00:03:42	34.86	54.4	25.09	35.86	117	00:03:32
00:03:43	34.85	54.08	25.08	35.85	117	00:03:33
00:03:44	34.85	53.83	25.09	35.85	118	00:03:34
00:03:45	34.85	53.58	25.1	35.85	119	00:03:35
00:03:46	34.85	53.36	25.1	35.85	119	00:03:36
00:03:47	34.86	53.11	25.11	35.86	120	00:03:37
00:03:48	34.87	52.95	25.11	35.87	121	00:03:38
00:03:49	34.87	52.92	25.12	35.87	122	00:03:39
00:03:50	34.88	53.11	25.13	35.88	123	00:03:40
00:03:51	34.87	53.21	25.14	35.87	118	00:03:41
00:03:52	34.86	53.27	25.15	35.86	112	00:03:42
00:03:53	34.86	53.08	25.15	35.86	108	00:03:43
00:03:54	34.86	52.92	25.15	35.86	106	00:03:44
00:03:55	34.86	52.89	25.14	35.86	106	00:03:45
00:03:56	34.86	52.96	25.15	35.86	107	00:03:46
00:03:57	34.86	52.96	25.16	35.86	108	00:03:47
00:03:58	34.85	52.93	25.16	35.85	109	00:03:48
00:03:59	34.85	52.9	25.16	35.85	109	00:03:49
00:04:00	34.84	52.96	25.17	35.84	109	00:03:50
00:04:01	34.85	53.21	25.18	35.85	109	00:03:51
00:04:02	34.84	53.34	25.18	35.84	108	00:03:52
00:04:03	34.85	53.5	25.19	35.85	109	00:03:53
00:04:04	34.85	53.6	25.2	35.85	110	00:03:54
00:04:05	34.85	53.66	25.22	35.85	114	00:03:55
00:04:06	34.84	53.79	25.21	35.84	115	00:03:56
00:04:07	34.85	54.01	25.21	35.85	116	00:03:57
00:04:08	34.84	54.26	25.22	35.84	115	00:03:58
00:04:09	34.85	54.55	25.24	35.85	115	00:03:59
00:04:10	34.85	54.73	25.24	35.85	114	00:04:00
00:04:11	34.86	54.86	25.24	35.86	115	00:04:01
00:04:12	34.87	54.86	25.25	35.87	118	00:04:02
00:04:13	34.87	54.77	25.24	35.87	120	00:04:03
00:04:14	34.86	54.8	25.26	35.86	120	00:04:04
00:04:15	34.87	54.93	25.27	35.87	119	00:04:05
00:04:16	34.86	54.93	25.28	35.86	117	00:04:06
00:04:17	34.85	54.83	25.27	35.85	115	00:04:07
00:04:18	34.85	54.87	25.29	35.85	115	00:04:08
00:04:19	34.86	54.93	25.29	35.86	116	00:04:09
00:04:20	34.85	55.03	25.3	35.85	117	00:04:10
00:04:21	34.86	54.96	25.32	35.86	118	00:04:11
00:04:22	34.86	54.81	25.31	35.86	119	00:04:12
00:04:23	34.86	54.62	25.32	35.86	120	00:04:13
00:04:24	34.85	54.37	25.32	35.85	119	00:04:14
00:04:25	34.85	54.18	25.34	35.85	118	00:04:15
00:04:26	34.84	53.99	25.34	35.84	116	00:04:16
00:04:27	34.84	53.87	25.34	35.84	116	00:04:17
00:04:28	34.84	53.77	25.36	35.84	115	00:04:18
00:04:29	34.84	53.65	25.36	35.84	114	00:04:19
00:04:30	34.84	53.49	25.36	35.84	115	00:04:20
00:04:31	34.84	53.43	25.35	35.84	116	00:04:21
00:04:32	34.84	53.43	25.36	35.84	116	00:04:22
00:04:33	34.83	53.46	25.38	35.83	118	00:04:23
00:04:34	34.82	53.49	25.37	35.82	118	00:04:24
00:04:35	34.81	53.59	25.38	35.81	120	00:04:25
00:04:36	34.8	53.65	25.4	35.8	121	00:04:26
00:04:37	34.79	53.69	25.41	35.79	121	00:04:27
00:04:38	34.79	53.56	25.4	35.79	122	00:04:28
00:04:39	34.78	53.44	25.41	35.78	122	00:04:29
00:04:40	34.78	53.24	25.41	35.78	122	00:04:30
00:04:41	34.77	53.06	25.41	35.77	121	00:04:31
00:04:42	34.78	52.93	25.42	35.78	122	00:04:32
00:04:43	34.77	52.93	25.42	35.77	122	00:04:33
00:04:44	34.77	53	25.43	35.77	122	00:04:34
00:04:45	34.76	53.09	25.44	35.76	122	00:04:35
00:04:46	34.76	53.12	25.45	35.76	121	00:04:36
00:04:47	34.75	53.09	25.44	35.75	122	00:04:37
00:04:48	34.75	53.06	25.44	35.75	122	00:04:38
00:04:49	34.75	53.03	25.46	35.75	122	00:04:39
00:04:50	34.75	52.9	25.46	35.75	122	00:04:40
00:04:51	34.74	52.65	25.47	35.74	123	00:04:41
00:04:52	34.74	52.43	25.45	35.74	123	00:04:42
00:04:53	34.74	52.27	25.46	35.74	123	00:04:43
00:04:55	34.72	52.05	25.43	35.72	124	00:04:44
00:04:56	34.72	51.98	25.46	35.72	125	00:04:45
00:04:57	34.71	51.92	25.48	35.71	126	00:04:46
00:04:58	34.71	51.83	25.5	35.71	126	00:04:47
00:04:59	34.71	51.79	25.5	35.71	126	00:04:48
00:05:00	34.72	51.83	25.5	35.72	124	00:04:49
00:05:01	34.72	51.86	25.49	35.72	123	00:04:50
00:05:02	34.71	51.93	25.5	35.71	122	00:04:51
00:05:03	34.7	51.96	25.51	35.7	121	00:04:52
00:05:04	34.69	51.93	25.52	35.69	121	00:04:53
00:05:05	34.67	51.86	25.52	35.67	120	00:04:54
00:05:06	34.66	51.83	25.53	35.66	121	00:04:55
00:05:07	34.66	51.8	25.53	35.66	121	00:04:56
00:05:08	34.66	51.74	25.52	35.66	122	00:04:57
00:05:09	34.67	51.74	25.54	35.67	123	00:04:58
00:05:10	34.66	51.74	25.54	35.66	123	00:04:59
00:05:11	34.66	51.71	25.56	35.66	123	00:05:00
00:05:12	34.67	51.68	25.55	35.67	122	00:05:01
00:05:13	34.66	51.67	25.54	35.66	121	00:05:02
00:05:14	34.64	51.68	25.55	35.64	121	00:05:03
00:05:15	34.64	51.68	25.56	35.64	120	00:05:04
00:05:16	34.63	51.68	25.56	35.63	121	00:05:05
00:05:17	34.62	51.68	25.58	35.62	121	00:05:06
00:05:18	34.63	51.62	25.59	35.63	121	00:05:07
00:05:19	34.62	51.55	25.6	35.62	121	00:05:08
00:05:20	34.61	51.49	25.6	35.61	120	00:05:09
00:05:21	34.6	51.43	25.6	35.6	120	00:05:10
00:05:22	34.6	51.43	25.61	35.6	119	00:05:11
00:05:23	34.59	51.49	25.61	35.59	118	00:05:12
00:05:24	34.59	51.52	25.63	35.59	116	00:05:13
00:05:25	34.6	51.56	25.62	35.6	115	00:05:14
00:05:26	34.6	51.56	25.62	35.6	115	00:05:15
00:05:27	34.59	51.65	25.63	35.59	115	00:05:16
00:05:28	34.59	51.81	25.63	35.59	115	00:05:17
00:05:29	34.58	51.91	25.62	35.58	115	00:05:18
00:05:30	34.56	51.78	25.64	35.56	114	00:05:19
00:05:31	34.55	51.75	25.64	35.55	115	00:05:20
00:05:32	34.54	51.85	25.64	35.54	117	00:05:21
00:05:33	34.53	51.97	25.65	35.53	116	00:05:22
00:05:34	34.53	51.85	25.65	35.53	113	00:05:23
00:05:35	34.53	51.53	25.65	35.53	107	00:05:24
00:05:36	34.53	51.24	25.64	35.53	103	00:05:25
00:05:37	34.53	50.98	25.64	35.53	99	00:05:26
00:05:38	34.53	50.92	25.65	35.53	98	00:05:27
00:05:39	34.53	51.11	25.66	35.53	101	00:05:28
00:05:40	34.52	51.44	25.66	35.52	106	00:05:29
00:05:41	34.52	51.82	25.68	35.52	110	00:05:30
00:05:42	34.51	52.27	25.68	35.51	113	00:05:31
00:05:43	34.5	52.68	25.68	35.5	113	00:05:32
00:05:44	34.5	53.03	25.68	35.5	109	00:05:33
00:05:45	34.51	53.16	25.7	35.51	106	00:05:34
00:05:46	34.5	53.16	25.71	35.5	104	00:05:35
00:05:47	34.51	53.16	25.71	35.51	103	00:05:36
00:05:48	34.51	53.19	25.72	35.51	101	00:05:37
00:05:49	34.5	53.13	25.73	35.5	101	00:05:38
00:05:50	34.5	53.16	25.72	35.5	103	00:05:39
00:05:51	34.5	53.26	25.73	35.5	103	00:05:40
00:05:52	34.5	53.45	25.74	35.5	104	00:05:41
00:05:53	34.51	53.48	25.74	35.51	106	00:05:42
00:05:54	34.52	53.32	25.74	35.52	109	00:05:43
00:05:55	34.51	53.04	25.74	35.51	111	00:05:44
00:05:56	34.51	52.66	25.75	35.51	112	00:05:45
00:05:57	34.51	52.15	25.74	35.51	113	00:05:46
00:05:58	34.5	51.76	25.74	35.5	114	00:05:47
00:05:59	34.5	51.48	25.75	35.5	114	00:05:48
00:06:00	34.5	51.32	25.76	35.5	113	00:05:49
00:06:01	34.51	51.32	25.76	35.51	113	00:05:50
00:06:02	34.5	51.19	25.75	35.5	112	00:05:51
00:06:03	34.5	51.09	25.76	35.5	112	00:05:52
00:06:04	34.49	51.06	25.75	35.49	112	00:05:53
00:06:06	34.47	51.41	25.74	35.47	109	00:05:54
00:06:07	34.46	51.64	25.76	35.46	106	00:05:55
00:06:08	34.46	51.83	25.77	35.46	105	00:05:56
00:06:09	34.46	51.9	25.78	35.46	104	00:05:57
00:06:10	34.46	51.93	25.8	35.46	104	00:05:58
00:06:11	34.46	51.9	25.8	35.46	105	00:05:59
00:06:12	34.46	52.03	25.81	35.46	105	00:06:00
00:06:13	34.45	52.32	25.81	35.45	105	00:06:01
00:06:14	34.45	52.86	25.84	35.45	105	00:06:02
00:06:15	34.45	53.37	25.86	35.45	106	00:06:03
00:06:16	34.43	53.75	25.86	35.43	106	00:06:04
00:06:17	34.42	53.91	25.86	35.42	105	00:06:05
00:06:18	34.41	53.94	25.88	35.41	102	00:06:06
00:06:19	34.41	54.52	25.9	35.41	99	00:06:07
00:06:20	34.41	55.02	25.92	35.41	94	00:06:08
00:06:21	34.41	55.33	25.91	35.41	92	00:06:09
00:06:22	34.4	55.52	25.92	35.4	93	00:06:10
00:06:23	34.4	55.58	25.92	35.4	98	00:06:11
00:06:24	34.38	55.58	25.94	35.38	102	00:06:12
00:06:25	34.37	55.46	25.94	35.37	103	00:06:13
00:06:26	34.36	55.21	25.94	35.36	103	00:06:14
00:06:27	34.36	55.02	25.93	35.36	102	00:06:15
00:06:28	34.35	54.83	25.94	35.35	97	00:06:16
00:06:29	34.35	54.58	25.94	35.35	93	00:06:17
00:06:30	34.35	54.42	25.95	35.35	94	00:06:18
00:06:31	34.34	54.2	25.95	35.34	98	00:06:19
00:06:32	34.33	54.17	25.95	35.33	102	00:06:20
00:06:33	34.32	54.49	25.96	35.32	104	00:06:21
00:06:34	34.31	54.81	25.97	35.31	103	00:06:22
00:06:35	34.29	54.93	25.98	35.29	99	00:06:23
00:06:36	34.28	54.81	25.98	35.28	101	00:06:24
00:06:37	34.28	54.74	25.99	35.28	101	00:06:25
00:06:38	34.27	54.71	25.98	35.27	100	00:06:26
00:06:39	34.26	54.59	25.98	35.26	102	00:06:27
00:06:40	34.26	54.4	25.99	35.26	103	00:06:28
00:06:41	34.25	54.34	25.98	35.25	105	00:06:29
00:06:42	34.25	54.34	26	35.25	107	00:06:30
00:06:43	34.25	54.4	26.01	35.25	108	00:06:31
00:06:44	34.25	54.47	26.02	35.25	110	00:06:32
00:06:45	34.25	54.5	26.02	35.25	110	00:06:33
00:06:46	34.25	54.5	26.02	35.25	108	00:06:34
00:06:47	34.25	54.53	26.02	35.25	105	00:06:35
00:06:48	34.25	54.47	26.03	35.25	100	00:06:36
00:06:49	34.24	54.4	26.04	35.24	95	00:06:37
00:06:50	34.24	54.47	26.04	35.24	95	00:06:38
00:06:51	34.23	54.6	26.05	35.23	97	00:06:39
00:06:52	34.23	54.63	26.05	35.23	103	00:06:40
00:06:53	34.23	54.63	26.06	35.23	107	00:06:41
00:06:54	34.23	54.6	26.07	35.23	104	00:06:42
00:06:55	34.23	54.63	26.08	35.23	101	00:06:43
00:06:56	34.22	54.73	26.09	35.22	96	00:06:44
00:06:57	34.22	54.86	26.1	35.22	92	00:06:45
00:06:58	34.21	54.92	26.11	35.21	93	00:06:46
00:06:59	34.2	54.86	26.1	35.2	96	00:06:47
00:07:00	34.21	54.82	26.11	35.21	101	00:06:48
00:07:01	34.22	54.73	26.11	35.22	106	00:06:49
00:07:02	34.22	54.67	26.12	35.22	110	00:06:50
00:07:03	34.22	54.64	26.12	35.22	108	00:06:51
00:07:04	34.23	54.54	26.12	35.23	106	00:06:52
00:07:05	34.21	54.45	26.13	35.21	105	00:06:53
00:07:06	34.21	54.42	26.14	35.21	103	00:06:54
00:07:07	34.21	54.36	26.14	35.21	97	00:06:55
00:07:08	34.2	54.26	26.15	35.2	83	00:06:56
00:07:09	34.2	54.23	26.15	35.2	81	00:06:57
00:07:10	34.2	54.17	26.16	35.2	82	00:06:58
00:07:11	34.2	54.04	26.15	35.2	86	00:06:59
00:07:12	34.2	53.79	26.16	35.2	91	00:07:00
00:07:13	34.21	53.57	26.16	35.21	97	00:07:01
00:07:14	34.21	53.6	26.16	35.21	99	00:07:02
00:07:15	34.22	53.7	26.16	35.22	98	00:07:03
00:07:16	34.22	53.79	26.16	35.22	93	00:07:04
00:07:17	34.21	53.79	26.17	35.21	89	00:07:05
00:07:18	34.21	53.79	26.17	35.21	86	00:07:06
00:07:19	34.21	53.76	26.19	35.21	86	00:07:07
00:07:20	34.2	53.92	26.2	35.2	92	00:07:08
00:07:21	34.2	54.05	26.2	35.2	94	00:07:09
00:07:22	34.21	54.05	26.21	35.21	96	00:07:10
00:07:23	34.21	53.9	26.22	35.21	97	00:07:11
00:07:24	34.2	53.99	26.23	35.2	93	00:07:12
00:07:25	34.2	54.05	26.23	35.2	90	00:07:13
00:07:26	34.19	54.12	26.24	35.19	92	00:07:14
00:07:27	34.19	54.18	26.25	35.19	95	00:07:15
00:07:28	34.18	54.15	26.25	35.18	99	00:07:16
00:07:29	34.18	54.12	26.24	35.18	100	00:07:17
00:07:30	34.18	54.03	26.25	35.18	100	00:07:18
00:07:31	34.18	53.93	26.26	35.18	99	00:07:19
00:07:32	34.19	53.87	26.27	35.19	101	00:07:20
00:07:33	34.19	53.81	26.28	35.19	103	00:07:21
00:07:34	34.18	53.74	26.28	35.18	105	00:07:22
00:07:35	34.17	53.75	26.28	35.17	106	00:07:23
00:07:36	34.16	53.65	26.29	35.16	104	00:07:24
00:07:37	34.13	53.56	26.3	35.13	102	00:07:25
00:07:38	34.12	53.46	26.3	35.12	96	00:07:26
00:07:39	34.12	53.37	26.29	35.12	92	00:07:27
00:07:41	34.12	53.37	26.27	35.12	93	00:07:28
00:07:42	34.12	53.37	26.3	35.12	91	00:07:29
00:07:43	34.11	53.18	26.32	35.11	93	00:07:30
00:07:44	34.1	53.05	26.32	35.1	98	00:07:31
00:07:45	34.11	52.92	26.32	35.11	101	00:07:32
00:07:46	34.1	52.99	26.33	35.1	103	00:07:33
00:07:47	34.11	52.96	26.33	35.11	103	00:07:34
00:07:48	34.12	52.9	26.34	35.12	97	00:07:35
00:07:49	34.12	52.9	26.36	35.12	92	00:07:36
00:07:50	34.12	53.06	26.35	35.12	89	00:07:37
00:07:51	34.13	53.25	26.36	35.13	89	00:07:38
00:07:52	34.13	53.41	26.37	35.13	90	00:07:39
00:07:53	34.13	53.63	26.37	35.13	95	00:07:40
00:07:54	34.13	53.89	26.37	35.13	97	00:07:41
00:07:55	34.13	53.98	26.38	35.13	99	00:07:42
00:07:56	34.13	54.01	26.38	35.13	102	00:07:43
00:07:57	34.13	54.04	26.39	35.13	104	00:07:44
00:07:58	34.13	54.02	26.4	35.13	103	00:07:45
00:07:59	34.14	54.02	26.4	35.14	103	00:07:46
00:08:00	34.14	54.02	26.41	35.14	100	00:07:47
00:08:01	34.14	54.02	26.41	35.14	97	00:07:48
00:08:02	34.14	54.08	26.42	35.14	98	00:07:49
00:08:03	34.14	54.3	26.43	35.14	99	00:07:50
00:08:04	34.13	54.43	26.44	35.13	99	00:07:51
00:08:05	34.13	54.53	26.44	35.13	101	00:07:52
00:08:06	34.13	54.59	26.45	35.13	99	00:07:53
00:08:07	34.13	54.65	26.45	35.13	97	00:07:54
00:08:08	34.13	54.65	26.46	35.13	97	00:07:55
00:08:09	34.13	54.53	26.46	35.13	100	00:07:56
00:08:10	34.14	54.43	26.47	35.14	102	00:07:57
00:08:11	34.14	54.31	26.47	35.14	104	00:07:58
00:08:12	34.15	54.18	26.47	35.15	105	00:07:59
00:08:13	34.17	54.09	26.48	35.17	106	00:08:00
00:08:14	34.17	53.99	26.49	35.17	106	00:08:01
00:08:15	34.16	53.9	26.48	35.16	107	00:08:02
00:08:16	34.16	53.87	26.5	35.16	104	00:08:03
00:08:17	34.15	53.84	26.5	35.15	101	00:08:04
00:08:18	34.13	53.81	26.5	35.13	96	00:08:05
00:08:19	34.13	53.71	26.51	35.13	93	00:08:06
00:08:20	34.13	53.52	26.51	35.13	93	00:08:07
00:08:21	34.13	53.14	26.51	35.13	96	00:08:08
00:08:22	34.13	52.89	26.52	35.13	98	00:08:09
00:08:23	34.13	52.7	26.52	35.13	100	00:08:10
00:08:24	34.13	52.76	26.53	35.13	103	00:08:11
00:08:25	34.13	53.05	26.54	35.13	104	00:08:12
00:08:26	34.13	53.43	26.54	35.13	102	00:08:13
00:08:28	34.14	53.85	26.53	35.14	99	00:08:14
00:08:29	34.14	53.91	26.55	35.14	97	00:08:15
00:08:30	34.15	53.91	26.55	35.15	94	00:08:16
00:08:31	34.15	53.97	26.58	35.15	91	00:08:17
00:08:32	34.16	53.95	26.58	35.16	92	00:08:18
00:08:33	34.15	53.91	26.58	35.15	94	00:08:19
00:08:34	34.16	53.82	26.58	35.16	95	00:08:20
00:08:35	34.17	53.85	26.6	35.17	97	00:08:21
00:08:36	34.19	53.88	26.59	35.19	97	00:08:22
00:08:37	34.19	53.85	26.61	35.19	97	00:08:23
00:08:38	34.2	53.85	26.61	35.2	98	00:08:24
00:08:39	34.2	53.85	26.62	35.2	99	00:08:25
00:08:40	34.19	53.92	26.62	35.19	100	00:08:26
00:08:41	34.19	54.02	26.64	35.19	101	00:08:27
00:08:42	34.19	54.05	26.64	35.19	103	00:08:28
00:08:43	34.18	53.96	26.65	35.18	105	00:08:29
00:08:45	34.19	53.86	26.63	35.19	105	00:08:30
00:08:46	34.18	53.8	26.65	35.18	105	00:08:31
00:08:47	34.19	53.99	26.67	35.19	106	00:08:32
00:08:48	34.2	54.15	26.68	35.2	107	00:08:33
00:08:49	34.21	54.18	26.68	35.21	106	00:08:34
00:08:50	34.23	54.09	26.7	35.23	103	00:08:35
00:08:51	34.25	53.99	26.7	35.25	101	00:08:36
00:08:52	34.27	53.87	26.71	35.27	101	00:08:37
00:08:53	34.28	53.77	26.72	35.28	101	00:08:38
00:08:54	34.28	53.62	26.71	35.28	101	00:08:39
00:08:55	34.29	53.46	26.72	35.29	103	00:08:40
00:08:56	34.29	53.39	26.72	35.29	105	00:08:41
00:08:57	34.28	53.3	26.73	35.28	107	00:08:42
00:08:58	34.27	53.27	26.74	35.27	108	00:08:43
00:08:59	34.27	53.27	26.75	35.27	106	00:08:44
00:09:00	34.26	53.43	26.77	35.26	101	00:08:45
00:09:01	34.26	53.62	26.78	35.26	97	00:08:46
00:09:02	34.26	53.78	26.78	35.26	94	00:08:47
00:09:03	34.27	53.82	26.79	35.27	94	00:08:48
00:09:04	34.28	53.75	26.79	35.28	95	00:08:49
00:09:05	34.28	53.6	26.8	35.28	96	00:08:50
00:09:06	34.29	53.34	26.79	35.29	97	00:08:51
00:09:07	34.29	53.28	26.8	35.29	100	00:08:52
00:09:08	34.28	53.47	26.82	35.28	101	00:08:53
00:09:09	34.28	53.63	26.8	35.28	101	00:08:54
00:09:10	34.3	53.66	26.82	35.3	102	00:08:55
00:09:11	34.29	53.69	26.82	35.29	102	00:08:56
00:09:12	34.29	53.76	26.84	35.29	103	00:08:57
00:09:13	34.29	53.73	26.83	35.29	105	00:08:58
00:09:14	34.29	53.57	26.83	35.29	106	00:08:59
00:09:15	34.3	53.38	26.84	35.3	107	00:09:00
00:09:16	34.33	53.28	26.86	35.33	109	00:09:01
00:09:17	34.34	53.09	26.86	35.34	110	00:09:02
00:09:18	34.36	52.87	26.86	35.36	108	00:09:03
00:09:19	34.36	52.65	26.86	35.36	103	00:09:04
00:09:20	34.37	52.49	26.86	35.37	100	00:09:05
00:09:21	34.36	52.43	26.86	35.36	99	00:09:06
00:09:22	34.35	52.27	26.86	35.35	100	00:09:07
00:09:23	34.35	52.17	26.88	35.35	100	00:09:08
00:09:24	34.35	52.11	26.88	35.35	100	00:09:09
00:09:25	34.34	52.08	26.89	35.34	101	00:09:10
00:09:26	34.34	52.11	26.89	35.34	102	00:09:11
00:09:27	34.35	52.3	26.9	35.35	103	00:09:12
00:09:29	34.35	52.46	26.88	35.35	100	00:09:13
00:09:30	34.35	52.56	26.9	35.35	96	00:09:14
00:09:31	34.35	52.56	26.92	35.35	92	00:09:15
00:09:32	34.35	52.56	26.93	35.35	91	00:09:16
00:09:33	34.35	52.56	26.92	35.35	94	00:09:17
00:09:34	34.34	52.5	26.94	35.34	95	00:09:18
00:09:35	34.34	52.44	26.94	35.34	93	00:09:19
00:09:36	34.34	52.6	26.96	35.34	91	00:09:20
00:09:37	34.33	52.73	26.97	35.33	91	00:09:21
00:09:38	34.33	52.82	26.96	35.33	93	00:09:22
00:09:39	34.34	52.86	26.98	35.34	94	00:09:23
00:09:40	34.33	52.89	26.98	35.33	96	00:09:24
00:09:41	34.33	52.83	26.98	35.33	97	00:09:25
00:09:42	34.33	52.67	27	35.33	99	00:09:26
00:09:43	34.33	52.38	26.99	35.33	102	00:09:27
00:09:44	34.32	52.15	27.01	35.32	104	00:09:28
00:09:45	34.33	52.19	27	35.33	104	00:09:29
00:09:46	34.33	52.38	27.02	35.33	100	00:09:30
00:09:47	34.33	52.41	27.02	35.33	99	00:09:31
00:09:48	34.34	52.38	27.02	35.34	97	00:09:32
00:09:49	34.33	52.32	27.02	35.33	98	00:09:33
00:09:50	34.31	52.19	27.03	35.31	99	00:09:34
00:09:51	34.3	52.06	27.03	35.3	98	00:09:35
00:09:52	34.29	51.94	27.04	35.29	97	00:09:36
00:09:53	34.27	51.91	27.05	35.27	96	00:09:37
00:09:54	34.27	51.94	27.06	35.27	95	00:09:38
00:09:55	34.28	52.13	27.06	35.28	95	00:09:39
00:09:56	34.29	52.13	27.06	35.29	96	00:09:40
00:09:57	34.3	51.97	27.06	35.3	99	00:09:41
00:09:58	34.3	51.91	27.07	35.3	100	00:09:42
00:09:59	34.3	51.81	27.08	35.3	101	00:09:43
00:10:00	34.29	51.59	27.07	35.29	102	00:09:44
00:10:01	34.28	51.49	27.08	35.28	102	00:09:45
00:10:02	34.26	51.49	27.09	35.26	102	00:09:46
00:10:03	34.26	51.49	27.1	35.26	102	00:09:47
00:10:04	34.26	51.53	27.1	35.26	102	00:09:48
00:10:05	34.26	51.37	27.11	35.26	103	00:09:49
00:10:06	34.26	51.27	27.11	35.26	105	00:09:50
00:10:07	34.27	51.31	27.12	35.27	105	00:09:51
00:10:08	34.27	51.24	27.12	35.27	102	00:09:52
00:10:09	34.26	51.12	27.13	35.26	99	00:09:53
00:10:10	34.26	51.05	27.14	35.26	95	00:09:54
00:10:11	34.26	51.15	27.16	35.26	93	00:09:55
00:10:12	34.25	51.18	27.14	35.25	93	00:09:56
00:10:13	34.24	51.25	27.16	35.24	93	00:09:57
00:10:14	34.24	51.25	27.17	35.24	94	00:09:58
00:10:15	34.21	51.31	27.16	35.21	97	00:09:59
00:10:16	34.18	51.31	27.17	35.18	99	00:10:00
00:10:17	34.17	51.34	27.17	35.17	102	00:10:01
00:10:18	34.16	51.35	27.18	35.16	104	00:10:02
00:10:19	34.15	51.28	27.18	35.15	105	00:10:03
00:10:20	34.16	51.25	27.19	35.16	104	00:10:04
00:10:21	34.16	51.15	27.19	35.16	99	00:10:05
00:10:22	34.16	51.12	27.2	35.16	96	00:10:06
00:10:23	34.17	51.32	27.2	35.17	92	00:10:07
00:10:24	34.17	51.51	27.21	35.17	91	00:10:08
00:10:25	34.17	51.58	27.22	35.17	91	00:10:09
00:10:26	34.19	51.58	27.22	35.19	93	00:10:10
00:10:27	34.19	51.35	27.22	35.19	94	00:10:11
00:10:28	34.18	51.22	27.24	35.18	97	00:10:12
00:10:29	34.19	51.19	27.23	35.19	99	00:10:13
00:10:30	34.19	51.16	27.24	35.19	102	00:10:14
00:10:31	34.18	51	27.24	35.18	103	00:10:15
00:10:32	34.18	50.84	27.25	35.18	102	00:10:16
00:10:33	34.18	50.71	27.24	35.18	103	00:10:17
00:10:34	34.18	50.68	27.25	35.18	101	00:10:18
00:10:35	34.18	50.75	27.25	35.18	102	00:10:19
00:10:36	34.18	50.88	27.26	35.18	102	00:10:20
00:10:37	34.17	51.07	27.27	35.17	103	00:10:21
00:10:38	34.16	51.13	27.28	35.16	105	00:10:22
00:10:39	34.16	51	27.28	35.16	106	00:10:23
00:10:40	34.15	50.81	27.28	35.15	108	00:10:24
00:10:41	34.15	50.75	27.28	35.15	110	00:10:25
00:10:42	34.16	50.78	27.3	35.16	112	00:10:26
00:10:43	34.17	50.75	27.3	35.17	113	00:10:27
00:10:44	34.15	50.72	27.3	35.15	114	00:10:28
00:10:45	34.15	50.62	27.3	35.15	115	00:10:29
00:10:46	34.14	50.43	27.32	35.14	113	00:10:30
00:10:47	34.13	50.27	27.31	35.13	111	00:10:31
00:10:48	34.12	50.17	27.32	35.12	109	00:10:32
00:10:49	34.13	50.17	27.32	35.13	105	00:10:33
00:10:50	34.13	50.17	27.33	35.13	97	00:10:34
00:10:51	34.13	50.24	27.34	35.13	94	00:10:35
00:10:52	34.13	50.3	27.35	35.13	91	00:10:36
00:10:53	34.12	50.4	27.37	35.12	91	00:10:37
00:10:54	34.12	50.66	27.38	35.12	93	00:10:38
00:10:55	34.11	50.69	27.37	35.11	96	00:10:39
00:10:56	34.11	50.79	27.38	35.11	100	00:10:40
00:10:57	34.09	50.89	27.38	35.09	104	00:10:41
00:10:58	34.09	51.02	27.39	35.09	107	00:10:42
00:10:59	34.08	51.11	27.39	35.08	109	00:10:43
00:11:00	34.08	51.21	27.4	35.08	110	00:10:44
00:11:01	34.07	51.34	27.41	35.07	112	00:10:45
00:11:02	34.08	51.34	27.41	35.08	114	00:10:46
00:11:03	34.08	51.21	27.42	35.08	115	00:10:47
00:11:04	34.08	51.05	27.41	35.08	114	00:10:48
00:11:05	34.08	50.89	27.42	35.08	109	00:10:49
00:11:06	34.08	50.73	27.42	35.08	105	00:10:50
00:11:07	34.08	50.73	27.43	35.08	100	00:10:51
00:11:08	34.07	50.64	27.43	35.07	97	00:10:52
00:11:09	34.06	50.44	27.43	35.06	97	00:10:53
00:11:10	34.05	50.21	27.43	35.05	99	00:10:54
00:11:11	34.05	50.05	27.44	35.05	100	00:10:55
00:11:12	34.04	50.02	27.42	35.04	101	00:10:56
00:11:13	34.04	49.86	27.44	35.04	103	00:10:57
00:11:14	34.04	49.8	27.44	35.04	103	00:10:58
00:11:15	34.04	49.83	27.44	35.04	102	00:10:59
00:11:16	34.04	49.89	27.44	35.04	101	00:11:00
00:11:17	34.04	49.99	27.45	35.04	101	00:11:01
00:11:18	34.04	50.06	27.45	35.04	102	00:11:02
00:11:19	34.04	50.16	27.46	35.04	102	00:11:03
00:11:20	34.04	50.16	27.46	35.04	103	00:11:04
00:11:21	34.04	49.99	27.46	35.04	105	00:11:05
00:11:22	34.04	49.93	27.47	35.04	107	00:11:06
00:11:23	34.04	49.9	27.47	35.04	109	00:11:07
00:11:24	34.04	50	27.49	35.04	110	00:11:08
00:11:25	34.04	50.13	27.49	35.04	109	00:11:09
00:11:26	34.04	50.29	27.5	35.04	108	00:11:10
00:11:27	34.04	50.32	27.5	35.04	107	00:11:11
00:11:28	34.04	50.29	27.52	35.04	108	00:11:12
00:11:29	34.04	50.42	27.52	35.04	108	00:11:13
00:11:30	34.04	50.49	27.53	35.04	110	00:11:14
00:11:31	34.04	50.46	27.54	35.04	110	00:11:15
00:11:32	34.04	50.39	27.53	35.04	111	00:11:16
00:11:33	34.04	50.26	27.54	35.04	112	00:11:17
00:11:34	34.04	50.2	27.54	35.04	112	00:11:18
00:11:35	34.04	50.26	27.54	35.04	113	00:11:19
00:11:36	34.04	50.39	27.54	35.04	114	00:11:20
00:11:37	34.04	50.52	27.55	35.04	115	00:11:21
00:11:38	34.04	50.75	27.56	35.04	115	00:11:22
00:11:39	34.04	50.98	27.57	35.04	109	00:11:23
00:11:40	34.04	50.85	27.56	35.04	105	00:11:24
00:11:41	34.04	50.75	27.56	35.04	102	00:11:25
00:11:42	34.04	50.72	27.58	35.04	104	00:11:26
00:11:43	34.04	50.75	27.59	35.04	103	00:11:27
00:11:44	34.03	50.75	27.58	35.03	100	00:11:28
00:11:45	34.03	50.66	27.59	35.03	100	00:11:29
00:11:46	34.03	50.53	27.59	35.03	100	00:11:30
00:11:47	34.03	50.34	27.6	35.03	101	00:11:31
00:11:48	34.03	50.4	27.6	35.03	105	00:11:32
00:11:49	34.04	50.34	27.61	35.04	109	00:11:33
00:11:50	34.03	50.43	27.61	35.03	113	00:11:34
00:11:51	34.04	50.53	27.61	35.04	114	00:11:35
00:11:52	34.04	50.6	27.63	35.04	114	00:11:36
00:11:53	34.05	50.7	27.65	35.05	113	00:11:37
00:11:54	34.06	50.7	27.64	35.06	112	00:11:38
00:11:55	34.07	50.67	27.65	35.07	111	00:11:39
00:11:56	34.06	50.83	27.66	35.06	109	00:11:40
00:11:57	34.07	50.96	27.67	35.07	106	00:11:41
00:11:58	34.07	51.05	27.67	35.07	107	00:11:42
00:11:59	34.07	51.15	27.67	35.07	103	00:11:43
00:12:00	34.08	51.12	27.68	35.08	100	00:11:44
00:12:01	34.09	50.99	27.69	35.09	97	00:11:45
00:12:02	34.09	50.93	27.69	35.09	95	00:11:46
00:12:03	34.09	50.93	27.69	35.09	96	00:11:47
00:12:04	34.09	50.87	27.7	35.09	98	00:11:48
00:12:05	34.09	50.74	27.69	35.09	101	00:11:49
00:12:06	34.09	50.64	27.7	35.09	102	00:11:50
00:12:07	34.09	50.77	27.71	35.09	104	00:11:51
00:12:08	34.09	50.96	27.73	35.09	106	00:11:52
00:12:09	34.09	50.97	27.72	35.09	104	00:11:53
00:12:10	34.09	50.93	27.73	35.09	99	00:11:54
00:12:11	34.09	50.87	27.72	35.09	96	00:11:55
00:12:12	34.09	50.77	27.74	35.09	97	00:11:56
00:12:13	34.09	50.64	27.73	35.09	100	00:11:57
00:12:14	34.09	50.52	27.73	35.09	103	00:11:58
00:12:15	34.09	50.39	27.74	35.09	104	00:11:59
00:12:16	34.09	50.32	27.75	35.09	106	00:12:00
00:12:17	34.09	50.26	27.75	35.09	107	00:12:01
00:12:18	34.09	50.16	27.75	35.09	106	00:12:02
00:12:19	34.09	50.06	27.76	35.09	106	00:12:03
00:12:20	34.09	50.16	27.78	35.09	107	00:12:04
00:12:21	34.09	50.19	27.78	35.09	106	00:12:05
00:12:22	34.09	50.2	27.77	35.09	104	00:12:06
00:12:23	34.09	50.23	27.78	35.09	102	00:12:07
00:12:24	34.09	50.23	27.79	35.09	100	00:12:08
00:12:25	34.09	50.2	27.79	35.09	99	00:12:09
00:12:26	34.08	50.17	27.79	35.08	100	00:12:10
00:12:27	34.09	50.17	27.8	35.09	102	00:12:11
00:12:29	34.1	50.39	27.76	35.1	104	00:12:12
00:12:30	34.1	50.3	27.79	35.1	105	00:12:13
00:12:31	34.11	50.39	27.81	35.11	106	00:12:14
00:12:32	34.1	50.49	27.81	35.1	105	00:12:15
00:12:33	34.09	50.49	27.82	35.09	103	00:12:16
00:12:34	34.09	50.43	27.82	35.09	99	00:12:17
00:12:35	34.09	50.17	27.82	35.09	95	00:12:18
00:12:36	34.09	49.97	27.82	35.09	91	00:12:19
00:12:37	34.1	49.88	27.82	35.1	93	00:12:20
00:12:38	34.1	49.85	27.83	35.1	94	00:12:21
00:12:39	34.11	49.88	27.83	35.11	94	00:12:22
00:12:40	34.11	49.91	27.83	35.11	97	00:12:23
00:12:42	34.11	50.07	27.82	35.11	101	00:12:24
00:12:43	34.11	50.01	27.84	35.11	103	00:12:25
00:12:44	34.1	49.91	27.85	35.1	100	00:12:26
00:12:45	34.1	49.85	27.85	35.1	100	00:12:27
00:12:46	34.09	49.81	27.84	35.09	101	00:12:28
00:12:47	34.09	49.72	27.85	35.09	101	00:12:29
00:12:48	34.1	49.62	27.86	35.1	104	00:12:30
00:12:49	34.11	49.59	27.86	35.11	109	00:12:31
00:12:50	34.12	49.59	27.86	35.12	113	00:12:32
00:12:51	34.12	49.52	27.86	35.12	110	00:12:33
00:12:52	34.13	49.33	27.86	35.13	108	00:12:34
00:12:53	34.13	49.26	27.87	35.13	105	00:12:35
00:12:54	34.13	49.3	27.86	35.13	98	00:12:36
00:12:55	34.13	49.33	27.88	35.13	92	00:12:37
00:12:56	34.13	49.49	27.88	35.13	92	00:12:38
00:12:57	34.13	49.62	27.89	35.13	93	00:12:39
00:12:58	34.13	49.79	27.89	35.13	95	00:12:40
00:12:59	34.13	49.98	27.9	35.13	96	00:12:41
00:13:00	34.13	50.12	27.91	35.13	99	00:12:42
00:13:01	34.13	50.21	27.92	35.13	101	00:12:43
00:13:02	34.13	50.25	27.92	35.13	105	00:12:44
00:13:03	34.13	50.35	27.92	35.13	107	00:12:45
00:13:04	34.13	50.38	27.93	35.13	108	00:12:46
00:13:05	34.14	50.44	27.93	35.14	108	00:12:47
00:13:06	34.14	50.48	27.94	35.14	108	00:12:48
00:13:07	34.14	50.48	27.95	35.14	107	00:12:49
00:13:08	34.14	50.51	27.95	35.14	107	00:12:50
00:13:09	34.14	50.51	27.96	35.14	109	00:12:51
00:13:10	34.13	50.57	27.95	35.13	110	00:12:52
00:13:11	34.14	50.54	27.96	35.14	110	00:12:53
00:13:12	34.14	50.45	27.96	35.14	110	00:12:54
00:13:13	34.15	50.32	27.97	35.15	111	00:12:55
00:13:14	34.16	50.19	27.96	35.16	113	00:12:56
00:13:15	34.17	50.16	27.98	35.17	113	00:12:57
00:13:16	34.16	50.12	27.98	35.16	112	00:12:58
00:13:17	34.17	50.03	27.98	35.17	110	00:12:59
00:13:18	34.16	49.99	27.98	35.16	106	00:13:00
00:13:19	34.15	49.93	27.98	35.15	104	00:13:01
00:13:20	34.15	49.93	27.98	35.15	105	00:13:02
00:13:21	34.17	49.93	28	35.17	106	00:13:03
00:13:22	34.17	49.93	28	35.17	109	00:13:04
00:13:23	34.18	49.93	28	35.18	111	00:13:05
00:13:24	34.18	49.93	28	35.18	113	00:13:06
00:13:25	34.18	49.9	28.01	35.18	115	00:13:07
00:13:26	34.16	49.9	28	35.16	117	00:13:08
00:13:27	34.16	49.93	28.01	35.16	116	00:13:09
00:13:28	34.16	49.97	28.02	35.16	111	00:13:10
00:13:29	34.18	49.93	28.02	35.18	108	00:13:11
00:13:30	34.19	50	28.02	35.19	108	00:13:12
00:13:31	34.19	50.07	28.02	35.19	108	00:13:13
00:13:32	34.2	50.06	28.04	35.2	108	00:13:14
00:13:33	34.2	50.13	28.03	35.2	108	00:13:15
00:13:34	34.19	50.16	28.04	35.19	108	00:13:16
00:13:35	34.19	50.2	28.05	35.19	109	00:13:17
00:13:36	34.2	50.2	28.05	35.2	111	00:13:18
00:13:37	34.2	50.26	28.06	35.2	113	00:13:19
00:13:38	34.2	50.26	28.06	35.2	112	00:13:20
00:13:39	34.21	50.33	28.06	35.21	110	00:13:21
00:13:40	34.2	50.46	28.07	35.2	109	00:13:22
00:13:41	34.2	50.56	28.07	35.2	108	00:13:23
00:13:42	34.21	50.52	28.06	35.21	109	00:13:24
00:13:43	34.2	50.53	28.07	35.2	109	00:13:25
00:13:44	34.2	50.46	28.08	35.2	110	00:13:26
00:13:45	34.21	50.46	28.08	35.21	110	00:13:27
00:13:46	34.21	50.53	28.09	35.21	111	00:13:28
00:13:47	34.21	50.56	28.09	35.21	111	00:13:29
00:13:48	34.21	50.62	28.09	35.21	110	00:13:30
00:13:49	34.21	50.66	28.09	35.21	109	00:13:31
00:13:50	34.21	50.69	28.1	35.21	109	00:13:32
00:13:51	34.21	50.72	28.1	35.21	111	00:13:33
00:13:52	34.21	50.72	28.1	35.21	112	00:13:34
00:13:53	34.22	50.79	28.11	35.22	112	00:13:35
00:13:54	34.22	50.86	28.12	35.22	111	00:13:36
00:13:55	34.22	50.79	28.12	35.22	110	00:13:37
00:13:56	34.23	50.73	28.13	35.23	109	00:13:38
00:13:57	34.23	50.7	28.14	35.23	108	00:13:39
00:13:58	34.23	50.66	28.14	35.23	109	00:13:40
00:13:59	34.23	50.63	28.14	35.23	110	00:13:41
00:14:00	34.23	50.63	28.15	35.23	110	00:13:42
00:14:01	34.24	50.66	28.16	35.24	108	00:13:43
00:14:02	34.25	50.7	28.15	35.25	105	00:13:44
00:14:03	34.25	50.89	28.16	35.25	104	00:13:45
00:14:04	34.26	51.05	28.17	35.26	104	00:13:46
00:14:05	34.27	51.22	28.17	35.27	103	00:13:47
00:14:06	34.26	51.32	28.18	35.26	103	00:13:48
00:14:07	34.26	51.44	28.18	35.26	104	00:13:49
00:14:08	34.27	51.58	28.18	35.27	106	00:13:50
00:14:09	34.27	51.61	28.18	35.27	107	00:13:51
00:14:10	34.26	51.58	28.19	35.26	109	00:13:52
00:14:11	34.27	51.58	28.2	35.27	110	00:13:53
00:14:12	34.27	51.64	28.21	35.27	111	00:13:54
00:14:13	34.27	51.71	28.21	35.27	113	00:13:55
00:14:14	34.28	51.74	28.22	35.28	115	00:13:56
00:14:15	34.28	51.45	28.23	35.28	116	00:13:57
00:14:16	34.27	51.49	28.24	35.27	117	00:13:58
00:14:17	34.28	51.65	28.25	35.28	117	00:13:59
00:14:18	34.27	51.65	28.25	35.27	118	00:14:00
00:14:19	34.26	51.45	28.26	35.26	119	00:14:01
00:14:20	34.27	51.07	28.26	35.27	116	00:14:02
00:14:21	34.27	50.68	28.25	35.27	113	00:14:03
00:14:22	34.26	50.45	28.26	35.26	112	00:14:04
00:14:23	34.27	50.55	28.26	35.27	113	00:14:05
00:14:24	34.27	50.65	28.28	35.27	115	00:14:06
00:14:25	34.26	50.65	28.28	35.26	116	00:14:07
00:14:26	34.27	50.68	28.28	35.27	117	00:14:08
00:14:27	34.27	50.68	28.29	35.27	117	00:14:09
00:14:28	34.26	50.81	28.3	35.26	117	00:14:10
00:14:29	34.27	51.04	28.3	35.27	116	00:14:11
00:14:30	34.27	51.14	28.32	35.27	115	00:14:12
00:14:31	34.27	51.04	28.31	35.27	112	00:14:13
00:14:33	34.27	50.68	28.28	35.27	109	00:14:14
00:14:34	34.27	50.49	28.3	35.27	104	00:14:15
00:14:35	34.27	50.23	28.31	35.27	105	00:14:16
00:14:36	34.26	49.97	28.31	35.26	107	00:14:17
00:14:37	34.26	49.78	28.32	35.26	104	00:14:18
00:14:38	34.27	49.65	28.33	35.27	100	00:14:19
00:14:39	34.27	49.58	28.32	35.27	101	00:14:20
00:14:40	34.26	49.88	28.33	35.26	102	00:14:21
00:14:41	34.27	49.91	28.34	35.27	102	00:14:22
00:14:42	34.26	49.88	28.35	35.26	101	00:14:23
00:14:43	34.25	49.85	28.36	35.25	101	00:14:24
00:14:44	34.24	49.75	28.34	35.24	103	00:14:25
00:14:45	34.23	49.59	28.35	35.23	104	00:14:26
00:14:46	34.22	49.59	28.36	35.22	106	00:14:27
00:14:47	34.22	49.52	28.38	35.22	109	00:14:28
00:14:48	34.22	49.46	28.37	35.22	112	00:14:29
00:14:49	34.22	49.39	28.37	35.22	112	00:14:30
00:14:50	34.23	49.23	28.37	35.23	113	00:14:31
00:14:51	34.23	49.1	28.38	35.23	112	00:14:32
00:14:52	34.23	49.1	28.38	35.23	106	00:14:33
00:14:53	34.23	49.14	28.38	35.23	100	00:14:34
00:14:54	34.23	49.27	28.4	35.23	95	00:14:35
00:14:55	34.22	49.36	28.4	35.22	94	00:14:36
00:14:56	34.22	49.59	28.41	35.22	96	00:14:37
00:14:57	34.21	49.85	28.42	35.21	99	00:14:38
00:14:58	34.21	49.86	28.43	35.21	102	00:14:39
00:14:59	34.21	49.72	28.43	35.21	104	00:14:40
00:15:00	34.22	49.5	28.43	35.22	106	00:14:41
00:15:01	34.22	49.27	28.42	35.22	108	00:14:42
00:15:02	34.22	49.07	28.42	35.22	109	00:14:43
00:15:03	34.22	48.88	28.41	35.22	107	00:14:44
00:15:04	34.22	48.84	28.42	35.22	107	00:14:45
00:15:05	34.21	48.75	28.42	35.21	107	00:14:46
00:15:06	34.21	48.68	28.43	35.21	110	00:14:47
00:15:07	34.21	48.62	28.44	35.21	110	00:14:48
00:15:08	34.21	48.65	28.44	35.21	109	00:14:49
00:15:09	34.21	48.75	28.44	35.21	109	00:14:50
00:15:10	34.21	49.21	28.46	35.21	109	00:14:51
00:15:11	34.21	49.5	28.46	35.21	110	00:14:52
00:15:12	34.22	49.67	28.46	35.22	110	00:14:53
00:15:13	34.22	49.8	28.47	35.22	111	00:14:54
00:15:14	34.22	50.02	28.47	35.22	109	00:14:55
00:15:15	34.22	50.38	28.49	35.22	105	00:14:56
00:15:16	34.22	50.71	28.5	35.22	100	00:14:57
00:15:17	34.22	50.97	28.5	35.22	96	00:14:58
00:15:18	34.22	50.91	28.5	35.22	94	00:14:59
00:15:19	34.21	50.84	28.51	35.21	94	00:15:00
00:15:20	34.2	50.81	28.51	35.2	96	00:15:01
00:15:21	34.19	50.81	28.51	35.19	100	00:15:02
00:15:22	34.2	50.81	28.53	35.2	103	00:15:03
00:15:23	34.2	50.71	28.52	35.2	104	00:15:04
00:15:24	34.2	50.32	28.52	35.2	105	00:15:05
00:15:25	34.21	49.93	28.53	35.21	107	00:15:06
00:15:26	34.21	49.68	28.54	35.21	109	00:15:07
00:15:27	34.19	49.55	28.54	35.19	111	00:15:08
00:15:28	34.18	49.35	28.54	35.18	112	00:15:09
00:15:29	34.19	48.96	28.54	35.19	110	00:15:10
00:15:30	34.18	48.79	28.54	35.18	106	00:15:11
00:15:31	34.18	48.82	28.54	35.18	102	00:15:12
00:15:32	34.18	48.89	28.54	35.18	98	00:15:13
00:15:33	34.18	48.92	28.55	35.18	92	00:15:14
00:15:34	34.18	48.89	28.54	35.18	87	00:15:15
00:15:35	34.18	48.89	28.56	35.18	88	00:15:16
00:15:36	34.18	48.83	28.56	35.18	92	00:15:17
00:15:37	34.18	48.83	28.55	35.18	96	00:15:18
00:15:38	34.18	48.8	28.57	35.18	102	00:15:19
00:15:39	34.18	48.76	28.57	35.18	105	00:15:20
00:15:40	34.18	48.83	28.56	35.18	108	00:15:21
00:15:41	34.18	48.99	28.58	35.18	110	00:15:22
00:15:42	34.18	49.26	28.58	35.18	113	00:15:23
00:15:43	34.18	49.42	28.58	35.18	113	00:15:24
00:15:44	34.18	49.39	28.59	35.18	112	00:15:25
00:15:45	34.18	49.32	28.61	35.18	107	00:15:26
00:15:46	34.18	49.19	28.59	35.18	103	00:15:27
00:15:47	34.17	49.42	28.61	35.17	98	00:15:28
00:15:48	34.17	49.69	28.61	35.17	94	00:15:29
00:15:49	34.17	49.59	28.61	35.17	95	00:15:30
00:15:50	34.18	49.19	28.62	35.18	98	00:15:31
00:15:51	34.18	48.93	28.62	35.18	100	00:15:32
00:15:52	34.18	49	28.63	35.18	102	00:15:33
00:15:53	34.19	49.36	28.63	35.19	103	00:15:34
00:15:54	34.19	49.88	28.64	35.19	104	00:15:35
00:15:55	34.18	50.15	28.64	35.18	104	00:15:36
00:15:56	34.18	50.27	28.65	35.18	105	00:15:37
00:15:57	34.18	50.34	28.66	35.18	104	00:15:38
00:15:58	34.18	50.02	28.66	35.18	103	00:15:39
00:15:59	34.16	49.59	28.65	35.16	104	00:15:40
00:16:00	34.16	49.3	28.66	35.16	103	00:15:41
00:16:01	34.16	49.23	28.66	35.16	103	00:15:42
00:16:02	34.16	49.3	28.68	35.16	104	00:15:43
00:16:03	34.16	49.3	28.67	35.16	104	00:15:44
00:16:04	34.18	49.24	28.67	35.18	104	00:15:45
00:16:05	34.18	49.14	28.68	35.18	103	00:15:46
00:16:06	34.18	49.01	28.68	35.18	98	00:15:47
00:16:07	34.18	48.91	28.68	35.18	95	00:15:48
00:16:08	34.18	48.84	28.69	35.18	94	00:15:49
00:16:09	34.18	48.84	28.69	35.18	97	00:15:50
00:16:10	34.18	48.78	28.69	35.18	102	00:15:51
00:16:11	34.17	48.68	28.69	35.17	105	00:15:52
00:16:12	34.17	48.62	28.7	35.17	106	00:15:53
00:16:13	34.17	48.55	28.71	35.17	104	00:15:54
00:16:14	34.17	48.52	28.72	35.17	101	00:15:55
00:16:15	34.17	48.42	28.71	35.17	97	00:15:56
00:16:16	34.17	48.09	28.71	35.17	98	00:15:57
00:16:17	34.18	48	28.71	35.18	100	00:15:58
00:16:18	34.18	48.06	28.72	35.18	101	00:15:59
00:16:19	34.18	48.19	28.72	35.18	102	00:16:00
00:16:20	34.19	48.26	28.72	35.19	102	00:16:01
00:16:21	34.19	48.36	28.72	35.19	103	00:16:02
00:16:22	34.19	48.39	28.72	35.19	101	00:16:03
00:16:23	34.2	48.46	28.73	35.2	99	00:16:04
00:16:24	34.2	48.56	28.74	35.2	97	00:16:05
00:16:25	34.2	48.65	28.74	35.2	93	00:16:06
00:16:26	34.21	48.72	28.74	35.21	87	00:16:07
00:16:27	34.21	48.72	28.74	35.21	83	00:16:08
00:16:28	34.2	48.69	28.74	35.2	83	00:16:09
00:16:29	34.21	48.59	28.76	35.21	88	00:16:10
00:16:30	34.22	48.52	28.75	35.22	95	00:16:11
00:16:31	34.21	48.46	28.76	35.21	99	00:16:12
00:16:32	34.21	48.53	28.76	35.21	103	00:16:13
00:16:33	34.21	48.79	28.76	35.21	103	00:16:14
00:16:34	34.2	48.92	28.77	35.2	102	00:16:15
00:16:35	34.19	48.82	28.77	35.19	101	00:16:16
00:16:36	34.19	48.46	28.78	35.19	100	00:16:17
00:16:37	34.18	48.2	28.78	35.18	100	00:16:18
00:16:38	34.18	48	28.78	35.18	102	00:16:19
00:16:39	34.19	47.8	28.77	35.19	103	00:16:20
00:16:40	34.19	47.61	28.78	35.19	105	00:16:21
00:16:41	34.19	47.41	28.79	35.19	107	00:16:22
00:16:42	34.19	47.28	28.78	35.19	109	00:16:23
00:16:43	34.19	47.31	28.8	35.19	108	00:16:24
00:16:44	34.18	47.41	28.79	35.18	104	00:16:25
00:16:45	34.18	47.61	28.8	35.18	101	00:16:26
00:16:46	34.18	47.68	28.8	35.18	98	00:16:27
00:16:47	34.18	47.74	28.81	35.18	94	00:16:28
00:16:48	34.19	47.81	28.81	35.19	87	00:16:29
00:16:49	34.18	47.84	28.82	35.18	85	00:16:30
00:16:50	34.19	47.88	28.82	35.19	88	00:16:31
00:16:51	34.19	47.84	28.83	35.19	92	00:16:32
00:16:52	34.19	47.81	28.83	35.19	97	00:16:33
00:16:53	34.19	47.81	28.83	35.19	99	00:16:34
00:16:54	34.19	47.88	28.84	35.19	100	00:16:35
00:16:55	34.18	48.04	28.83	35.18	100	00:16:36
00:16:56	34.18	47.98	28.84	35.18	97	00:16:37
00:16:57	34.18	47.68	28.83	35.18	95	00:16:38
00:16:58	34.17	47.35	28.84	35.17	91	00:16:39
00:16:59	34.16	47.35	28.85	35.16	90	00:16:40
00:17:00	34.16	47.35	28.84	35.16	91	00:16:41
00:17:01	34.15	47.12	28.84	35.15	91	00:16:42
00:17:02	34.14	46.79	28.84	35.14	93	00:16:43
00:17:03	34.15	46.52	28.86	35.15	94	00:16:44
00:17:04	34.16	46.32	28.84	35.16	97	00:16:45
00:17:05	34.16	46.22	28.85	35.16	98	00:16:46
00:17:06	34.17	46.26	28.86	35.17	99	00:16:47
00:17:07	34.18	46.19	28.87	35.18	96	00:16:48
00:17:08	34.18	46.29	28.87	35.18	94	00:16:49
00:17:09	34.17	46.49	28.88	35.17	94	00:16:50
00:17:10	34.15	46.69	28.86	35.15	95	00:16:51
00:17:11	34.13	46.86	28.88	35.13	95	00:16:52
00:17:12	34.11	46.92	28.89	35.11	97	00:16:53
00:17:13	34.08	47.03	28.89	35.08	98	00:16:54
00:17:14	34.06	47.55	28.89	35.06	99	00:16:55
00:17:15	34.04	47.92	28.91	35.04	100	00:16:56
00:17:16	34.03	47.89	28.9	35.03	100	00:16:57
00:17:17	34.02	47.75	28.91	35.02	100	00:16:58
00:17:18	34.02	47.75	28.91	35.02	99	00:16:59
00:17:19	34.01	48.02	28.92	35.01	97	00:17:00
00:17:20	34.02	48.25	28.92	35.02	94	00:17:01
00:17:21	34.02	48.55	28.92	35.02	94	00:17:02
00:17:22	34.03	48.71	28.92	35.03	95	00:17:03
00:17:23	34.04	48.81	28.94	35.04	97	00:17:04
00:17:24	34.04	48.81	28.94	35.04	98	00:17:05
00:17:25	34.04	48.45	28.93	35.04	99	00:17:06
00:17:26	34.04	48.09	28.94	35.04	100	00:17:07
00:17:27	34.04	47.66	28.94	35.04	101	00:17:08
00:17:28	34.04	47.26	28.93	35.04	100	00:17:09
00:17:29	34.04	47.13	28.93	35.04	102	00:17:10
00:17:30	34.04	47.16	28.94	35.04	106	00:17:11
00:17:31	34.03	47	28.94	35.03	107	00:17:12
00:17:32	34.04	46.77	28.94	35.04	106	00:17:13
00:17:33	34.03	46.73	28.94	35.03	101	00:17:14
00:17:34	34.02	46.77	28.94	35.02	97	00:17:15
00:17:35	34.01	46.63	28.94	35.01	93	00:17:16
00:17:36	34	46.7	28.95	35	93	00:17:17
00:17:37	33.99	46.9	28.96	34.99	93	00:17:18
00:17:38	33.99	47.1	28.95	34.99	92	00:17:19
00:17:39	33.99	47.17	28.96	34.99	93	00:17:20
00:17:40	33.98	46.97	28.97	34.98	96	00:17:21
00:17:41	33.98	46.77	28.96	34.98	98	00:17:22
00:17:42	33.97	47.03	28.96	34.97	101	00:17:23
00:17:43	33.96	47.23	28.96	34.96	102	00:17:24
00:17:44	33.96	47.23	28.96	34.96	104	00:17:25
00:17:45	33.96	47	28.96	34.96	106	00:17:26
00:17:46	33.96	46.84	28.96	34.96	105	00:17:27
00:17:47	33.96	46.9	28.97	34.96	100	00:17:28
00:17:48	33.96	47.04	28.98	34.96	97	00:17:29
00:17:49	33.95	47.04	28.97	34.95	100	00:17:30
00:17:50	33.96	46.94	28.98	34.96	102	00:17:31
00:17:51	33.96	46.77	28.97	34.96	104	00:17:32
00:17:52	33.96	46.74	28.98	34.96	107	00:17:33
00:17:53	33.97	46.94	29	34.97	109	00:17:34
00:17:54	33.97	46.84	28.99	34.97	112	00:17:35
00:17:55	33.97	47.04	28.99	34.97	114	00:17:36
00:17:56	33.96	47.4	29	34.96	116	00:17:37
00:17:57	33.96	47.63	29.01	34.96	117	00:17:38
00:17:58	33.95	47.6	29.01	34.95	118	00:17:39
00:17:59	33.96	47.47	29.01	34.96	116	00:17:40
00:18:00	33.95	47.5	29.01	34.95	115	00:17:41
00:18:01	33.95	47.57	29.02	34.95	113	00:17:42
00:18:02	33.94	47.57	29.03	34.94	111	00:17:43
00:18:03	33.94	47.47	29.02	34.94	106	00:17:44
00:18:04	33.94	47.44	29.02	34.94	101	00:17:45
00:18:05	33.95	47.47	29.02	34.95	101	00:17:46
00:18:06	33.95	47.44	29.03	34.95	100	00:17:47
00:18:07	33.96	47.34	29.04	34.96	99	00:17:48
00:18:08	33.96	47.17	29.04	34.96	99	00:17:49
00:18:09	33.96	46.94	29.03	34.96	99	00:17:50
00:18:10	33.96	46.71	29.04	34.96	99	00:17:51
00:18:11	33.95	46.61	29.03	34.95	100	00:17:52
00:18:12	33.95	46.61	29.04	34.95	101	00:17:53
00:18:13	33.94	46.58	29.04	34.94	103	00:17:54
00:18:14	33.95	46.31	29.04	34.95	103	00:17:55
00:18:15	33.94	46.02	29.04	34.94	103	00:17:56
00:18:16	33.95	46.02	29.03	34.95	103	00:17:57
00:18:17	33.95	46.12	29.06	34.95	104	00:17:58
00:18:18	33.95	46.22	29.06	34.95	105	00:17:59
00:18:19	33.95	46.05	29.06	34.95	107	00:18:00
00:18:20	33.96	45.88	29.04	34.96	107	00:18:01
00:18:21	33.96	45.82	29.06	34.96	107	00:18:02
00:18:22	33.95	45.75	29.06	34.95	106	00:18:03
00:18:23	33.96	45.85	29.06	34.96	106	00:18:04
00:18:24	33.96	45.99	29.07	34.96	102	00:18:05
00:18:25	33.96	46.09	29.07	34.96	98	00:18:06
00:18:26	33.95	46.12	29.06	34.95	97	00:18:07
00:18:27	33.95	46.05	29.08	34.95	98	00:18:08
00:18:28	33.93	46.25	29.07	34.93	99	00:18:09
00:18:29	33.91	46.15	29.08	34.91	102	00:18:10
00:18:30	33.89	45.85	29.08	34.89	103	00:18:11
00:18:31	33.88	45.65	29.08	34.88	105	00:18:12
00:18:32	33.88	45.38	29.08	34.88	107	00:18:13
00:18:33	33.87	44.99	29.08	34.87	108	00:18:14
00:18:35	33.88	44.38	29.03	34.88	107	00:18:15
00:18:36	33.89	44.11	29.05	34.89	106	00:18:16
00:18:37	33.9	43.84	29.05	34.9	106	00:18:17
00:18:38	33.92	43.64	29.06	34.92	105	00:18:18
00:18:39	33.93	43.47	29.04	34.93	106	00:18:19
00:18:40	33.93	43.24	29.07	34.93	106	00:18:20
00:18:41	33.91	43.03	29.06	34.91	101	00:18:21
00:18:42	33.9	43.03	29.06	34.9	96	00:18:22
00:18:43	33.89	43.17	29.06	34.89	92	00:18:23
00:18:44	33.87	43.34	29.07	34.87	95	00:18:24
00:18:45	33.86	43.58	29.08	34.86	97	00:18:25
00:18:46	33.85	43.78	29.09	34.85	97	00:18:26
00:18:47	33.85	43.98	29.08	34.85	95	00:18:27
00:18:48	33.84	44.11	29.09	34.84	94	00:18:28
00:18:49	33.84	44.25	29.09	34.84	97	00:18:29
00:18:50	33.85	44.32	29.08	34.85	98	00:18:30
00:18:51	33.85	44.35	29.09	34.85	97	00:18:31
00:18:52	33.84	44.39	29.11	34.84	95	00:18:32
00:18:53	33.84	44.55	29.1	34.84	90	00:18:33
00:18:54	33.85	44.59	29.1	34.85	86	00:18:34
00:18:55	33.84	44.65	29.1	34.84	87	00:18:35
00:18:56	33.84	44.82	29.11	34.84	89	00:18:36
00:18:57	33.85	44.95	29.12	34.85	91	00:18:37
00:18:58	33.85	45.06	29.12	34.85	95	00:18:38
00:18:59	33.85	45.22	29.11	34.85	96	00:18:39
00:19:00	33.86	45.26	29.12	34.86	96	00:18:40
00:19:01	33.86	45.29	29.12	34.86	96	00:18:41
00:19:02	33.86	45.33	29.13	34.86	94	00:18:42
00:19:03	33.85	45.33	29.13	34.85	92	00:18:43
00:19:04	33.84	45.39	29.13	34.84	92	00:18:44
00:19:05	33.84	45.43	29.13	34.84	94	00:18:45
00:19:06	33.84	45.43	29.13	34.84	95	00:18:46
00:19:07	33.85	45.46	29.13	34.85	96	00:18:47
00:19:08	33.87	45.46	29.15	34.87	97	00:18:48
00:19:09	33.9	45.49	29.13	34.9	96	00:18:49
00:19:10	33.91	45.49	29.14	34.91	95	00:18:50
00:19:11	33.93	45.49	29.15	34.93	96	00:18:51
00:19:12	33.94	45.49	29.15	34.94	97	00:18:52
00:19:13	33.95	45.43	29.14	34.95	98	00:18:53
00:19:14	33.95	45.39	29.14	34.95	100	00:18:54
00:19:15	33.96	45.46	29.15	34.96	102	00:18:55
00:19:16	33.97	45.46	29.15	34.97	103	00:18:56
00:19:17	33.96	45.46	29.15	34.96	98	00:18:57
00:19:18	33.95	45.43	29.14	34.95	93	00:18:58
00:19:19	33.95	45.46	29.16	34.95	94	00:18:59
00:19:20	33.94	45.5	29.16	34.94	99	00:19:00
00:19:21	33.93	45.53	29.16	34.93	103	00:19:01
00:19:22	33.93	45.46	29.17	34.93	105	00:19:02
00:19:23	33.93	45.36	29.17	34.93	107	00:19:03
00:19:24	33.92	45.33	29.16	34.92	108	00:19:04
00:19:25	33.92	45.4	29.17	34.92	110	00:19:05
00:19:26	33.93	45.53	29.17	34.93	111	00:19:06
00:19:27	33.93	45.63	29.17	34.93	110	00:19:07
00:19:28	33.93	45.7	29.17	34.93	106	00:19:08
00:19:29	33.94	45.77	29.17	34.94	103	00:19:09
00:19:30	33.94	45.8	29.18	34.94	100	00:19:10
00:19:31	33.93	45.8	29.18	34.93	94	00:19:11
00:19:32	33.93	45.8	29.18	34.93	91	00:19:12
00:19:33	33.93	45.7	29.19	34.93	94	00:19:13
00:19:34	33.93	45.57	29.19	34.93	98	00:19:14
00:19:35	33.94	45.4	29.19	34.94	101	00:19:15
00:19:36	33.94	45.23	29.19	34.94	102	00:19:16
00:19:37	33.94	45.23	29.21	34.94	103	00:19:17
00:19:38	33.93	45.2	29.2	34.93	105	00:19:18
00:19:39	33.93	44.93	29.21	34.93	106	00:19:19
00:19:40	33.92	44.87	29.21	34.92	106	00:19:20
00:19:41	33.92	45.03	29.2	34.92	107	00:19:21
00:19:42	33.92	45.2	29.2	34.92	106	00:19:22
00:19:43	33.92	45.13	29.2	34.92	107	00:19:23
00:19:44	33.92	45.07	29.19	34.92	107	00:19:24
00:19:45	33.93	45.13	29.2	34.93	108	00:19:25
00:19:46	33.93	45.07	29.2	34.93	109	00:19:26
00:19:47	33.93	44.86	29.19	34.93	112	00:19:27
00:19:48	33.93	44.66	29.19	34.93	114	00:19:28
00:19:49	33.93	44.6	29.2	34.93	115	00:19:29
00:19:50	33.92	44.66	29.2	34.92	112	00:19:30
00:19:51	33.92	44.8	29.19	34.92	107	00:19:31
00:19:52	33.92	44.93	29.2	34.92	102	00:19:32
00:19:53	33.92	45.1	29.19	34.92	98	00:19:33
00:19:54	33.91	45.27	29.21	34.91	94	00:19:34
00:19:55	33.9	45.4	29.22	34.9	88	00:19:35
00:19:56	33.9	45.4	29.2	34.9	87	00:19:36
00:19:57	33.91	45.5	29.21	34.91	90	00:19:37
00:19:58	33.91	45.67	29.21	34.91	95	00:19:38
00:19:59	33.92	45.87	29.22	34.92	101	00:19:39
00:20:00	33.92	46	29.22	34.92	106	00:19:40
00:20:01	33.92	46.07	29.23	34.92	108	00:19:41
00:20:02	33.92	46.07	29.23	34.92	109	00:19:42
00:20:03	33.93	45.94	29.23	34.93	111	00:19:43
00:20:04	33.93	45.94	29.25	34.93	113	00:19:44
00:20:05	33.94	46.07	29.24	34.94	114	00:19:45
00:20:06	33.94	46.14	29.24	34.94	107	00:19:46
00:20:07	33.93	46.2	29.24	34.93	103	00:19:47
00:20:08	33.91	46.41	29.24	34.91	100	00:19:48
00:20:09	33.91	46.64	29.25	34.91	95	00:19:49
00:20:10	33.9	47	29.26	34.9	89	00:19:50
00:20:12	33.86	47.2	29.22	34.86	83	00:19:51
00:20:13	33.85	47	29.25	34.85	83	00:19:52
00:20:14	33.85	46.9	29.26	34.85	86	00:19:53
00:20:15	33.85	46.81	29.25	34.85	91	00:19:54
00:20:16	33.86	46.94	29.26	34.86	94	00:19:55
00:20:17	33.87	46.94	29.26	34.87	96	00:19:56
00:20:18	33.89	46.74	29.26	34.89	98	00:19:57
00:20:19	33.89	46.61	29.26	34.89	98	00:19:58
00:20:20	33.88	46.61	29.27	34.88	100	00:19:59
00:20:21	33.88	46.61	29.27	34.88	99	00:20:00
00:20:22	33.89	46.58	29.29	34.89	99	00:20:01
00:20:23	33.89	46.61	29.28	34.89	100	00:20:02
00:20:24	33.9	46.54	29.28	34.9	101	00:20:03
00:20:25	33.91	46.41	29.28	34.91	98	00:20:04
00:20:26	33.91	46.34	29.29	34.91	96	00:20:05
00:20:27	33.91	46.38	29.3	34.91	98	00:20:06
00:20:28	33.91	46.28	29.29	34.91	100	00:20:07
00:20:29	33.91	46.24	29.31	34.91	101	00:20:08
00:20:30	33.92	46.15	29.3	34.92	102	00:20:09
00:20:31	33.93	46.08	29.3	34.93	101	00:20:10
00:20:32	33.94	46.01	29.3	34.94	100	00:20:11
00:20:33	33.94	46.01	29.3	34.94	101	00:20:12
00:20:34	33.95	45.98	29.31	34.95	102	00:20:13
00:20:35	33.95	45.95	29.3	34.95	101	00:20:14
00:20:36	33.94	45.88	29.32	34.94	102	00:20:15
00:20:37	33.94	45.95	29.32	34.94	102	00:20:16
00:20:38	33.95	46.08	29.32	34.95	102	00:20:17
00:20:39	33.95	45.88	29.32	34.95	101	00:20:18
00:20:40	33.95	45.82	29.31	34.95	101	00:20:19
00:20:41	33.96	45.85	29.32	34.96	101	00:20:20
00:20:42	33.96	45.75	29.33	34.96	101	00:20:21
00:20:43	33.96	45.62	29.33	34.96	100	00:20:22
00:20:44	33.96	45.52	29.34	34.96	100	00:20:23
00:20:45	33.96	45.45	29.33	34.96	102	00:20:24
00:20:46	33.96	45.55	29.34	34.96	104	00:20:25
00:20:47	33.96	45.55	29.35	34.96	105	00:20:26
00:20:48	33.97	45.48	29.33	34.97	106	00:20:27
00:20:49	33.96	45.45	29.32	34.96	107	00:20:28
00:20:50	33.97	45.35	29.33	34.97	107	00:20:29
00:20:51	33.97	45.25	29.34	34.97	109	00:20:30
00:20:52	33.96	45.42	29.35	34.96	111	00:20:31
00:20:53	33.96	45.52	29.35	34.96	112	00:20:32
00:20:54	33.96	45.45	29.34	34.96	113	00:20:33
00:20:55	33.98	45.35	29.34	34.98	110	00:20:34
00:20:56	33.99	45.28	29.34	34.99	109	00:20:35
00:20:57	34	45.22	29.35	35	109	00:20:36
00:20:58	33.99	45.25	29.36	34.99	111	00:20:37
00:20:59	34	45.39	29.36	35	112	00:20:38
00:21:00	33.99	45.72	29.37	34.99	111	00:20:39
00:21:01	33.99	45.89	29.37	34.99	110	00:20:40
00:21:02	33.99	45.99	29.37	34.99	109	00:20:41
00:21:03	34	46.02	29.38	35	109	00:20:42
00:21:04	34	46.02	29.38	35	108	00:20:43
00:21:05	34	45.99	29.38	35	108	00:20:44
00:21:06	34	45.96	29.38	35	107	00:20:45
00:21:07	34	46.02	29.38	35	105	00:20:46
00:21:08	34.01	46.12	29.39	35.01	104	00:20:47
00:21:09	34.01	45.95	29.38	35.01	101	00:20:48
00:21:10	34.01	45.96	29.38	35.01	100	00:20:49
00:21:11	34.01	45.82	29.38	35.01	100	00:20:50
00:21:12	34.01	46.02	29.38	35.01	100	00:20:51
00:21:13	34	46.29	29.39	35	102	00:20:52
00:21:14	34.01	46.49	29.4	35.01	104	00:20:53
00:21:15	34.01	46.52	29.41	35.01	105	00:20:54
00:21:16	34.01	46.62	29.4	35.01	105	00:20:55
00:21:17	34.01	46.49	29.4	35.01	101	00:20:56
00:21:18	34.02	46.26	29.41	35.02	98	00:20:57
00:21:19	34.01	46.16	29.4	35.01	98	00:20:58
00:21:20	34.02	46.06	29.39	35.02	99	00:20:59
00:21:21	34.03	46.03	29.42	35.03	101	00:21:00
00:21:22	34.03	46.13	29.42	35.03	104	00:21:01
00:21:23	34.04	46.19	29.43	35.04	104	00:21:02
00:21:24	34.04	46.09	29.43	35.04	103	00:21:03
00:21:25	34.04	46.13	29.44	35.04	102	00:21:04
00:21:26	34.04	46.16	29.43	35.04	101	00:21:05
00:21:27	34.04	46.2	29.45	35.04	101	00:21:06
00:21:28	34.03	46.23	29.44	35.03	101	00:21:07
00:21:29	34.04	46.26	29.44	35.04	102	00:21:08
00:21:30	34.04	46.29	29.44	35.04	104	00:21:09
00:21:31	34.03	46.43	29.44	35.03	108	00:21:10
00:21:32	34.04	46.43	29.43	35.04	106	00:21:11
00:21:33	34.05	46.36	29.45	35.05	102	00:21:12
00:21:34	34.05	46.23	29.45	35.05	97	00:21:13
00:21:35	34.06	46.1	29.45	35.06	96	00:21:14
00:21:36	34.06	46.1	29.45	35.06	97	00:21:15
00:21:37	34.06	46.06	29.45	35.06	98	00:21:16
00:21:38	34.05	46.03	29.46	35.05	100	00:21:17
00:21:39	34.05	46.06	29.46	35.05	102	00:21:18
00:21:40	34.04	46.2	29.46	35.04	102	00:21:19
00:21:41	34.05	46.37	29.46	35.05	102	00:21:20
00:21:42	34.05	46.26	29.46	35.05	103	00:21:21
00:21:43	34.05	46.03	29.48	35.05	104	00:21:22
00:21:44	34.05	46.13	29.48	35.05	103	00:21:23
00:21:45	34.06	46.3	29.48	35.06	98	00:21:24
00:21:46	34.06	46.33	29.48	35.06	94	00:21:25
00:21:47	34.06	46.3	29.49	35.06	94	00:21:26
00:21:48	34.06	46.23	29.49	35.06	97	00:21:27
00:21:49	34.08	46.17	29.49	35.08	100	00:21:28
00:21:50	34.08	46.33	29.49	35.08	100	00:21:29
00:21:51	34.07	46.67	29.49	35.07	97	00:21:30
00:21:52	34.08	46.9	29.5	35.08	96	00:21:31
00:21:53	34.09	46.97	29.5	35.09	98	00:21:32
00:21:54	34.08	46.93	29.51	35.08	98	00:21:33
00:21:55	34.09	47.1	29.5	35.09	100	00:21:34
00:21:56	34.1	47	29.5	35.1	101	00:21:35
00:21:57	34.09	46.84	29.5	35.09	101	00:21:36
00:21:58	34.08	46.6	29.51	35.08	102	00:21:37
00:21:59	34.08	46.4	29.51	35.08	102	00:21:38
00:22:00	34.07	46.34	29.5	35.07	103	00:21:39
00:22:01	34.07	46.57	29.52	35.07	104	00:21:40
00:22:02	34.08	46.7	29.53	35.08	105	00:21:41
00:22:03	34.09	46.64	29.53	35.09	106	00:21:42
00:22:04	34.09	46.54	29.53	35.09	106	00:21:43
00:22:05	34.09	46.4	29.53	35.09	107	00:21:44
00:22:06	34.09	46.34	29.52	35.09	107	00:21:45
00:22:07	34.09	46.17	29.54	35.09	107	00:21:46
00:22:08	34.09	46.11	29.52	35.09	108	00:21:47
00:22:09	34.09	46.24	29.54	35.09	108	00:21:48
00:22:10	34.09	46.37	29.53	35.09	106	00:21:49
00:22:11	34.09	46.37	29.54	35.09	103	00:21:50
00:22:12	34.1	46.31	29.54	35.1	102	00:21:51
00:22:13	34.1	46.21	29.55	35.1	103	00:21:52
00:22:14	34.09	46.11	29.55	35.09	106	00:21:53
00:22:15	34.09	46.04	29.55	35.09	108	00:21:54
00:22:16	34.09	45.98	29.55	35.09	108	00:21:55
00:22:17	34.08	45.88	29.55	35.08	110	00:21:56
00:22:18	34.08	46.01	29.57	35.08	109	00:21:57
00:22:19	34.09	46.01	29.56	35.09	107	00:21:58
00:22:20	34.09	45.98	29.58	35.09	101	00:21:59
00:22:21	34.09	46.18	29.57	35.09	96	00:22:00
00:22:22	34.09	46.21	29.57	35.09	91	00:22:01
00:22:23	34.1	45.98	29.57	35.1	87	00:22:02
00:22:24	34.11	46.01	29.57	35.11	87	00:22:03
00:22:25	34.12	46.11	29.57	35.12	91	00:22:04
00:22:26	34.13	46.11	29.57	35.13	95	00:22:05
00:22:27	34.13	46.04	29.58	35.13	97	00:22:06
00:22:28	34.12	45.71	29.57	35.12	100	00:22:07
00:22:29	34.11	45.44	29.57	35.11	102	00:22:08
00:22:30	34.11	45.28	29.58	35.11	104	00:22:09
00:22:31	34.1	45.04	29.56	35.1	105	00:22:10
00:22:32	34.11	44.77	29.56	35.11	105	00:22:11
00:22:33	34.11	44.61	29.57	35.11	106	00:22:12
00:22:34	34.11	44.4	29.55	35.11	108	00:22:13
00:22:35	34.1	44.24	29.56	35.1	110	00:22:14
00:22:36	34.1	44.1	29.57	35.1	111	00:22:15
00:22:37	34.09	43.97	29.55	35.09	112	00:22:16
00:22:38	34.09	43.83	29.57	35.09	113	00:22:17
00:22:39	34.09	43.77	29.56	35.09	114	00:22:18
00:22:40	34.09	43.7	29.56	35.09	114	00:22:19
00:22:41	34.09	43.66	29.56	35.09	114	00:22:20
00:22:42	34.09	43.63	29.56	35.09	114	00:22:21
00:22:43	34.08	43.63	29.56	35.08	114	00:22:22
00:22:44	34.07	43.63	29.57	35.07	114	00:22:23
00:22:45	34.06	43.56	29.57	35.06	114	00:22:24
00:22:46	34.05	43.46	29.57	35.05	114	00:22:25
00:22:47	34.03	43.4	29.58	35.03	114	00:22:26
00:22:48	34.03	43.36	29.57	35.03	115	00:22:27
00:22:49	34.03	43.26	29.58	35.03	116	00:22:28
00:22:50	34.03	43.29	29.58	35.03	117	00:22:29
00:22:51	34.03	43.33	29.58	35.03	118	00:22:30
00:22:52	34.03	43.36	29.58	35.03	119	00:22:31
00:22:53	34.04	43.29	29.59	35.04	120	00:22:32
00:22:54	34.03	43.23	29.59	35.03	121	00:22:33
00:22:55	34.03	43.09	29.57	35.03	122	00:22:34
00:22:56	34.02	42.95	29.56	35.02	122	00:22:35
00:22:57	34.02	42.85	29.56	35.02	122	00:22:36
00:22:58	34.01	42.89	29.56	35.01	121	00:22:37
00:22:59	34	42.82	29.56	35	121	00:22:38
00:23:00	33.98	42.75	29.56	34.98	120	00:22:39
00:23:01	33.97	42.68	29.56	34.97	120	00:22:40
00:23:02	33.95	42.48	29.54	34.95	120	00:22:41
00:23:03	33.94	42.41	29.55	34.94	120	00:22:42
00:23:04	33.93	42.44	29.54	34.93	120	00:22:43
00:23:05	33.9	42.41	29.53	34.9	121	00:22:44
00:23:06	33.88	42.34	29.53	34.88	121	00:22:45
00:23:07	33.87	42.34	29.54	34.87	122	00:22:46
00:23:08	33.85	42.27	29.53	34.85	122	00:22:47
00:23:09	33.85	42.2	29.52	34.85	121	00:22:48
00:23:10	33.85	42.13	29.52	34.85	120	00:22:49
00:23:11	33.84	42.03	29.5	34.84	118	00:22:50
00:23:12	33.83	42	29.51	34.83	117	00:22:51
00:23:13	33.83	42.13	29.5	34.83	116	00:22:52
00:23:14	33.81	42.27	29.5	34.81	117	00:22:53
00:23:15	33.81	42.37	29.52	34.81	117	00:22:54
00:23:16	33.8	42.41	29.52	34.8	119	00:22:55
00:23:17	33.8	42.44	29.52	34.8	120	00:22:56
00:23:18	33.78	42.47	29.51	34.78	121	00:22:57
00:23:19	33.78	42.51	29.52	34.78	121	00:22:58
00:23:20	33.77	42.61	29.52	34.77	122	00:22:59
00:23:21	33.77	42.75	29.52	34.77	121	00:23:00
00:23:22	33.76	42.85	29.52	34.76	121	00:23:01
00:23:23	33.75	43.02	29.51	34.75	121	00:23:02
00:23:24	33.74	43.29	29.51	34.74	121	00:23:03
00:23:25	33.73	43.49	29.52	34.73	121	00:23:04
00:23:26	33.71	43.59	29.52	34.71	121	00:23:05
00:23:27	33.71	43.69	29.51	34.71	121	00:23:06
00:23:28	33.71	43.76	29.51	34.71	122	00:23:07
00:23:29	33.71	43.62	29.51	34.71	122	00:23:08
00:23:30	33.7	43.52	29.51	34.7	122	00:23:09
00:23:31	33.7	43.42	29.51	34.7	123	00:23:10
00:23:32	33.68	43.42	29.5	34.68	124	00:23:11
00:23:33	33.67	43.45	29.5	34.67	124	00:23:12
00:23:34	33.67	43.49	29.5	34.67	124	00:23:13
00:23:35	33.66	43.55	29.49	34.66	123	00:23:14
00:23:36	33.64	43.56	29.5	34.64	123	00:23:15
00:23:37	33.64	43.35	29.5	34.64	122	00:23:16
00:23:38	33.63	43.15	29.51	34.63	122	00:23:17
00:23:39	33.63	42.95	29.5	34.63	122	00:23:18
00:23:40	33.63	42.94	29.49	34.63	122	00:23:19
00:23:41	33.62	42.81	29.48	34.62	123	00:23:20
00:23:42	33.6	42.77	29.46	34.6	125	00:23:21
00:23:43	33.6	42.74	29.46	34.6	127	00:23:22
00:23:44	33.58	42.57	29.45	34.58	128	00:23:23
00:23:45	33.57	42.5	29.45	34.57	128	00:23:24
00:23:46	33.57	42.5	29.45	34.57	128	00:23:25
00:23:47	33.57	43.15	29.45	34.57	127	00:23:26
00:23:48	33.57	43.55	29.45	34.57	127	00:23:27
00:23:49	33.57	44.13	29.46	34.57	126	00:23:28
00:23:50	33.55	44.26	29.45	34.55	126	00:23:29
00:23:51	33.55	43.92	29.45	34.55	122	00:23:30
00:23:52	33.54	43.58	29.44	34.54	121	00:23:31
00:23:53	33.51	43.24	29.44	34.51	123	00:23:32
00:23:54	33.5	42.87	29.43	34.5	125	00:23:33
00:23:55	33.49	42.74	29.42	34.49	125	00:23:34
00:23:56	33.48	42.67	29.41	34.48	126	00:23:35
00:23:57	33.47	42.67	29.42	34.47	126	00:23:36
00:23:58	33.47	42.56	29.41	34.47	126	00:23:37
00:23:59	33.46	42.57	29.41	34.46	127	00:23:38
00:24:00	33.46	42.6	29.41	34.46	126	00:23:39
00:24:01	33.46	42.53	29.4	34.46	126	00:23:40
00:24:02	33.45	42.46	29.4	34.45	125	00:23:41
00:24:03	33.43	42.43	29.41	34.43	126	00:23:42
00:24:05	33.38	42.39	29.36	34.38	126	00:23:43
00:24:06	33.35	42.39	29.38	34.35	126	00:23:44
00:24:07	33.33	42.42	29.38	34.33	126	00:23:45
00:24:08	33.31	42.29	29.37	34.31	125	00:23:46
00:24:09	33.31	42.22	29.38	34.31	125	00:23:47
00:24:10	33.31	42.19	29.38	34.31	125	00:23:48
00:24:11	33.31	42.16	29.38	34.31	126	00:23:49
00:24:12	33.31	42.16	29.38	34.31	126	00:23:50
00:24:13	33.31	42.19	29.38	34.31	126	00:23:51
00:24:14	33.29	42.33	29.38	34.29	127	00:23:52
00:24:15	33.28	42.33	29.4	34.28	127	00:23:53
00:24:16	33.28	42.26	29.38	34.28	127	00:23:54
00:24:17	33.28	42.29	29.38	34.28	127	00:23:55
00:24:18	33.28	42.39	29.38	34.28	127	00:23:56
00:24:19	33.27	42.39	29.38	34.27	127	00:23:57
00:24:20	33.26	42.7	29.39	34.26	127	00:23:58
00:24:21	33.25	43.04	29.37	34.25	127	00:23:59
00:24:22	33.25	43.07	29.38	34.25	127	00:24:00
00:24:23	33.24	43	29.38	34.24	127	00:24:01
00:24:24	33.25	42.87	29.37	34.25	127	00:24:02
00:24:25	33.25	42.7	29.38	34.25	126	00:24:03
00:24:26	33.24	42.59	29.37	34.24	126	00:24:04
00:24:27	33.23	42.46	29.36	34.23	125	00:24:05
00:24:28	33.24	42.56	29.36	34.24	124	00:24:06
00:24:29	33.23	42.66	29.36	34.23	123	00:24:07
00:24:30	33.22	42.73	29.36	34.22	122	00:24:08
00:24:31	33.23	42.8	29.36	34.23	122	00:24:09
00:24:32	33.22	42.86	29.35	34.22	121	00:24:10
00:24:33	33.2	43.17	29.35	34.2	121	00:24:11
00:24:34	33.2	43.41	29.36	34.2	123	00:24:12
00:24:35	33.19	43.61	29.36	34.19	124	00:24:13
00:24:36	33.18	43.71	29.37	34.18	125	00:24:14
00:24:37	33.17	43.71	29.37	34.17	127	00:24:15
00:24:38	33.17	43.78	29.36	34.17	126	00:24:16
00:24:39	33.17	43.91	29.38	34.17	121	00:24:17
00:24:40	33.18	44.01	29.36	34.18	117	00:24:18
00:24:41	33.18	44.11	29.38	34.18	114	00:24:19
00:24:42	33.18	43.98	29.36	34.18	109	00:24:20
00:24:43	33.18	43.87	29.36	34.18	98	00:24:21
00:24:44	33.18	43.91	29.33	34.18	91	00:24:22
00:24:45	33.18	43.94	29.34	34.18	89	00:24:23
00:24:46	33.18	43.94	29.32	34.18	91	00:24:24
00:24:47	33.18	44.01	29.32	34.18	96	00:24:25
00:24:48	33.18	44.14	29.31	34.18	102	00:24:26
00:24:49	33.18	44.27	29.3	34.18	104	00:24:27
00:24:50	33.19	44.48	29.3	34.19	106	00:24:28
00:24:51	33.19	44.61	29.3	34.19	109	00:24:29
00:24:52	33.19	44.64	29.3	34.19	111	00:24:30
00:24:53	33.2	44.61	29.3	34.2	115	00:24:31
00:24:54	33.22	44.88	29.31	34.22	118	00:24:32
00:24:55	33.23	45.21	29.32	34.23	120	00:24:33
00:24:56	33.23	45.35	29.32	34.23	121	00:24:34
00:24:57	33.24	45.48	29.32	34.24	124	00:24:35
00:24:58	33.23	46.22	29.33	34.23	125	00:24:36
00:24:59	33.22	46.75	29.33	34.22	122	00:24:37
00:25:00	33.21	46.85	29.34	34.21	119	00:24:38
00:25:01	33.21	46.55	29.33	34.21	117	00:24:39
00:25:02	33.21	46.28	29.34	34.21	109	00:24:40
00:25:03	33.22	46.08	29.34	34.22	104	00:24:41
00:25:04	33.23	45.95	29.34	34.23	105	00:24:42
00:25:05	33.24	45.88	29.33	34.24	107	00:24:43
00:25:06	33.25	46.15	29.34	34.25	110	00:24:44
00:25:07	33.25	46.62	29.34	34.25	114	00:24:45
00:25:08	33.25	46.75	29.35	34.25	117	00:24:46
00:25:09	33.25	46.75	29.34	34.25	115	00:24:47
00:25:10	33.25	46.75	29.34	34.25	111	00:24:48
00:25:11	33.25	46.68	29.34	34.25	108	00:24:49
00:25:12	33.26	46.55	29.34	34.26	105	00:24:50
00:25:13	33.28	46.48	29.34	34.28	101	00:24:51
00:25:14	33.29	46.32	29.34	34.29	97	00:24:52
00:25:15	33.31	46.35	29.34	34.31	97	00:24:53
00:25:16	33.33	46.35	29.33	34.33	99	00:24:54
00:25:17	33.33	46.42	29.34	34.33	102	00:24:55
00:25:18	33.32	46.42	29.34	34.32	106	00:24:56
00:25:19	33.33	46.35	29.34	34.33	109	00:24:57
00:25:20	33.33	46.35	29.35	34.33	111	00:24:58
00:25:21	33.32	46.35	29.34	34.32	111	00:24:59
00:25:22	33.32	46.35	29.34	34.32	113	00:25:00
00:25:23	33.33	46.25	29.35	34.33	115	00:25:01
00:25:24	33.33	46.15	29.34	34.33	116	00:25:02
00:25:25	33.33	46.02	29.35	34.33	115	00:25:03
00:25:26	33.33	46.02	29.35	34.33	114	00:25:04
00:25:27	33.34	46.15	29.34	34.34	113	00:25:05
00:25:28	33.34	46.32	29.34	34.34	111	00:25:06
00:25:29	33.35	46.45	29.36	34.35	112	00:25:07
00:25:30	33.35	46.48	29.35	34.35	114	00:25:08
00:25:31	33.35	46.62	29.37	34.35	114	00:25:09
00:25:32	33.35	46.85	29.36	34.35	114	00:25:10
00:25:33	33.35	47.32	29.36	34.35	113	00:25:11
00:25:34	33.34	47.55	29.38	34.34	108	00:25:12
00:25:35	33.35	47.68	29.38	34.35	104	00:25:13
00:25:36	33.36	47.74	29.38	34.36	100	00:25:14
00:25:37	33.37	47.61	29.37	34.37	96	00:25:15
00:25:38	33.37	47.15	29.37	34.37	97	00:25:16
00:25:39	33.38	46.78	29.36	34.38	101	00:25:17
00:25:40	33.38	46.65	29.37	34.38	105	00:25:18
00:25:41	33.37	47.08	29.37	34.37	108	00:25:19
00:25:42	33.37	47.55	29.37	34.37	109	00:25:20
00:25:43	33.39	47.74	29.36	34.39	108	00:25:21
00:25:44	33.38	48.14	29.37	34.38	104	00:25:22
00:25:45	33.38	48.54	29.39	34.38	102	00:25:23
00:25:46	33.39	48.6	29.38	34.39	102	00:25:24
00:25:47	33.39	48.41	29.37	34.39	105	00:25:25
00:25:48	33.37	48.54	29.4	34.37	107	00:25:26
00:25:49	33.38	48.87	29.4	34.38	110	00:25:27
00:25:50	33.38	49.06	29.39	34.38	112	00:25:28
00:25:51	33.38	49.06	29.4	34.38	113	00:25:29
00:25:52	33.38	48.77	29.39	34.38	112	00:25:30
00:25:53	33.38	48.47	29.4	34.38	109	00:25:31
00:25:54	33.39	48.21	29.38	34.39	104	00:25:32
00:25:55	33.39	48.01	29.39	34.39	101	00:25:33
00:25:56	33.4	48.11	29.4	34.4	95	00:25:34
00:25:57	33.41	48.11	29.39	34.41	94	00:25:35
00:25:58	33.42	48.01	29.39	34.42	97	00:25:36
00:25:59	33.41	47.71	29.38	34.41	103	00:25:37
00:26:00	33.41	47.58	29.38	34.41	107	00:25:38
00:26:01	33.4	47.48	29.39	34.4	109	00:25:39
00:26:02	33.39	47.42	29.39	34.39	111	00:25:40
00:26:03	33.38	47.45	29.39	34.38	113	00:25:41
00:26:04	33.38	47.88	29.39	34.38	113	00:25:42
00:26:05	33.38	48.01	29.4	34.38	111	00:25:43
00:26:06	33.39	47.62	29.41	34.39	110	00:25:44
00:26:07	33.39	47.29	29.4	34.39	109	00:25:45
00:26:08	33.4	47.09	29.39	34.4	110	00:25:46
00:26:09	33.42	46.95	29.4	34.42	110	00:25:47
00:26:10	33.43	46.85	29.4	34.43	109	00:25:48
00:26:11	33.44	46.86	29.41	34.44	107	00:25:49
00:26:12	33.45	46.72	29.41	34.45	102	00:25:50
00:26:13	33.45	46.62	29.41	34.45	97	00:25:51
00:26:14	33.44	46.52	29.41	34.44	93	00:25:52
00:26:15	33.45	46.43	29.42	34.45	92	00:25:53
00:26:16	33.46	46.33	29.42	34.46	94	00:25:54
00:26:17	33.45	46.29	29.42	34.45	96	00:25:55
00:26:18	33.46	46.29	29.43	34.46	98	00:25:56
00:26:19	33.47	46.23	29.42	34.47	101	00:25:57
00:26:20	33.47	46.19	29.42	34.47	103	00:25:58
00:26:21	33.47	46.19	29.43	34.47	106	00:25:59
00:26:22	33.48	46.2	29.43	34.48	109	00:26:00
00:26:23	33.48	46.39	29.43	34.48	109	00:26:01
00:26:24	33.49	46.56	29.42	34.49	106	00:26:02
00:26:25	33.49	46.69	29.44	34.49	102	00:26:03
00:26:26	33.48	46.79	29.44	34.48	97	00:26:04
00:26:27	33.48	46.69	29.43	34.48	95	00:26:05
00:26:28	33.49	46.46	29.44	34.49	96	00:26:06
00:26:29	33.49	46.19	29.42	34.49	98	00:26:07
00:26:30	33.5	46.56	29.42	34.5	99	00:26:08
00:26:31	33.51	46.89	29.43	34.51	101	00:26:09
00:26:32	33.5	47.06	29.43	34.5	104	00:26:10
00:26:33	33.49	47.85	29.44	34.49	106	00:26:11
00:26:34	33.49	48.74	29.44	34.49	108	00:26:12
00:26:35	33.48	49.2	29.44	34.48	109	00:26:13
00:26:36	33.48	49.4	29.46	34.48	109	00:26:14
00:26:37	33.49	49.47	29.47	34.49	107	00:26:15
00:26:38	33.51	49.4	29.46	34.51	105	00:26:16
00:26:39	33.51	49.3	29.45	34.51	104	00:26:17
00:26:40	33.52	48.88	29.46	34.52	104	00:26:18
00:26:41	33.52	48.51	29.46	34.52	105	00:26:19
00:26:42	33.53	48.32	29.45	34.53	106	00:26:20
00:26:43	33.53	48.28	29.46	34.53	107	00:26:21
00:26:44	33.53	48.35	29.46	34.53	106	00:26:22
00:26:45	33.54	48.55	29.47	34.54	105	00:26:23
00:26:46	33.55	48.75	29.47	34.55	104	00:26:24
00:26:47	33.54	48.84	29.48	34.54	102	00:26:25
00:26:48	33.54	48.68	29.48	34.54	101	00:26:26
00:26:49	33.55	48.35	29.47	34.55	102	00:26:27
00:26:50	33.55	48.02	29.47	34.55	106	00:26:28
00:26:51	33.55	47.89	29.48	34.55	108	00:26:29
00:26:52	33.56	47.89	29.49	34.56	108	00:26:30
00:26:53	33.57	47.89	29.48	34.57	107	00:26:31
00:26:54	33.58	47.82	29.48	34.58	104	00:26:32
00:26:55	33.58	47.69	29.48	34.58	98	00:26:33
00:26:56	33.58	47.59	29.48	34.58	93	00:26:34
00:26:57	33.59	47.63	29.48	34.59	92	00:26:35
00:26:58	33.59	47.66	29.49	34.59	97	00:26:36
00:26:59	33.58	47.89	29.49	34.58	100	00:26:37
00:27:00	33.58	47.89	29.48	34.58	100	00:26:38
00:27:01	33.59	47.69	29.48	34.59	98	00:26:39
00:27:02	33.59	47.49	29.47	34.59	96	00:26:40
00:27:03	33.59	47.09	29.47	34.59	95	00:26:41
00:27:04	33.6	46.83	29.47	34.6	97	00:26:42
00:27:05	33.6	46.63	29.46	34.6	99	00:26:43
00:27:06	33.6	46.36	29.44	34.6	102	00:26:44
00:27:07	33.6	46.23	29.45	34.6	105	00:26:45
00:27:08	33.6	46.36	29.45	34.6	107	00:26:46
00:27:09	33.6	46.7	29.46	34.6	111	00:26:47
00:27:10	33.6	46.76	29.46	34.6	114	00:26:48
00:27:11	33.59	46.7	29.47	34.59	117	00:26:49
00:27:12	33.59	46.5	29.46	34.59	118	00:26:50
00:27:13	33.59	46.2	29.46	34.59	119	00:26:51
00:27:14	33.58	45.9	29.46	34.58	119	00:26:52
00:27:15	33.58	45.56	29.47	34.58	119	00:26:53
00:27:16	33.59	45.09	29.46	34.59	116	00:26:54
00:27:17	33.59	44.96	29.47	34.59	114	00:26:55
00:27:18	33.59	44.96	29.47	34.59	114	00:26:56
00:27:19	33.6	45.23	29.47	34.6	115	00:26:57
00:27:20	33.6	45.57	29.48	34.6	117	00:26:58
00:27:21	33.6	46.13	29.46	34.6	119	00:26:59
00:27:22	33.6	45.97	29.48	34.6	121	00:27:00
00:27:23	33.6	45.66	29.46	34.6	120	00:27:01
00:27:24	33.59	45.56	29.46	34.59	116	00:27:02
00:27:25	33.58	45.5	29.46	34.58	114	00:27:03
00:27:26	33.58	45.43	29.46	34.58	110	00:27:04
00:27:27	33.57	45.33	29.46	34.57	104	00:27:05
00:27:28	33.55	45.3	29.46	34.55	102	00:27:06
00:27:29	33.54	45.3	29.47	34.54	102	00:27:07
00:27:30	33.53	45.23	29.48	34.53	104	00:27:08
00:27:31	33.52	45.13	29.48	34.52	107	00:27:09
00:27:32	33.51	45.03	29.46	34.51	111	00:27:10
00:27:33	33.51	45.46	29.47	34.51	114	00:27:11
00:27:34	33.52	46.03	29.47	34.52	116	00:27:12
00:27:35	33.52	46.6	29.48	34.52	118	00:27:13
00:27:36	33.52	46.9	29.48	34.52	121	00:27:14
00:27:37	33.52	46.9	29.5	34.52	121	00:27:15
00:27:38	33.51	46.77	29.5	34.51	117	00:27:16
00:27:39	33.5	46.97	29.49	34.5	113	00:27:17
00:27:40	33.5	47.23	29.5	34.5	110	00:27:18
00:27:41	33.5	47.26	29.5	34.5	106	00:27:19
00:27:42	33.51	47.2	29.5	34.51	106	00:27:20
00:27:43	33.52	47.3	29.5	34.52	109	00:27:21
00:27:44	33.53	47.56	29.49	34.53	114	00:27:22
00:27:45	33.54	47.63	29.5	34.54	118	00:27:23
00:27:46	33.55	47.69	29.49	34.55	120	00:27:24
00:27:47	33.54	48.12	29.5	34.54	118	00:27:25
00:27:48	33.54	48.42	29.49	34.54	114	00:27:26
00:27:49	33.54	48.45	29.51	34.54	109	00:27:27
00:27:50	33.53	48.52	29.51	34.53	104	00:27:28
00:27:51	33.53	48.68	29.5	34.53	98	00:27:29
00:27:52	33.53	48.72	29.52	34.53	100	00:27:30
00:27:53	33.54	48.68	29.52	34.54	104	00:27:31
00:27:54	33.54	48.82	29.52	34.54	108	00:27:32
00:27:55	33.55	49.21	29.51	34.55	111	00:27:33
00:27:56	33.56	49.87	29.53	34.56	111	00:27:34
00:27:57	33.59	50.19	29.52	34.59	107	00:27:35
00:27:58	33.62	50.26	29.53	34.62	103	00:27:36
00:27:59	33.66	50.22	29.53	34.66	99	00:27:37
00:28:00	33.69	50.09	29.52	34.69	98	00:27:38
00:28:01	33.72	50	29.53	34.72	102	00:27:39
00:28:02	33.75	50.19	29.53	34.75	106	00:27:40
00:28:03	33.78	50.65	29.54	34.78	105	00:27:41
00:28:04	33.8	50.85	29.55	34.8	102	00:27:42
00:28:05	33.82	50.78	29.54	34.82	99	00:27:43
00:28:06	33.84	50.59	29.53	34.84	95	00:27:44
00:28:07	33.85	50.52	29.55	34.85	95	00:27:45
00:28:08	33.86	50.75	29.56	34.86	96	00:27:46
00:28:09	33.88	51.04	29.56	34.88	97	00:27:47
00:28:10	33.88	51.33	29.56	34.88	98	00:27:48
00:28:11	33.89	51.37	29.56	34.89	99	00:27:49
00:28:12	33.9	51.04	29.56	34.9	102	00:27:50
00:28:13	33.91	50.88	29.56	34.91	104	00:27:51
00:28:14	33.91	50.85	29.56	34.91	106	00:27:52
00:28:15	33.91	50.91	29.57	34.91	107	00:27:53
00:28:16	33.92	50.72	29.58	34.92	108	00:27:54
00:28:17	33.92	50.62	29.58	34.92	109	00:27:55
00:28:18	33.93	50.62	29.57	34.93	111	00:27:56
00:28:19	33.94	50.98	29.58	34.94	112	00:27:57
00:28:20	33.94	51.05	29.57	34.94	111	00:27:58
00:28:21	33.95	50.85	29.58	34.95	111	00:27:59
00:28:22	33.96	50.69	29.58	34.96	110	00:28:00
00:28:23	33.97	50.59	29.58	34.97	106	00:28:01
00:28:24	33.98	50.49	29.58	34.98	105	00:28:02
00:28:25	33.99	50.59	29.57	34.99	106	00:28:03
00:28:26	33.99	50.72	29.58	34.99	105	00:28:04
00:28:27	34	50.36	29.58	35	106	00:28:05
00:28:28	34	50.2	29.58	35	105	00:28:06
00:28:29	34.01	50.2	29.57	35.01	99	00:28:07
00:28:30	34.02	49.74	29.56	35.02	95	00:28:08
00:28:31	34.02	49.35	29.56	35.02	95	00:28:09
00:28:32	34.02	49.02	29.57	35.02	95	00:28:10
00:28:33	34.03	48.72	29.56	35.03	94	00:28:11
00:28:34	34.03	48.62	29.56	35.03	93	00:28:12
00:28:35	34.02	48.46	29.56	35.02	92	00:28:13
00:28:36	34.02	48.43	29.56	35.02	95	00:28:14
00:28:37	34.04	48.43	29.56	35.04	96	00:28:15
00:28:38	34.03	48.46	29.56	35.03	98	00:28:16
00:28:39	34.04	48.95	29.57	35.04	103	00:28:17
00:28:40	34.05	48.95	29.57	35.05	102	00:28:18
00:28:41	34.06	48.63	29.56	35.06	99	00:28:19
00:28:42	34.06	48.43	29.58	35.06	97	00:28:20
00:28:43	34.08	48.36	29.57	35.08	97	00:28:21
00:28:44	34.07	47.87	29.57	35.07	98	00:28:22
00:28:45	34.08	47.7	29.57	35.08	97	00:28:23
00:28:46	34.09	47.67	29.58	35.09	95	00:28:24
00:28:47	34.1	47.77	29.57	35.1	91	00:28:25
00:28:48	34.1	47.84	29.58	35.1	90	00:28:26
00:28:49	34.11	47.81	29.59	35.11	91	00:28:27
00:28:50	34.11	47.74	29.6	35.11	94	00:28:28
00:28:51	34.1	47.64	29.6	35.1	96	00:28:29
00:28:52	34.09	47.51	29.6	35.09	97	00:28:30
00:28:53	34.09	47.54	29.61	35.09	92	00:28:31
00:28:54	34.1	48.27	29.61	35.1	92	00:28:32
00:28:55	34.1	48.89	29.62	35.1	97	00:28:33
00:28:56	34.11	49.16	29.6	35.11	102	00:28:34
00:28:57	34.12	49.52	29.61	35.12	102	00:28:35
00:28:58	34.13	49.75	29.61	35.13	100	00:28:36
00:28:59	34.13	49.94	29.62	35.13	98	00:28:37
00:29:00	34.13	49.98	29.61	35.13	100	00:28:38
00:29:01	34.14	49.85	29.62	35.14	101	00:28:39
00:29:02	34.14	49.81	29.61	35.14	101	00:28:40
00:29:03	34.15	49.94	29.62	35.15	102	00:28:41
00:29:04	34.16	49.98	29.63	35.16	103	00:28:42
00:29:05	34.16	49.88	29.63	35.16	104	00:28:43
00:29:06	34.16	49.81	29.63	35.16	104	00:28:44
00:29:07	34.17	50.01	29.64	35.17	101	00:28:45
00:29:08	34.17	50.08	29.64	35.17	97	00:28:46
00:29:09	34.17	50.11	29.64	35.17	95	00:28:47
00:29:10	34.17	50.34	29.64	35.17	95	00:28:48
00:29:11	34.17	50.53	29.64	35.17	99	00:28:49
00:29:12	34.17	50.57	29.64	35.17	101	00:28:50
00:29:13	34.17	50.57	29.65	35.17	103	00:28:51
00:29:14	34.17	50.4	29.64	35.17	100	00:28:52
00:29:15	34.18	50.24	29.64	35.18	96	00:28:53
00:29:16	34.18	50.04	29.65	35.18	92	00:28:54
00:29:17	34.18	49.82	29.65	35.18	92	00:28:55
00:29:18	34.19	49.72	29.65	35.19	94	00:28:56
00:29:19	34.19	49.62	29.65	35.19	95	00:28:57
00:29:20	34.2	49.52	29.66	35.2	96	00:28:58
00:29:21	34.21	49.55	29.65	35.21	96	00:28:59
00:29:22	34.21	49.59	29.65	35.21	95	00:29:00
00:29:23	34.19	49.56	29.66	35.19	96	00:29:01
00:29:24	34.2	49.55	29.66	35.2	97	00:29:02
00:29:25	34.18	49.75	29.66	35.18	98	00:29:03
00:29:26	34.17	49.92	29.66	35.17	100	00:29:04
00:29:27	34.16	49.95	29.67	35.16	101	00:29:05
00:29:28	34.15	49.92	29.67	35.15	104	00:29:06
00:29:29	34.15	49.89	29.67	35.15	105	00:29:07
00:29:30	34.15	49.95	29.68	35.15	104	00:29:08
00:29:31	34.15	49.98	29.68	35.15	100	00:29:09
00:29:32	34.17	50.05	29.69	35.17	97	00:29:10
00:29:33	34.18	50.28	29.67	35.18	94	00:29:11
00:29:34	34.18	50.9	29.68	35.18	93	00:29:12
00:29:35	34.2	51.45	29.69	35.2	94	00:29:13
00:29:36	34.19	52.13	29.69	35.19	95	00:29:14
00:29:37	34.19	52.74	29.72	35.19	97	00:29:15
00:29:38	34.2	53	29.69	35.2	99	00:29:16
00:29:39	34.21	52.71	29.7	35.21	101	00:29:17
00:29:40	34.21	52.94	29.71	35.21	102	00:29:18
00:29:41	34.22	53.16	29.71	35.22	102	00:29:19
00:29:42	34.22	53.22	29.7	35.22	98	00:29:20
00:29:43	34.22	53.32	29.71	35.22	93	00:29:21
00:29:44	34.23	53.23	29.72	35.23	91	00:29:22
00:29:45	34.23	52.91	29.7	35.23	93	00:29:23
00:29:46	34.23	52.58	29.71	35.23	94	00:29:24
00:29:47	34.23	52.39	29.71	35.23	93	00:29:25
00:29:48	34.24	52.23	29.73	35.24	92	00:29:26
00:29:49	34.24	52	29.72	35.24	92	00:29:27
00:29:50	34.24	51.91	29.74	35.24	94	00:29:28
00:29:51	34.25	51.97	29.74	35.25	96	00:29:29
00:29:52	34.25	52.3	29.74	35.25	97	00:29:30
00:29:53	34.25	52.71	29.74	35.25	96	00:29:31
00:29:54	34.25	52.94	29.74	35.25	95	00:29:32
00:29:55	34.26	52.81	29.74	35.26	93	00:29:33
00:29:56	34.27	52.49	29.75	35.27	97	00:29:34
00:29:57	34.27	52.59	29.75	35.27	98	00:29:35
00:29:58	34.27	52.88	29.77	35.27	96	00:29:36
00:29:59	34.27	52.52	29.76	35.27	94	00:29:37
00:30:00	34.27	51.97	29.75	35.27	93	00:29:38
00:30:01	34.27	51.42	29.75	35.27	93	00:29:39
00:30:02	34.28	51.1	29.76	35.28	96	00:29:40
00:30:03	34.29	50.9	29.75	35.29	99	00:29:41
00:30:04	34.28	50.38	29.74	35.28	101	00:29:42
00:30:05	34.29	50.38	29.75	35.29	102	00:29:43
00:30:06	34.28	50.61	29.76	35.28	103	00:29:44
00:30:07	34.28	50.81	29.75	35.28	103	00:29:45
00:30:08	34.27	50.88	29.77	35.27	103	00:29:46
00:30:09	34.27	50.88	29.76	35.27	105	00:29:47
00:30:10	34.27	51.01	29.77	35.27	107	00:29:48
00:30:11	34.27	51.26	29.78	35.27	107	00:29:49
00:30:12	34.27	50.74	29.76	35.27	105	00:29:50
00:30:13	34.27	50.25	29.76	35.27	101	00:29:51
00:30:14	34.28	49.89	29.75	35.28	99	00:29:52
00:30:15	34.29	49.7	29.75	35.29	98	00:29:53
00:30:16	34.3	50.32	29.76	35.3	97	00:29:54
00:30:17	34.3	51.49	29.76	35.3	96	00:29:55
00:30:18	34.31	52.46	29.77	35.31	97	00:29:56
00:30:19	34.31	52.98	29.77	35.31	98	00:29:57
00:30:20	34.31	53.2	29.78	35.31	98	00:29:58
00:30:21	34.31	53.2	29.8	35.31	100	00:29:59
00:30:22	34.32	53.14	29.8	35.32	101	00:30:00
00:30:23	34.32	53.11	29.8	35.32	100	00:30:01
00:30:24	34.32	53.24	29.8	35.32	97	00:30:02
00:30:25	34.32	53.49	29.8	35.32	96	00:30:03
00:30:26	34.32	53.56	29.8	35.32	98	00:30:04
00:30:27	34.31	53.56	29.8	35.31	101	00:30:05
00:30:28	34.33	53.63	29.82	35.33	102	00:30:06
00:30:29	34.34	54.3	29.82	35.34	103	00:30:07
00:30:30	34.34	54.49	29.82	35.34	98	00:30:08
00:30:31	34.36	54.23	29.82	35.36	94	00:30:09
00:30:32	34.37	53.66	29.82	35.37	91	00:30:10
00:30:34	34.35	52.11	29.76	35.35	90	00:30:11
00:30:35	34.37	51.53	29.79	35.37	89	00:30:12
00:30:36	34.37	50.75	29.79	35.37	89	00:30:13
00:30:37	34.38	50.55	29.78	35.38	94	00:30:14
00:30:38	34.4	50.35	29.79	35.4	98	00:30:15
00:30:39	34.42	50.22	29.77	35.42	101	00:30:16
00:30:40	34.42	50.16	29.78	35.42	103	00:30:17
00:30:41	34.43	50.22	29.77	35.43	103	00:30:18
00:30:42	34.45	51.01	29.78	35.45	103	00:30:19
00:30:43	34.45	51.69	29.78	35.45	101	00:30:20
00:30:44	34.44	52.01	29.79	35.44	101	00:30:21
00:30:45	34.43	52.11	29.81	35.43	100	00:30:22
00:30:46	34.42	52.37	29.81	35.42	102	00:30:23
00:30:47	34.41	52.66	29.81	35.41	103	00:30:24
00:30:48	34.41	52.72	29.82	35.41	105	00:30:25
00:30:49	34.42	52.53	29.81	35.42	106	00:30:26
00:30:50	34.43	52.3	29.81	35.43	107	00:30:27
00:30:51	34.44	52.18	29.82	35.44	107	00:30:28
00:30:52	34.44	52.18	29.82	35.44	105	00:30:29
00:30:53	34.45	52.57	29.83	35.45	102	00:30:30
00:30:54	34.45	52.4	29.83	35.45	97	00:30:31
00:30:55	34.45	51.56	29.81	35.45	95	00:30:32
00:30:56	34.45	50.49	29.8	35.45	97	00:30:33
00:30:57	34.45	49.93	29.8	35.45	95	00:30:34
00:30:58	34.44	49.8	29.81	35.44	94	00:30:35
00:30:59	34.43	49.57	29.81	35.43	94	00:30:36
00:31:00	34.43	49.38	29.82	35.43	95	00:30:37
00:31:01	34.44	49.45	29.82	35.44	97	00:30:38
00:31:02	34.43	49.67	29.82	35.43	99	00:30:39
00:31:03	34.43	49.64	29.82	35.43	100	00:30:40
00:31:04	34.44	49.51	29.83	35.44	101	00:30:41
00:31:05	34.43	49.25	29.83	35.43	102	00:30:42
00:31:06	34.42	48.85	29.82	35.42	102	00:30:43
00:31:07	34.42	48.56	29.83	35.42	100	00:30:44
00:31:08	34.41	48.4	29.83	35.41	98	00:30:45
00:31:09	34.41	48.43	29.84	35.41	97	00:30:46
00:31:10	34.43	48.46	29.84	35.43	98	00:30:47
00:31:11	34.44	48.46	29.84	35.44	100	00:30:48
00:31:12	34.45	48.36	29.84	35.45	101	00:30:49
00:31:13	34.46	48.2	29.85	35.46	101	00:30:50
00:31:14	34.47	48.17	29.84	35.47	104	00:30:51
00:31:15	34.47	48.2	29.85	35.47	106	00:30:52
00:31:16	34.48	48.33	29.85	35.48	109	00:30:53
00:31:17	34.49	48.53	29.85	35.49	110	00:30:54
00:31:18	34.5	48.36	29.84	35.5	109	00:30:55
00:31:19	34.5	47.9	29.83	35.5	105	00:30:56
00:31:20	34.48	47.57	29.82	35.48	102	00:30:57
00:31:22	34.46	47.5	29.78	35.46	99	00:30:58
00:31:23	34.44	47.5	29.81	35.44	98	00:30:59
00:31:24	34.43	48.13	29.83	35.43	98	00:31:00
00:31:25	34.43	48.46	29.83	35.43	100	00:31:01
00:31:26	34.42	48.46	29.83	35.42	103	00:31:02
00:31:27	34.41	48.95	29.83	35.41	104	00:31:03
00:31:28	34.4	49.09	29.82	35.4	105	00:31:04
00:31:29	34.38	49.02	29.83	35.38	105	00:31:05
00:31:30	34.36	48.82	29.84	35.36	105	00:31:06
00:31:31	34.35	48.33	29.84	35.35	104	00:31:07
00:31:32	34.33	48.2	29.84	35.33	103	00:31:08
00:31:33	34.32	48.26	29.84	35.32	101	00:31:09
00:31:34	34.32	48.07	29.84	35.32	102	00:31:10
00:31:35	34.31	47.87	29.83	35.31	100	00:31:11
00:31:36	34.31	47.64	29.82	35.31	101	00:31:12
00:31:37	34.3	47.83	29.82	35.3	100	00:31:13
00:31:38	34.3	48.2	29.85	35.3	100	00:31:14
00:31:39	34.28	48.46	29.84	35.28	102	00:31:15
00:31:40	34.28	48.66	29.84	35.28	104	00:31:16
00:31:41	34.27	48.66	29.85	35.27	105	00:31:17
00:31:42	34.26	48.5	29.85	35.26	106	00:31:18
00:31:43	34.25	48.33	29.86	35.25	107	00:31:19
00:31:44	34.24	48.33	29.85	35.24	109	00:31:20
00:31:45	34.24	48.53	29.86	35.24	110	00:31:21
00:31:46	34.23	48.3	29.85	35.23	107	00:31:22
00:31:47	34.23	48.1	29.85	35.23	101	00:31:23
00:31:48	34.24	48.1	29.84	35.24	99	00:31:24
00:31:49	34.25	48.2	29.84	35.25	100	00:31:25
00:31:50	34.25	47.83	29.83	35.25	101	00:31:26
00:31:51	34.25	48.4	29.84	35.25	101	00:31:27
00:31:52	34.25	49.68	29.83	35.25	100	00:31:28
00:31:53	34.23	50.27	29.87	35.23	98	00:31:29
00:31:54	34.21	50.43	29.87	35.21	96	00:31:30
00:31:55	34.21	50.27	29.87	35.21	96	00:31:31
00:31:56	34.2	49.97	29.86	35.2	97	00:31:32
00:31:57	34.19	49.91	29.88	35.19	98	00:31:33
00:31:58	34.2	49.65	29.87	35.2	100	00:31:34
00:31:59	34.2	49.29	29.85	35.2	101	00:31:35
00:32:00	34.19	49.32	29.87	35.19	103	00:31:36
00:32:01	34.19	49.16	29.87	35.19	105	00:31:37
00:32:02	34.19	48.99	29.86	35.19	107	00:31:38
00:32:03	34.18	48.99	29.87	35.18	103	00:31:39
00:32:04	34.18	48.99	29.88	35.18	99	00:31:40
00:32:05	34.17	48.93	29.87	35.17	93	00:31:41
00:32:06	34.16	48.5	29.88	35.16	91	00:31:42
00:32:07	34.16	48.2	29.87	35.16	92	00:31:43
00:32:08	34.15	47.8	29.86	35.15	93	00:31:44
00:32:09	34.14	47.24	29.86	35.14	96	00:31:45
00:32:10	34.14	46.57	29.85	35.14	100	00:31:46
00:32:11	34.13	45.71	29.84	35.13	101	00:31:47
00:32:12	34.12	45.04	29.82	35.12	103	00:31:48
00:32:13	34.13	44.67	29.82	35.13	105	00:31:49
00:32:14	34.12	44.84	29.82	35.12	107	00:31:50
00:32:15	34.11	45.54	29.83	35.11	108	00:31:51
00:32:16	34.12	46.11	29.82	35.12	108	00:31:52
00:32:17	34.11	46.94	29.82	35.11	109	00:31:53
00:32:18	34.1	47.47	29.83	35.1	110	00:31:54
00:32:19	34.09	47.17	29.81	35.09	112	00:31:55
00:32:20	34.07	46.77	29.82	35.07	115	00:31:56
00:32:21	34.05	46.47	29.82	35.05	117	00:31:57
00:32:22	34.02	45.74	29.81	35.02	117	00:31:58
00:32:23	33.99	45.4	29.81	34.99	117	00:31:59
00:32:24	33.97	45.67	29.81	34.97	117	00:32:00
00:32:25	33.96	45.37	29.81	34.96	116	00:32:01
00:32:26	33.95	44.97	29.8	34.95	115	00:32:02
00:32:27	33.95	44.87	29.8	34.95	115	00:32:03
00:32:28	33.95	44.67	29.8	34.95	115	00:32:04
00:32:29	33.95	44.87	29.8	34.95	115	00:32:05
00:32:30	33.95	45.24	29.81	34.95	115	00:32:06
00:32:31	33.95	45.3	29.8	34.95	114	00:32:07
00:32:32	33.95	45.07	29.8	34.95	114	00:32:08
00:32:33	33.95	44.94	29.8	34.95	113	00:32:09
00:32:34	33.94	44.8	29.8	34.94	112	00:32:10
00:32:35	33.93	44.64	29.8	34.93	111	00:32:11
00:32:36	33.92	44.53	29.81	34.92	110	00:32:12
00:32:37	33.92	44.47	29.82	34.92	110	00:32:13
00:32:38	33.92	44.4	29.81	34.92	111	00:32:14
00:32:39	33.92	44.83	29.81	34.92	113	00:32:15
00:32:40	33.92	45.37	29.82	34.92	113	00:32:16
00:32:41	33.92	45.64	29.82	34.92	113	00:32:17
00:32:42	33.9	45.74	29.82	34.9	110	00:32:18
00:32:43	33.9	45.87	29.82	34.9	107	00:32:19
00:32:44	33.9	46.47	29.82	34.9	107	00:32:20
00:32:45	33.9	47.24	29.82	34.9	109	00:32:21
00:32:46	33.89	47.67	29.83	34.89	111	00:32:22
00:32:47	33.9	48.13	29.83	34.9	113	00:32:23
00:32:48	33.9	49.12	29.84	34.9	113	00:32:24
00:32:49	33.9	49.61	29.84	34.9	111	00:32:25
00:32:50	33.9	49.25	29.82	34.9	108	00:32:26
00:32:51	33.9	48.89	29.8	34.9	105	00:32:27
00:32:52	33.89	48.72	29.8	34.89	103	00:32:28
00:32:53	33.88	48.59	29.8	34.88	101	00:32:29
00:32:54	33.88	48.79	29.81	34.88	102	00:32:30
00:32:55	33.87	48.85	29.81	34.87	103	00:32:31
00:32:56	33.86	48.82	29.82	34.86	104	00:32:32
00:32:57	33.85	48.66	29.82	34.85	104	00:32:33
00:32:58	33.85	48.46	29.82	34.85	103	00:32:34
00:32:59	33.85	48.26	29.83	34.85	100	00:32:35
00:33:00	33.84	48.07	29.82	34.84	96	00:32:36
00:33:01	33.84	47.93	29.83	34.84	93	00:32:37
00:33:02	33.84	47.8	29.83	34.84	89	00:32:38
00:33:03	33.83	47.74	29.83	34.83	82	00:32:39
00:33:04	33.83	47.63	29.83	34.83	81	00:32:40
00:33:05	33.83	47.54	29.83	34.83	81	00:32:41
00:33:06	33.83	47.47	29.83	34.83	85	00:32:42
00:33:07	33.83	47.4	29.84	34.83	90	00:32:43
00:33:08	33.83	47.37	29.84	34.83	95	00:32:44
00:33:09	33.82	47.37	29.83	34.82	98	00:32:45
00:33:10	33.82	47.34	29.83	34.82	96	00:32:46
00:33:11	33.82	47.37	29.83	34.82	92	00:32:47
00:33:12	33.82	47.41	29.84	34.82	87	00:32:48
00:33:13	33.82	47.41	29.84	34.82	85	00:32:49
00:33:14	33.83	47.47	29.84	34.83	87	00:32:50
00:33:15	33.83	47.77	29.85	34.83	90	00:32:51
00:33:16	33.83	48.27	29.86	34.83	94	00:32:52
00:33:17	33.82	48.66	29.86	34.82	97	00:32:53
00:33:18	33.82	48.76	29.85	34.82	97	00:32:54
00:33:19	33.8	48.92	29.86	34.8	95	00:32:55
00:33:20	33.81	49.02	29.86	34.81	92	00:32:56
00:33:21	33.8	49.02	29.85	34.8	86	00:32:57
00:33:22	33.81	48.89	29.86	34.81	84	00:32:58
00:33:23	33.81	48.73	29.86	34.81	84	00:32:59
00:33:24	33.82	48.5	29.86	34.82	86	00:33:00
00:33:25	33.81	48.43	29.85	34.81	88	00:33:01
00:33:26	33.82	48.4	29.86	34.82	89	00:33:02
00:33:27	33.82	48.07	29.85	34.82	92	00:33:03
00:33:28	33.82	47.61	29.86	34.82	91	00:33:04
00:33:29	33.82	47.31	29.85	34.82	92	00:33:05
00:33:30	33.82	47.07	29.84	34.82	91	00:33:06
00:33:31	33.82	46.94	29.86	34.82	91	00:33:07
00:33:32	33.82	46.94	29.85	34.82	91	00:33:08
00:33:33	33.82	47.34	29.86	34.82	92	00:33:09
00:33:34	33.82	47.61	29.87	34.82	94	00:33:10
00:33:35	33.82	47.67	29.85	34.82	94	00:33:11
00:33:36	33.82	47.61	29.86	34.82	94	00:33:12
00:33:37	33.81	47.47	29.86	34.81	94	00:33:13
00:33:38	33.8	47.41	29.86	34.8	92	00:33:14
00:33:39	33.8	47.27	29.86	34.8	93	00:33:15
00:33:40	33.79	46.88	29.86	34.79	92	00:33:16
00:33:41	33.79	46.48	29.84	34.79	94	00:33:17
00:33:42	33.8	46.01	29.84	34.8	95	00:33:18
[truncated: 2,824 more rows]

## Sheet: 3
Time (h:m:s)	Tc (C)	RH (%)	Ta (C)	Tc (C)	HR (bpm)	Time HR	Correction factor	0.7
00:00:07	35.98	54.29	25.2	36.68	82	00:00:00
00:00:08	35.98	53.76	25.23	36.68	83	00:00:01
00:00:09	35.98	53.26	25.25	36.68	84	00:00:02
00:00:10	35.99	53.07	25.26	36.69	84	00:00:03
00:00:12	36	52.11	25.28	36.7	84	00:00:04
00:00:13	35.99	50.74	25.28	36.69	84	00:00:05
00:00:14	35.99	49.33	25.26	36.69	84	00:00:06
00:00:15	35.99	48.16	25.26	36.69	84	00:00:07
00:00:16	35.99	47.31	25.27	36.69	83	00:00:08
00:00:17	35.99	46.65	25.28	36.69	82	00:00:09
00:00:18	35.99	46.29	25.27	36.69	82	00:00:10
00:00:19	35.99	45.93	25.29	36.69	81	00:00:11
00:00:20	35.99	45.61	25.28	36.69	81	00:00:12
00:00:21	35.99	45.28	25.28	36.69	82	00:00:13
00:00:22	35.99	45.01	25.29	36.69	82	00:00:14
00:00:23	35.99	44.98	25.3	36.69	82	00:00:15
00:00:24	35.99	45.08	25.3	36.69	81	00:00:16
00:00:25	35.99	45.28	25.32	36.69	81	00:00:17
00:00:27	35.99	45.28	25.31	36.69	81	00:00:18
00:00:28	35.99	45.11	25.3	36.69	81	00:00:19
00:00:29	36	44.88	25.31	36.7	82	00:00:20
00:00:30	36.01	44.62	25.3	36.71	83	00:00:21
00:00:31	36.01	44.39	25.33	36.71	83	00:00:22
00:00:32	36.01	44.22	25.33	36.71	84	00:00:23
00:00:33	36.01	44.12	25.32	36.71	84	00:00:24
00:00:34	36	44.09	25.33	36.7	84	00:00:25
00:00:35	35.99	44.12	25.33	36.69	85	00:00:26
00:00:36	35.99	44.19	25.34	36.69	86	00:00:27
00:00:37	35.99	44.22	25.34	36.69	86	00:00:28
00:00:38	35.98	44.16	25.34	36.68	85	00:00:29
00:00:39	35.98	43.99	25.34	36.68	85	00:00:30
00:00:40	35.98	43.89	25.36	36.68	85	00:00:31
00:00:41	35.98	43.96	25.36	36.68	85	00:00:32
00:00:43	35.99	44.03	25.36	36.69	86	00:00:33
00:00:44	35.99	43.96	25.36	36.69	87	00:00:34
00:00:45	36	43.89	25.36	36.7	91	00:00:35
00:00:46	36	43.96	25.36	36.7	90	00:00:36
00:00:47	36	44.09	25.37	36.7	90	00:00:37
00:00:48	36	44.26	25.37	36.7	90	00:00:38
00:00:49	36.01	44.43	25.37	36.71	95	00:00:39
00:00:50	36	44.49	25.38	36.7	94	00:00:40
00:00:51	36	44.53	25.39	36.7	94	00:00:41
00:00:52	36	44.49	25.39	36.7	92	00:00:42
00:00:53	35.99	44.33	25.39	36.69	90	00:00:43
00:00:54	35.99	44.23	25.4	36.69	89	00:00:44
00:00:55	35.99	44.16	25.39	36.69	88	00:00:45
00:00:56	35.99	44.13	25.41	36.69	87	00:00:46
00:00:57	35.99	44.2	25.41	36.69	87	00:00:47
00:00:59	35.99	44.3	25.41	36.69	85	00:00:48
00:01:00	35.99	44.36	25.41	36.69	87	00:00:49
00:01:01	35.99	44.43	25.42	36.69	88	00:00:50
00:01:02	35.99	44.6	25.42	36.69	87	00:00:51
00:01:03	35.99	44.53	25.42	36.69	88	00:00:52
00:01:04	35.99	44.36	25.42	36.69	88	00:00:53
00:01:05	36	44.23	25.42	36.7	91	00:00:54
00:01:06	36	44.07	25.42	36.7	91	00:00:55
00:01:07	36	43.97	25.43	36.7	92	00:00:56
00:01:08	36	43.93	25.42	36.7	92	00:00:57
00:01:09	35.99	43.9	25.43	36.69	93	00:00:58
00:01:10	35.98	43.83	25.43	36.68	94	00:00:59
00:01:11	35.99	43.77	25.44	36.69	95	00:01:00
00:01:12	35.99	43.8	25.44	36.69	97	00:01:01
00:01:14	35.99	43.9	25.44	36.69	98	00:01:02
00:01:15	35.99	43.97	25.44	36.69	98	00:01:03
00:01:16	36	44.04	25.44	36.7	98	00:01:04
00:01:17	35.98	44.04	25.45	36.68	99	00:01:05
00:01:18	35.98	44.04	25.46	36.68	100	00:01:06
00:01:19	35.98	44	25.46	36.68	100	00:01:07
00:01:20	35.97	43.97	25.47	36.67	99	00:01:08
00:01:21	35.96	43.97	25.47	36.66	98	00:01:09
00:01:22	35.96	43.91	25.47	36.66	93	00:01:10
00:01:23	35.95	43.84	25.47	36.65	90	00:01:11
00:01:24	35.95	43.84	25.48	36.65	91	00:01:12
00:01:25	35.95	43.91	25.47	36.65	93	00:01:13
00:01:26	35.95	43.97	25.48	36.65	93	00:01:14
00:01:27	35.95	43.97	25.48	36.65	93	00:01:15
00:01:28	35.95	43.94	25.49	36.65	94	00:01:16
00:01:30	35.95	43.87	25.48	36.65	94	00:01:17
00:01:31	35.95	43.84	25.49	36.65	94	00:01:18
00:01:32	35.95	43.77	25.5	36.65	95	00:01:19
00:01:33	35.95	43.71	25.5	36.65	94	00:01:20
00:01:34	35.95	43.68	25.5	36.65	95	00:01:21
00:01:35	35.95	43.64	25.51	36.65	95	00:01:22
00:01:36	35.95	43.61	25.51	36.65	96	00:01:23
00:01:37	35.95	43.54	25.51	36.65	96	00:01:24
00:01:38	35.95	43.51	25.5	36.65	100	00:01:25
00:01:39	35.95	43.51	25.5	36.65	102	00:01:26
00:01:40	35.93	43.45	25.53	36.63	103	00:01:27
00:01:41	35.93	43.41	25.54	36.63	103	00:01:28
00:01:42	35.92	43.41	25.54	36.62	102	00:01:29
00:01:43	35.91	43.38	25.54	36.61	100	00:01:30
00:01:45	35.92	43.31	25.53	36.62	99	00:01:31
00:01:46	35.94	43.35	25.54	36.64	99	00:01:32
00:01:47	35.93	43.41	25.54	36.63	98	00:01:33
00:01:48	35.93	43.48	25.54	36.63	95	00:01:34
00:01:49	35.94	43.48	25.54	36.64	94	00:01:35
00:01:50	35.93	43.65	25.56	36.63	94	00:01:36
00:01:51	35.91	44.11	25.56	36.61	96	00:01:37
00:01:52	35.91	44.25	25.56	36.61	98	00:01:38
00:01:53	35.91	44.41	25.57	36.61	101	00:01:39
00:01:54	35.91	44.81	25.58	36.61	102	00:01:40
00:01:55	35.91	45.71	25.58	36.61	103	00:01:41
00:01:56	35.91	46.76	25.58	36.61	103	00:01:42
00:01:57	35.91	47.38	25.58	36.61	104	00:01:43
00:01:58	35.91	48	25.58	36.61	105	00:01:44
00:01:59	35.9	48.13	25.59	36.6	105	00:01:45
00:02:01	35.9	49.04	25.6	36.6	105	00:01:46
00:02:02	35.9	49.79	25.61	36.6	105	00:01:47
00:02:03	35.89	49.88	25.6	36.59	105	00:01:48
00:02:04	35.88	49.72	25.6	36.58	105	00:01:49
00:02:05	35.88	49.37	25.6	36.58	105	00:01:50
00:02:06	35.87	48.85	25.6	36.57	105	00:01:51
00:02:07	35.87	48.33	25.6	36.57	105	00:01:52
00:02:08	35.87	49.14	25.61	36.57	105	00:01:53
00:02:09	35.87	50.08	25.61	36.57	106	00:01:54
00:02:10	35.87	50.3	25.62	36.57	108	00:01:55
00:02:11	35.86	49.98	25.63	36.56	110	00:01:56
00:02:12	35.86	49.5	25.63	36.56	111	00:01:57
00:02:13	35.86	48.79	25.62	36.56	111	00:01:58
00:02:14	35.86	48.3	25.64	36.56	111	00:01:59
00:02:16	35.87	48.07	25.64	36.57	105	00:02:00
00:02:17	35.87	47.94	25.65	36.57	98	00:02:01
00:02:18	35.87	47.88	25.64	36.57	94	00:02:02
00:02:19	35.87	48.04	25.64	36.57	92	00:02:03
00:02:20	35.87	47.75	25.65	36.57	92	00:02:04
00:02:21	35.87	47.29	25.64	36.57	93	00:02:05
00:02:22	35.87	46.73	25.65	36.57	95	00:02:06
00:02:23	35.87	46.77	25.65	36.57	97	00:02:07
00:02:24	35.87	47.1	25.66	36.57	108	00:02:08
00:02:25	35.86	47.42	25.66	36.56	114	00:02:09
00:02:26	35.86	47.82	25.66	36.56	118	00:02:10
00:02:27	35.86	47.95	25.66	36.56	120	00:02:11
00:02:28	35.86	47.91	25.68	36.56	121	00:02:12
00:02:29	35.86	47.88	25.68	36.56	121	00:02:13
00:02:30	35.86	48.01	25.67	36.56	122	00:02:14
00:02:32	35.86	48.21	25.67	36.56	123	00:02:15
00:02:33	35.86	48.7	25.66	36.56	123	00:02:16
00:02:34	35.86	49.51	25.68	36.56	123	00:02:17
00:02:35	35.86	50.8	25.68	36.56	122	00:02:18
00:02:36	35.85	51.28	25.69	36.55	116	00:02:19
00:02:37	35.85	51.66	25.69	36.55	114	00:02:20
00:02:38	35.84	52.49	25.68	36.54	114	00:02:21
00:02:39	35.84	54.45	25.7	36.54	114	00:02:22
00:02:40	35.84	56.89	25.7	36.54	113	00:02:23
00:02:41	35.84	58.47	25.71	36.54	107	00:02:24
00:02:42	35.84	58.84	25.71	36.54	103	00:02:25
00:02:43	35.83	59.29	25.71	36.53	101	00:02:26
00:02:44	35.82	59.14	25.7	36.52	102	00:02:27
00:02:45	35.82	58.84	25.71	36.52	103	00:02:28
00:02:47	35.82	59.05	25.72	36.52	104	00:02:29
00:02:48	35.82	58.8	25.71	36.52	105	00:02:30
00:02:49	35.81	57.85	25.71	36.51	105	00:02:31
00:02:50	35.81	56.7	25.72	36.51	105	00:02:32
00:02:51	35.8	56.21	25.7	36.5	104	00:02:33
00:02:52	35.8	56.71	25.72	36.5	102	00:02:34
00:02:53	35.79	57.57	25.72	36.49	102	00:02:35
00:02:54	35.8	58.84	25.73	36.5	103	00:02:36
00:02:55	35.79	60.58	25.74	36.49	103	00:02:37
00:02:56	35.8	61.82	25.74	36.5	104	00:02:38
00:02:57	35.8	62.12	25.74	36.5	105	00:02:39
00:02:58	35.79	61.64	25.74	36.49	106	00:02:40
00:02:59	35.79	60.79	25.74	36.49	107	00:02:41
00:03:00	35.78	60.31	25.74	36.48	108	00:02:42
00:03:01	35.78	59.82	25.74	36.48	109	00:02:43
00:03:03	35.77	59.55	25.75	36.47	109	00:02:44
00:03:04	35.77	59.64	25.76	36.47	111	00:02:45
00:03:05	35.77	60.73	25.76	36.47	111	00:02:46
00:03:06	35.77	61.92	25.78	36.47	112	00:02:47
00:03:07	35.77	63.27	25.78	36.47	113	00:02:48
00:03:08	35.77	63.56	25.78	36.47	114	00:02:49
00:03:09	35.77	63.98	25.78	36.47	116	00:02:50
00:03:10	35.77	64.31	25.79	36.47	117	00:02:51
00:03:11	35.77	64.28	25.8	36.47	118	00:02:52
00:03:12	35.76	64.7	25.8	36.46	119	00:02:53
00:03:13	35.76	64.85	25.81	36.46	120	00:02:54
00:03:14	35.76	64.49	25.8	36.46	120	00:02:55
00:03:15	35.75	64.05	25.8	36.45	121	00:02:56
00:03:16	35.75	64.4	25.81	36.45	122	00:02:57
00:03:18	35.76	64.4	25.81	36.46	122	00:02:58
00:03:19	35.76	64.79	25.82	36.46	123	00:02:59
00:03:20	35.76	64.23	25.82	36.46	124	00:03:00
00:03:21	35.76	63.84	25.82	36.46	125	00:03:01
00:03:22	35.75	62.7	25.81	36.45	126	00:03:02
00:03:23	35.74	60.8	25.81	36.44	126	00:03:03
00:03:24	35.73	58.94	25.8	36.43	127	00:03:04
00:03:25	35.73	57.77	25.8	36.43	129	00:03:05
00:03:26	35.74	56.97	25.81	36.44	130	00:03:06
00:03:27	35.74	56	25.8	36.44	130	00:03:07
00:03:28	35.74	54.94	25.8	36.44	124	00:03:08
00:03:29	35.74	54.28	25.8	36.44	121	00:03:09
00:03:30	35.73	54.06	25.79	36.43	119	00:03:10
00:03:31	35.73	53.93	25.8	36.43	119	00:03:11
00:03:32	35.71	54.97	25.8	36.41	120	00:03:12
00:03:34	35.7	55.69	25.81	36.4	119	00:03:13
00:03:35	35.7	56.75	25.8	36.4	120	00:03:14
00:03:36	35.68	57.34	25.8	36.38	120	00:03:15
00:03:37	35.67	57.4	25.8	36.37	120	00:03:16
00:03:38	35.68	57.03	25.81	36.38	120	00:03:17
00:03:39	35.68	56.66	25.8	36.38	121	00:03:18
00:03:40	35.67	56.94	25.82	36.37	122	00:03:19
00:03:41	35.68	57.28	25.82	36.38	124	00:03:20
00:03:42	35.67	57.87	25.82	36.37	125	00:03:21
00:03:43	35.65	57.87	25.81	36.35	125	00:03:22
00:03:44	35.65	57.56	25.82	36.35	125	00:03:23
00:03:45	35.64	57.19	25.82	36.34	124	00:03:24
00:03:46	35.64	56.07	25.81	36.34	124	00:03:25
00:03:47	35.64	54.78	25.81	36.34	126	00:03:26
00:03:49	35.65	54.37	25.8	36.35	128	00:03:27
00:03:50	35.64	54.06	25.8	36.34	129	00:03:28
00:03:51	35.64	53.23	25.79	36.34	129	00:03:29
00:03:52	35.64	52.25	25.79	36.34	130	00:03:30
00:03:53	35.64	51.35	25.78	36.34	132	00:03:31
00:03:54	35.63	50.58	25.78	36.33	132	00:03:32
00:03:55	35.64	49.91	25.77	36.34	132	00:03:33
00:03:56	35.65	49.55	25.77	36.35	132	00:03:34
00:03:57	35.65	49.16	25.77	36.35	132	00:03:35
00:03:58	35.66	48.8	25.76	36.36	133	00:03:36
00:03:59	35.68	48.61	25.75	36.38	133	00:03:37
00:04:00	35.68	48.57	25.76	36.38	132	00:03:38
00:04:01	35.68	49.35	25.74	36.38	133	00:03:39
00:04:02	35.68	50.35	25.76	36.38	133	00:03:40
00:04:03	35.67	51.19	25.75	36.37	135	00:03:41
00:04:05	35.66	51.76	25.76	36.36	136	00:03:42
00:04:06	35.66	51.32	25.76	36.36	136	00:03:43
00:04:07	35.65	51.38	25.75	36.35	135	00:03:44
00:04:08	35.64	51.8	25.76	36.34	122	00:03:45
00:04:09	35.63	51.48	25.75	36.33	113	00:03:46
00:04:10	35.62	51	25.75	36.32	108	00:03:47
00:04:11	35.62	50.68	25.75	36.32	106	00:03:48
00:04:12	35.63	50.29	25.74	36.33	106	00:03:49
00:04:13	35.63	49.84	25.75	36.33	105	00:03:50
00:04:14	35.63	49.68	25.74	36.33	105	00:03:51
00:04:15	35.62	49.45	25.75	36.32	105	00:03:52
00:04:16	35.6	49.52	25.74	36.3	104	00:03:53
00:04:17	35.59	50.67	25.74	36.29	107	00:03:54
00:04:18	35.59	51.19	25.75	36.29	106	00:03:55
00:04:20	35.58	50.74	25.74	36.28	106	00:03:56
00:04:21	35.57	50.42	25.73	36.27	106	00:03:57
00:04:22	35.58	50.55	25.74	36.28	107	00:03:58
00:04:23	35.58	50.45	25.74	36.28	107	00:03:59
00:04:24	35.57	50.42	25.73	36.27	106	00:04:00
00:04:25	35.56	50.45	25.74	36.26	106	00:04:01
00:04:26	35.56	50.41	25.73	36.26	104	00:04:02
00:04:27	35.54	50.51	25.74	36.24	104	00:04:03
00:04:28	35.54	50.48	25.74	36.24	103	00:04:04
00:04:29	35.54	50	25.73	36.24	103	00:04:05
00:04:30	35.55	50.25	25.72	36.25	102	00:04:06
00:04:31	35.55	51.38	25.73	36.25	102	00:04:07
00:04:32	35.55	51.44	25.72	36.25	101	00:04:08
00:04:33	35.55	50.41	25.7	36.25	102	00:04:09
00:04:34	35.55	49.38	25.7	36.25	102	00:04:10
00:04:36	35.54	48.43	25.68	36.24	101	00:04:11
00:04:37	35.55	47.75	25.66	36.25	101	00:04:12
00:04:38	35.54	47.36	25.66	36.24	101	00:04:13
00:04:39	35.53	46.96	25.64	36.23	102	00:04:14
00:04:40	35.52	46.54	25.64	36.22	103	00:04:15
00:04:41	35.52	46.24	25.63	36.22	104	00:04:16
00:04:42	35.51	46.04	25.63	36.21	105	00:04:17
00:04:43	35.51	46.11	25.62	36.21	105	00:04:18
00:04:44	35.5	45.91	25.62	36.2	106	00:04:19
00:04:45	35.5	46.04	25.62	36.2	105	00:04:20
00:04:46	35.49	46.1	25.62	36.19	105	00:04:21
00:04:47	35.47	45.64	25.6	36.17	105	00:04:22
00:04:48	35.47	45.18	25.6	36.17	105	00:04:23
00:04:49	35.45	45.51	25.59	36.15	105	00:04:24
00:04:51	35.43	47.05	25.58	36.13	105	00:04:25
00:04:52	35.42	48.75	25.58	36.12	104	00:04:26
00:04:53	35.41	51.14	25.59	36.11	105	00:04:27
00:04:54	35.4	53.59	25.59	36.1	106	00:04:28
00:04:55	35.38	55.32	25.59	36.08	106	00:04:29
00:04:56	35.37	56.44	25.6	36.07	106	00:04:30
00:04:57	35.36	56.81	25.61	36.06	107	00:04:31
00:04:58	35.35	57.09	25.6	36.05	108	00:04:32
00:04:59	35.34	56.91	25.61	36.04	109	00:04:33
00:05:00	35.34	56.69	25.6	36.04	109	00:04:34
00:05:01	35.32	57	25.61	36.02	109	00:04:35
00:05:02	35.33	57.5	25.62	36.03	108	00:04:36
00:05:03	35.33	58.36	25.62	36.03	107	00:04:37
00:05:04	35.34	58.85	25.61	36.04	107	00:04:38
00:05:05	35.35	58.91	25.61	36.05	107	00:04:39
00:05:07	35.35	58.58	25.62	36.05	107	00:04:40
00:05:08	35.33	58.42	25.62	36.03	107	00:04:41
00:05:09	35.33	59.43	25.62	36.03	108	00:04:42
00:05:10	35.33	59.71	25.63	36.03	108	00:04:43
00:05:11	35.33	59.34	25.63	36.03	108	00:04:44
00:05:12	35.33	58.88	25.63	36.03	107	00:04:45
00:05:13	35.33	58.55	25.62	36.03	106	00:04:46
00:05:14	35.34	58.39	25.63	36.04	106	00:04:47
00:05:15	35.34	58.21	25.64	36.04	106	00:04:48
00:05:16	35.33	57.72	25.63	36.03	106	00:04:49
00:05:17	35.34	57.22	25.64	36.04	107	00:04:50
00:05:18	35.34	57.16	25.64	36.04	108	00:04:51
00:05:19	35.34	58.12	25.64	36.04	108	00:04:52
00:05:20	35.35	58.46	25.64	36.05	108	00:04:53
00:05:21	35.35	58.67	25.65	36.05	107	00:04:54
00:05:23	35.36	58.89	25.65	36.06	106	00:04:55
00:05:24	35.35	60.11	25.65	36.05	107	00:04:56
00:05:25	35.36	61.21	25.65	36.06	107	00:04:57
00:05:26	35.36	61.75	25.67	36.06	107	00:04:58
00:05:27	35.37	61.38	25.66	36.07	108	00:04:59
00:05:28	35.37	61.17	25.67	36.07	110	00:05:00
00:05:29	35.37	61.14	25.65	36.07	111	00:05:01
00:05:30	35.37	61.02	25.67	36.07	112	00:05:02
00:05:31	35.37	60.78	25.67	36.07	113	00:05:03
00:05:32	35.36	60.57	25.68	36.06	113	00:05:04
00:05:33	35.37	61.63	25.67	36.07	113	00:05:05
00:05:34	35.37	62.95	25.68	36.07	113	00:05:06
00:05:35	35.37	63.16	25.68	36.07	113	00:05:07
00:05:36	35.37	63.16	25.7	36.07	112	00:05:08
00:05:38	35.37	62.74	25.69	36.07	112	00:05:09
00:05:39	35.37	62.84	25.7	36.07	111	00:05:10
00:05:40	35.37	64.15	25.73	36.07	109	00:05:11
00:05:41	35.37	64.59	25.72	36.07	109	00:05:12
00:05:42	35.37	63.22	25.7	36.07	109	00:05:13
00:05:43	35.37	61.09	25.7	36.07	109	00:05:14
00:05:44	35.36	60.54	25.7	36.06	108	00:05:15
00:05:45	35.36	60.3	25.7	36.06	109	00:05:16
00:05:46	35.36	60.18	25.7	36.06	109	00:05:17
00:05:47	35.36	59.93	25.7	36.06	109	00:05:18
00:05:48	35.36	59.26	25.69	36.06	110	00:05:19
00:05:49	35.35	58.16	25.68	36.05	110	00:05:20
00:05:50	35.35	57.23	25.68	36.05	110	00:05:21
00:05:51	35.34	56.98	25.69	36.04	109	00:05:22
00:05:52	35.33	57.69	25.68	36.03	110	00:05:23
00:05:54	35.33	58.22	25.69	36.03	111	00:05:24
00:05:55	35.32	58.62	25.7	36.02	112	00:05:25
00:05:56	35.32	59.2	25.7	36.02	112	00:05:26
00:05:57	35.32	59.6	25.7	36.02	112	00:05:27
00:05:58	35.32	60.36	25.7	36.02	106	00:05:28
00:05:59	35.32	60.61	25.71	36.02	100	00:05:29
00:06:00	35.33	60.49	25.72	36.03	98	00:05:30
00:06:01	35.33	60.15	25.71	36.03	98	00:05:31
00:06:02	35.32	60.24	25.72	36.02	98	00:05:32
00:06:03	35.31	61.52	25.72	36.01	98	00:05:33
00:06:04	35.3	62.45	25.73	36	98	00:05:34
00:06:05	35.3	63.41	25.73	36	97	00:05:35
00:06:06	35.29	63.65	25.74	35.99	97	00:05:36
00:06:07	35.29	63.41	25.73	35.99	97	00:05:37
00:06:09	35.29	61.63	25.72	35.99	97	00:05:38
00:06:10	35.29	59.39	25.71	35.99	96	00:05:39
00:06:11	35.28	58.13	25.7	35.98	96	00:05:40
00:06:12	35.29	57.51	25.72	35.99	97	00:05:41
00:06:13	35.28	56.89	25.7	35.98	98	00:05:42
00:06:14	35.28	57.17	25.7	35.98	100	00:05:43
00:06:15	35.28	56.61	25.7	35.98	101	00:05:44
00:06:16	35.27	56.11	25.7	35.97	101	00:05:45
00:06:17	35.27	55.58	25.7	35.97	103	00:05:46
00:06:18	35.27	54.92	25.69	35.97	104	00:05:47
00:06:19	35.26	53.79	25.66	35.96	104	00:05:48
00:06:20	35.26	53.28	25.66	35.96	105	00:05:49
00:06:21	35.25	53.22	25.66	35.95	106	00:05:50
00:06:22	35.25	52.99	25.66	35.95	107	00:05:51
00:06:23	35.23	52.29	25.66	35.93	107	00:05:52
00:06:25	35.23	51.4	25.65	35.93	108	00:05:53
00:06:26	35.23	50.56	25.63	35.93	108	00:05:54
00:06:27	35.22	50.05	25.62	35.92	108	00:05:55
00:06:28	35.22	49.66	25.63	35.92	104	00:05:56
00:06:29	35.23	49.14	25.61	35.93	103	00:05:57
00:06:30	35.23	48.59	25.6	35.93	101	00:05:58
00:06:31	35.22	48	25.59	35.92	99	00:05:59
00:06:32	35.21	47.61	25.58	35.91	98	00:06:00
00:06:33	35.21	47.08	25.57	35.91	98	00:06:01
00:06:34	35.2	46.66	25.56	35.9	98	00:06:02
00:06:35	35.2	46.36	25.55	35.9	99	00:06:03
00:06:36	35.21	46.2	25.55	35.91	102	00:06:04
00:06:37	35.2	46.49	25.54	35.9	103	00:06:05
00:06:38	35.19	46.89	25.54	35.89	104	00:06:06
00:06:40	35.19	47.18	25.54	35.89	104	00:06:07
00:06:41	35.18	47.41	25.54	35.88	104	00:06:08
00:06:42	35.17	47.57	25.54	35.87	106	00:06:09
00:06:43	35.16	47.77	25.54	35.86	105	00:06:10
00:06:44	35.16	47.99	25.53	35.86	106	00:06:11
00:06:45	35.15	47.86	25.54	35.85	106	00:06:12
00:06:46	35.15	47.86	25.53	35.85	106	00:06:13
00:06:47	35.15	47.7	25.52	35.85	107	00:06:14
00:06:48	35.14	47.47	25.52	35.84	109	00:06:15
00:06:49	35.14	47.4	25.53	35.84	110	00:06:16
00:06:50	35.12	47.27	25.52	35.82	109	00:06:17
00:06:51	35.12	47.21	25.53	35.82	109	00:06:18
00:06:52	35.12	47.14	25.5	35.82	108	00:06:19
00:06:53	35.12	46.98	25.51	35.82	107	00:06:20
00:06:54	35.12	46.81	25.49	35.82	107	00:06:21
00:06:56	35.14	46.78	25.5	35.84	107	00:06:22
00:06:57	35.14	47.14	25.51	35.84	108	00:06:23
00:06:58	35.14	47.24	25.51	35.84	107	00:06:24
00:06:59	35.12	47.27	25.5	35.82	106	00:06:25
00:07:00	35.11	47.4	25.5	35.81	106	00:06:26
00:07:01	35.09	47.47	25.5	35.79	105	00:06:27
00:07:02	35.07	47.56	25.49	35.77	105	00:06:28
00:07:03	35.06	47.53	25.48	35.76	105	00:06:29
00:07:04	35.07	47.47	25.48	35.77	103	00:06:30
00:07:05	35.06	47.37	25.49	35.76	103	00:06:31
00:07:06	35.08	47.4	25.48	35.78	102	00:06:32
00:07:07	35.07	47.63	25.48	35.77	102	00:06:33
00:07:08	35.06	47.69	25.48	35.76	102	00:06:34
00:07:09	35.06	47.82	25.48	35.76	102	00:06:35
00:07:11	35.05	47.73	25.48	35.75	103	00:06:36
00:07:12	35.04	47.56	25.46	35.74	104	00:06:37
00:07:13	35.05	47.37	25.47	35.75	104	00:06:38
00:07:14	35.05	47.2	25.46	35.75	106	00:06:39
00:07:15	35.05	47.1	25.46	35.75	107	00:06:40
00:07:16	35.05	47.27	25.47	35.75	109	00:06:41
00:07:17	35.05	47.73	25.46	35.75	110	00:06:42
00:07:18	35.04	48.25	25.48	35.74	110	00:06:43
00:07:19	35.03	48.6	25.48	35.73	109	00:06:44
00:07:20	35.03	48.67	25.46	35.73	108	00:06:45
00:07:21	35.02	48.8	25.46	35.72	107	00:06:46
00:07:22	35.02	49.19	25.46	35.72	105	00:06:47
00:07:23	35.03	49.64	25.46	35.73	103	00:06:48
00:07:24	35.02	50.22	25.46	35.72	104	00:06:49
00:07:25	35.02	50.96	25.47	35.72	104	00:06:50
00:07:27	35.02	51.63	25.46	35.72	104	00:06:51
00:07:28	35.02	52.27	25.46	35.72	104	00:06:52
00:07:29	35.01	52.62	25.47	35.71	105	00:06:53
00:07:30	35.02	52.81	25.48	35.72	105	00:06:54
00:07:31	35.02	52.91	25.47	35.72	105	00:06:55
00:07:32	35.02	53.13	25.48	35.72	105	00:06:56
00:07:33	35.01	53.51	25.5	35.71	105	00:06:57
00:07:34	35	53.7	25.5	35.7	106	00:06:58
00:07:35	34.99	53.83	25.5	35.69	106	00:06:59
00:07:36	34.99	53.98	25.49	35.69	106	00:07:00
00:07:37	35	54.27	25.5	35.7	107	00:07:01
00:07:38	35.01	54.74	25.51	35.71	107	00:07:02
00:07:39	35.02	54.77	25.52	35.72	108	00:07:03
00:07:40	35.01	54.87	25.52	35.71	107	00:07:04
00:07:42	35	55.06	25.53	35.7	108	00:07:05
00:07:43	34.99	55.18	25.52	35.69	107	00:07:06
00:07:44	34.99	55.43	25.53	35.69	107	00:07:07
00:07:45	34.99	55.74	25.54	35.69	107	00:07:08
00:07:46	35	56.12	25.53	35.7	107	00:07:09
00:07:47	35.01	56.59	25.54	35.71	108	00:07:10
00:07:48	35.02	56.96	25.54	35.72	107	00:07:11
00:07:49	35.02	57.74	25.54	35.72	107	00:07:12
00:07:50	35.02	58.32	25.56	35.72	107	00:07:13
00:07:51	35.02	58.17	25.56	35.72	107	00:07:14
00:07:52	35.02	57.92	25.56	35.72	108	00:07:15
00:07:53	35.02	57.86	25.56	35.72	108	00:07:16
00:07:54	35.02	58.14	25.56	35.72	108	00:07:17
00:07:55	35.02	58.57	25.56	35.72	109	00:07:18
00:07:56	35.01	58.85	25.57	35.71	109	00:07:19
00:07:58	35.01	59.15	25.57	35.71	109	00:07:20
00:07:59	35.01	59.58	25.57	35.71	109	00:07:21
00:08:00	35	60.34	25.6	35.7	109	00:07:22
00:08:01	34.99	60.8	25.6	35.69	110	00:07:23
00:08:02	34.99	61.01	25.62	35.69	110	00:07:24
00:08:03	34.98	61.23	25.61	35.68	108	00:07:25
00:08:04	34.97	61.71	25.62	35.67	110	00:07:26
00:08:05	34.97	62.28	25.62	35.67	109	00:07:27
00:08:06	34.98	63.03	25.63	35.68	107	00:07:28
00:08:07	34.99	63.51	25.63	35.69	106	00:07:29
00:08:08	35	63.72	25.62	35.7	105	00:07:30
00:08:09	35	63.66	25.64	35.7	105	00:07:31
00:08:10	35	64.11	25.65	35.7	106	00:07:32
00:08:11	35	64.67	25.64	35.7	106	00:07:33
00:08:13	34.99	65.56	25.66	35.69	106	00:07:34
00:08:14	34.99	66.5	25.66	35.69	106	00:07:35
00:08:15	35	67.61	25.67	35.7	107	00:07:36
00:08:16	35.01	67.84	25.68	35.71	107	00:07:37
00:08:17	35	67.81	25.67	35.7	107	00:07:38
00:08:18	35.02	67.93	25.68	35.72	108	00:07:39
00:08:19	35.03	68.05	25.69	35.73	108	00:07:40
00:08:20	35.04	67.82	25.68	35.74	109	00:07:41
00:08:21	35.04	67.47	25.7	35.74	110	00:07:42
00:08:22	35.05	67.52	25.7	35.75	110	00:07:43
00:08:23	35.05	67.87	25.71	35.75	110	00:07:44
00:08:24	35.05	68.05	25.72	35.75	111	00:07:45
00:08:25	35.05	68.17	25.72	35.75	113	00:07:46
00:08:26	35.06	67.93	25.74	35.76	114	00:07:47
00:08:27	35.06	67.88	25.72	35.76	114	00:07:48
00:08:29	35.06	67.82	25.73	35.76	115	00:07:49
00:08:30	35.06	67.7	25.73	35.76	115	00:07:50
00:08:31	35.06	67.76	25.74	35.76	115	00:07:51
00:08:32	35.06	68.17	25.74	35.76	115	00:07:52
00:08:33	35.05	68.72	25.75	35.75	116	00:07:53
00:08:34	35.07	69.16	25.77	35.77	116	00:07:54
00:08:35	35.07	69.39	25.78	35.77	116	00:07:55
00:08:36	35.06	69.24	25.78	35.76	117	00:07:56
00:08:37	35.07	68.93	25.79	35.77	117	00:07:57
00:08:38	35.07	68.82	25.79	35.77	117	00:07:58
00:08:39	35.07	68.87	25.8	35.77	117	00:07:59
00:08:40	35.08	68.58	25.8	35.78	117	00:08:00
00:08:41	35.08	68.73	25.81	35.78	117	00:08:01
00:08:42	35.1	68.27	25.81	35.8	117	00:08:02
00:08:44	35.1	67.89	25.81	35.8	117	00:08:03
00:08:45	35.1	68.1	25.82	35.8	117	00:08:04
00:08:46	35.09	68.68	25.83	35.79	118	00:08:05
00:08:47	35.09	68.94	25.84	35.79	119	00:08:06
00:08:48	35.08	68.77	25.85	35.78	119	00:08:07
00:08:49	35.09	68.3	25.84	35.79	120	00:08:08
00:08:50	35.09	68.1	25.84	35.79	120	00:08:09
00:08:51	35.1	67.49	25.85	35.8	120	00:08:10
00:08:52	35.1	67.17	25.86	35.8	121	00:08:11
00:08:53	35.12	67.47	25.88	35.82	121	00:08:12
00:08:54	35.12	67.73	25.88	35.82	121	00:08:13
00:08:55	35.12	67.56	25.88	35.82	121	00:08:14
00:08:56	35.12	67.29	25.89	35.82	121	00:08:15
00:08:57	35.12	67.09	25.89	35.82	122	00:08:16
00:08:58	35.13	67.07	25.9	35.83	122	00:08:17
00:09:00	35.12	67.15	25.9	35.82	122	00:08:18
00:09:01	35.12	67.48	25.92	35.82	123	00:08:19
00:09:02	35.13	68.12	25.93	35.83	124	00:08:20
00:09:03	35.13	69.16	25.94	35.83	124	00:08:21
00:09:04	35.13	70.02	25.96	35.83	125	00:08:22
00:09:05	35.13	70.39	25.95	35.83	127	00:08:23
00:09:06	35.14	70.45	25.96	35.84	128	00:08:24
00:09:07	35.14	70.48	25.96	35.84	129	00:08:25
00:09:08	35.14	70.42	25.97	35.84	130	00:08:26
00:09:09	35.14	70.51	25.98	35.84	131	00:08:27
00:09:10	35.16	70.97	25.99	35.86	132	00:08:28
00:09:11	35.17	71.22	25.98	35.87	133	00:08:29
00:09:12	35.17	71.25	25.99	35.87	134	00:08:30
00:09:13	35.18	71.08	26	35.88	135	00:08:31
00:09:15	35.19	70.91	26.01	35.89	136	00:08:32
00:09:16	35.19	70.49	26.01	35.89	137	00:08:33
00:09:17	35.19	69.94	26.01	35.89	139	00:08:34
00:09:18	35.19	69.43	26.02	35.89	140	00:08:35
00:09:19	35.19	69.11	26.01	35.89	140	00:08:36
00:09:20	35.18	68.92	26.04	35.88	130	00:08:37
00:09:21	35.18	69.41	26.04	35.88	126	00:08:38
00:09:22	35.18	69.95	26.06	35.88	125	00:08:39
00:09:23	35.19	70.12	26.06	35.89	125	00:08:40
00:09:24	35.18	70.15	26.06	35.88	125	00:08:41
00:09:25	35.19	69.98	26.06	35.89	125	00:08:42
00:09:26	35.2	69.76	26.08	35.9	125	00:08:43
00:09:27	35.21	69.44	26.08	35.91	124	00:08:44
00:09:28	35.22	69.12	26.08	35.92	123	00:08:45
00:09:29	35.22	68.84	26.08	35.92	122	00:08:46
00:09:31	35.21	68.35	26.09	35.91	122	00:08:47
00:09:32	35.21	68.09	26.09	35.91	122	00:08:48
00:09:33	35.21	68.18	26.1	35.91	122	00:08:49
00:09:34	35.21	68.18	26.12	35.91	122	00:08:50
00:09:35	35.21	68.21	26.12	35.91	121	00:08:51
00:09:36	35.22	68.3	26.13	35.92	120	00:08:52
00:09:37	35.23	68.59	26.13	35.93	119	00:08:53
00:09:38	35.23	69.11	26.15	35.93	117	00:08:54
00:09:39	35.24	69.77	26.15	35.94	117	00:08:55
00:09:40	35.24	70.69	26.17	35.94	115	00:08:56
00:09:41	35.24	71.23	26.18	35.94	115	00:08:57
00:09:42	35.24	71.49	26.18	35.94	115	00:08:58
00:09:43	35.24	72.05	26.18	35.94	115	00:08:59
00:09:44	35.24	72.36	26.2	35.94	117	00:09:00
00:09:46	35.24	72.17	26.2	35.94	118	00:09:01
00:09:47	35.25	71.86	26.2	35.95	118	00:09:02
00:09:48	35.25	71.63	26.22	35.95	119	00:09:03
00:09:49	35.25	71.63	26.22	35.95	118	00:09:04
00:09:50	35.25	71.07	26.22	35.95	117	00:09:05
00:09:51	35.26	70.9	26.23	35.96	117	00:09:06
00:09:52	35.26	71.18	26.24	35.96	117	00:09:07
00:09:53	35.27	71.24	26.24	35.97	119	00:09:08
00:09:54	35.28	71.13	26.25	35.98	120	00:09:09
00:09:55	35.29	70.62	26.25	35.99	120	00:09:10
00:09:56	35.29	70.36	26.25	35.99	121	00:09:11
00:09:57	35.28	69.99	26.27	35.98	122	00:09:12
00:09:58	35.28	69.65	26.27	35.98	124	00:09:13
00:09:59	35.28	69.62	26.28	35.98	125	00:09:14
00:10:00	35.28	69.54	26.3	35.98	125	00:09:15
00:10:02	35.29	69.57	26.29	35.99	125	00:09:16
00:10:03	35.29	69.65	26.3	35.99	125	00:09:17
00:10:04	35.29	69.71	26.31	35.99	125	00:09:18
00:10:05	35.29	69.86	26.32	35.99	124	00:09:19
00:10:06	35.29	69.94	26.32	35.99	125	00:09:20
00:10:07	35.28	69.91	26.32	35.98	122	00:09:21
00:10:08	35.28	69.97	26.33	35.98	121	00:09:22
00:10:09	35.28	69.83	26.34	35.98	120	00:09:23
00:10:10	35.28	69.72	26.36	35.98	120	00:09:24
00:10:11	35.29	69.72	26.36	35.99	118	00:09:25
00:10:12	35.32	70.32	26.36	36.02	118	00:09:26
00:10:13	35.33	70.73	26.38	36.03	118	00:09:27
00:10:14	35.33	71.01	26.38	36.03	120	00:09:28
00:10:15	35.33	71.66	26.4	36.03	123	00:09:29
00:10:17	35.33	71.72	26.4	36.03	125	00:09:30
00:10:18	35.33	71.53	26.41	36.03	127	00:09:31
00:10:19	35.33	71.58	26.41	36.03	127	00:09:32
00:10:20	35.33	71.56	26.41	36.03	128	00:09:33
00:10:21	35.33	71.47	26.43	36.03	128	00:09:34
00:10:22	35.33	71.47	26.44	36.03	128	00:09:35
00:10:23	35.33	71.48	26.43	36.03	128	00:09:36
00:10:24	35.33	71.59	26.45	36.03	128	00:09:37
00:10:25	35.33	71.68	26.44	36.03	129	00:09:38
00:10:26	35.33	71.88	26.47	36.03	131	00:09:39
00:10:27	35.33	72.05	26.47	36.03	132	00:09:40
00:10:28	35.33	72.28	26.48	36.03	133	00:09:41
00:10:29	35.33	72.42	26.49	36.03	134	00:09:42
00:10:30	35.33	72.36	26.5	36.03	136	00:09:43
00:10:31	35.34	72.34	26.5	36.04	136	00:09:44
00:10:33	35.35	72.45	26.52	36.05	138	00:09:45
00:10:34	35.35	72.48	26.51	36.05	140	00:09:46
00:10:35	35.36	72.51	26.52	36.06	140	00:09:47
00:10:36	35.37	72.4	26.52	36.07	140	00:09:48
00:10:37	35.37	71.49	26.52	36.07	134	00:09:49
00:10:38	35.37	70.75	26.54	36.07	125	00:09:50
00:10:39	35.37	70.64	26.55	36.07	118	00:09:51
00:10:40	35.37	71.1	26.57	36.07	116	00:09:52
00:10:41	35.37	71.73	26.57	36.07	115	00:09:53
00:10:42	35.37	72.15	26.58	36.07	115	00:09:54
00:10:43	35.37	72.49	26.58	36.07	115	00:09:55
00:10:44	35.37	72.83	26.58	36.07	115	00:09:56
00:10:45	35.37	73	26.6	36.07	116	00:09:57
00:10:46	35.37	73.14	26.6	36.07	116	00:09:58
00:10:47	35.36	73.09	26.62	36.06	116	00:09:59
00:10:49	35.36	72.92	26.62	36.06	117	00:10:00
00:10:50	35.37	72.78	26.63	36.07	118	00:10:01
00:10:51	35.38	72.87	26.63	36.08	119	00:10:02
00:10:52	35.39	72.81	26.64	36.09	119	00:10:03
00:10:53	35.41	72.7	26.64	36.11	118	00:10:04
00:10:54	35.42	72.62	26.64	36.12	119	00:10:05
00:10:55	35.42	72.56	26.66	36.12	121	00:10:06
00:10:56	35.42	72.59	26.67	36.12	122	00:10:07
00:10:57	35.42	72.65	26.68	36.12	121	00:10:08
00:10:58	35.43	72.77	26.68	36.13	122	00:10:09
00:10:59	35.43	72.99	26.7	36.13	123	00:10:10
00:11:00	35.43	73.07	26.69	36.13	123	00:10:11
00:11:01	35.43	72.96	26.71	36.13	124	00:10:12
00:11:02	35.42	72.88	26.71	36.12	124	00:10:13
00:11:04	35.43	72.74	26.72	36.13	123	00:10:14
00:11:05	35.43	72.46	26.72	36.13	122	00:10:15
00:11:06	35.43	72.43	26.73	36.13	123	00:10:16
00:11:07	35.43	72.32	26.74	36.13	124	00:10:17
00:11:08	35.43	72.52	26.74	36.13	125	00:10:18
00:11:09	35.43	72.84	26.76	36.13	124	00:10:19
00:11:10	35.44	73.34	26.77	36.14	123	00:10:20
00:11:11	35.44	73.65	26.77	36.14	123	00:10:21
00:11:12	35.44	73.45	26.78	36.14	122	00:10:22
00:11:13	35.45	72.87	26.78	36.15	122	00:10:23
00:11:14	35.44	72.45	26.79	36.14	122	00:10:24
00:11:15	35.43	72.22	26.79	36.13	122	00:10:25
00:11:16	35.43	72.17	26.79	36.13	121	00:10:26
00:11:17	35.43	71.97	26.8	36.13	120	00:10:27
00:11:19	35.44	71.88	26.81	36.14	120	00:10:28
00:11:20	35.44	71.8	26.82	36.14	120	00:10:29
00:11:21	35.44	71.6	26.82	36.14	121	00:10:30
00:11:22	35.45	71.4	26.82	36.15	122	00:10:31
00:11:23	35.45	71.29	26.83	36.15	123	00:10:32
00:11:24	35.45	71.18	26.84	36.15	124	00:10:33
00:11:25	35.45	71.15	26.86	36.15	125	00:10:34
00:11:26	35.45	71.67	26.86	36.15	124	00:10:35
00:11:27	35.45	71.7	26.86	36.15	125	00:10:36
00:11:28	35.45	71.61	26.87	36.15	125	00:10:37
00:11:29	35.45	71.53	26.88	36.15	121	00:10:38
00:11:30	35.44	71.5	26.88	36.14	118	00:10:39
00:11:31	35.43	71.53	26.89	36.13	116	00:10:40
00:11:32	35.42	71.65	26.89	36.12	117	00:10:41
00:11:33	35.41	71.76	26.9	36.11	119	00:10:42
00:11:35	35.42	71.76	26.91	36.12	120	00:10:43
00:11:36	35.43	71.79	26.91	36.13	121	00:10:44
00:11:37	35.44	71.85	26.93	36.14	123	00:10:45
00:11:38	35.46	71.85	26.93	36.16	123	00:10:46
00:11:39	35.47	71.99	26.93	36.17	125	00:10:47
00:11:40	35.47	71.97	26.94	36.17	124	00:10:48
00:11:41	35.48	71.85	26.95	36.18	123	00:10:49
00:11:42	35.48	71.88	26.96	36.18	123	00:10:50
00:11:43	35.48	71.88	26.96	36.18	124	00:10:51
00:11:44	35.49	71.86	26.96	36.19	125	00:10:52
00:11:45	35.5	71.83	26.97	36.2	124	00:10:53
00:11:46	35.51	71.72	26.97	36.21	124	00:10:54
00:11:47	35.5	71.63	26.98	36.2	124	00:10:55
00:11:48	35.49	71.6	26.98	36.19	123	00:10:56
00:11:50	35.49	71.15	26.98	36.19	122	00:10:57
00:11:51	35.49	70.98	27	36.19	121	00:10:58
00:11:52	35.49	71.38	27.01	36.19	120	00:10:59
00:11:53	35.5	71.73	27.02	36.2	119	00:11:00
00:11:54	35.5	71.9	27.03	36.2	119	00:11:01
00:11:55	35.5	71.7	27.02	36.2	120	00:11:02
00:11:56	35.49	71.47	27.05	36.19	120	00:11:03
00:11:57	35.49	71.45	27.06	36.19	120	00:11:04
00:11:58	35.48	71.28	27.05	36.18	121	00:11:05
00:11:59	35.49	71.22	27.06	36.19	122	00:11:06
00:12:00	35.49	70.96	27.07	36.19	122	00:11:07
00:12:01	35.5	70.68	27.07	36.2	122	00:11:08
00:12:02	35.51	70.48	27.07	36.21	123	00:11:09
00:12:03	35.51	70.4	27.09	36.21	124	00:11:10
00:12:04	35.51	70.29	27.08	36.21	125	00:11:11
00:12:06	35.51	70.06	27.09	36.21	125	00:11:12
00:12:07	35.51	70.03	27.11	36.21	125	00:11:13
00:12:08	35.51	69.68	27.12	36.21	125	00:11:14
00:12:09	35.51	69.42	27.12	36.21	125	00:11:15
00:12:10	35.51	69.8	27.13	36.21	125	00:11:16
00:12:11	35.51	70.26	27.13	36.21	125	00:11:17
00:12:12	35.51	70.72	27.13	36.21	125	00:11:18
00:12:13	35.51	71.24	27.14	36.21	126	00:11:19
00:12:14	35.51	71.61	27.15	36.21	127	00:11:20
00:12:15	35.51	72.09	27.16	36.21	127	00:11:21
00:12:16	35.51	72.46	27.16	36.21	127	00:11:22
00:12:17	35.51	72.66	27.18	36.21	125	00:11:23
00:12:18	35.51	72.46	27.18	36.21	127	00:11:24
00:12:19	35.51	71.98	27.19	36.21	128	00:11:25
00:12:20	35.5	71.41	27.19	36.2	127	00:11:26
00:12:22	35.5	70.99	27.19	36.2	128	00:11:27
00:12:23	35.5	70.9	27.2	36.2	129	00:11:28
00:12:24	35.49	70.79	27.21	36.19	129	00:11:29
00:12:25	35.49	71.02	27.21	36.19	129	00:11:30
00:12:26	35.5	71.08	27.21	36.2	130	00:11:31
00:12:27	35.5	71.25	27.22	36.2	131	00:11:32
00:12:28	35.5	71.6	27.24	36.2	132	00:11:33
00:12:29	35.51	72.25	27.26	36.21	132	00:11:34
00:12:30	35.51	72.73	27.25	36.21	131	00:11:35
00:12:31	35.51	73.38	27.27	36.21	131	00:11:36
00:12:32	35.51	73.8	27.27	36.21	131	00:11:37
00:12:33	35.51	74.2	27.29	36.21	129	00:11:38
00:12:34	35.51	74.45	27.28	36.21	128	00:11:39
00:12:35	35.51	74.31	27.29	36.21	128	00:11:40
00:12:37	35.51	74.23	27.3	36.21	126	00:11:41
00:12:38	35.51	74.42	27.31	36.21	126	00:11:42
00:12:39	35.52	74.12	27.31	36.22	126	00:11:43
00:12:40	35.52	73.73	27.31	36.22	126	00:11:44
00:12:41	35.52	73.11	27.33	36.22	127	00:11:45
00:12:42	35.53	73	27.33	36.23	127	00:11:46
00:12:43	35.52	73.5	27.34	36.22	127	00:11:47
00:12:44	35.5	73.62	27.34	36.2	127	00:11:48
00:12:45	35.49	73.39	27.34	36.19	128	00:11:49
00:12:46	35.5	73	27.36	36.2	128	00:11:50
00:12:47	35.5	72.66	27.36	36.2	128	00:11:51
00:12:48	35.52	72.41	27.36	36.22	129	00:11:52
00:12:49	35.54	72.5	27.37	36.24	129	00:11:53
00:12:50	35.54	72.59	27.39	36.24	130	00:11:54
00:12:51	35.52	72.62	27.39	36.22	130	00:11:55
00:12:53	35.52	73.12	27.4	36.22	132	00:11:56
00:12:54	35.51	73.66	27.41	36.21	131	00:11:57
00:12:55	35.51	73.58	27.41	36.21	129	00:11:58
00:12:56	35.5	73.04	27.41	36.2	128	00:11:59
00:12:57	35.52	73.66	27.43	36.22	129	00:12:00
00:12:58	35.53	74	27.44	36.23	128	00:12:01
00:12:59	35.53	74.62	27.46	36.23	129	00:12:02
00:13:00	35.52	75.07	27.46	36.22	131	00:12:03
00:13:01	35.53	74.34	27.45	36.23	134	00:12:04
00:13:02	35.52	73.11	27.45	36.22	137	00:12:05
00:13:03	35.52	72.12	27.46	36.22	138	00:12:06
00:13:04	35.51	71.67	27.46	36.21	137	00:12:07
00:13:05	35.5	71.61	27.48	36.2	131	00:12:08
00:13:06	35.49	71.27	27.49	36.19	128	00:12:09
00:13:08	35.48	71.24	27.49	36.18	127	00:12:10
00:13:09	35.48	71.24	27.5	36.18	126	00:12:11
00:13:10	35.49	71.53	27.5	36.19	126	00:12:12
00:13:11	35.51	71.9	27.51	36.21	127	00:12:13
00:13:12	35.52	72.1	27.52	36.22	126	00:12:14
00:13:13	35.52	71.82	27.52	36.22	125	00:12:15
00:13:14	35.52	71.91	27.53	36.22	124	00:12:16
00:13:15	35.52	72.39	27.53	36.22	124	00:12:17
00:13:16	35.51	72.98	27.54	36.21	123	00:12:18
00:13:17	35.51	73.85	27.56	36.21	122	00:12:19
00:13:18	35.51	74.53	27.56	36.21	122	00:12:20
00:13:19	35.52	74.59	27.56	36.22	121	00:12:21
00:13:20	35.52	74.75	27.58	36.22	121	00:12:22
00:13:21	35.52	75.01	27.58	36.22	122	00:12:23
00:13:22	35.52	74.92	27.59	36.22	122	00:12:24
00:13:24	35.51	74.76	27.59	36.21	124	00:12:25
00:13:25	35.51	74.48	27.59	36.21	124	00:12:26
00:13:26	35.51	73.81	27.6	36.21	125	00:12:27
00:13:27	35.52	72.96	27.6	36.22	125	00:12:28
00:13:28	35.52	72.46	27.61	36.22	125	00:12:29
00:13:29	35.52	72.12	27.6	36.22	125	00:12:30
00:13:30	35.53	72.18	27.62	36.23	124	00:12:31
00:13:31	35.53	71.64	27.61	36.23	122	00:12:32
00:13:32	35.51	71.75	27.63	36.21	122	00:12:33
00:13:33	35.51	72.27	27.66	36.21	122	00:12:34
00:13:34	35.49	72.1	27.66	36.19	123	00:12:35
00:13:35	35.49	71.56	27.66	36.19	124	00:12:36
00:13:36	35.5	71.42	27.67	36.2	124	00:12:37
00:13:37	35.5	71.65	27.67	36.2	125	00:12:38
00:13:39	35.5	72.11	27.69	36.2	125	00:12:39
00:13:40	35.51	72.96	27.71	36.21	125	00:12:40
00:13:41	35.51	72.81	27.7	36.21	122	00:12:41
00:13:42	35.51	72.45	27.7	36.21	119	00:12:42
00:13:43	35.5	71.02	27.7	36.2	117	00:12:43
00:13:44	35.5	69.97	27.71	36.2	116	00:12:44
00:13:45	35.5	70.26	27.72	36.2	116	00:12:45
00:13:46	35.5	70.34	27.73	36.2	114	00:12:46
00:13:47	35.5	69.74	27.72	36.2	114	00:12:47
00:13:48	35.51	69.3	27.73	36.21	114	00:12:48
00:13:49	35.51	69.54	27.74	36.21	114	00:12:49
00:13:50	35.5	69.83	27.74	36.2	115	00:12:50
00:13:51	35.49	70.2	27.76	36.19	116	00:12:51
00:13:52	35.49	70.43	27.77	36.19	116	00:12:52
00:13:53	35.48	70.32	27.77	36.18	116	00:12:53
00:13:55	35.49	70.52	27.78	36.19	116	00:12:54
00:13:56	35.49	70.9	27.78	36.19	116	00:12:55
00:13:57	35.5	71.36	27.8	36.2	117	00:12:56
00:13:58	35.5	70.98	27.79	36.2	117	00:12:57
00:13:59	35.5	70.99	27.8	36.2	116	00:12:58
00:14:00	35.49	71.96	27.82	36.19	116	00:12:59
00:14:01	35.49	71.42	27.81	36.19	117	00:13:00
00:14:02	35.48	70.42	27.82	36.18	117	00:13:01
00:14:03	35.47	69.96	27.82	36.17	118	00:13:02
00:14:04	35.48	70.48	27.84	36.18	118	00:13:03
00:14:05	35.47	70.82	27.84	36.17	119	00:13:04
00:14:06	35.47	70.19	27.83	36.17	119	00:13:05
00:14:07	35.48	69.67	27.84	36.18	121	00:13:06
00:14:08	35.47	69.35	27.85	36.17	121	00:13:07
00:14:10	35.47	69.12	27.86	36.17	122	00:13:08
00:14:11	35.46	68.72	27.85	36.16	122	00:13:09
00:14:12	35.46	68.4	27.87	36.16	123	00:13:10
00:14:13	35.45	68.14	27.87	36.15	124	00:13:11
00:14:14	35.45	68.11	27.87	36.15	126	00:13:12
00:14:15	35.46	68.14	27.88	36.16	126	00:13:13
00:14:16	35.47	68.29	27.89	36.17	126	00:13:14
00:14:17	35.47	68.08	27.88	36.17	125	00:13:15
00:14:18	35.47	67.56	27.89	36.17	125	00:13:16
00:14:19	35.47	67.5	27.9	36.17	126	00:13:17
00:14:20	35.46	67.3	27.9	36.16	127	00:13:18
00:14:21	35.46	66.77	27.92	36.16	127	00:13:19
00:14:22	35.47	66.21	27.92	36.17	128	00:13:20
00:14:23	35.47	65.76	27.91	36.17	129	00:13:21
00:14:24	35.47	66.51	27.93	36.17	129	00:13:22
00:14:26	35.47	67.47	27.94	36.17	129	00:13:23
00:14:27	35.47	67.71	27.93	36.17	129	00:13:24
00:14:28	35.46	67.27	27.94	36.16	130	00:13:25
00:14:29	35.46	66.78	27.95	36.16	129	00:13:26
00:14:30	35.46	66.98	27.96	36.16	130	00:13:27
00:14:31	35.46	66.89	27.96	36.16	130	00:13:28
00:14:32	35.46	66.72	27.96	36.16	131	00:13:29
00:14:33	35.46	66.95	27.97	36.16	131	00:13:30
00:14:34	35.46	67.13	27.97	36.16	132	00:13:31
00:14:35	35.46	67.19	27.98	36.16	132	00:13:32
00:14:36	35.45	67.07	27.98	36.15	132	00:13:33
00:14:37	35.45	67.13	27.99	36.15	133	00:13:34
00:14:38	35.44	67.28	27.99	36.14	134	00:13:35
00:14:39	35.43	66.87	28	36.13	134	00:13:36
00:14:41	35.42	66.07	28	36.12	135	00:13:37
00:14:42	35.41	65.12	28.01	36.11	135	00:13:38
00:14:43	35.4	64.59	28.01	36.1	136	00:13:39
00:14:44	35.4	64.68	28.01	36.1	137	00:13:40
00:14:45	35.4	64.89	28.02	36.1	136	00:13:41
00:14:46	35.4	65.63	28.02	36.1	137	00:13:42
00:14:47	35.4	65.84	28.02	36.1	136	00:13:43
00:14:48	35.41	66.11	28.03	36.11	136	00:13:44
00:14:49	35.41	66.82	28.04	36.11	135	00:13:45
00:14:50	35.4	66.23	28.05	36.1	134	00:13:46
00:14:51	35.4	65.49	28.05	36.1	133	00:13:47
00:14:52	35.41	64.74	28.04	36.11	132	00:13:48
00:14:53	35.41	63.61	28.04	36.11	131	00:13:49
00:14:54	35.42	62.76	28.04	36.12	126	00:13:50
00:14:55	35.42	62.1	28.03	36.12	123	00:13:51
00:14:57	35.41	61.67	28.04	36.11	121	00:13:52
00:14:58	35.41	62.07	28.05	36.11	121	00:13:53
00:14:59	35.41	63.04	28.06	36.11	120	00:13:54
00:15:00	35.41	64.3	28.07	36.11	122	00:13:55
00:15:01	35.41	64.93	28.07	36.11	122	00:13:56
00:15:02	35.42	65.73	28.08	36.12	125	00:13:57
00:15:03	35.41	66.15	28.09	36.11	125	00:13:58
00:15:04	35.4	66.65	28.08	36.1	125	00:13:59
00:15:05	35.39	67.36	28.09	36.09	126	00:14:00
00:15:06	35.38	67.74	28.1	36.08	126	00:14:01
00:15:07	35.37	68.18	28.11	36.07	126	00:14:02
00:15:08	35.37	68.53	28.11	36.07	125	00:14:03
00:15:09	35.37	68.24	28.11	36.07	125	00:14:04
00:15:10	35.36	67.89	28.12	36.06	123	00:14:05
00:15:11	35.35	67.8	28.12	36.05	124	00:14:06
00:15:13	35.34	67.36	28.13	36.04	125	00:14:07
00:15:14	35.34	66.95	28.12	36.04	125	00:14:08
00:15:15	35.33	66.8	28.14	36.03	125	00:14:09
00:15:16	35.33	67.34	28.13	36.03	125	00:14:10
00:15:17	35.33	68.01	28.13	36.03	126	00:14:11
00:15:18	35.33	68.54	28.15	36.03	125	00:14:12
00:15:19	35.34	69.09	28.17	36.04	124	00:14:13
00:15:20	35.34	69.38	28.16	36.04	123	00:14:14
00:15:21	35.33	69.61	28.17	36.03	122	00:14:15
00:15:22	35.33	69.79	28.18	36.03	120	00:14:16
00:15:23	35.33	69.79	28.16	36.03	117	00:14:17
00:15:24	35.34	70.05	28.17	36.04	116	00:14:18
00:15:25	35.35	69.76	28.18	36.05	116	00:14:19
00:15:26	35.35	68.48	28.18	36.05	115	00:14:20
00:15:28	35.34	68.07	28.18	36.04	115	00:14:21
00:15:29	35.35	68.34	28.2	36.05	115	00:14:22
00:15:30	35.33	67.37	28.19	36.03	115	00:14:23
00:15:31	35.33	66.31	28.19	36.03	115	00:14:24
00:15:32	35.34	65.21	28.19	36.04	115	00:14:25
00:15:33	35.35	64.5	28.19	36.05	115	00:14:26
00:15:34	35.34	64.68	28.2	36.04	115	00:14:27
00:15:35	35.35	65.69	28.2	36.05	116	00:14:28
00:15:36	35.34	66.64	28.21	36.04	117	00:14:29
00:15:37	35.33	65.57	28.19	36.03	118	00:14:30
00:15:38	35.34	64.41	28.2	36.04	118	00:14:31
00:15:39	35.34	63.87	28.21	36.04	119	00:14:32
00:15:40	35.34	64.08	28.21	36.04	122	00:14:33
00:15:41	35.34	64.41	28.22	36.04	124	00:14:34
00:15:43	35.33	65.31	28.22	36.03	124	00:14:35
00:15:44	35.34	65.19	28.23	36.04	125	00:14:36
00:15:45	35.33	65.01	28.23	36.03	125	00:14:37
00:15:46	35.33	64.02	28.22	36.03	125	00:14:38
00:15:47	35.33	63.6	28.22	36.03	125	00:14:39
00:15:48	35.33	62.76	28.22	36.03	124	00:14:40
00:15:49	35.32	62.18	28.21	36.02	124	00:14:41
00:15:50	35.33	61.3	28.22	36.03	123	00:14:42
00:15:51	35.33	60.44	28.22	36.03	122	00:14:43
00:15:52	35.33	59.99	28.22	36.03	122	00:14:44
00:15:53	35.32	59.68	28.22	36.02	122	00:14:45
00:15:54	35.32	60.45	28.24	36.02	122	00:14:46
00:15:55	35.32	60.17	28.22	36.02	120	00:14:47
00:15:56	35.32	59.03	28.23	36.02	121	00:14:48
00:15:57	35.33	58.32	28.23	36.03	121	00:14:49
00:15:59	35.33	57.51	28.22	36.03	121	00:14:50
00:16:00	35.32	56.35	28.22	36.02	121	00:14:51
00:16:01	35.32	56.35	28.22	36.02	121	00:14:52
00:16:02	35.3	57.04	28.22	36	121	00:14:53
00:16:03	35.29	57.32	28.22	35.99	121	00:14:54
00:16:04	35.29	58.5	28.23	35.99	121	00:14:55
00:16:05	35.29	58.87	28.23	35.99	121	00:14:56
00:16:06	35.29	57.98	28.22	35.99	121	00:14:57
00:16:07	35.31	57.04	28.22	36.01	121	00:14:58
00:16:08	35.31	56.66	28.22	36.01	121	00:14:59
00:16:09	35.32	55.75	28.22	36.02	113	00:15:00
00:16:10	35.3	54.77	28.22	36	111	00:15:01
00:16:11	35.29	54.2	28.2	35.99	111	00:15:02
00:16:12	35.29	53.6	28.21	35.99	112	00:15:03
00:16:14	35.28	52.93	28.21	35.98	114	00:15:04
00:16:15	35.27	52.28	28.2	35.97	116	00:15:05
00:16:16	35.26	51.64	28.2	35.96	117	00:15:06
00:16:17	35.25	51.06	28.2	35.95	118	00:15:07
00:16:18	35.25	50.54	28.18	35.95	119	00:15:08
00:16:19	35.23	50.28	28.18	35.93	120	00:15:09
00:16:20	35.22	49.89	28.18	35.92	121	00:15:10
00:16:21	35.22	49.63	28.18	35.92	122	00:15:11
00:16:22	35.21	49.37	28.16	35.91	122	00:15:12
00:16:23	35.21	49.1	28.16	35.91	122	00:15:13
00:16:24	35.21	49.04	28.16	35.91	123	00:15:14
00:16:25	35.2	48.88	28.16	35.9	125	00:15:15
00:16:26	35.2	48.78	28.15	35.9	126	00:15:16
00:16:27	35.2	48.48	28.15	35.9	127	00:15:17
00:16:28	35.2	48.32	28.13	35.9	128	00:15:18
00:16:30	35.19	48.25	28.13	35.89	129	00:15:19
00:16:31	35.18	48.05	28.12	35.88	130	00:15:20
00:16:32	35.17	47.86	28.12	35.87	131	00:15:21
00:16:33	35.16	47.66	28.12	35.86	132	00:15:22
00:16:34	35.15	47.46	28.12	35.85	132	00:15:23
00:16:35	35.15	47.33	28.1	35.85	133	00:15:24
00:16:36	35.15	47.16	28.08	35.85	134	00:15:25
00:16:37	35.15	46.99	28.1	35.85	134	00:15:26
00:16:38	35.15	46.8	28.08	35.85	134	00:15:27
00:16:39	35.15	46.73	28.08	35.85	135	00:15:28
00:16:40	35.14	46.73	28.08	35.84	135	00:15:29
00:16:41	35.13	46.56	28.07	35.83	135	00:15:30
00:16:42	35.11	46.46	28.05	35.81	134	00:15:31
00:16:43	35.1	46.46	28.06	35.8	135	00:15:32
00:16:44	35.09	46.49	28.04	35.79	134	00:15:33
00:16:46	35.07	46.46	28.04	35.77	134	00:15:34
00:16:47	35.06	46.53	28.03	35.76	135	00:15:35
00:16:48	35.06	46.32	28.02	35.76	136	00:15:36
00:16:49	35.03	46.29	28.02	35.73	138	00:15:37
00:16:50	35.03	46.12	28.01	35.73	140	00:15:38
00:16:51	35.04	45.99	27.99	35.74	140	00:15:39
00:16:52	35.04	45.93	27.99	35.74	140	00:15:40
00:16:53	35.05	46.06	28	35.75	133	00:15:41
00:16:54	35.06	46.09	27.99	35.76	130	00:15:42
00:16:55	35.05	46.16	27.98	35.75	129	00:15:43
00:16:56	35.03	46.12	27.98	35.73	128	00:15:44
00:16:57	35.03	46.12	27.97	35.73	128	00:15:45
00:16:58	35.04	46.12	27.96	35.74	126	00:15:46
00:16:59	35.03	46.05	27.96	35.73	123	00:15:47
00:17:01	35.04	45.85	27.95	35.74	121	00:15:48
00:17:02	35.03	45.65	27.95	35.73	120	00:15:49
00:17:03	35.04	45.42	27.94	35.74	121	00:15:50
00:17:04	35.03	45.52	27.93	35.73	121	00:15:51
00:17:05	35.03	45.92	27.93	35.73	121	00:15:52
00:17:06	35.02	46.51	27.92	35.72	120	00:15:53
00:17:07	35.03	46.84	27.92	35.73	119	00:15:54
00:17:08	35.02	47.14	27.93	35.72	119	00:15:55
00:17:09	35.02	47.44	27.91	35.72	118	00:15:56
00:17:10	35.02	47.57	27.9	35.72	116	00:15:57
00:17:11	35.03	48.65	27.91	35.73	112	00:15:58
00:17:12	35.01	49.98	27.9	35.71	111	00:15:59
00:17:14	35	49.91	27.88	35.7	112	00:16:00
00:17:15	35	48.9	27.86	35.7	112	00:16:01
00:17:16	34.98	48.15	27.85	35.68	113	00:16:02
00:17:17	34.98	47.46	27.84	35.68	112	00:16:03
00:17:18	34.96	46.83	27.82	35.66	111	00:16:04
00:17:19	34.95	46.5	27.83	35.65	107	00:16:05
00:17:20	34.94	46.24	27.82	35.64	105	00:16:06
00:17:21	34.92	46	27.82	35.62	104	00:16:07
00:17:22	34.93	45.8	27.81	35.63	104	00:16:08
00:17:23	34.93	45.7	27.8	35.63	104	00:16:09
00:17:24	34.94	45.53	27.8	35.64	106	00:16:10
00:17:26	34.95	45.44	27.78	35.65	107	00:16:11
00:17:27	34.97	45.37	27.77	35.67	107	00:16:12
00:17:28	34.97	45.23	27.76	35.67	108	00:16:13
00:17:29	34.98	44.86	27.76	35.68	108	00:16:14
00:17:30	34.97	44.66	27.75	35.67	109	00:16:15
00:17:31	34.96	44.6	27.74	35.66	110	00:16:16
00:17:32	34.95	44.83	27.72	35.65	110	00:16:17
00:17:33	34.94	44.83	27.72	35.64	110	00:16:18
00:17:34	34.92	44.73	27.72	35.62	110	00:16:19
00:17:35	34.92	44.76	27.7	35.62	111	00:16:20
00:17:36	34.91	44.92	27.69	35.61	111	00:16:21
00:17:37	34.9	45.02	27.67	35.6	111	00:16:22
00:17:38	34.89	44.86	27.68	35.59	110	00:16:23
00:17:40	34.88	44.99	27.66	35.58	110	00:16:24
00:17:41	34.88	44.99	27.66	35.58	109	00:16:25
00:17:42	34.87	44.82	27.64	35.57	108	00:16:26
00:17:43	34.86	44.79	27.65	35.56	109	00:16:27
00:17:44	34.86	44.89	27.65	35.56	110	00:16:28
00:17:45	34.86	44.72	27.63	35.56	111	00:16:29
00:17:46	34.85	44.82	27.62	35.55	111	00:16:30
00:17:47	34.85	45.28	27.63	35.55	113	00:16:31
00:17:48	34.85	45.48	27.62	35.55	114	00:16:32
00:17:49	34.85	45.35	27.62	35.55	114	00:16:33
00:17:50	34.85	45.18	27.61	35.55	115	00:16:34
00:17:51	34.85	45.28	27.61	35.55	114	00:16:35
00:17:52	34.84	45.15	27.6	35.54	114	00:16:36
00:17:53	34.83	45.61	27.58	35.53	114	00:16:37
00:17:54	34.82	46.74	27.58	35.52	112	00:16:38
00:17:56	34.82	47.72	27.58	35.52	112	00:16:39
00:17:57	34.81	48.77	27.59	35.51	113	00:16:40
00:17:58	34.8	49.16	27.58	35.5	112	00:16:41
00:17:59	34.81	48.87	27.56	35.51	112	00:16:42
00:18:00	34.81	48.38	27.57	35.51	113	00:16:43
00:18:01	34.81	48.08	27.56	35.51	112	00:16:44
00:18:02	34.81	47.78	27.56	35.51	113	00:16:45
00:18:03	34.82	47.46	27.56	35.52	112	00:16:46
00:18:04	34.81	47.23	27.55	35.51	112	00:16:47
00:18:05	34.81	47.39	27.55	35.51	112	00:16:48
00:18:06	34.81	47.98	27.55	35.51	113	00:16:49
00:18:07	34.8	48.86	27.54	35.5	113	00:16:50
00:18:08	34.8	49.78	27.55	35.5	114	00:16:51
00:18:09	34.8	50.78	27.54	35.5	113	00:16:52
00:18:11	34.8	51.49	27.53	35.5	113	00:16:53
00:18:12	34.8	52.07	27.53	35.5	114	00:16:54
00:18:13	34.81	52.13	27.54	35.51	114	00:16:55
00:18:14	34.8	52.03	27.52	35.5	114	00:16:56
00:18:15	34.79	52.06	27.52	35.49	115	00:16:57
00:18:16	34.78	52.1	27.52	35.48	115	00:16:58
00:18:17	34.77	52.35	27.51	35.47	114	00:16:59
00:18:18	34.76	52.67	27.52	35.46	114	00:17:00
00:18:19	34.76	53.09	27.5	35.46	115	00:17:01
00:18:20	34.77	53.53	27.51	35.47	115	00:17:02
00:18:21	34.78	54.2	27.51	35.48	114	00:17:03
00:18:22	34.79	54.23	27.5	35.49	113	00:17:04
00:18:23	34.8	53.66	27.5	35.5	112	00:17:05
00:18:24	34.8	53.28	27.49	35.5	113	00:17:06
00:18:25	34.8	52.67	27.49	35.5	112	00:17:07
00:18:27	34.8	51.87	27.5	35.5	112	00:17:08
00:18:28	34.8	51.29	27.48	35.5	112	00:17:09
00:18:29	34.8	51.48	27.48	35.5	112	00:17:10
00:18:30	34.8	51.35	27.48	35.5	114	00:17:11
00:18:31	34.8	50.9	27.48	35.5	113	00:17:12
00:18:32	34.79	51.09	27.47	35.49	112	00:17:13
00:18:33	34.79	50.71	27.47	35.49	112	00:17:14
00:18:34	34.78	49.83	27.46	35.48	112	00:17:15
00:18:35	34.77	48.92	27.44	35.47	113	00:17:16
00:18:36	34.76	49.73	27.44	35.46	114	00:17:17
00:18:37	34.76	50.9	27.44	35.46	115	00:17:18
00:18:38	34.76	51.54	27.45	35.46	116	00:17:19
00:18:39	34.76	51.22	27.43	35.46	116	00:17:20
00:18:40	34.76	50.25	27.42	35.46	117	00:17:21
00:18:42	34.76	49.44	27.42	35.46	116	00:17:22
00:18:43	34.75	48.81	27.42	35.45	115	00:17:23
00:18:44	34.75	48.49	27.41	35.45	115	00:17:24
00:18:45	34.75	48.13	27.41	35.45	115	00:17:25
00:18:46	34.74	47.73	27.4	35.44	114	00:17:26
00:18:47	34.74	47.44	27.39	35.44	114	00:17:27
00:18:48	34.75	47.21	27.39	35.45	113	00:17:28
00:18:49	34.75	46.78	27.38	35.45	112	00:17:29
00:18:50	34.75	46.88	27.38	35.45	112	00:17:30
00:18:51	34.76	46.94	27.36	35.46	113	00:17:31
00:18:52	34.76	46.91	27.36	35.46	113	00:17:32
00:18:53	34.76	46.67	27.36	35.46	112	00:17:33
00:18:54	34.76	46.31	27.35	35.46	112	00:17:34
00:18:55	34.75	46.08	27.34	35.45	112	00:17:35
00:18:56	34.74	45.85	27.32	35.44	113	00:17:36
00:18:58	34.73	45.65	27.31	35.43	113	00:17:37
00:18:59	34.73	45.58	27.31	35.43	115	00:17:38
00:19:00	34.72	45.51	27.3	35.42	115	00:17:39
00:19:01	34.72	45.44	27.31	35.42	115	00:17:40
00:19:02	34.72	45.38	27.28	35.42	115	00:17:41
00:19:03	34.72	45.41	27.28	35.42	116	00:17:42
00:19:04	34.71	45.44	27.27	35.41	115	00:17:43
00:19:05	34.7	45.41	27.26	35.4	115	00:17:44
00:19:06	34.69	45.34	27.27	35.39	115	00:17:45
00:19:07	34.68	45.17	27.24	35.38	114	00:17:46
00:19:08	34.67	45.24	27.26	35.37	114	00:17:47
00:19:09	34.67	45.64	27.26	35.37	113	00:17:48
00:19:10	34.67	45.67	27.25	35.37	113	00:17:49
00:19:11	34.67	46	27.24	35.37	113	00:17:50
00:19:12	34.67	46.56	27.24	35.37	112	00:17:51
00:19:14	34.66	46.92	27.24	35.36	112	00:17:52
00:19:15	34.65	47.06	27.24	35.35	112	00:17:53
00:19:16	34.64	46.89	27.24	35.34	110	00:17:54
00:19:17	34.63	47.02	27.23	35.33	110	00:17:55
00:19:18	34.62	47.02	27.23	35.32	111	00:17:56
00:19:19	34.62	46.89	27.22	35.32	111	00:17:57
00:19:20	34.62	46.89	27.21	35.32	111	00:17:58
00:19:21	34.61	47.02	27.2	35.31	112	00:17:59
00:19:22	34.61	47.09	27.21	35.31	113	00:18:00
00:19:23	34.58	47.32	27.2	35.28	111	00:18:01
00:19:24	34.54	47.25	27.2	35.24	110	00:18:02
00:19:25	34.51	47.02	27.2	35.21	110	00:18:03
00:19:26	34.48	46.82	27.18	35.18	111	00:18:04
00:19:27	34.46	46.62	27.18	35.16	112	00:18:05
00:19:29	34.44	46.46	27.17	35.14	114	00:18:06
00:19:30	34.39	46.29	27.17	35.09	115	00:18:07
00:19:31	34.36	46.16	27.16	35.06	115	00:18:08
00:19:32	34.34	45.82	27.14	35.04	116	00:18:09
00:19:33	34.32	45.82	27.14	35.02	117	00:18:10
00:19:34	34.29	45.69	27.14	34.99	118	00:18:11
00:19:35	34.29	45.69	27.12	34.99	119	00:18:12
00:19:36	34.28	45.69	27.13	34.98	120	00:18:13
00:19:37	34.27	45.52	27.12	34.97	122	00:18:14
00:19:38	34.26	45.29	27.11	34.96	123	00:18:15
00:19:39	34.26	45.42	27.1	34.96	124	00:18:16
00:19:40	34.21	45.42	27.1	34.91	126	00:18:17
00:19:41	34.17	45.25	27.08	34.87	126	00:18:18
00:19:42	34.13	45.29	27.09	34.83	127	00:18:19
00:19:43	34.09	45.62	27.07	34.79	128	00:18:20
00:19:45	34.04	45.35	27.07	34.74	129	00:18:21
00:19:46	34.01	45.48	27.07	34.71	129	00:18:22
00:19:47	33.99	46.01	27.06	34.69	130	00:18:23
00:19:48	33.95	46.38	27.07	34.65	130	00:18:24
00:19:49	33.92	46.28	27.06	34.62	131	00:18:25
00:19:50	33.89	45.88	27.05	34.59	132	00:18:26
00:19:51	33.87	45.41	27.03	34.57	134	00:18:27
00:19:52	33.83	45.28	27.04	34.53	133	00:18:28
00:19:53	33.8	45.08	27.02	34.5	133	00:18:29
00:19:54	33.77	44.91	27.02	34.47	134	00:18:30
00:19:55	33.68	44.71	27.01	34.38	134	00:18:31
00:19:56	33.63	44.61	27	34.33	133	00:18:32
00:19:57	33.57	44.34	26.98	34.27	132	00:18:33
00:19:58	33.53	44.51	26.99	34.23	131	00:18:34
00:20:00	33.48	44.91	26.99	34.18	128	00:18:35
00:20:01	33.46	45.04	26.98	34.16	125	00:18:36
00:20:02	33.43	45.01	26.98	34.13	123	00:18:37
00:20:03	33.41	44.88	26.96	34.11	122	00:18:38
00:20:04	33.37	44.84	26.97	34.07	119	00:18:39
00:20:05	33.34	44.81	26.96	34.04	116	00:18:40
00:20:06	33.31	44.7	26.95	34.01	114	00:18:41
00:20:07	33.28	44.7	26.94	33.98	112	00:18:42
00:20:08	33.25	44.74	26.93	33.95	110	00:18:43
00:20:09	33.24	44.77	26.93	33.94	108	00:18:44
00:20:10	33.19	45	26.92	33.89	106	00:18:45
00:20:11	33.16	45.1	26.91	33.86	106	00:18:46
00:20:12	33.13	45.07	26.91	33.83	106	00:18:47
00:20:13	33.1	45.07	26.9	33.8	108	00:18:48
00:20:15	33.06	45.13	26.9	33.76	109	00:18:49
00:20:16	33.03	45.1	26.89	33.73	111	00:18:50
00:20:17	33.02	45.06	26.87	33.72	111	00:18:51
00:20:18	32.99	45.16	26.88	33.69	111	00:18:52
00:20:19	32.96	45.26	26.87	33.66	112	00:18:53
00:20:20	32.93	45.53	26.86	33.63	112	00:18:54
00:20:21	32.89	45.79	26.86	33.59	113	00:18:55
00:20:22	32.84	45.89	26.88	33.54	113	00:18:56
00:20:23	32.79	46.12	26.87	33.49	113	00:18:57
00:20:24	32.74	46.22	26.87	33.44	113	00:18:58
00:20:25	32.73	45.99	26.86	33.43	113	00:18:59
00:20:26	32.78	45.66	26.86	33.48	114	00:19:00
00:20:27	32.82	45.46	26.84	33.52	115	00:19:01
00:20:28	32.87	45.32	26.83	33.57	116	00:19:02
00:20:29	32.89	45.26	26.83	33.59	117	00:19:03
00:20:31	32.91	45.22	26.82	33.61	119	00:19:04
00:20:32	32.92	45.25	26.8	33.62	120	00:19:05
00:20:33	32.93	45.26	26.81	33.63	121	00:19:06
00:20:34	32.93	45.15	26.81	33.63	121	00:19:07
00:20:35	32.93	45.19	26.8	33.63	121	00:19:08
00:20:36	32.93	45.32	26.8	33.63	123	00:19:09
00:20:37	32.92	45.45	26.79	33.62	126	00:19:10
00:20:38	32.91	45.78	26.79	33.61	127	00:19:11
00:20:39	32.91	45.91	26.78	33.61	129	00:19:12
00:20:40	32.91	45.98	26.77	33.61	130	00:19:13
00:20:41	32.9	46.01	26.78	33.6	132	00:19:14
00:20:42	32.9	46.04	26.77	33.6	133	00:19:15
00:20:43	32.88	46.24	26.76	33.58	133	00:19:16
00:20:44	32.88	46.41	26.76	33.58	134	00:19:17
00:20:46	32.87	46.57	26.76	33.57	134	00:19:18
00:20:47	32.87	46.8	26.75	33.57	134	00:19:19
00:20:48	32.87	47.1	26.77	33.57	134	00:19:20
00:20:49	32.87	47.36	26.76	33.57	134	00:19:21
00:20:50	32.86	47.49	26.76	33.56	134	00:19:22
00:20:51	32.85	47.62	26.76	33.55	134	00:19:23
00:20:52	32.83	47.82	26.75	33.53	134	00:19:24
00:20:53	32.82	48.05	26.75	33.52	134	00:19:25
00:20:54	32.81	48.02	26.76	33.51	134	00:19:26
00:20:55	32.79	47.95	26.76	33.49	134	00:19:27
00:20:56	32.78	47.82	26.75	33.48	134	00:19:28
00:20:57	32.74	47.82	26.76	33.44	134	00:19:29
00:20:58	32.73	48.01	26.75	33.43	136	00:19:30
00:20:59	32.74	48.31	26.76	33.44	139	00:19:31
00:21:01	32.74	48.53	26.74	33.44	142	00:19:32
00:21:02	32.73	48.99	26.74	33.43	143	00:19:33
00:21:03	32.72	49.32	26.74	33.42	144	00:19:34
00:21:04	32.71	49.71	26.74	33.41	145	00:19:35
00:21:05	32.68	50	26.74	33.38	146	00:19:36
00:21:06	32.67	50.16	26.74	33.37	147	00:19:37
00:21:07	32.64	50.26	26.74	33.34	149	00:19:38
00:21:08	32.62	50.32	26.75	33.32	150	00:19:39
00:21:09	32.61	50.32	26.74	33.31	150	00:19:40
00:21:10	32.59	50.38	26.74	33.29	150	00:19:41
00:21:11	32.55	50.48	26.73	33.25	152	00:19:42
00:21:12	32.53	50.67	26.74	33.23	154	00:19:43
00:21:13	32.51	51.35	26.74	33.21	155	00:19:44
00:21:14	32.49	52.25	26.75	33.19	154	00:19:45
00:21:16	32.49	53.11	26.75	33.19	148	00:19:46
00:21:17	32.48	53.72	26.74	33.18	130	00:19:47
00:21:18	32.46	54.03	26.75	33.16	120	00:19:48
00:21:19	32.44	54.51	26.75	33.14	116	00:19:49
00:21:20	32.42	55.01	26.76	33.12	115	00:19:50
00:21:21	32.4	55.17	26.76	33.1	114	00:19:51
00:21:22	32.35	55.17	26.77	33.05	115	00:19:52
00:21:23	32.33	54.98	26.76	33.03	116	00:19:53
00:21:24	32.31	55.04	26.77	33.01	118	00:19:54
00:21:25	32.28	54.98	26.76	32.98	119	00:19:55
00:21:26	32.25	54.76	26.77	32.95	119	00:19:56
00:21:27	32.24	54.7	26.77	32.94	115	00:19:57
00:21:28	32.23	54.82	26.77	32.93	112	00:19:58
00:21:29	32.22	55.24	26.78	32.92	111	00:19:59
00:21:31	32.21	55.52	26.78	32.91	112	00:20:00
00:21:32	32.19	55.58	26.78	32.89	114	00:20:01
00:21:33	32.17	55.86	26.79	32.87	117	00:20:02
00:21:34	32.16	56.02	26.78	32.86	119	00:20:03
00:21:35	32.15	56.02	26.78	32.85	122	00:20:04
00:21:36	32.12	56.11	26.79	32.82	124	00:20:05
00:21:37	32.08	56.21	26.8	32.78	126	00:20:06
00:21:38	32.05	55.86	26.79	32.75	128	00:20:07
00:21:39	32.01	55.43	26.8	32.71	128	00:20:08
00:21:40	31.98	55.3	26.8	32.68	123	00:20:09
00:21:41	31.93	55.49	26.81	32.63	118	00:20:10
00:21:42	31.91	56.05	26.81	32.61	117	00:20:11
00:21:43	31.88	56.21	26.81	32.58	116	00:20:12
00:21:45	31.85	56.84	26.81	32.55	116	00:20:13
00:21:46	31.84	57.37	26.82	32.54	116	00:20:14
00:21:47	31.82	58.39	26.83	32.52	115	00:20:15
00:21:48	31.81	58.97	26.83	32.51	114	00:20:16
00:21:49	31.8	59.37	26.84	32.5	113	00:20:17
00:21:50	31.78	60.05	26.84	32.48	112	00:20:18
00:21:51	31.77	60.72	26.84	32.47	111	00:20:19
00:21:52	31.78	61.06	26.85	32.48	111	00:20:20
00:21:53	31.78	61.09	26.86	32.48	111	00:20:21
00:21:54	31.78	60.97	26.86	32.48	111	00:20:22
00:21:55	31.77	61.67	26.87	32.47	111	00:20:23
00:21:56	31.75	62.24	26.87	32.45	111	00:20:24
00:21:57	31.74	62.24	26.88	32.44	110	00:20:25
00:21:58	31.73	61.82	26.88	32.43	110	00:20:26
00:22:00	31.73	61.4	26.88	32.43	109	00:20:27
00:22:01	31.73	60.57	26.88	32.43	108	00:20:28
00:22:02	31.73	60.18	26.89	32.43	108	00:20:29
00:22:03	31.72	59.9	26.88	32.42	108	00:20:30
00:22:04	31.72	59.5	26.88	32.42	107	00:20:31
00:22:05	31.71	59.08	26.89	32.41	108	00:20:32
00:22:06	31.69	58.58	26.89	32.39	109	00:20:33
00:22:07	31.68	58.21	26.9	32.38	110	00:20:34
00:22:08	31.67	57.84	26.9	32.37	111	00:20:35
00:22:09	31.65	57.38	26.9	32.35	111	00:20:36
00:22:10	31.6	56.66	26.9	32.3	111	00:20:37
00:22:11	31.59	56.6	26.91	32.29	111	00:20:38
00:22:12	31.56	57.41	26.92	32.26	111	00:20:39
00:22:14	31.53	57.38	26.93	32.23	111	00:20:40
00:22:15	31.49	57.01	26.92	32.19	110	00:20:41
00:22:16	31.46	56.57	26.92	32.16	110	00:20:42
00:22:17	31.42	56.16	26.92	32.12	110	00:20:43
00:22:18	31.38	56.42	26.92	32.08	110	00:20:44
00:22:19	31.36	56.85	26.93	32.06	109	00:20:45
00:22:20	31.34	57.2	26.94	32.04	110	00:20:46
00:22:21	31.3	57.19	26.94	32	111	00:20:47
00:22:22	31.29	57.23	26.94	31.99	112	00:20:48
00:22:23	31.26	57.82	26.94	31.96	113	00:20:49
00:22:24	31.16	58.69	26.95	31.86	114	00:20:50
00:22:25	31.14	59.43	26.95	31.84	114	00:20:51
00:22:26	31.12	59.95	26.96	31.82	114	00:20:52
00:22:27	31.09	60.77	26.96	31.79	114	00:20:53
00:22:29	31.08	61.32	26.98	31.78	114	00:20:54
00:22:30	31.06	60.89	26.98	31.76	115	00:20:55
00:22:31	31.03	60.38	26.98	31.73	115	00:20:56
00:22:32	30.98	60.87	26.99	31.68	115	00:20:57
00:22:33	30.95	61.99	26.99	31.65	114	00:20:58
00:22:34	30.91	62.9	27	31.61	114	00:20:59
00:22:35	30.88	63.83	27.01	31.58	113	00:21:00
00:22:36	30.86	64.57	27.01	31.56	113	00:21:01
00:22:37	30.83	65.14	27.04	31.53	113	00:21:02
00:22:38	30.8	65.41	27.03	31.5	113	00:21:03
00:22:39	30.74	65.61	27.04	31.44	113	00:21:04
00:22:40	30.71	65.14	27.03	31.41	113	00:21:05
00:22:41	30.67	65.56	27.05	31.37	113	00:21:06
00:22:42	30.64	65.68	27.04	31.34	114	00:21:07
00:22:44	30.61	65.5	27.06	31.31	114	00:21:08
00:22:45	30.59	66.03	27.07	31.29	115	00:21:09
00:22:46	30.58	65.35	27.06	31.28	115	00:21:10
00:22:47	30.57	64.25	27.06	31.27	114	00:21:11
00:22:48	30.55	63.02	27.05	31.25	114	00:21:12
00:22:49	30.52	61.64	27.06	31.22	114	00:21:13
00:22:50	30.49	60.2	27.06	31.19	114	00:21:14
00:22:51	30.45	59.41	27.05	31.15	113	00:21:15
00:22:52	30.41	58.61	27.06	31.11	112	00:21:16
00:22:53	30.37	58.11	27.06	31.07	111	00:21:17
00:22:54	30.34	58.24	27.07	31.04	110	00:21:18
00:22:55	30.32	57.9	27.07	31.02	110	00:21:19
00:22:56	30.31	57.5	27.07	31.01	110	00:21:20
00:22:58	30.3	57.09	27.07	31	112	00:21:21
00:22:59	30.28	57	27.08	30.98	114	00:21:22
00:23:00	30.27	57.15	27.08	30.97	115	00:21:23
00:23:01	30.27	57.16	27.07	30.97	117	00:21:24
00:23:02	30.27	56.94	27.09	30.97	119	00:21:25
00:23:03	30.28	57	27.08	30.98	119	00:21:26
00:23:04	30.28	57.9	27.1	30.98	120	00:21:27
00:23:05	30.28	58.49	27.1	30.98	121	00:21:28
00:23:06	30.26	58.8	27.1	30.96	121	00:21:29
00:23:07	30.26	58.95	27.11	30.96	122	00:21:30
00:23:08	30.25	58.95	27.12	30.95	122	00:21:31
00:23:09	30.26	58.58	27.12	30.96	123	00:21:32
00:23:10	30.28	57.94	27.12	30.98	124	00:21:33
00:23:11	30.27	57.53	27.12	30.97	124	00:21:34
00:23:13	30.27	57.66	27.13	30.97	130	00:21:35
00:23:14	30.27	57.19	27.13	30.97	132	00:21:36
00:23:15	30.26	56.26	27.14	30.96	133	00:21:37
00:23:16	30.24	55.19	27.13	30.94	133	00:21:38
00:23:17	30.23	54.08	27.14	30.93	133	00:21:39
00:23:18	30.21	53.89	27.14	30.91	133	00:21:40
00:23:19	30.2	54.24	27.15	30.9	133	00:21:41
00:23:20	30.17	55.54	27.14	30.87	133	00:21:42
00:23:21	30.16	56.01	27.15	30.86	133	00:21:43
00:23:22	30.14	55.07	27.14	30.84	132	00:21:44
00:23:23	30.1	53.96	27.15	30.8	130	00:21:45
00:23:24	30.08	52.78	27.14	30.78	127	00:21:46
00:23:25	30.06	51.98	27.16	30.76	127	00:21:47
00:23:27	30.04	51.5	27.16	30.74	126	00:21:48
00:23:28	30.04	51.73	27.16	30.74	126	00:21:49
00:23:29	30.02	52.98	27.16	30.72	125	00:21:50
00:23:30	30.03	55.01	27.17	30.73	126	00:21:51
00:23:31	30.03	56.39	27.18	30.73	125	00:21:52
00:23:32	30.04	55.7	27.17	30.74	125	00:21:53
00:23:33	30.03	54.31	27.18	30.73	125	00:21:54
00:23:34	30.03	53.33	27.18	30.73	126	00:21:55
00:23:35	30.01	52.69	27.18	30.71	128	00:21:56
00:23:36	29.99	52.53	27.17	30.69	128	00:21:57
00:23:37	29.98	52.76	27.19	30.68	128	00:21:58
00:23:38	30.01	52.95	27.18	30.71	128	00:21:59
00:23:39	30.02	53.33	27.18	30.72	128	00:22:00
00:23:40	30.04	53.62	27.17	30.74	128	00:22:01
00:23:42	30.04	53.81	27.19	30.74	128	00:22:02
00:23:43	30.04	54.25	27.18	30.74	129	00:22:03
00:23:44	30.04	54.82	27.2	30.74	129	00:22:04
00:23:45	30.05	55.64	27.2	30.75	129	00:22:05
00:23:46	30.05	55.89	27.2	30.75	130	00:22:06
00:23:47	30.05	55.8	27.21	30.75	129	00:22:07
00:23:48	30.04	55.73	27.21	30.74	129	00:22:08
00:23:49	30.03	55.42	27.22	30.73	130	00:22:09
00:23:50	30.03	54.98	27.22	30.73	130	00:22:10
00:23:51	30.03	54.57	27.21	30.73	130	00:22:11
00:23:52	30.02	54.29	27.22	30.72	130	00:22:12
00:23:53	30.01	54.51	27.22	30.71	130	00:22:13
00:23:54	29.98	55.24	27.23	30.68	130	00:22:14
00:23:55	29.96	55.74	27.23	30.66	131	00:22:15
00:23:57	29.96	55.58	27.23	30.66	132	00:22:16
00:23:58	29.96	55.11	27.24	30.66	132	00:22:17
00:23:59	29.95	54.57	27.24	30.65	131	00:22:18
00:24:00	29.95	54.22	27.24	30.65	122	00:22:19
00:24:01	29.93	54.35	27.24	30.63	118	00:22:20
00:24:02	29.92	54.35	27.24	30.62	116	00:22:21
00:24:03	29.88	54.16	27.25	30.58	115	00:22:22
00:24:04	29.87	53.85	27.25	30.57	113	00:22:23
00:24:05	29.84	53.56	27.25	30.54	112	00:22:24
00:24:06	29.82	53.37	27.25	30.52	111	00:22:25
00:24:07	29.82	53.43	27.25	30.52	111	00:22:26
00:24:08	29.83	53.4	27.25	30.53	111	00:22:27
00:24:09	29.85	53.09	27.25	30.55	112	00:22:28
00:24:11	29.86	52.83	27.26	30.56	112	00:22:29
00:24:12	29.83	52.22	27.26	30.53	112	00:22:30
00:24:13	29.8	51.8	27.26	30.5	113	00:22:31
00:24:14	29.78	51.93	27.25	30.48	114	00:22:32
00:24:15	29.74	51.68	27.26	30.44	114	00:22:33
00:24:16	29.72	51.13	27.26	30.42	116	00:22:34
00:24:17	29.71	50.35	27.25	30.41	117	00:22:35
00:24:18	29.69	49.71	27.25	30.39	118	00:22:36
00:24:19	29.65	49.12	27.24	30.35	119	00:22:37
00:24:20	29.6	48.66	27.24	30.3	120	00:22:38
00:24:21	29.54	48.34	27.23	30.24	120	00:22:39
00:24:22	29.42	48.01	27.23	30.12	119	00:22:40
00:24:23	29.39	47.81	27.23	30.09	119	00:22:41
00:24:24	29.36	47.52	27.23	30.06	119	00:22:42
00:24:26	29.33	47.19	27.21	30.03	120	00:22:43
00:24:27	29.33	46.96	27.22	30.03	121	00:22:44
00:24:28	29.31	47.02	27.22	30.01	121	00:22:45
00:24:29	29.29	47.22	27.22	29.99	122	00:22:46
00:24:30	29.26	46.89	27.23	29.96	122	00:22:47
00:24:31	29.23	46.83	27.24	29.93	122	00:22:48
00:24:32	29.19	46.82	27.24	29.89	121	00:22:49
00:24:33	29.16	47.65	27.25	29.86	120	00:22:50
00:24:34	29.13	49.45	27.24	29.83	120	00:22:51
00:24:35	29.1	51.19	27.25	29.8	119	00:22:52
00:24:36	29.1	51.45	27.25	29.8	119	00:22:53
00:24:37	29.1	51.93	27.26	29.8	119	00:22:54
00:24:38	29.09	53.18	27.26	29.79	118	00:22:55
00:24:39	29.08	53.94	27.26	29.78	117	00:22:56
00:24:41	29.08	53.59	27.26	29.78	115	00:22:57
00:24:42	29.07	53.63	27.27	29.77	117	00:22:58
00:24:43	29.07	53.95	27.28	29.77	119	00:22:59
00:24:44	29.07	54.26	27.27	29.77	120	00:23:00
00:24:45	29.08	54.48	27.27	29.78	120	00:23:01
00:24:46	29.07	55.4	27.28	29.77	120	00:23:02
00:24:47	29.07	56.24	27.27	29.77	120	00:23:03
00:24:48	29.07	55.87	27.28	29.77	120	00:23:04
00:24:49	29.07	55.15	27.27	29.77	119	00:23:05
00:24:50	29.07	54.14	27.28	29.77	118	00:23:06
00:24:51	29.08	53.37	27.28	29.78	118	00:23:07
00:24:52	29.08	53.47	27.29	29.78	118	00:23:08
00:24:53	29.08	54.52	27.3	29.78	118	00:23:09
00:24:55	29.07	56.31	27.3	29.77	117	00:23:10
00:24:56	29.07	57.84	27.31	29.77	111	00:23:11
00:24:57	29.07	59.3	27.3	29.77	108	00:23:12
00:24:58	29.07	61.07	27.32	29.77	105	00:23:13
00:24:59	29.07	62.43	27.33	29.77	103	00:23:14
00:25:00	29.09	63.34	27.34	29.79	103	00:23:15
00:25:01	29.08	63.07	27.33	29.78	104	00:23:16
00:25:02	29.08	62.46	27.32	29.78	105	00:23:17
00:25:03	29.09	62.37	27.33	29.79	106	00:23:18
00:25:04	29.08	61.5	27.33	29.78	107	00:23:19
00:25:05	29.06	59.88	27.32	29.76	109	00:23:20
00:25:06	29.07	59.14	27.34	29.77	112	00:23:21
00:25:07	29.06	59.54	27.33	29.76	112	00:23:22
00:25:08	29.06	59.79	27.35	29.76	113	00:23:23
00:25:10	29.06	60.46	27.35	29.76	112	00:23:24
00:25:11	29.05	60.37	27.35	29.75	111	00:23:25
00:25:12	29.04	60.19	27.36	29.74	109	00:23:26
00:25:13	29.03	59.88	27.35	29.73	104	00:23:27
00:25:14	29.03	59.7	27.36	29.73	103	00:23:28
00:25:15	29.03	58.28	27.36	29.73	103	00:23:29
00:25:16	29.03	57.04	27.35	29.73	103	00:23:30
00:25:17	29.03	57.51	27.36	29.73	109	00:23:31
00:25:18	29.03	58.56	27.37	29.73	112	00:23:32
00:25:19	29.03	59.12	27.38	29.73	113	00:23:33
00:25:20	29.04	59.06	27.38	29.74	113	00:23:34
00:25:21	29.04	59.12	27.37	29.74	113	00:23:35
00:25:22	29.03	59.12	27.38	29.73	111	00:23:36
00:25:24	29.02	59.24	27.38	29.72	107	00:23:37
00:25:25	29	59.83	27.39	29.7	106	00:23:38
00:25:26	28.98	60.38	27.4	29.68	106	00:23:39
00:25:27	28.97	60.81	27.39	29.67	105	00:23:40
00:25:28	28.96	60.63	27.4	29.66	106	00:23:41
00:25:29	28.95	60.56	27.4	29.65	108	00:23:42
00:25:30	28.94	60.53	27.4	29.64	109	00:23:43
00:25:31	28.93	60.63	27.42	29.63	109	00:23:44
00:25:32	28.91	60.63	27.41	29.61	108	00:23:45
00:25:33	28.9	60.26	27.41	29.6	107	00:23:46
00:25:34	28.89	59.74	27.42	29.59	106	00:23:47
00:25:35	28.87	58.91	27.41	29.57	107	00:23:48
00:25:36	28.88	57.76	27.42	29.58	108	00:23:49
00:25:37	28.87	56.92	27.42	29.57	109	00:23:50
00:25:39	28.85	57.17	27.44	29.55	109	00:23:51
00:25:40	28.84	57.89	27.43	29.54	110	00:23:52
00:25:41	28.83	58.11	27.43	29.53	111	00:23:53
00:25:42	28.82	57.49	27.43	29.52	112	00:23:54
00:25:43	28.81	57.67	27.44	29.51	113	00:23:55
00:25:44	28.81	58.95	27.44	29.51	114	00:23:56
00:25:45	28.8	59.31	27.45	29.5	114	00:23:57
00:25:46	28.81	59.1	27.45	29.51	114	00:23:58
00:25:47	28.81	59.32	27.45	29.51	115	00:23:59
00:25:48	28.81	59.99	27.46	29.51	117	00:24:00
00:25:49	28.8	60.27	27.47	29.5	117	00:24:01
00:25:50	28.79	59.69	27.46	29.49	116	00:24:02
00:25:51	28.78	59.35	27.46	29.48	116	00:24:03
00:25:52	28.77	59.9	27.48	29.47	116	00:24:04
00:25:54	28.77	60.27	27.48	29.47	115	00:24:05
00:25:55	28.77	60.3	27.48	29.47	115	00:24:06
00:25:56	28.78	60.67	27.5	29.48	114	00:24:07
00:25:57	28.79	60.67	27.49	29.49	115	00:24:08
00:25:58	28.8	61.22	27.51	29.5	113	00:24:09
00:25:59	28.8	62.19	27.51	29.5	114	00:24:10
00:26:00	28.81	62.95	27.52	29.51	114	00:24:11
00:26:01	28.81	62.4	27.5	29.51	114	00:24:12
00:26:02	28.82	60.89	27.5	29.52	114	00:24:13
00:26:03	28.83	59.6	27.5	29.53	114	00:24:14
00:26:04	28.83	58.98	27.51	29.53	114	00:24:15
00:26:05	28.82	59.45	27.5	29.52	113	00:24:16
00:26:06	28.81	59.32	27.51	29.51	113	00:24:17
00:26:08	28.8	59.26	27.52	29.5	113	00:24:18
00:26:09	28.8	60.16	27.52	29.5	113	00:24:19
00:26:10	28.8	61.29	27.53	29.5	112	00:24:20
00:26:11	28.81	61.44	27.54	29.51	113	00:24:21
00:26:12	28.82	61.23	27.56	29.52	114	00:24:22
00:26:13	28.83	60.53	27.55	29.53	114	00:24:23
00:26:14	28.84	59.76	27.54	29.54	114	00:24:24
00:26:15	28.84	59.73	27.54	29.54	114	00:24:25
00:26:16	28.84	59.91	27.55	29.54	114	00:24:26
00:26:17	28.84	59.94	27.56	29.54	114	00:24:27
00:26:18	28.84	59.27	27.56	29.54	114	00:24:28
00:26:19	28.83	57.91	27.56	29.53	114	00:24:29
00:26:20	28.83	57.91	27.56	29.53	114	00:24:30
00:26:21	28.81	57.44	27.56	29.51	114	00:24:31
00:26:23	28.8	56.38	27.56	29.5	113	00:24:32
00:26:24	28.8	56.38	27.56	29.5	113	00:24:33
00:26:25	28.79	55.47	27.56	29.49	113	00:24:34
00:26:26	28.78	54.62	27.56	29.48	112	00:24:35
00:26:27	28.78	53.67	27.56	29.48	112	00:24:36
00:26:28	28.78	53.35	27.57	29.48	111	00:24:37
00:26:29	28.77	53.35	27.56	29.47	111	00:24:38
00:26:30	28.76	54.43	27.58	29.46	112	00:24:39
00:26:31	28.75	54.56	27.58	29.45	112	00:24:40
00:26:32	28.74	53.7	27.58	29.44	113	00:24:41
00:26:33	28.73	52.55	27.56	29.43	114	00:24:42
00:26:34	28.74	51.49	27.57	29.44	114	00:24:43
00:26:35	28.75	50.56	27.57	29.45	115	00:24:44
00:26:37	28.76	49.94	27.57	29.46	117	00:24:45
00:26:38	28.77	49.42	27.56	29.47	117	00:24:46
00:26:39	28.76	48.96	27.55	29.46	118	00:24:47
00:26:40	28.75	48.51	27.56	29.45	119	00:24:48
00:26:41	28.74	48.08	27.56	29.44	119	00:24:49
00:26:42	28.73	47.65	27.55	29.43	120	00:24:50
00:26:43	28.73	47.36	27.54	29.43	121	00:24:51
00:26:44	28.72	47.13	27.54	29.42	121	00:24:52
00:26:45	28.72	46.93	27.54	29.42	122	00:24:53
00:26:46	28.71	46.99	27.55	29.41	123	00:24:54
00:26:47	28.7	46.9	27.55	29.4	123	00:24:55
00:26:48	28.68	46.66	27.54	29.38	124	00:24:56
00:26:49	28.65	46.63	27.53	29.35	125	00:24:57
00:26:50	28.64	46.63	27.53	29.34	125	00:24:58
00:26:52	28.6	46.66	27.53	29.3	125	00:24:59
00:26:53	28.56	46.6	27.53	29.26	125	00:25:00
00:26:54	28.52	46.53	27.53	29.22	125	00:25:01
00:26:55	28.5	46.27	27.54	29.2	125	00:25:02
00:26:56	28.46	46.1	27.52	29.16	124	00:25:03
00:26:57	28.45	46.34	27.54	29.15	122	00:25:04
00:26:58	28.44	47.29	27.54	29.14	121	00:25:05
00:26:59	28.44	49.03	27.55	29.14	122	00:25:06
00:27:00	28.43	49.55	27.54	29.13	123	00:25:07
00:27:01	28.43	49.39	27.53	29.13	124	00:25:08
00:27:02	28.42	49.06	27.53	29.12	125	00:25:09
00:27:03	28.4	48.44	27.54	29.1	125	00:25:10
00:27:04	28.39	48.11	27.55	29.09	125	00:25:11
00:27:05	28.37	47.82	27.53	29.07	125	00:25:12
00:27:07	28.34	47.32	27.54	29.04	125	00:25:13
00:27:08	28.3	46.8	27.54	29	124	00:25:14
00:27:09	28.27	46.47	27.54	28.97	125	00:25:15
00:27:10	28.24	46.33	27.52	28.94	125	00:25:16
00:27:11	28.21	46.46	27.52	28.91	124	00:25:17
00:27:12	28.19	46.6	27.52	28.89	125	00:25:18
00:27:13	28.18	47.29	27.53	28.88	125	00:25:19
00:27:14	28.17	48.5	27.54	28.87	125	00:25:20
00:27:15	28.12	49.74	27.54	28.82	124	00:25:21
00:27:16	28.09	49.97	27.54	28.79	122	00:25:22
00:27:17	27.98	49.71	27.55	28.68	118	00:25:23
00:27:18	27.92	50.62	27.55	28.62	117	00:25:24
00:27:19	27.9	52.07	27.56	28.6	117	00:25:25
00:27:21	27.83	53.38	27.55	28.53	117	00:25:26
00:27:22	27.79	54.18	27.56	28.49	118	00:25:27
00:27:23	27.75	54.94	27.56	28.45	118	00:25:28
00:27:24	27.71	55.53	27.56	28.41	118	00:25:29
00:27:25	27.66	56.16	27.57	28.36	118	00:25:30
00:27:26	27.65	56.76	27.56	28.35	118	00:25:31
00:27:27	27.64	57.54	27.57	28.34	118	00:25:32
00:27:28	27.63	58.35	27.58	28.33	118	00:25:33
00:27:29	27.61	58.93	27.58	28.31	118	00:25:34
00:27:30	27.6	59.33	27.59	28.3	118	00:25:35
00:27:31	27.59	59.86	27.59	28.29	118	00:25:36
00:27:32	27.61	60.29	27.59	28.31	118	00:25:37
00:27:33	27.63	60.75	27.6	28.33	118	00:25:38
00:27:34	27.64	61.36	27.6	28.34	118	00:25:39
00:27:36	27.63	62.06	27.6	28.33	118	00:25:40
00:27:37	27.6	62.42	27.61	28.3	119	00:25:41
00:27:38	27.56	62.51	27.63	28.26	120	00:25:42
00:27:39	27.54	63.03	27.62	28.24	121	00:25:43
00:27:40	27.51	63.11	27.61	28.21	122	00:25:44
00:27:41	27.49	62.91	27.62	28.19	122	00:25:45
00:27:42	27.46	62.33	27.63	28.16	122	00:25:46
00:27:43	27.43	62	27.62	28.13	122	00:25:47
00:27:44	27.4	61.66	27.62	28.1	122	00:25:48
00:27:45	27.36	61.48	27.63	28.06	113	00:25:49
00:27:46	27.32	61.7	27.63	28.02	110	00:25:50
00:27:47	27.31	62.52	27.64	28.01	109	00:25:51
00:27:48	27.32	63	27.63	28.02	109	00:25:52
00:27:49	27.33	63.27	27.63	28.03	109	00:25:53
00:27:51	27.34	63.21	27.64	28.04	110	00:25:54
00:27:52	27.34	63.33	27.64	28.04	111	00:25:55
00:27:53	27.33	63.51	27.66	28.03	109	00:25:56
00:27:54	27.31	63.69	27.66	28.01	108	00:25:57
00:27:55	27.27	63.93	27.66	27.97	107	00:25:58
00:27:56	27.24	64.32	27.66	27.94	106	00:25:59
00:27:57	27.21	64.05	27.67	27.91	106	00:26:00
00:27:58	27.18	63.87	27.66	27.88	106	00:26:01
00:27:59	27.15	63.99	27.67	27.85	107	00:26:02
00:28:00	27.14	64.29	27.67	27.84	109	00:26:03
00:28:01	27.11	64.56	27.68	27.81	109	00:26:04
00:28:02	27.11	64.38	27.67	27.81	109	00:26:05
00:28:03	27.12	63.96	27.68	27.82	108	00:26:06
00:28:05	27.11	62.16	27.68	27.81	108	00:26:07
00:28:06	27.11	59.9	27.66	27.81	108	00:26:08
00:28:07	27.11	57.77	27.65	27.81	107	00:26:09
00:28:08	27.11	55.61	27.65	27.81	107	00:26:10
00:28:09	27.08	53.87	27.64	27.78	107	00:26:11
00:28:10	27.07	52.4	27.64	27.77	107	00:26:12
00:28:11	27.06	51.18	27.62	27.76	103	00:26:13
00:28:12	27.05	50.27	27.63	27.75	102	00:26:14
00:28:13	27.04	49.69	27.62	27.74	101	00:26:15
00:28:14	27.04	49.43	27.62	27.74	103	00:26:16
00:28:15	27.04	49.62	27.62	27.74	104	00:26:17
00:28:16	27.04	49.59	27.62	27.74	105	00:26:18
00:28:17	27.04	49.13	27.61	27.74	107	00:26:19
00:28:18	27.04	48.71	27.62	27.74	107	00:26:20
00:28:20	27.04	48.22	27.6	27.74	105	00:26:21
00:28:21	27.04	48.09	27.6	27.74	105	00:26:22
00:28:22	27.05	47.63	27.6	27.75	105	00:26:23
00:28:23	27.05	47.36	27.6	27.75	105	00:26:24
00:28:24	27.05	47	27.59	27.75	103	00:26:25
00:28:25	27.05	46.64	27.59	27.75	101	00:26:26
00:28:26	27.06	46.27	27.58	27.76	99	00:26:27
00:28:27	27.05	45.97	27.57	27.75	99	00:26:28
00:28:28	27.04	45.68	27.57	27.74	100	00:26:29
00:28:29	27.04	45.41	27.56	27.74	103	00:26:30
00:28:30	27	45.34	27.56	27.7	106	00:26:31
00:28:31	26.97	45.31	27.56	27.67	108	00:26:32
00:28:32	26.95	45.21	27.55	27.65	108	00:26:33
00:28:34	26.93	45.21	27.56	27.63	108	00:26:34
00:28:35	26.91	45.11	27.54	27.61	107	00:26:35
00:28:36	26.89	44.97	27.53	27.59	108	00:26:36
00:28:37	26.88	44.81	27.53	27.58	109	00:26:37
00:28:38	26.88	44.74	27.52	27.58	110	00:26:38
00:28:39	26.88	44.7	27.52	27.58	108	00:26:39
00:28:40	26.88	44.64	27.52	27.58	106	00:26:40
00:28:41	26.88	44.47	27.52	27.58	104	00:26:41
00:28:42	26.88	44.27	27.51	27.58	103	00:26:42
00:28:43	26.88	44.07	27.5	27.58	102	00:26:43
00:28:44	26.88	43.84	27.5	27.58	102	00:26:44
00:28:45	26.82	43.67	27.5	27.52	101	00:26:45
00:28:46	26.8	44.04	27.5	27.5	101	00:26:46
00:28:47	26.79	44.24	27.52	27.49	101	00:26:47
00:28:49	26.78	44.24	27.51	27.48	102	00:26:48
00:28:50	26.8	44.6	27.51	27.5	102	00:26:49
00:28:51	26.8	45.64	27.51	27.5	101	00:26:50
00:28:52	26.8	46.96	27.51	27.5	102	00:26:51
00:28:53	26.81	48.11	27.51	27.51	102	00:26:52
00:28:54	26.81	47.91	27.5	27.51	102	00:26:53
00:28:55	26.81	48.04	27.5	27.51	103	00:26:54
00:28:56	26.81	48.3	27.5	27.51	103	00:26:55
00:28:57	26.8	48.56	27.5	27.5	103	00:26:56
00:28:58	26.79	48.6	27.5	27.49	103	00:26:57
00:28:59	26.81	48.47	27.48	27.51	104	00:26:58
00:29:00	26.82	48.96	27.49	27.52	105	00:26:59
00:29:01	26.83	50.61	27.51	27.53	105	00:27:00
00:29:02	26.84	52.42	27.5	27.54	105	00:27:01
00:29:04	26.85	53.34	27.5	27.55	106	00:27:02
00:29:05	26.86	53.88	27.51	27.56	106	00:27:03
00:29:06	26.87	54.23	27.51	27.57	106	00:27:04
00:29:07	26.89	54.71	27.5	27.59	107	00:27:05
00:29:08	26.91	54.83	27.52	27.61	107	00:27:06
00:29:09	26.93	53.63	27.52	27.63	109	00:27:07
00:29:10	26.95	52.67	27.51	27.65	110	00:27:08
00:29:11	26.97	51.71	27.5	27.67	111	00:27:09
00:29:12	27	52.25	27.51	27.7	112	00:27:10
00:29:13	27.02	52.32	27.5	27.72	112	00:27:11
00:29:14	27.03	51.61	27.51	27.73	112	00:27:12
00:29:15	27.04	52	27.5	27.74	111	00:27:13
00:29:16	27.04	52.42	27.49	27.74	111	00:27:14
00:29:18	27.03	52.86	27.51	27.73	110	00:27:15
00:29:19	27.04	52.86	27.5	27.74	109	00:27:16
00:29:20	27.05	53.4	27.49	27.75	109	00:27:17
00:29:21	27.05	53.91	27.51	27.75	108	00:27:18
00:29:22	27.06	54.71	27.51	27.76	106	00:27:19
00:29:23	27.08	54.55	27.51	27.78	106	00:27:20
00:29:24	27.09	54.45	27.5	27.79	107	00:27:21
00:29:25	27.1	54.39	27.51	27.8	107	00:27:22
00:29:26	27.11	54.04	27.5	27.81	109	00:27:23
00:29:27	27.12	53.91	27.5	27.82	110	00:27:24
00:29:28	27.13	55.05	27.51	27.83	111	00:27:25
00:29:29	27.15	56.28	27.5	27.85	112	00:27:26
00:29:30	27.15	56.62	27.51	27.85	114	00:27:27
00:29:31	27.15	55.5	27.52	27.85	115	00:27:28
00:29:33	27.16	54.48	27.51	27.86	115	00:27:29
00:29:34	27.16	54.2	27.51	27.86	116	00:27:30
00:29:35	27.17	54.42	27.52	27.87	117	00:27:31
00:29:36	27.18	54.68	27.52	27.88	117	00:27:32
00:29:37	27.19	54.42	27.51	27.89	118	00:27:33
00:29:38	27.2	53.98	27.5	27.9	118	00:27:34
00:29:39	27.22	54.71	27.52	27.92	118	00:27:35
00:29:40	27.24	55.28	27.52	27.94	119	00:27:36
00:29:41	27.26	56.28	27.52	27.96	120	00:27:37
00:29:42	27.27	56.97	27.52	27.97	120	00:27:38
00:29:43	27.27	57.44	27.52	27.97	120	00:27:39
00:29:44	27.27	57.47	27.53	27.97	120	00:27:40
00:29:45	27.28	57.44	27.53	27.98	120	00:27:41
00:29:47	27.29	56.91	27.53	27.99	120	00:27:42
00:29:48	27.31	57.34	27.54	28.01	120	00:27:43
00:29:49	27.33	57.93	27.52	28.03	119	00:27:44
00:29:50	27.33	57.75	27.54	28.03	119	00:27:45
00:29:51	27.33	56.78	27.51	28.03	119	00:27:46
00:29:52	27.34	55.15	27.52	28.04	121	00:27:47
00:29:53	27.34	53.91	27.52	28.04	120	00:27:48
00:29:54	27.34	52.58	27.52	28.04	120	00:27:49
00:29:55	27.35	51.9	27.52	28.05	120	00:27:50
00:29:56	27.37	52.42	27.51	28.07	120	00:27:51
00:29:57	27.37	52.06	27.51	28.07	120	00:27:52
00:29:58	27.37	51.45	27.52	28.07	120	00:27:53
00:29:59	27.36	51.1	27.52	28.06	120	00:27:54
00:30:00	27.35	51.55	27.52	28.05	119	00:27:55
00:30:02	27.34	51.97	27.51	28.04	119	00:27:56
00:30:03	27.34	52.23	27.52	28.04	119	00:27:57
00:30:04	27.34	51.87	27.52	28.04	119	00:27:58
00:30:05	27.35	50.71	27.51	28.05	118	00:27:59
00:30:06	27.36	49.41	27.5	28.06	116	00:28:00
00:30:07	27.39	49.93	27.51	28.09	115	00:28:01
00:30:08	27.41	52.16	27.52	28.11	115	00:28:02
00:30:09	27.41	54.49	27.52	28.11	115	00:28:03
00:30:10	27.4	55.84	27.52	28.1	115	00:28:04
00:30:11	27.39	56.82	27.53	28.09	114	00:28:05
00:30:12	27.38	57.5	27.53	28.08	114	00:28:06
00:30:13	27.39	57.16	27.54	28.09	113	00:28:07
00:30:14	27.41	56.78	27.54	28.11	113	00:28:08
00:30:15	27.42	56.13	27.54	28.12	112	00:28:09
00:30:17	27.42	54.93	27.54	28.12	112	00:28:10
00:30:18	27.43	54.27	27.53	28.13	112	00:28:11
00:30:19	27.43	53.79	27.54	28.13	112	00:28:12
00:30:20	27.43	53.76	27.54	28.13	112	00:28:13
00:30:21	27.44	54.14	27.54	28.14	112	00:28:14
00:30:22	27.45	55.34	27.54	28.15	113	00:28:15
00:30:23	27.47	55.22	27.55	28.17	113	00:28:16
00:30:24	27.48	55.15	27.54	28.18	114	00:28:17
00:30:25	27.48	55.47	27.55	28.18	115	00:28:18
00:30:26	27.48	56.38	27.57	28.18	115	00:28:19
00:30:27	27.47	57.29	27.57	28.17	115	00:28:20
00:30:28	27.44	57.97	27.56	28.14	115	00:28:21
00:30:29	27.45	58.75	27.56	28.15	115	00:28:22
00:30:31	27.46	59.36	27.57	28.16	115	00:28:23
00:30:32	27.48	59.95	27.58	28.18	115	00:28:24
00:30:33	27.49	60.44	27.58	28.19	113	00:28:25
00:30:34	27.5	60.07	27.58	28.2	111	00:28:26
00:30:35	27.5	59.36	27.57	28.2	111	00:28:27
00:30:36	27.51	59.03	27.58	28.21	111	00:28:28
00:30:37	27.51	58.96	27.58	28.21	113	00:28:29
00:30:38	27.53	57.73	27.59	28.23	114	00:28:30
00:30:39	27.55	56.23	27.58	28.25	114	00:28:31
00:30:40	27.57	55.69	27.57	28.27	114	00:28:32
00:30:41	27.58	56.67	27.58	28.28	114	00:28:33
00:30:42	27.59	57.48	27.59	28.29	114	00:28:34
00:30:43	27.6	57.51	27.6	28.3	114	00:28:35
00:30:44	27.6	58.16	27.58	28.3	114	00:28:36
00:30:46	27.62	59.03	27.6	28.32	112	00:28:37
00:30:47	27.63	59.43	27.6	28.33	109	00:28:38
00:30:48	27.64	59.43	27.62	28.34	104	00:28:39
00:30:49	27.64	58.6	27.6	28.34	102	00:28:40
00:30:50	27.63	58.32	27.61	28.33	102	00:28:41
00:30:51	27.62	58.51	27.6	28.32	101	00:28:42
00:30:52	27.62	59.37	27.62	28.32	100	00:28:43
00:30:53	27.61	60.48	27.62	28.31	99	00:28:44
00:30:54	27.6	61.42	27.64	28.3	100	00:28:45
00:30:55	27.6	61.48	27.64	28.3	101	00:28:46
00:30:56	27.6	61.64	27.63	28.3	101	00:28:47
00:30:57	27.62	61.79	27.64	28.32	102	00:28:48
00:30:58	27.65	61.82	27.64	28.35	103	00:28:49
00:31:00	27.66	62.21	27.65	28.36	103	00:28:50
00:31:01	27.67	61.82	27.65	28.37	103	00:28:51
00:31:02	27.66	61.64	27.66	28.36	104	00:28:52
00:31:03	27.66	61.76	27.66	28.36	105	00:28:53
00:31:04	27.64	61.46	27.65	28.34	104	00:28:54
00:31:05	27.64	61.09	27.65	28.34	106	00:28:55
00:31:06	27.63	61.85	27.66	28.33	106	00:28:56
00:31:07	27.63	62.82	27.68	28.33	109	00:28:57
00:31:08	27.62	63.18	27.68	28.32	111	00:28:58
00:31:09	27.62	62.95	27.68	28.32	112	00:28:59
00:31:10	27.64	63.52	27.68	28.34	113	00:29:00
00:31:11	27.65	63.76	27.69	28.35	114	00:29:01
00:31:12	27.67	63.61	27.69	28.37	114	00:29:02
00:31:13	27.67	63.94	27.69	28.37	114	00:29:03
00:31:15	27.66	64.57	27.7	28.36	114	00:29:04
00:31:16	27.65	64.57	27.7	28.35	115	00:29:05
00:31:17	27.65	63.34	27.68	28.35	116	00:29:06
00:31:18	27.68	62.62	27.69	28.38	116	00:29:07
00:31:19	27.7	62.49	27.7	28.4	116	00:29:08
00:31:20	27.71	62.62	27.71	28.41	116	00:29:09
00:31:21	27.71	62.44	27.7	28.41	116	00:29:10
00:31:22	27.71	62.65	27.71	28.41	116	00:29:11
00:31:23	27.7	63.04	27.72	28.4	115	00:29:12
00:31:24	27.72	63.28	27.71	28.42	114	00:29:13
00:31:25	27.72	63.13	27.73	28.42	111	00:29:14
00:31:26	27.74	63.07	27.74	28.44	109	00:29:15
00:31:27	27.8	62.89	27.73	28.5	109	00:29:16
00:31:28	27.81	63.01	27.73	28.51	108	00:29:17
00:31:30	27.84	63.61	27.74	28.54	109	00:29:18
00:31:31	27.86	62.62	27.74	28.56	109	00:29:19
00:31:32	27.87	62.32	27.75	28.57	109	00:29:20
00:31:33	27.88	62.38	27.74	28.58	109	00:29:21
00:31:34	27.89	61.17	27.74	28.59	110	00:29:22
00:31:35	27.89	58.83	27.75	28.59	111	00:29:23
00:31:36	27.9	57.47	27.74	28.6	112	00:29:24
00:31:37	27.89	57.28	27.75	28.59	113	00:29:25
00:31:38	27.87	57.41	27.75	28.57	114	00:29:26
00:31:39	27.84	56.5	27.74	28.54	114	00:29:27
00:31:40	27.82	54.8	27.73	28.52	114	00:29:28
00:31:41	27.77	52.99	27.73	28.47	113	00:29:29
00:31:42	27.77	51.96	27.72	28.47	112	00:29:30
00:31:44	27.77	51.32	27.73	28.47	113	00:29:31
00:31:45	27.78	50.74	27.72	28.48	113	00:29:32
00:31:46	27.8	49.99	27.72	28.5	113	00:29:33
00:31:47	27.81	49.31	27.71	28.51	114	00:29:34
00:31:48	27.79	48.75	27.7	28.49	115	00:29:35
00:31:49	27.76	48.13	27.69	28.46	116	00:29:36
00:31:50	27.74	47.6	27.69	28.44	116	00:29:37
00:31:51	27.71	47.14	27.68	28.41	115	00:29:38
00:31:52	27.69	46.62	27.66	28.39	113	00:29:39
00:31:53	27.69	46.22	27.67	28.39	111	00:29:40
00:31:54	27.68	45.89	27.66	28.38	110	00:29:41
00:31:55	27.65	45.69	27.66	28.35	110	00:29:42
00:31:56	27.59	45.65	27.65	28.29	110	00:29:43
00:31:57	27.56	45.65	27.64	28.26	110	00:29:44
00:31:59	27.54	45.58	27.64	28.24	110	00:29:45
00:32:00	27.53	45.52	27.64	28.23	111	00:29:46
00:32:01	27.52	45.28	27.63	28.22	112	00:29:47
00:32:02	27.51	45.22	27.62	28.21	112	00:29:48
00:32:03	27.51	45.32	27.64	28.21	112	00:29:49
00:32:04	27.5	45.45	27.62	28.2	112	00:29:50
00:32:05	27.5	45.68	27.62	28.2	112	00:29:51
00:32:06	27.5	45.75	27.62	28.2	113	00:29:52
00:32:07	27.5	45.75	27.62	28.2	114	00:29:53
00:32:08	27.5	45.95	27.61	28.2	115	00:29:54
00:32:09	27.5	46.01	27.61	28.2	115	00:29:55
00:32:10	27.5	46.04	27.61	28.2	116	00:29:56
00:32:11	27.5	46.01	27.61	28.2	116	00:29:57
00:32:12	27.5	45.91	27.6	28.2	117	00:29:58
00:32:14	27.5	45.61	27.59	28.2	117	00:29:59
00:32:15	27.5	45.38	27.58	28.2	117	00:30:00
00:32:16	27.5	45.38	27.58	28.2	117	00:30:01
00:32:17	27.49	45.41	27.58	28.19	116	00:30:02
00:32:18	27.47	45.38	27.57	28.17	115	00:30:03
00:32:19	27.45	45.11	27.56	28.15	112	00:30:04
00:32:20	27.44	45.01	27.55	28.14	112	00:30:05
00:32:21	27.41	44.81	27.56	28.11	112	00:30:06
00:32:22	27.39	44.74	27.55	28.09	112	00:30:07
00:32:23	27.34	44.54	27.54	28.04	110	00:30:08
00:32:24	27.31	44.37	27.54	28.01	111	00:30:09
00:32:25	27.24	44.17	27.53	27.94	110	00:30:10
00:32:26	27.21	44	27.52	27.91	110	00:30:11
00:32:28	27.2	44.04	27.52	27.9	111	00:30:12
00:32:29	27.19	44.44	27.52	27.89	110	00:30:13
00:32:30	27.18	44.54	27.52	27.88	110	00:30:14
00:32:31	27.18	44.34	27.51	27.88	110	00:30:15
00:32:32	27.15	44.2	27.5	27.85	110	00:30:16
00:32:33	27.13	44.14	27.5	27.83	110	00:30:17
00:32:34	27.12	44.07	27.48	27.82	110	00:30:18
00:32:35	27.1	43.87	27.49	27.8	110	00:30:19
00:32:36	27.06	43.7	27.48	27.76	111	00:30:20
00:32:37	27.04	43.53	27.47	27.74	113	00:30:21
00:32:38	27	43.49	27.47	27.7	115	00:30:22
00:32:39	26.97	43.46	27.46	27.67	118	00:30:23
00:32:40	26.95	43.59	27.44	27.65	120	00:30:24
00:32:41	26.94	43.63	27.44	27.64	123	00:30:25
00:32:43	26.94	43.59	27.43	27.64	124	00:30:26
00:32:44	26.93	43.66	27.42	27.63	124	00:30:27
00:32:45	26.93	43.59	27.41	27.63	125	00:30:28
00:32:46	26.91	43.46	27.41	27.61	127	00:30:29
00:32:47	26.92	43.35	27.4	27.62	129	00:30:30
00:32:48	26.92	43.25	27.4	27.62	130	00:30:31
00:32:49	26.92	43.35	27.38	27.62	130	00:30:32
00:32:50	26.91	43.32	27.38	27.61	131	00:30:33
00:32:51	26.91	43.11	27.38	27.61	131	00:30:34
00:32:52	26.9	43.01	27.36	27.6	131	00:30:35
00:32:53	26.89	43.25	27.36	27.59	131	00:30:36
00:32:54	26.88	43.35	27.35	27.58	131	00:30:37
00:32:55	26.88	43.58	27.36	27.58	131	00:30:38
00:32:56	26.87	43.78	27.36	27.57	131	00:30:39
00:32:58	26.87	43.72	27.36	27.57	131	00:30:40
00:32:59	26.88	43.65	27.35	27.58	131	00:30:41
00:33:00	26.89	43.31	27.34	27.59	131	00:30:42
00:33:01	26.88	43.41	27.33	27.58	132	00:30:43
00:33:02	26.89	43.51	27.33	27.59	133	00:30:44
00:33:03	26.89	44.12	27.32	27.59	135	00:30:45
00:33:04	26.89	45.91	27.34	27.59	138	00:30:46
00:33:05	26.87	47.99	27.33	27.57	140	00:30:47
00:33:06	26.87	49.39	27.33	27.57	140	00:30:48
00:33:07	26.85	50.37	27.32	27.55	135	00:30:49
00:33:08	26.83	51.3	27.33	27.53	123	00:30:50
00:33:09	26.85	52.43	27.35	27.55	120	00:30:51
00:33:10	26.86	53	27.34	27.56	118	00:30:52
00:33:12	26.88	52.75	27.34	27.58	117	00:30:53
00:33:13	26.9	53.38	27.34	27.6	117	00:30:54
00:33:14	26.92	52.65	27.34	27.62	116	00:30:55
00:33:15	26.95	51.43	27.32	27.65	116	00:30:56
00:33:16	26.96	50.01	27.31	27.66	117	00:30:57
00:33:17	26.97	48.9	27.31	27.67	118	00:30:58
00:33:18	26.97	47.82	27.3	27.67	118	00:30:59
00:33:19	26.96	46.77	27.29	27.66	118	00:31:00
00:33:20	26.94	46.04	27.28	27.64	116	00:31:01
00:33:21	26.91	45.44	27.27	27.61	115	00:31:02
00:33:22	26.88	44.98	27.27	27.58	113	00:31:03
00:33:23	26.79	44.57	27.27	27.49	114	00:31:04
00:33:24	26.74	44.17	27.24	27.44	114	00:31:05
00:33:25	26.71	43.94	27.24	27.41	113	00:31:06
00:33:27	26.66	43.87	27.23	27.36	114	00:31:07
00:33:28	26.64	43.87	27.22	27.34	113	00:31:08
00:33:29	26.61	43.9	27.22	27.31	113	00:31:09
00:33:30	26.59	44	27.21	27.29	114	00:31:10
00:33:31	26.58	44.1	27.21	27.28	110	00:31:11
00:33:32	26.58	44.3	27.2	27.28	107	00:31:12
00:33:33	26.58	44.44	27.2	27.28	106	00:31:13
00:33:34	26.59	44.73	27.2	27.29	107	00:31:14
00:33:35	26.6	44.74	27.19	27.3	110	00:31:15
00:33:36	26.62	44.73	27.19	27.32	113	00:31:16
00:33:37	26.64	44.53	27.18	27.34	115	00:31:17
00:33:38	26.66	44.36	27.17	27.36	115	00:31:18
00:33:39	26.67	44.43	27.15	27.37	113	00:31:19
00:33:41	26.67	44.5	27.16	27.37	111	00:31:20
00:33:42	26.69	44.5	27.16	27.39	110	00:31:21
00:33:43	26.69	44.6	27.16	27.39	111	00:31:22
00:33:44	26.7	44.36	27.15	27.4	111	00:31:23
00:33:45	26.7	44.09	27.14	27.4	111	00:31:24
00:33:46	26.7	43.99	27.14	27.4	110	00:31:25
00:33:47	26.7	44.03	27.13	27.4	109	00:31:26
00:33:48	26.72	44.09	27.13	27.42	110	00:31:27
00:33:49	26.72	44.09	27.12	27.42	110	00:31:28
00:33:50	26.73	43.89	27.11	27.43	109	00:31:29
00:33:51	26.75	43.82	27.11	27.45	110	00:31:30
00:33:52	26.75	43.99	27.11	27.45	110	00:31:31
00:33:53	26.71	43.76	27.1	27.41	111	00:31:32
00:33:54	26.66	43.42	27.09	27.36	111	00:31:33
00:33:56	26.6	43.15	27.09	27.3	110	00:31:34
00:33:57	26.55	43.02	27.08	27.25	109	00:31:35
00:33:58	26.51	43.75	27.08	27.21	106	00:31:36
00:33:59	26.46	45.68	27.09	27.16	106	00:31:37
00:34:00	26.43	49.62	27.09	27.13	106	00:31:38
00:34:01	26.4	52.29	27.1	27.1	106	00:31:39
00:34:02	26.37	54.27	27.1	27.07	106	00:31:40
00:34:03	26.35	55.37	27.09	27.05	106	00:31:41
00:34:04	26.35	55.56	27.1	27.05	104	00:31:42
00:34:05	26.35	54.21	27.09	27.05	101	00:31:43
00:34:06	26.36	53.22	27.09	27.06	97	00:31:44
00:34:07	26.37	52.78	27.09	27.07	96	00:31:45
00:34:08	26.37	51.88	27.09	27.07	97	00:31:46
00:34:09	26.37	50.98	27.09	27.07	98	00:31:47
00:34:11	26.36	50.59	27.09	27.06	99	00:31:48
00:34:12	26.34	50.98	27.1	27.04	100	00:31:49
00:34:13	26.31	51.4	27.09	27.01	100	00:31:50
00:34:14	26.27	51.49	27.11	26.97	100	00:31:51
00:34:15	26.24	51.88	27.09	26.94	101	00:31:52
00:34:16	26.22	52.27	27.09	26.92	100	00:31:53
00:34:17	26.22	52.55	27.1	26.92	98	00:31:54
00:34:18	26.24	53.22	27.1	26.94	97	00:31:55
00:34:19	26.27	53.89	27.09	26.97	95	00:31:56
00:34:20	26.27	54.74	27.1	26.97	94	00:31:57
00:34:21	26.25	55.34	27.11	26.95	95	00:31:58
00:34:22	26.19	55.53	27.1	26.89	97	00:31:59
00:34:23	26.14	55.66	27.1	26.84	97	00:32:00
00:34:25	26.09	55.69	27.1	26.79	98	00:32:01
00:34:26	26.05	55.44	27.11	26.75	99	00:32:02
00:34:27	25.99	55.03	27.11	26.69	100	00:32:03
00:34:28	25.93	54.49	27.1	26.63	102	00:32:04
00:34:29	25.87	54.46	27.11	26.57	103	00:32:05
00:34:30	25.82	54.97	27.1	26.52	104	00:32:06
00:34:31	25.76	55.25	27.1	26.46	105	00:32:07
00:34:32	25.7	54.9	27.1	26.4	106	00:32:08
00:34:33	25.68	54.24	27.09	26.38	108	00:32:09
00:34:34	25.67	53.99	27.08	26.37	108	00:32:10
00:34:35	25.66	54.11	27.1	26.36	109	00:32:11
00:34:36	25.68	54.11	27.09	26.38	109	00:32:12
00:34:37	25.73	54.05	27.1	26.43	109	00:32:13
00:34:38	25.72	53.83	27.09	26.42	108	00:32:14
00:34:40	25.72	53.86	27.09	26.42	107	00:32:15
00:34:41	25.7	54.4	27.09	26.4	106	00:32:16
00:34:42	25.67	54.68	27.1	26.37	106	00:32:17
00:34:43	25.67	54.68	27.1	26.37	105	00:32:18
00:34:44	25.65	54.43	27.1	26.35	105	00:32:19
00:34:45	25.63	54.65	27.1	26.33	105	00:32:20
00:34:46	25.6	55.06	27.09	26.3	105	00:32:21
00:34:47	25.58	55.18	27.1	26.28	105	00:32:22
00:34:48	25.53	54.65	27.09	26.23	104	00:32:23
00:34:49	25.51	53.7	27.08	26.21	104	00:32:24
00:34:50	25.46	52.68	27.1	26.16	105	00:32:25
00:34:51	25.36	51.98	27.1	26.06	107	00:32:26
00:34:52	25.32	52.58	27.09	26.02	107	00:32:27
00:34:53	25.26	52.87	27.11	25.96	108	00:32:28
00:34:55	25.21	53.1	27.1	25.91	110	00:32:29
00:34:56	25.15	53.19	27.1	25.85	111	00:32:30
00:34:57	25.12	53.6	27.1	25.82	111	00:32:31
00:34:58	25.08	54.3	27.11	25.78	111	00:32:32
00:34:59	25.05	54.81	27.11	25.75	112	00:32:33
00:35:00	25.01	55.06	27.1	25.71	112	00:32:34
00:35:01	24.99	54.87	27.12	25.69	112	00:32:35
00:35:02	24.98	55.09	27.11	25.68	113	00:32:36
00:35:03	24.95	55.82	27.1	25.65	114	00:32:37
00:35:04	24.93	56.54	27.1	25.63	114	00:32:38
00:35:05	24.91	57.19	27.12	25.61	114	00:32:39
00:35:06	24.87	57.6	27.12	25.57	110	00:32:40
00:35:07	24.86	57.53	27.12	25.56	108	00:32:41
00:35:09	24.86	57.07	27.11	25.56	109	00:32:42
00:35:10	24.86	56.6	27.11	25.56	109	00:32:43
00:35:11	24.87	56.26	27.12	25.57	109	00:32:44
00:35:12	24.87	56.13	27.13	25.57	109	00:32:45
00:35:13	24.87	55.94	27.12	25.57	109	00:32:46
00:35:14	24.87	55.53	27.12	25.57	109	00:32:47
00:35:15	24.87	55.09	27.12	25.57	109	00:32:48
00:35:16	24.86	55.16	27.12	25.56	109	00:32:49
00:35:17	24.87	55.54	27.13	25.57	110	00:32:50
00:35:18	24.88	56.41	27.14	25.58	112	00:32:51
00:35:19	24.87	56.6	27.13	25.57	113	00:32:52
00:35:20	24.91	56.44	27.14	25.61	114	00:32:53
00:35:21	24.91	56.07	27.14	25.61	115	00:32:54
00:35:22	24.92	55.69	27.13	25.62	115	00:32:55
00:35:24	24.96	56.04	27.14	25.66	114	00:32:56
00:35:25	24.97	56.23	27.14	25.67	114	00:32:57
00:35:26	24.99	55.98	27.14	25.69	113	00:32:58
00:35:27	25.01	55.63	27.15	25.71	113	00:32:59
00:35:28	25.03	55.7	27.16	25.73	112	00:33:00
00:35:29	25.06	55.98	27.14	25.76	111	00:33:01
00:35:30	25.09	56.26	27.16	25.79	111	00:33:02
00:35:31	25.13	56.16	27.15	25.83	110	00:33:03
00:35:32	25.15	55.66	27.16	25.85	111	00:33:04
00:35:33	25.18	55.57	27.17	25.88	110	00:33:05
00:35:34	25.21	55.82	27.17	25.91	110	00:33:06
00:35:35	25.26	55.95	27.16	25.96	111	00:33:07
00:35:36	25.29	55.76	27.15	25.99	112	00:33:08
00:35:38	25.31	55.38	27.16	26.01	113	00:33:09
00:35:39	25.33	55.01	27.17	26.03	114	00:33:10
00:35:40	25.37	54.69	27.17	26.07	115	00:33:11
00:35:41	25.38	54.25	27.16	26.08	116	00:33:12
00:35:42	25.42	54.91	27.17	26.12	117	00:33:13
00:35:43	25.45	54.75	27.18	26.15	119	00:33:14
00:35:44	25.48	54.88	27.19	26.18	120	00:33:15
00:35:45	25.51	54.85	27.18	26.21	121	00:33:16
00:35:46	25.56	53.68	27.17	26.26	122	00:33:17
00:35:47	25.59	52.88	27.17	26.29	123	00:33:18
[truncated: 3,341 more rows]

## Sheet: 4
Time (h:m:s)	Tc (C)	RH (%)	Ta (C)	Tc (C)	HR (bpm)	Time HR	Correction factor	1.3
00:00:06	35.92	43.97	25.72	37.22	69	00:00:00
00:00:07	35.91	43.87	25.75	37.21	67	00:00:01
00:00:08	35.94	43.74	25.74	37.24	67	00:00:02
00:00:09	35.94	43.6	25.75	37.24	66	00:00:03
00:00:10	35.94	43.5	25.75	37.24	67	00:00:04
00:00:11	35.95	43.4	25.76	37.25	67	00:00:05
00:00:12	35.96	43.27	25.76	37.26	67	00:00:06
00:00:13	35.96	43.2	25.75	37.26	68	00:00:07
00:00:14	35.96	43.17	25.76	37.26	68	00:00:08
00:00:15	35.96	43.14	25.76	37.26	68	00:00:09
00:00:16	35.96	43.14	25.76	37.26	68	00:00:10
00:00:17	35.96	43.07	25.77	37.26	69	00:00:11
00:00:18	35.96	43.07	25.77	37.26	72	00:00:12
00:00:19	35.96	43.07	25.78	37.26	73	00:00:13
00:00:20	35.96	43.04	25.78	37.26	73	00:00:14
00:00:21	35.96	42.97	25.78	37.26	72	00:00:15
00:00:22	35.96	42.91	25.78	37.26	71	00:00:16
00:00:23	35.96	42.87	25.79	37.26	70	00:00:17
00:00:24	35.95	42.81	25.79	37.25	69	00:00:18
00:00:25	35.95	42.87	25.8	37.25	69	00:00:19
00:00:26	35.96	42.81	25.8	37.26	69	00:00:20
00:00:27	35.96	42.77	25.82	37.26	69	00:00:21
00:00:28	35.96	42.74	25.81	37.26	69	00:00:22
00:00:29	35.96	42.74	25.82	37.26	69	00:00:23
00:00:30	35.96	42.68	25.83	37.26	68	00:00:24
00:00:31	35.95	42.61	25.84	37.25	69	00:00:25
00:00:32	35.95	42.48	25.83	37.25	70	00:00:26
00:00:33	35.94	42.34	25.84	37.24	70	00:00:27
00:00:34	35.95	42.31	25.84	37.25	69	00:00:28
00:00:35	35.95	42.24	25.85	37.25	69	00:00:29
00:00:36	35.95	42.21	25.85	37.25	67	00:00:30
00:00:37	35.95	42.17	25.84	37.25	67	00:00:31
00:00:38	35.96	42.21	25.85	37.26	68	00:00:32
00:00:39	35.95	42.28	25.86	37.25	68	00:00:33
00:00:40	35.95	42.38	25.86	37.25	69	00:00:34
00:00:41	35.95	42.45	25.86	37.25	69	00:00:35
00:00:42	35.95	42.38	25.86	37.25	71	00:00:36
00:00:43	35.95	42.34	25.88	37.25	75	00:00:37
00:00:44	35.96	42.35	25.87	37.26	78	00:00:38
00:00:45	35.96	42.34	25.89	37.26	79	00:00:39
00:00:46	35.96	42.35	25.87	37.26	79	00:00:40
00:00:47	35.96	42.61	25.88	37.26	75	00:00:41
00:00:48	35.96	42.82	25.87	37.26	72	00:00:42
00:00:49	35.96	42.95	25.87	37.26	69	00:00:43
00:00:50	35.96	42.95	25.88	37.26	66	00:00:44
00:00:51	35.96	43.05	25.88	37.26	65	00:00:45
00:00:52	35.96	43.12	25.88	37.26	65	00:00:46
00:00:53	35.96	43.09	25.88	37.26	65	00:00:47
00:00:54	35.96	43.15	25.88	37.26	67	00:00:48
00:00:55	35.95	43.15	25.9	37.25	67	00:00:49
00:00:56	35.95	43.09	25.9	37.25	67	00:00:50
00:00:57	35.95	43.05	25.91	37.25	68	00:00:51
00:00:58	35.94	43.12	25.91	37.24	68	00:00:52
00:00:59	35.93	43.16	25.93	37.23	68	00:00:53
00:01:00	35.94	43.15	25.93	37.24	68	00:00:54
00:01:01	35.94	43.16	25.94	37.24	69	00:00:55
00:01:02	35.94	43.09	25.93	37.24	69	00:00:56
00:01:03	35.95	43.06	25.94	37.25	68	00:00:57
00:01:04	35.96	43.19	25.94	37.26	67	00:00:58
00:01:05	35.96	43.22	25.95	37.26	68	00:00:59
00:01:06	35.96	43.12	25.96	37.26	69	00:01:00
00:01:07	35.96	43.09	25.94	37.26	72	00:01:01
00:01:08	35.96	43.02	25.96	37.26	73	00:01:02
00:01:09	35.96	42.89	25.95	37.26	74	00:01:03
00:01:10	35.96	42.79	25.96	37.26	75	00:01:04
00:01:11	35.96	42.76	25.96	37.26	76	00:01:05
00:01:12	35.96	42.76	25.97	37.26	76	00:01:06
00:01:13	35.96	42.83	25.98	37.26	77	00:01:07
00:01:14	35.96	43.16	25.98	37.26	76	00:01:08
00:01:15	35.97	43.53	25.98	37.27	73	00:01:09
00:01:16	35.97	43.9	26	37.27	72	00:01:10
00:01:17	35.97	44.17	26.01	37.27	71	00:01:11
00:01:18	35.97	44.26	26.01	37.27	69	00:01:12
00:01:19	35.97	44.2	26.01	37.27	68	00:01:13
00:01:20	35.96	44.1	26.01	37.26	67	00:01:14
00:01:21	35.96	44.03	26	37.26	65	00:01:15
00:01:22	35.96	43.93	26	37.26	63	00:01:16
00:01:23	35.96	43.83	26.01	37.26	64	00:01:17
00:01:24	35.95	43.7	26.01	37.25	64	00:01:18
00:01:25	35.95	43.57	26.03	37.25	65	00:01:19
00:01:26	35.95	43.47	26.02	37.25	67	00:01:20
00:01:27	35.95	43.37	26.02	37.25	70	00:01:21
00:01:28	35.95	43.3	26.03	37.25	72	00:01:22
00:01:29	35.96	43.24	26.05	37.26	72	00:01:23
00:01:30	35.96	43.2	26.06	37.26	71	00:01:24
00:01:31	35.96	43.14	26.05	37.26	70	00:01:25
00:01:32	35.96	43.07	26.07	37.26	69	00:01:26
00:01:33	35.96	43	26.1	37.26	68	00:01:27
00:01:34	35.96	42.97	26.08	37.26	68	00:01:28
00:01:35	35.95	42.9	26.08	37.25	69	00:01:29
00:01:36	35.95	42.84	26.09	37.25	69	00:01:30
00:01:37	35.95	42.84	26.1	37.25	72	00:01:31
00:01:38	35.95	42.84	26.09	37.25	74	00:01:32
00:01:39	35.95	42.77	26.08	37.25	75	00:01:33
00:01:40	35.96	42.71	26.11	37.26	77	00:01:34
00:01:41	35.96	42.64	26.1	37.26	76	00:01:35
00:01:42	35.96	42.64	26.1	37.26	74	00:01:36
00:01:43	35.96	42.64	26.13	37.26	71	00:01:37
00:01:44	35.95	42.71	26.12	37.25	70	00:01:38
00:01:45	35.95	42.71	26.13	37.25	69	00:01:39
00:01:46	35.95	42.71	26.13	37.25	69	00:01:40
00:01:47	35.95	42.68	26.13	37.25	72	00:01:41
00:01:48	35.95	42.64	26.13	37.25	72	00:01:42
00:01:49	35.96	42.64	26.14	37.26	71	00:01:43
00:01:50	35.96	42.65	26.14	37.26	69	00:01:44
00:01:51	35.96	42.61	26.15	37.26	68	00:01:45
00:01:52	35.96	42.58	26.15	37.26	68	00:01:46
00:01:53	35.96	42.51	26.16	37.26	69	00:01:47
00:01:54	35.97	42.48	26.15	37.27	71	00:01:48
00:01:55	35.97	42.44	26.16	37.27	72	00:01:49
00:01:56	35.97	42.38	26.16	37.27	74	00:01:50
00:01:57	35.98	42.34	26.17	37.28	74	00:01:51
00:01:58	35.98	42.28	26.18	37.28	75	00:01:52
00:01:59	35.96	42.25	26.18	37.26	74	00:01:53
00:02:00	35.96	42.21	26.19	37.26	72	00:01:54
00:02:01	35.95	42.21	26.2	37.25	71	00:01:55
00:02:02	35.94	42.25	26.2	37.24	70	00:01:56
00:02:03	35.94	42.28	26.22	37.24	70	00:01:57
00:02:04	35.96	42.31	26.2	37.26	70	00:01:58
00:02:05	35.96	42.31	26.2	37.26	71	00:01:59
00:02:06	35.97	42.32	26.22	37.27	74	00:02:00
00:02:07	35.97	42.32	26.22	37.27	77	00:02:01
00:02:08	35.97	42.25	26.22	37.27	76	00:02:02
00:02:09	35.97	42.18	26.22	37.27	73	00:02:03
00:02:10	35.97	42.18	26.22	37.27	69	00:02:04
00:02:11	35.96	42.25	26.23	37.26	66	00:02:05
00:02:12	35.96	42.28	26.23	37.26	64	00:02:06
00:02:13	35.96	42.42	26.24	37.26	66	00:02:07
00:02:14	35.97	42.45	26.25	37.27	69	00:02:08
00:02:15	35.97	42.52	26.25	37.27	71	00:02:09
00:02:16	35.97	42.49	26.25	37.27	71	00:02:10
00:02:17	35.98	42.52	26.25	37.28	70	00:02:11
00:02:18	35.98	42.45	26.25	37.28	69	00:02:12
00:02:19	35.96	42.39	26.26	37.26	70	00:02:13
00:02:20	35.96	42.32	26.26	37.26	71	00:02:14
00:02:21	35.96	42.22	26.25	37.26	72	00:02:15
00:02:22	35.95	42.19	26.26	37.25	70	00:02:16
00:02:23	35.95	42.15	26.27	37.25	69	00:02:17
00:02:24	35.97	42.16	26.28	37.27	68	00:02:18
00:02:25	35.97	42.19	26.29	37.27	67	00:02:19
00:02:26	35.97	42.16	26.29	37.27	68	00:02:20
00:02:27	35.97	42.12	26.3	37.27	70	00:02:21
00:02:28	35.97	42.09	26.29	37.27	71	00:02:22
00:02:29	35.97	42.13	26.3	37.27	72	00:02:23
00:02:30	35.97	42.19	26.31	37.27	71	00:02:24
00:02:31	35.97	42.26	26.31	37.27	68	00:02:25
00:02:32	35.97	42.33	26.33	37.27	68	00:02:26
00:02:33	35.97	42.4	26.34	37.27	66	00:02:27
00:02:34	35.97	42.33	26.32	37.27	65	00:02:28
00:02:35	35.97	42.26	26.32	37.27	66	00:02:29
00:02:36	35.98	42.16	26.32	37.28	68	00:02:30
00:02:37	35.98	42.16	26.33	37.28	69	00:02:31
00:02:38	35.99	42.36	26.33	37.29	71	00:02:32
00:02:39	35.98	42.53	26.33	37.28	72	00:02:33
00:02:40	35.97	42.6	26.33	37.27	71	00:02:34
00:02:41	35.97	42.5	26.32	37.27	72	00:02:35
00:02:42	35.96	42.43	26.34	37.26	72	00:02:36
00:02:43	35.94	42.33	26.35	37.24	71	00:02:37
00:02:44	35.95	42.46	26.34	37.25	70	00:02:38
00:02:45	35.95	42.53	26.35	37.25	70	00:02:39
00:02:46	35.95	42.33	26.35	37.25	67	00:02:40
00:02:47	35.96	42.09	26.34	37.26	67	00:02:41
00:02:48	35.97	41.79	26.36	37.27	66	00:02:42
00:02:49	35.97	41.59	26.35	37.27	65	00:02:43
00:02:50	35.97	41.45	26.36	37.27	64	00:02:44
00:02:51	35.97	41.32	26.35	37.27	65	00:02:45
00:02:52	35.97	41.18	26.34	37.27	66	00:02:46
00:02:53	35.97	41.05	26.34	37.27	68	00:02:47
00:02:54	35.97	40.98	26.36	37.27	70	00:02:48
00:02:55	35.96	40.98	26.36	37.26	69	00:02:49
00:02:56	35.96	40.91	26.35	37.26	68	00:02:50
00:02:57	35.96	40.88	26.36	37.26	67	00:02:51
00:02:58	35.96	40.85	26.37	37.26	67	00:02:52
00:02:59	35.96	40.81	26.36	37.26	68	00:02:53
00:03:00	35.96	40.81	26.37	37.26	72	00:02:54
00:03:01	35.96	40.78	26.37	37.26	75	00:02:55
00:03:02	35.96	40.78	26.36	37.26	73	00:02:56
00:03:03	35.95	40.78	26.38	37.25	70	00:02:57
00:03:04	35.95	40.78	26.39	37.25	68	00:02:58
00:03:05	35.95	40.78	26.39	37.25	66	00:02:59
00:03:06	35.95	40.78	26.38	37.25	65	00:03:00
00:03:07	35.95	40.78	26.4	37.25	64	00:03:01
00:03:08	35.96	40.78	26.4	37.26	63	00:03:02
00:03:09	35.97	40.85	26.38	37.27	64	00:03:03
00:03:10	35.97	40.92	26.39	37.27	65	00:03:04
00:03:11	35.97	40.99	26.39	37.27	67	00:03:05
00:03:12	35.97	41.06	26.41	37.27	69	00:03:06
00:03:13	35.97	41.12	26.4	37.27	70	00:03:07
00:03:14	35.96	41.12	26.4	37.26	73	00:03:08
00:03:15	35.97	41.16	26.4	37.27	76	00:03:09
00:03:16	35.97	41.19	26.42	37.27	76	00:03:10
00:03:17	35.96	41.19	26.44	37.26	74	00:03:11
00:03:18	35.96	41.26	26.43	37.26	72	00:03:12
00:03:19	35.96	41.33	26.43	37.26	69	00:03:13
00:03:20	35.95	41.29	26.44	37.25	68	00:03:14
00:03:21	35.95	41.33	26.44	37.25	69	00:03:15
00:03:22	35.97	41.33	26.46	37.27	70	00:03:16
00:03:23	35.97	41.47	26.45	37.27	72	00:03:17
00:03:24	35.97	41.6	26.45	37.27	73	00:03:18
00:03:25	35.97	41.6	26.45	37.27	72	00:03:19
00:03:26	35.97	41.6	26.46	37.27	71	00:03:20
00:03:27	35.96	41.47	26.46	37.26	70	00:03:21
00:03:28	35.96	41.36	26.45	37.26	69	00:03:22
00:03:29	35.96	41.33	26.46	37.26	70	00:03:23
00:03:30	35.96	41.3	26.45	37.26	71	00:03:24
00:03:31	35.96	41.33	26.46	37.26	74	00:03:25
00:03:32	35.96	41.47	26.47	37.26	75	00:03:26
00:03:33	35.96	41.5	26.47	37.26	75	00:03:27
00:03:34	35.96	41.67	26.46	37.26	73	00:03:28
00:03:35	35.96	41.94	26.47	37.26	70	00:03:29
00:03:36	35.96	42.04	26.48	37.26	66	00:03:30
00:03:37	35.96	41.94	26.47	37.26	64	00:03:31
00:03:38	35.95	41.87	26.48	37.25	62	00:03:32
00:03:39	35.94	41.77	26.49	37.24	61	00:03:33
00:03:40	35.94	41.67	26.5	37.24	62	00:03:34
00:03:41	35.94	41.57	26.51	37.24	64	00:03:35
00:03:42	35.94	41.51	26.51	37.24	65	00:03:36
00:03:43	35.95	41.47	26.51	37.25	68	00:03:37
00:03:44	35.96	41.44	26.52	37.26	69	00:03:38
00:03:45	35.96	41.41	26.51	37.26	71	00:03:39
00:03:46	35.96	41.41	26.52	37.26	71	00:03:40
00:03:47	35.96	41.37	26.51	37.26	71	00:03:41
00:03:48	35.95	41.41	26.53	37.25	71	00:03:42
00:03:49	35.95	41.44	26.54	37.25	70	00:03:43
00:03:50	35.95	41.47	26.54	37.25	70	00:03:44
00:03:51	35.94	41.51	26.52	37.24	72	00:03:45
00:03:52	35.93	41.61	26.53	37.23	73	00:03:46
00:03:53	35.94	41.65	26.55	37.24	72	00:03:47
00:03:54	35.94	41.75	26.55	37.24	70	00:03:48
00:03:55	35.94	42.02	26.53	37.24	66	00:03:49
00:03:56	35.95	42.32	26.56	37.25	64	00:03:50
00:03:57	35.96	42.46	26.57	37.26	64	00:03:51
00:03:58	35.96	42.56	26.58	37.26	63	00:03:52
00:03:59	35.96	42.62	26.58	37.26	63	00:03:53
00:04:00	35.96	42.76	26.58	37.26	65	00:03:54
00:04:01	35.96	42.83	26.59	37.26	67	00:03:55
00:04:02	35.95	42.93	26.59	37.25	69	00:03:56
00:04:03	35.95	43	26.6	37.25	71	00:03:57
00:04:04	35.95	43.03	26.6	37.25	72	00:03:58
00:04:05	35.95	42.83	26.61	37.25	75	00:03:59
00:04:06	35.95	42.56	26.61	37.25	74	00:04:00
00:04:07	35.96	42.33	26.6	37.26	74	00:04:01
00:04:08	35.96	42.09	26.61	37.26	73	00:04:02
00:04:09	35.96	41.89	26.62	37.26	73	00:04:03
00:04:10	35.96	41.89	26.62	37.26	74	00:04:04
00:04:11	35.96	42.33	26.63	37.26	74	00:04:05
00:04:12	35.96	42.76	26.63	37.26	75	00:04:06
00:04:13	35.96	43.03	26.62	37.26	76	00:04:07
00:04:14	35.96	43.17	26.64	37.26	79	00:04:08
00:04:15	35.96	43.3	26.62	37.26	81	00:04:09
00:04:16	35.95	43.3	26.65	37.25	83	00:04:10
00:04:17	35.95	43.3	26.66	37.25	81	00:04:11
00:04:18	35.95	43.3	26.65	37.25	79	00:04:12
00:04:19	35.95	43.24	26.64	37.25	76	00:04:13
00:04:20	35.95	43.17	26.66	37.25	73	00:04:14
00:04:21	35.96	43.1	26.66	37.26	72	00:04:15
00:04:22	35.96	42.87	26.66	37.26	72	00:04:16
00:04:23	35.96	42.63	26.67	37.26	74	00:04:17
00:04:24	35.96	42.4	26.68	37.26	74	00:04:18
00:04:25	35.96	42.2	26.68	37.26	75	00:04:19
00:04:26	35.96	42.1	26.69	37.26	76	00:04:20
00:04:27	35.96	42.03	26.68	37.26	76	00:04:21
00:04:28	35.96	41.96	26.69	37.26	74	00:04:22
00:04:29	35.96	41.9	26.7	37.26	70	00:04:23
00:04:30	35.96	41.76	26.69	37.26	67	00:04:24
00:04:31	35.96	41.66	26.7	37.26	65	00:04:25
00:04:32	35.96	41.56	26.69	37.26	64	00:04:26
00:04:33	35.96	41.53	26.69	37.26	65	00:04:27
00:04:34	35.96	41.49	26.7	37.26	66	00:04:28
00:04:35	35.96	41.49	26.69	37.26	68	00:04:29
00:04:36	35.96	41.49	26.72	37.26	70	00:04:30
00:04:37	35.95	41.49	26.72	37.25	74	00:04:31
00:04:38	35.95	41.49	26.71	37.25	76	00:04:32
00:04:39	35.95	41.5	26.72	37.25	76	00:04:33
00:04:40	35.95	41.53	26.73	37.25	74	00:04:34
00:04:41	35.95	41.5	26.74	37.25	72	00:04:35
00:04:42	35.96	41.43	26.73	37.26	70	00:04:36
00:04:43	35.96	41.46	26.73	37.26	67	00:04:37
00:04:44	35.96	41.46	26.73	37.26	66	00:04:38
00:04:45	35.96	41.5	26.74	37.26	67	00:04:39
00:04:46	35.96	41.5	26.74	37.26	69	00:04:40
00:04:47	35.96	41.5	26.75	37.26	70	00:04:41
00:04:48	35.96	41.5	26.75	37.26	71	00:04:42
00:04:49	35.96	41.53	26.77	37.26	71	00:04:43
00:04:50	35.95	41.57	26.77	37.25	71	00:04:44
00:04:51	35.95	41.6	26.79	37.25	71	00:04:45
00:04:52	35.94	41.64	26.78	37.24	71	00:04:46
00:04:53	35.94	41.63	26.76	37.24	71	00:04:47
00:04:54	35.94	41.57	26.78	37.24	72	00:04:48
00:04:55	35.95	41.5	26.78	37.25	73	00:04:49
00:04:56	35.95	41.43	26.8	37.25	73	00:04:50
00:04:57	35.96	41.4	26.79	37.26	74	00:04:51
00:04:58	35.96	41.3	26.78	37.26	76	00:04:52
00:04:59	35.96	41.16	26.81	37.26	77	00:04:53
00:05:00	35.96	41.13	26.82	37.26	76	00:04:54
00:05:01	35.96	41.17	26.81	37.26	74	00:04:55
00:05:02	35.95	41.2	26.81	37.25	72	00:04:56
00:05:03	35.93	41.2	26.82	37.23	71	00:04:57
00:05:04	35.93	41.17	26.82	37.23	70	00:04:58
00:05:05	35.92	41.1	26.82	37.22	71	00:04:59
00:05:06	35.93	41.03	26.83	37.23	74	00:05:00
00:05:07	35.94	41	26.84	37.24	76	00:05:01
00:05:08	35.94	41.03	26.84	37.24	76	00:05:02
00:05:09	35.94	41.14	26.84	37.24	75	00:05:03
00:05:10	35.95	41.2	26.86	37.25	73	00:05:04
00:05:11	35.95	41.24	26.86	37.25	74	00:05:05
00:05:12	35.94	41.31	26.87	37.24	74	00:05:06
00:05:13	35.95	41.31	26.87	37.25	73	00:05:07
00:05:14	35.95	41.31	26.88	37.25	72	00:05:08
00:05:15	35.95	41.31	26.88	37.25	72	00:05:09
00:05:16	35.96	41.28	26.9	37.26	71	00:05:10
00:05:17	35.96	41.24	26.89	37.26	72	00:05:11
00:05:18	35.96	41.21	26.88	37.26	73	00:05:12
00:05:19	35.95	41.18	26.88	37.25	75	00:05:13
00:05:20	35.95	41.24	26.89	37.25	76	00:05:14
00:05:21	35.94	41.24	26.9	37.24	76	00:05:15
00:05:22	35.95	41.21	26.91	37.25	76	00:05:16
00:05:23	35.95	41.24	26.9	37.25	78	00:05:17
00:05:24	35.96	41.35	26.92	37.26	78	00:05:18
00:05:25	35.96	41.52	26.92	37.26	77	00:05:19
00:05:26	35.96	41.58	26.92	37.26	76	00:05:20
00:05:27	35.96	41.65	26.92	37.26	77	00:05:21
00:05:28	35.96	41.59	26.93	37.26	78	00:05:22
00:05:29	35.96	41.59	26.93	37.26	78	00:05:23
00:05:30	35.96	41.62	26.94	37.26	76	00:05:24
00:05:31	35.97	41.72	26.94	37.27	73	00:05:25
00:05:32	35.97	41.79	26.94	37.27	72	00:05:26
00:05:33	35.96	41.99	26.96	37.26	71	00:05:27
00:05:34	35.96	42.06	26.95	37.26	70	00:05:28
00:05:35	35.96	41.99	26.96	37.26	71	00:05:29
00:05:36	35.95	41.93	26.96	37.25	72	00:05:30
00:05:37	35.95	41.79	26.95	37.25	71	00:05:31
00:05:38	35.94	41.72	26.97	37.24	71	00:05:32
00:05:39	35.94	41.62	26.97	37.24	70	00:05:33
00:05:40	35.94	41.52	26.98	37.24	69	00:05:34
00:05:41	35.96	41.52	26.98	37.26	70	00:05:35
00:05:42	35.96	41.52	26.98	37.26	70	00:05:36
00:05:43	35.97	41.52	26.99	37.27	69	00:05:37
00:05:44	35.97	41.52	27	37.27	69	00:05:38
00:05:45	35.97	41.46	26.98	37.27	70	00:05:39
00:05:46	35.96	41.39	26.99	37.26	70	00:05:40
00:05:47	35.96	41.32	26.99	37.26	71	00:05:41
00:05:48	35.97	41.25	27.01	37.27	70	00:05:42
00:05:49	35.97	41.26	27	37.27	69	00:05:43
00:05:50	35.98	41.22	27.03	37.28	69	00:05:44
00:05:51	35.98	41.19	27.02	37.28	68	00:05:45
00:05:52	35.98	41.16	27.03	37.28	68	00:05:46
00:05:53	35.98	41.12	27.04	37.28	68	00:05:47
00:05:54	35.99	41.12	27.04	37.29	69	00:05:48
00:05:55	35.99	41.12	27.04	37.29	70	00:05:49
00:05:56	36	41.13	27.06	37.3	72	00:05:50
00:05:57	35.98	41.12	27.07	37.28	72	00:05:51
00:05:58	35.98	41.06	27.06	37.28	72	00:05:52
00:05:59	35.98	41.06	27.06	37.28	70	00:05:53
00:06:00	35.97	40.99	27.08	37.27	70	00:05:54
00:06:01	35.97	40.96	27.09	37.27	68	00:05:55
00:06:02	35.99	40.92	27.08	37.29	67	00:05:56
00:06:03	35.99	40.89	27.08	37.29	68	00:05:57
00:06:04	35.98	40.86	27.09	37.28	68	00:05:58
00:06:05	35.99	40.86	27.08	37.29	68	00:05:59
00:06:06	35.99	40.86	27.1	37.29	67	00:06:00
00:06:07	35.99	40.82	27.1	37.29	67	00:06:01
00:06:08	35.98	40.79	27.11	37.28	67	00:06:02
00:06:09	35.98	40.72	27.13	37.28	68	00:06:03
00:06:10	35.96	40.66	27.12	37.26	71	00:06:04
00:06:11	35.95	40.59	27.13	37.25	72	00:06:05
00:06:12	35.94	40.56	27.14	37.24	72	00:06:06
00:06:13	35.95	40.52	27.14	37.25	70	00:06:07
00:06:14	35.95	40.52	27.15	37.25	69	00:06:08
00:06:15	35.97	40.52	27.15	37.27	69	00:06:09
00:06:16	35.98	40.49	27.15	37.28	68	00:06:10
00:06:17	35.99	40.53	27.17	37.29	67	00:06:11
00:06:18	35.97	40.53	27.16	37.27	66	00:06:12
00:06:19	35.98	40.53	27.16	37.28	66	00:06:13
00:06:20	35.98	40.53	27.16	37.28	68	00:06:14
00:06:21	35.98	40.49	27.17	37.28	70	00:06:15
00:06:22	35.97	40.53	27.17	37.27	72	00:06:16
00:06:23	35.98	40.53	27.16	37.28	72	00:06:17
00:06:24	35.97	40.56	27.17	37.27	71	00:06:18
00:06:25	35.97	40.56	27.18	37.27	71	00:06:19
00:06:26	35.96	40.53	27.17	37.26	70	00:06:20
00:06:27	35.95	40.49	27.19	37.25	70	00:06:21
00:06:28	35.96	40.46	27.2	37.26	69	00:06:22
00:06:29	35.96	40.39	27.21	37.26	69	00:06:23
00:06:30	35.96	40.4	27.21	37.26	70	00:06:24
00:06:31	35.96	40.4	27.22	37.26	70	00:06:25
00:06:32	35.97	40.4	27.22	37.27	71	00:06:26
00:06:33	35.97	40.4	27.23	37.27	72	00:06:27
00:06:34	35.97	40.47	27.23	37.27	75	00:06:28
00:06:35	35.97	40.53	27.23	37.27	74	00:06:29
00:06:36	35.98	40.53	27.22	37.28	71	00:06:30
00:06:37	35.99	40.53	27.23	37.29	70	00:06:31
00:06:38	35.98	40.6	27.24	37.28	70	00:06:32
00:06:39	35.96	40.67	27.25	37.26	69	00:06:33
00:06:40	35.95	40.64	27.24	37.25	69	00:06:34
00:06:41	35.95	40.53	27.24	37.25	71	00:06:35
00:06:42	35.94	40.43	27.24	37.24	72	00:06:36
00:06:43	35.94	40.33	27.25	37.24	71	00:06:37
00:06:44	35.95	40.26	27.25	37.25	71	00:06:38
00:06:45	35.95	40.26	27.26	37.25	70	00:06:39
00:06:46	35.95	40.23	27.26	37.25	69	00:06:40
00:06:47	35.94	40.26	27.26	37.24	69	00:06:41
00:06:48	35.93	40.26	27.26	37.23	69	00:06:42
00:06:49	35.93	40.23	27.25	37.23	68	00:06:43
00:06:50	35.93	40.16	27.28	37.23	67	00:06:44
00:06:51	35.93	40.13	27.28	37.23	67	00:06:45
00:06:52	35.92	40.13	27.27	37.22	66	00:06:46
00:06:53	35.91	40.1	27.29	37.21	66	00:06:47
00:06:54	35.9	40.06	27.3	37.2	66	00:06:48
00:06:55	35.89	40.06	27.3	37.19	66	00:06:49
00:06:56	35.88	40.03	27.29	37.18	67	00:06:50
00:06:57	35.88	40.03	27.3	37.18	67	00:06:51
00:06:58	35.89	40.03	27.31	37.19	67	00:06:52
00:06:59	35.89	40.06	27.3	37.19	67	00:06:53
00:07:00	35.89	40.13	27.3	37.19	69	00:06:54
00:07:01	35.89	40.2	27.31	37.19	70	00:06:55
00:07:02	35.9	40.27	27.31	37.2	69	00:06:56
00:07:03	35.9	40.27	27.32	37.2	68	00:06:57
00:07:04	35.9	40.24	27.33	37.2	67	00:06:58
00:07:05	35.91	40.27	27.33	37.21	66	00:06:59
00:07:06	35.9	40.3	27.34	37.2	66	00:07:00
00:07:07	35.9	40.3	27.33	37.2	66	00:07:01
00:07:08	35.89	40.34	27.35	37.19	65	00:07:02
00:07:09	35.89	40.38	27.35	37.19	66	00:07:03
00:07:10	35.89	40.38	27.37	37.19	66	00:07:04
00:07:11	35.89	40.34	27.37	37.19	66	00:07:05
00:07:12	35.88	40.31	27.35	37.18	68	00:07:06
00:07:13	35.88	40.21	27.36	37.18	68	00:07:07
00:07:14	35.87	40.14	27.37	37.17	67	00:07:08
00:07:15	35.87	40	27.36	37.17	66	00:07:09
00:07:16	35.87	39.94	27.39	37.17	66	00:07:10
00:07:17	35.87	39.87	27.4	37.17	66	00:07:11
00:07:18	35.88	39.83	27.39	37.18	66	00:07:12
00:07:19	35.89	39.87	27.4	37.19	65	00:07:13
00:07:20	35.88	39.9	27.39	37.18	65	00:07:14
00:07:21	35.88	39.94	27.41	37.18	66	00:07:15
00:07:22	35.89	39.94	27.41	37.19	68	00:07:16
00:07:23	35.89	39.94	27.42	37.19	69	00:07:17
00:07:24	35.88	39.91	27.42	37.18	69	00:07:18
00:07:25	35.89	39.87	27.42	37.19	69	00:07:19
00:07:26	35.9	39.87	27.43	37.2	69	00:07:20
00:07:27	35.9	39.94	27.42	37.2	67	00:07:21
00:07:28	35.9	39.97	27.43	37.2	67	00:07:22
00:07:29	35.9	40.01	27.42	37.2	65	00:07:23
00:07:30	35.89	40.04	27.43	37.19	65	00:07:24
00:07:31	35.88	40.08	27.44	37.18	64	00:07:25
00:07:32	35.87	40.08	27.44	37.17	65	00:07:26
00:07:33	35.87	40.08	27.45	37.17	66	00:07:27
00:07:34	35.88	40.11	27.45	37.18	68	00:07:28
00:07:35	35.89	40.11	27.46	37.19	69	00:07:29
00:07:36	35.9	40.15	27.47	37.2	70	00:07:30
00:07:37	35.91	40.18	27.46	37.21	69	00:07:31
00:07:38	35.91	40.22	27.48	37.21	68	00:07:32
00:07:39	35.91	40.15	27.48	37.21	68	00:07:33
00:07:40	35.9	40.15	27.48	37.2	69	00:07:34
00:07:41	35.89	40.15	27.48	37.19	70	00:07:35
00:07:42	35.89	40.18	27.48	37.19	74	00:07:36
00:07:43	35.89	40.18	27.5	37.19	75	00:07:37
00:07:44	35.89	40.22	27.49	37.19	74	00:07:38
00:07:45	35.9	40.25	27.49	37.2	72	00:07:39
00:07:46	35.91	40.22	27.5	37.21	71	00:07:40
00:07:47	35.91	40.15	27.51	37.21	68	00:07:41
00:07:48	35.92	40.19	27.51	37.22	66	00:07:42
00:07:49	35.93	40.26	27.52	37.23	66	00:07:43
00:07:50	35.94	40.22	27.52	37.24	65	00:07:44
00:07:51	35.95	40.22	27.52	37.25	64	00:07:45
00:07:52	35.94	40.15	27.52	37.24	65	00:07:46
00:07:53	35.92	40.19	27.52	37.22	66	00:07:47
00:07:54	35.9	40.22	27.53	37.2	67	00:07:48
00:07:55	35.89	40.16	27.54	37.19	68	00:07:49
00:07:56	35.88	40.09	27.54	37.18	70	00:07:50
00:07:57	35.88	40.02	27.54	37.18	70	00:07:51
00:07:58	35.89	39.92	27.54	37.19	68	00:07:52
00:07:59	35.9	39.78	27.55	37.2	65	00:07:53
00:08:00	35.9	39.68	27.56	37.2	65	00:07:54
00:08:01	35.9	39.58	27.55	37.2	65	00:07:55
00:08:02	35.91	39.47	27.57	37.21	67	00:07:56
00:08:03	35.91	39.37	27.57	37.21	69	00:07:57
00:08:04	35.92	39.31	27.57	37.22	70	00:07:58
00:08:05	35.92	39.34	27.57	37.22	70	00:07:59
00:08:06	35.93	39.41	27.57	37.23	69	00:08:00
00:08:07	35.94	39.44	27.58	37.24	67	00:08:01
00:08:08	35.95	39.48	27.58	37.25	66	00:08:02
00:08:09	35.95	39.48	27.58	37.25	65	00:08:03
00:08:10	35.96	39.48	27.58	37.26	66	00:08:04
00:08:11	35.96	39.48	27.58	37.26	67	00:08:05
00:08:12	35.96	39.55	27.6	37.26	68	00:08:06
00:08:13	35.96	39.58	27.6	37.26	68	00:08:07
00:08:14	35.96	39.62	27.59	37.26	69	00:08:08
00:08:15	35.95	39.65	27.6	37.25	69	00:08:09
00:08:16	35.95	39.79	27.61	37.25	69	00:08:10
00:08:17	35.95	40.1	27.6	37.25	68	00:08:11
00:08:18	35.95	40.5	27.61	37.25	66	00:08:12
00:08:19	35.94	41.08	27.61	37.24	65	00:08:13
00:08:20	35.95	41.56	27.62	37.25	63	00:08:14
00:08:21	35.95	41.93	27.62	37.25	61	00:08:15
00:08:22	35.95	42.2	27.62	37.25	60	00:08:16
00:08:23	35.94	42.81	27.63	37.24	60	00:08:17
00:08:24	35.95	43.04	27.64	37.25	61	00:08:18
00:08:25	35.95	42.81	27.64	37.25	62	00:08:19
00:08:26	35.95	42.47	27.64	37.25	62	00:08:20
00:08:27	35.95	42.4	27.63	37.25	62	00:08:21
00:08:28	35.96	42.57	27.64	37.26	62	00:08:22
00:08:29	35.96	42.54	27.63	37.26	63	00:08:23
00:08:30	35.96	42.47	27.64	37.26	65	00:08:24
00:08:31	35.95	42.2	27.63	37.25	68	00:08:25
00:08:32	35.94	41.97	27.64	37.24	69	00:08:26
00:08:33	35.94	41.87	27.63	37.24	70	00:08:27
00:08:34	35.93	41.73	27.65	37.23	71	00:08:28
00:08:35	35.93	41.87	27.64	37.23	74	00:08:29
00:08:36	35.94	42.27	27.64	37.24	78	00:08:30
00:08:37	35.94	42.37	27.65	37.24	80	00:08:31
00:08:38	35.93	42.68	27.66	37.23	81	00:08:32
00:08:39	35.94	43.08	27.67	37.24	82	00:08:33
00:08:40	35.94	43.32	27.66	37.24	84	00:08:34
00:08:41	35.94	43.42	27.66	37.24	87	00:08:35
00:08:42	35.95	43.15	27.66	37.25	90	00:08:36
00:08:43	35.95	42.68	27.67	37.25	92	00:08:37
00:08:44	35.94	42.78	27.66	37.24	94	00:08:38
00:08:45	35.94	43.28	27.67	37.24	95	00:08:39
00:08:46	35.93	43.01	27.66	37.23	95	00:08:40
00:08:47	35.93	42.51	27.65	37.23	92	00:08:41
00:08:48	35.94	42.34	27.66	37.24	90	00:08:42
00:08:49	35.95	42.88	27.67	37.25	90	00:08:43
00:08:50	35.94	43.45	27.66	37.24	90	00:08:44
00:08:51	35.95	43.75	27.67	37.25	86	00:08:45
00:08:52	35.95	43.96	27.69	37.25	84	00:08:46
00:08:53	35.95	44.16	27.68	37.25	82	00:08:47
00:08:54	35.95	44.02	27.69	37.25	81	00:08:48
00:08:55	35.96	43.62	27.7	37.26	82	00:08:49
00:08:56	35.96	43.59	27.7	37.26	84	00:08:50
00:08:57	35.96	43.82	27.7	37.26	87	00:08:51
00:08:58	35.95	43.96	27.69	37.25	90	00:08:52
00:08:59	35.95	44.49	27.71	37.25	90	00:08:53
00:09:00	35.95	45.1	27.7	37.25	87	00:08:54
00:09:01	35.94	45.59	27.71	37.24	81	00:08:55
00:09:03	35.94	45.56	27.67	37.24	78	00:08:56
00:09:04	35.92	45.99	27.69	37.22	77	00:08:57
00:09:05	35.91	46.22	27.72	37.21	76	00:08:58
00:09:06	35.9	46.39	27.72	37.2	77	00:08:59
00:09:07	35.9	46.62	27.72	37.2	79	00:09:00
00:09:08	35.91	47.35	27.72	37.21	82	00:09:01
00:09:09	35.92	48.07	27.72	37.22	85	00:09:02
00:09:10	35.93	48.2	27.73	37.23	87	00:09:03
00:09:11	35.93	48.2	27.74	37.23	87	00:09:04
00:09:12	35.93	48.53	27.74	37.23	85	00:09:05
00:09:13	35.92	48.95	27.74	37.22	82	00:09:06
00:09:14	35.92	49.02	27.76	37.22	79	00:09:07
00:09:15	35.92	48.6	27.76	37.22	78	00:09:08
00:09:16	35.92	48.37	27.76	37.22	78	00:09:09
00:09:17	35.92	48.04	27.76	37.22	79	00:09:10
00:09:18	35.92	47.52	27.75	37.22	80	00:09:11
00:09:19	35.93	46.99	27.78	37.23	83	00:09:12
00:09:20	35.92	46.92	27.78	37.22	86	00:09:13
00:09:21	35.93	47.16	27.77	37.23	89	00:09:14
00:09:22	35.93	47.03	27.8	37.23	90	00:09:15
00:09:23	35.93	46.8	27.79	37.23	90	00:09:16
00:09:24	35.93	46.4	27.81	37.23	90	00:09:17
00:09:25	35.94	46.13	27.8	37.24	88	00:09:18
00:09:26	35.94	46.2	27.8	37.24	85	00:09:19
00:09:27	35.93	46.36	27.8	37.23	82	00:09:20
00:09:28	35.93	46.66	27.8	37.23	81	00:09:21
00:09:29	35.92	47.06	27.8	37.22	81	00:09:22
00:09:30	35.92	47.65	27.8	37.22	82	00:09:23
00:09:31	35.93	48.11	27.8	37.23	81	00:09:24
00:09:32	35.94	48.41	27.81	37.24	79	00:09:25
00:09:33	35.94	48.6	27.82	37.24	77	00:09:26
00:09:34	35.95	48.38	27.82	37.25	77	00:09:27
00:09:35	35.94	48.12	27.82	37.24	77	00:09:28
00:09:36	35.94	47.99	27.84	37.24	78	00:09:29
00:09:37	35.94	48.08	27.84	37.24	80	00:09:30
00:09:38	35.94	48.41	27.85	37.24	81	00:09:31
00:09:39	35.93	48.87	27.85	37.23	83	00:09:32
00:09:40	35.94	49.03	27.86	37.24	83	00:09:33
00:09:41	35.94	49.2	27.86	37.24	84	00:09:34
00:09:42	35.93	49.17	27.87	37.23	85	00:09:35
00:09:43	35.94	48.61	27.86	37.24	85	00:09:36
00:09:44	35.94	48.15	27.87	37.24	85	00:09:37
00:09:45	35.92	48.15	27.87	37.22	86	00:09:38
00:09:46	35.92	48.05	27.86	37.22	85	00:09:39
00:09:47	35.92	48.09	27.87	37.22	84	00:09:40
00:09:48	35.9	47.26	27.87	37.2	81	00:09:41
00:09:49	35.9	46.64	27.86	37.2	79	00:09:42
00:09:50	35.9	46.31	27.86	37.2	77	00:09:43
00:09:51	35.9	46.24	27.87	37.2	80	00:09:44
00:09:52	35.91	46.37	27.87	37.21	82	00:09:45
00:09:53	35.93	46.77	27.88	37.23	84	00:09:46
00:09:54	35.94	47.07	27.89	37.24	85	00:09:47
00:09:55	35.95	47.1	27.88	37.25	86	00:09:48
00:09:56	35.95	46.97	27.89	37.25	84	00:09:49
00:09:57	35.94	46.84	27.89	37.24	83	00:09:50
00:09:58	35.93	46.71	27.89	37.23	80	00:09:51
00:09:59	35.93	46.68	27.9	37.23	76	00:09:52
00:10:00	35.93	46.74	27.9	37.23	74	00:09:53
00:10:01	35.93	46.71	27.9	37.23	74	00:09:54
00:10:02	35.93	46.58	27.9	37.23	76	00:09:55
00:10:03	35.93	46.44	27.9	37.23	79	00:09:56
00:10:04	35.92	46.05	27.91	37.22	79	00:09:57
00:10:05	35.92	45.15	27.91	37.22	79	00:09:58
00:10:06	35.9	44.72	27.92	37.2	78	00:09:59
00:10:07	35.89	45.02	27.92	37.19	79	00:10:00
00:10:08	35.88	45.25	27.92	37.18	80	00:10:01
00:10:09	35.87	45.65	27.93	37.17	79	00:10:02
00:10:10	35.85	45.65	27.93	37.15	76	00:10:03
00:10:11	35.84	45.39	27.92	37.14	74	00:10:04
00:10:12	35.81	45.12	27.93	37.11	75	00:10:05
00:10:13	35.79	45.12	27.93	37.09	75	00:10:06
00:10:14	35.78	45.25	27.94	37.08	75	00:10:07
00:10:15	35.76	45.05	27.93	37.06	75	00:10:08
00:10:16	35.74	45.12	27.94	37.04	75	00:10:09
00:10:17	35.74	45.65	27.94	37.04	73	00:10:10
00:10:18	35.74	46.25	27.94	37.04	72	00:10:11
00:10:19	35.74	46.48	27.95	37.04	72	00:10:12
00:10:20	35.75	46.78	27.95	37.05	72	00:10:13
00:10:21	35.75	46.85	27.95	37.05	72	00:10:14
00:10:22	35.74	46.72	27.96	37.04	73	00:10:15
00:10:23	35.73	46.85	27.96	37.03	72	00:10:16
00:10:24	35.73	47.11	27.95	37.03	72	00:10:17
00:10:25	35.72	47.11	27.96	37.02	73	00:10:18
00:10:26	35.72	46.78	27.98	37.02	74	00:10:19
00:10:27	35.72	46.68	27.97	37.02	76	00:10:20
00:10:28	35.72	46.62	27.98	37.02	76	00:10:21
00:10:29	35.71	46.65	27.98	37.01	75	00:10:22
00:10:30	35.69	46.69	27.99	36.99	73	00:10:23
00:10:31	35.67	46.49	27.99	36.97	73	00:10:24
00:10:32	35.66	46.56	27.99	36.96	73	00:10:25
00:10:33	35.64	46.72	28.01	36.94	72	00:10:26
00:10:34	35.64	46.92	28	36.94	72	00:10:27
00:10:36	35.64	46.98	27.96	36.94	72	00:10:28
00:10:37	35.64	47.02	27.99	36.94	72	00:10:29
00:10:38	35.65	47.08	28	36.95	73	00:10:30
00:10:39	35.64	47.12	28	36.94	74	00:10:31
00:10:40	35.64	47.12	28.01	36.94	75	00:10:32
00:10:41	35.64	47.02	28.01	36.94	76	00:10:33
00:10:42	35.64	46.59	28.02	36.94	78	00:10:34
00:10:43	35.64	46.09	28.02	36.94	79	00:10:35
00:10:44	35.64	45.96	28.02	36.94	81	00:10:36
00:10:45	35.63	45.86	28.02	36.93	82	00:10:37
00:10:46	35.62	45.96	28.02	36.92	82	00:10:38
00:10:47	35.61	46.13	28.03	36.91	83	00:10:39
00:10:48	35.6	46.33	28.03	36.9	84	00:10:40
00:10:49	35.6	46.46	28.04	36.9	83	00:10:41
00:10:50	35.6	46.59	28.05	36.9	81	00:10:42
00:10:51	35.6	46.66	28.04	36.9	78	00:10:43
00:10:52	35.6	46.73	28.06	36.9	74	00:10:44
00:10:53	35.6	46.92	28.06	36.9	73	00:10:45
00:10:54	35.61	47.26	28.05	36.91	75	00:10:46
00:10:55	35.62	47.45	28.07	36.92	78	00:10:47
00:10:56	35.62	47.65	28.08	36.92	81	00:10:48
00:10:57	35.63	47.95	28.09	36.93	82	00:10:49
00:10:58	35.64	48.18	28.1	36.94	82	00:10:50
00:10:59	35.63	48.38	28.1	36.93	82	00:10:51
00:11:00	35.62	48.51	28.1	36.92	81	00:10:52
00:11:01	35.62	48.48	28.11	36.92	79	00:10:53
00:11:02	35.61	48.45	28.12	36.91	76	00:10:54
00:11:03	35.6	48.51	28.13	36.9	75	00:10:55
00:11:04	35.59	48.68	28.13	36.89	75	00:10:56
00:11:05	35.6	48.78	28.13	36.9	75	00:10:57
00:11:06	35.59	48.68	28.14	36.89	76	00:10:58
00:11:07	35.59	48.78	28.15	36.89	76	00:10:59
00:11:09	35.6	49.04	28.11	36.9	77	00:11:00
00:11:10	35.59	49.3	28.14	36.89	77	00:11:01
00:11:11	35.6	49.56	28.17	36.9	77	00:11:02
00:11:12	35.6	49.73	28.17	36.9	79	00:11:03
00:11:13	35.59	49.86	28.18	36.89	79	00:11:04
00:11:14	35.58	49.56	28.18	36.88	78	00:11:05
00:11:15	35.57	48.91	28.18	36.87	77	00:11:06
00:11:16	35.57	48.65	28.19	36.87	76	00:11:07
00:11:17	35.56	48.72	28.18	36.86	76	00:11:08
00:11:18	35.56	49.04	28.2	36.86	76	00:11:09
00:11:19	35.56	49.27	28.19	36.86	76	00:11:10
00:11:20	35.56	49.34	28.2	36.86	76	00:11:11
00:11:21	35.55	49.53	28.21	36.85	76	00:11:12
00:11:22	35.55	49.9	28.21	36.85	76	00:11:13
00:11:23	35.56	50.61	28.22	36.86	77	00:11:14
00:11:24	35.57	50.97	28.22	36.87	80	00:11:15
00:11:25	35.58	51.19	28.24	36.88	82	00:11:16
00:11:26	35.59	51.39	28.24	36.89	83	00:11:17
00:11:27	35.6	51.52	28.25	36.9	82	00:11:18
00:11:28	35.6	51.45	28.25	36.9	80	00:11:19
00:11:29	35.6	51.26	28.26	36.9	79	00:11:20
00:11:30	35.59	50.94	28.26	36.89	77	00:11:21
00:11:31	35.58	50.55	28.26	36.88	75	00:11:22
00:11:32	35.57	50.36	28.28	36.87	74	00:11:23
00:11:33	35.56	50.49	28.28	36.86	74	00:11:24
00:11:34	35.54	50.88	28.29	36.84	75	00:11:25
00:11:35	35.53	51.01	28.3	36.83	78	00:11:26
00:11:36	35.54	51.14	28.3	36.84	81	00:11:27
00:11:37	35.54	51.17	28.3	36.84	84	00:11:28
00:11:38	35.54	51.2	28.31	36.84	85	00:11:29
00:11:39	35.55	51.37	28.32	36.85	83	00:11:30
00:11:40	35.57	51.66	28.33	36.87	80	00:11:31
00:11:41	35.55	51.72	28.34	36.85	78	00:11:32
00:11:42	35.56	51.85	28.34	36.86	76	00:11:33
00:11:43	35.55	52.05	28.35	36.85	74	00:11:34
00:11:44	35.54	51.85	28.34	36.84	73	00:11:35
00:11:45	35.52	51.21	28.35	36.82	72	00:11:36
00:11:46	35.53	51.15	28.36	36.83	72	00:11:37
00:11:47	35.52	51.12	28.38	36.82	74	00:11:38
00:11:48	35.52	51.18	28.4	36.82	76	00:11:39
00:11:49	35.52	50.92	28.39	36.82	80	00:11:40
00:11:50	35.52	49.88	28.39	36.82	82	00:11:41
00:11:51	35.51	49.23	28.39	36.81	83	00:11:42
00:11:52	35.5	48.97	28.4	36.8	83	00:11:43
00:11:53	35.5	48.87	28.4	36.8	82	00:11:44
00:11:54	35.5	48.74	28.39	36.8	82	00:11:45
00:11:55	35.49	48.68	28.4	36.79	83	00:11:46
00:11:56	35.5	48.68	28.41	36.8	79	00:11:47
00:11:57	35.51	48.81	28.42	36.81	75	00:11:48
00:11:58	35.51	49.3	28.42	36.81	72	00:11:49
00:11:59	35.5	49.46	28.42	36.8	71	00:11:50
00:12:00	35.5	49.4	28.42	36.8	71	00:11:51
00:12:01	35.49	49.6	28.44	36.79	71	00:11:52
00:12:02	35.5	49.73	28.44	36.8	74	00:11:53
00:12:03	35.49	49.66	28.45	36.79	76	00:11:54
00:12:04	35.5	49.7	28.45	36.8	76	00:11:55
00:12:05	35.51	49.89	28.47	36.81	75	00:11:56
00:12:06	35.5	49.99	28.47	36.8	73	00:11:57
00:12:07	35.48	50.06	28.48	36.78	74	00:11:58
00:12:08	35.48	50.25	28.48	36.78	75	00:11:59
00:12:09	35.47	50.13	28.5	36.77	76	00:12:00
00:12:10	35.47	49.67	28.5	36.77	76	00:12:01
00:12:11	35.48	49.15	28.5	36.78	76	00:12:02
00:12:12	35.49	49.08	28.5	36.79	75	00:12:03
00:12:13	35.5	49.34	28.52	36.8	75	00:12:04
00:12:14	35.5	49.8	28.51	36.8	75	00:12:05
00:12:15	35.49	50.19	28.53	36.79	76	00:12:06
00:12:16	35.48	50.36	28.52	36.78	78	00:12:07
00:12:17	35.48	50.26	28.53	36.78	79	00:12:08
00:12:18	35.47	50.16	28.54	36.77	77	00:12:09
00:12:19	35.47	50	28.54	36.77	74	00:12:10
00:12:20	35.47	49.93	28.54	36.77	71	00:12:11
00:12:21	35.48	49.87	28.54	36.78	69	00:12:12
00:12:22	35.47	49.87	28.54	36.77	67	00:12:13
00:12:23	35.47	49.74	28.55	36.77	67	00:12:14
00:12:24	35.47	49.45	28.55	36.77	68	00:12:15
00:12:25	35.47	49.32	28.56	36.77	69	00:12:16
00:12:26	35.46	49.42	28.58	36.76	71	00:12:17
00:12:27	35.46	49.45	28.58	36.76	75	00:12:18
00:12:28	35.47	49.35	28.59	36.77	78	00:12:19
00:12:29	35.48	49.03	28.59	36.78	81	00:12:20
00:12:31	35.48	48.47	28.55	36.78	81	00:12:21
00:12:32	35.48	48.96	28.59	36.78	76	00:12:22
00:12:33	35.48	49.39	28.61	36.78	72	00:12:23
00:12:34	35.47	49.52	28.61	36.77	69	00:12:24
00:12:35	35.47	49.72	28.62	36.77	68	00:12:25
00:12:36	35.48	49.72	28.63	36.78	69	00:12:26
00:12:37	35.48	49.36	28.62	36.78	70	00:12:27
00:12:38	35.47	48.77	28.63	36.77	72	00:12:28
00:12:39	35.47	48.71	28.65	36.77	72	00:12:29
00:12:40	35.47	48.91	28.65	36.77	74	00:12:30
00:12:41	35.47	49.1	28.66	36.77	76	00:12:31
00:12:42	35.47	49.3	28.65	36.77	79	00:12:32
00:12:43	35.47	49.43	28.66	36.77	80	00:12:33
00:12:44	35.47	49.53	28.66	36.77	81	00:12:34
00:12:45	35.48	49.63	28.66	36.78	81	00:12:35
00:12:46	35.47	49.59	28.68	36.77	81	00:12:36
00:12:47	35.46	49.3	28.69	36.76	80	00:12:37
00:12:48	35.47	48.91	28.68	36.77	78	00:12:38
00:12:49	35.48	48.65	28.68	36.78	76	00:12:39
00:12:50	35.47	48.85	28.7	36.77	74	00:12:40
00:12:51	35.47	48.98	28.7	36.77	73	00:12:41
00:12:52	35.48	48.95	28.71	36.78	74	00:12:42
00:12:53	35.47	48.91	28.71	36.77	77	00:12:43
00:12:54	35.47	48.91	28.73	36.77	80	00:12:44
00:12:55	35.47	48.92	28.73	36.77	82	00:12:45
00:12:56	35.47	48.85	28.73	36.77	82	00:12:46
00:12:57	35.47	48.72	28.74	36.77	80	00:12:47
00:12:58	35.48	48.62	28.74	36.78	75	00:12:48
00:12:59	35.47	48.52	28.74	36.77	71	00:12:49
00:13:00	35.47	48.52	28.75	36.77	68	00:12:50
00:13:01	35.47	48.62	28.76	36.77	67	00:12:51
00:13:02	35.46	48.53	28.76	36.76	66	00:12:52
00:13:03	35.46	48.62	28.76	36.76	67	00:12:53
00:13:04	35.46	48.79	28.76	36.76	68	00:12:54
00:13:05	35.45	48.89	28.78	36.75	70	00:12:55
00:13:06	35.45	48.99	28.78	36.75	72	00:12:56
00:13:07	35.45	49.12	28.79	36.75	76	00:12:57
00:13:08	35.45	48.99	28.79	36.75	79	00:12:58
00:13:09	35.45	48.96	28.78	36.75	82	00:12:59
00:13:10	35.47	49.18	28.78	36.77	82	00:13:00
00:13:11	35.47	49.45	28.8	36.77	78	00:13:01
00:13:12	35.47	49.48	28.81	36.77	74	00:13:02
00:13:13	35.47	49.45	28.81	36.77	70	00:13:03
00:13:14	35.47	49.29	28.81	36.77	69	00:13:04
00:13:15	35.46	49.42	28.82	36.76	72	00:13:05
00:13:16	35.46	49.52	28.82	36.76	74	00:13:06
00:13:17	35.46	49.06	28.83	36.76	76	00:13:07
00:13:18	35.46	48.34	28.84	36.76	76	00:13:08
00:13:19	35.46	47.52	28.83	36.76	77	00:13:09
00:13:20	35.46	47.02	28.84	36.76	77	00:13:10
00:13:21	35.46	47.52	28.85	36.76	77	00:13:11
00:13:22	35.46	47.95	28.85	36.76	76	00:13:12
00:13:23	35.46	48.21	28.86	36.76	76	00:13:13
00:13:24	35.46	48.08	28.87	36.76	76	00:13:14
00:13:25	35.46	47.32	28.87	36.76	77	00:13:15
00:13:26	35.46	46.36	28.87	36.76	78	00:13:16
00:13:27	35.46	45.29	28.87	36.76	77	00:13:17
00:13:28	35.46	44.63	28.87	36.76	76	00:13:18
00:13:29	35.46	43.96	28.86	36.76	75	00:13:19
00:13:30	35.46	43.42	28.86	36.76	75	00:13:20
00:13:31	35.47	43.42	28.87	36.77	77	00:13:21
00:13:32	35.47	43.28	28.87	36.77	80	00:13:22
00:13:33	35.47	43.15	28.87	36.77	83	00:13:23
00:13:34	35.47	42.68	28.87	36.77	84	00:13:24
00:13:35	35.47	42.41	28.86	36.77	86	00:13:25
00:13:36	35.46	42.57	28.86	36.76	87	00:13:26
00:13:37	35.46	42.85	28.88	36.76	88	00:13:27
00:13:38	35.45	43.28	28.88	36.75	89	00:13:28
00:13:39	35.45	43.92	28.89	36.75	90	00:13:29
00:13:40	35.45	44.09	28.89	36.75	89	00:13:30
00:13:41	35.45	43.92	28.89	36.75	89	00:13:31
00:13:42	35.44	43.82	28.88	36.74	89	00:13:32
00:13:43	35.45	43.82	28.89	36.75	89	00:13:33
00:13:44	35.44	43.69	28.88	36.74	90	00:13:34
00:13:45	35.43	43.69	28.9	36.73	92	00:13:35
00:13:46	35.41	43.52	28.9	36.71	93	00:13:36
00:13:47	35.4	43.35	28.89	36.7	94	00:13:37
00:13:48	35.38	42.68	28.89	36.68	95	00:13:38
00:13:49	35.38	41.96	28.88	36.68	94	00:13:39
00:13:50	35.36	41.49	28.89	36.66	95	00:13:40
00:13:51	35.35	41.25	28.89	36.65	94	00:13:41
00:13:52	35.35	41.08	28.87	36.65	94	00:13:42
00:13:53	35.35	41.25	28.87	36.65	94	00:13:43
00:13:54	35.34	41.32	28.88	36.64	94	00:13:44
00:13:55	35.32	41.01	28.88	36.62	93	00:13:45
00:13:56	35.31	40.64	28.87	36.61	90	00:13:46
00:13:57	35.28	40.4	28.88	36.58	92	00:13:47
00:13:58	35.26	40.3	28.87	36.56	94	00:13:48
00:13:59	35.24	40.23	28.86	36.54	96	00:13:49
00:14:00	35.23	40.12	28.87	36.53	96	00:13:50
00:14:01	35.22	40.4	28.88	36.52	96	00:13:51
00:14:02	35.21	40.5	28.88	36.51	97	00:13:52
00:14:03	35.19	40.57	28.88	36.49	97	00:13:53
00:14:04	35.17	40.3	28.89	36.47	98	00:13:54
00:14:05	35.16	40.16	28.88	36.46	98	00:13:55
00:14:06	35.15	40.78	28.88	36.45	98	00:13:56
00:14:07	35.14	41.97	28.9	36.44	98	00:13:57
00:14:08	35.13	42.47	28.9	36.43	99	00:13:58
00:14:09	35.13	42.37	28.9	36.43	98	00:13:59
00:14:10	35.12	42.2	28.89	36.42	96	00:14:00
00:14:11	35.11	41.76	28.9	36.41	95	00:14:01
00:14:12	35.1	41.49	28.9	36.4	95	00:14:02
00:14:13	35.09	41.32	28.91	36.39	96	00:14:03
00:14:14	35.07	41.19	28.9	36.37	97	00:14:04
00:14:15	35.05	41.25	28.9	36.35	98	00:14:05
00:14:16	35.04	41.9	28.9	36.34	99	00:14:06
00:14:17	35.03	42.41	28.91	36.33	100	00:14:07
00:14:18	35.02	41.97	28.9	36.32	101	00:14:08
00:14:19	35.02	41.25	28.9	36.32	102	00:14:09
00:14:20	35.01	40.91	28.9	36.31	102	00:14:10
00:14:21	35.01	40.78	28.9	36.31	103	00:14:11
00:14:22	35	40.67	28.88	36.3	103	00:14:12
00:14:23	34.99	40.5	28.88	36.29	103	00:14:13
00:14:24	34.98	40.16	28.88	36.28	103	00:14:14
00:14:25	34.97	39.85	28.88	36.27	99	00:14:15
00:14:26	34.95	39.47	28.87	36.25	100	00:14:16
00:14:27	34.94	39.2	28.87	36.24	101	00:14:17
00:14:28	34.92	38.92	28.86	36.22	102	00:14:18
00:14:29	34.92	38.71	28.85	36.22	102	00:14:19
00:14:30	34.91	38.61	28.85	36.21	103	00:14:20
00:14:31	34.91	38.47	28.84	36.21	103	00:14:21
00:14:32	34.89	38.3	28.84	36.19	103	00:14:22
00:14:33	34.88	38.33	28.84	36.18	103	00:14:23
00:14:34	34.86	38.16	28.84	36.16	104	00:14:24
00:14:35	34.84	38.02	28.83	36.14	103	00:14:25
00:14:36	34.83	37.95	28.81	36.13	104	00:14:26
00:14:37	34.82	37.78	28.82	36.12	103	00:14:27
00:14:38	34.8	37.67	28.8	36.1	104	00:14:28
00:14:39	34.78	37.6	28.81	36.08	104	00:14:29
00:14:40	34.77	37.5	28.8	36.07	103	00:14:30
00:14:41	34.76	37.33	28.8	36.06	103	00:14:31
00:14:42	34.75	37.12	28.8	36.05	103	00:14:32
00:14:43	34.74	37.05	28.8	36.04	104	00:14:33
00:14:44	34.72	37.29	28.79	36.02	104	00:14:34
00:14:45	34.71	37.88	28.81	36.01	104	00:14:35
00:14:46	34.69	38.3	28.8	35.99	99	00:14:36
00:14:47	34.68	38.47	28.81	35.98	100	00:14:37
00:14:48	34.67	38.61	28.81	35.97	100	00:14:38
00:14:49	34.66	39.12	28.82	35.96	100	00:14:39
00:14:50	34.63	39.64	28.83	35.93	100	00:14:40
00:14:51	34.61	39.85	28.82	35.91	100	00:14:41
00:14:52	34.6	40.05	28.83	35.9	99	00:14:42
00:14:53	34.58	39.95	28.82	35.88	99	00:14:43
00:14:54	34.56	39.88	28.82	35.86	99	00:14:44
00:14:55	34.55	40.73	28.82	35.85	99	00:14:45
00:14:56	34.53	41.82	28.83	35.83	99	00:14:46
00:14:57	34.52	43.08	28.84	35.82	98	00:14:47
00:14:58	34.51	43.92	28.84	35.81	96	00:14:48
00:14:59	34.49	44.22	28.83	35.79	93	00:14:49
00:15:00	34.47	43.89	28.85	35.77	92	00:14:50
00:15:01	34.46	43.52	28.84	35.76	91	00:14:51
00:15:02	34.44	43.11	28.84	35.74	92	00:14:52
00:15:03	34.43	42.33	28.85	35.73	93	00:14:53
00:15:04	34.42	41.52	28.84	35.72	95	00:14:54
00:15:05	34.41	41.59	28.86	35.71	97	00:14:55
00:15:06	34.4	42	28.86	35.7	96	00:14:56
00:15:07	34.4	42.27	28.85	35.7	90	00:14:57
00:15:08	34.4	42.27	28.85	35.7	85	00:14:58
00:15:09	34.4	42.61	28.87	35.7	81	00:14:59
00:15:10	34.39	42.78	28.86	35.69	78	00:15:00
00:15:11	34.38	42.78	28.85	35.68	78	00:15:01
00:15:12	34.38	42.67	28.87	35.68	79	00:15:02
00:15:13	34.37	42.61	28.85	35.67	81	00:15:03
00:15:14	34.36	43.05	28.86	35.66	83	00:15:04
00:15:15	34.35	43.65	28.87	35.65	84	00:15:05
00:15:16	34.34	44.29	28.85	35.64	85	00:15:06
00:15:17	34.33	44.46	28.86	35.63	85	00:15:07
00:15:18	34.32	44.22	28.87	35.62	87	00:15:08
00:15:19	34.3	44.12	28.86	35.6	88	00:15:09
00:15:20	34.31	43.82	28.86	35.61	90	00:15:10
00:15:22	34.33	42.47	28.81	35.63	92	00:15:11
00:15:23	34.34	42.47	28.83	35.64	93	00:15:12
00:15:24	34.36	42.81	28.84	35.66	92	00:15:13
00:15:25	34.36	42.94	28.85	35.66	88	00:15:14
00:15:26	34.35	42.47	28.85	35.65	83	00:15:15
00:15:27	34.33	42	28.84	35.63	79	00:15:16
00:15:28	34.32	41.52	28.84	35.62	76	00:15:17
00:15:29	34.31	40.98	28.84	35.61	76	00:15:18
00:15:30	34.3	40.39	28.83	35.6	79	00:15:19
00:15:31	34.3	40.09	28.82	35.6	81	00:15:20
00:15:32	34.31	40.39	28.83	35.61	82	00:15:21
00:15:33	34.31	40.91	28.83	35.61	88	00:15:22
00:15:34	34.31	41.21	28.83	35.61	94	00:15:23
00:15:35	34.31	41.48	28.84	35.61	97	00:15:24
00:15:36	34.31	41.59	28.84	35.61	94	00:15:25
00:15:37	34.3	41.52	28.85	35.6	95	00:15:26
00:15:38	34.3	41.49	28.84	35.6	96	00:15:27
00:15:39	34.29	41.66	28.85	35.59	98	00:15:28
00:15:40	34.27	42	28.86	35.57	98	00:15:29
00:15:41	34.26	42.4	28.88	35.56	98	00:15:30
00:15:42	34.26	42.4	28.86	35.56	93	00:15:31
00:15:43	34.25	42.2	28.87	35.55	88	00:15:32
00:15:44	34.25	42.13	28.87	35.55	86	00:15:33
00:15:45	34.26	42.13	28.87	35.56	85	00:15:34
00:15:46	34.26	41.66	28.86	35.56	86	00:15:35
00:15:47	34.26	41.45	28.86	35.56	86	00:15:36
00:15:48	34.26	41.32	28.86	35.56	86	00:15:37
00:15:49	34.26	41.22	28.86	35.56	86	00:15:38
00:15:50	34.26	41.32	28.86	35.56	87	00:15:39
00:15:51	34.26	41.25	28.87	35.56	88	00:15:40
00:15:52	34.25	41.35	28.87	35.55	89	00:15:41
00:15:53	34.26	41.45	28.88	35.56	90	00:15:42
00:15:54	34.26	41.59	28.87	35.56	90	00:15:43
00:15:55	34.26	41.93	28.88	35.56	89	00:15:44
00:15:56	34.26	42.41	28.89	35.56	89	00:15:45
00:15:57	34.27	42.64	28.89	35.57	88	00:15:46
00:15:58	34.27	42.47	28.87	35.57	86	00:15:47
00:15:59	34.27	42.37	28.89	35.57	85	00:15:48
00:16:00	34.27	42.14	28.88	35.57	85	00:15:49
00:16:01	34.26	41.66	28.88	35.56	82	00:15:50
00:16:02	34.25	41.25	28.88	35.55	79	00:15:51
00:16:03	34.24	41.01	28.87	35.54	78	00:15:52
00:16:04	34.23	40.91	28.89	35.53	77	00:15:53
00:16:05	34.22	40.71	28.89	35.52	86	00:15:54
00:16:06	34.22	40.81	28.88	35.52	91	00:15:55
00:16:07	34.23	41.25	28.9	35.53	94	00:15:56
00:16:08	34.23	41.83	28.9	35.53	95	00:15:57
00:16:09	34.24	42.41	28.9	35.54	97	00:15:58
00:16:10	34.25	42.74	28.9	35.55	97	00:15:59
00:16:11	34.26	42.95	28.9	35.56	96	00:16:00
00:16:12	34.26	42.92	28.92	35.56	96	00:16:01
00:16:13	34.27	42.75	28.92	35.57	97	00:16:02
00:16:14	34.26	42.68	28.91	35.56	98	00:16:03
00:16:15	34.25	42.2	28.9	35.55	95	00:16:04
00:16:16	34.24	41.87	28.9	35.54	92	00:16:05
00:16:17	34.23	42.14	28.91	35.53	88	00:16:06
00:16:18	34.22	42.51	28.92	35.52	83	00:16:07
00:16:19	34.22	42.78	28.91	35.52	83	00:16:08
00:16:20	34.23	42.95	28.92	35.53	86	00:16:09
00:16:21	34.23	42.95	28.93	35.53	88	00:16:10
00:16:22	34.24	42.85	28.93	35.54	92	00:16:11
00:16:23	34.24	42.27	28.92	35.54	93	00:16:12
00:16:24	34.25	41.7	28.92	35.55	93	00:16:13
00:16:25	34.24	41.56	28.92	35.54	92	00:16:14
00:16:26	34.25	41.94	28.91	35.55	89	00:16:15
00:16:27	34.25	42.11	28.92	35.55	91	00:16:16
00:16:28	34.26	42	28.92	35.56	91	00:16:17
00:16:29	34.26	41.66	28.92	35.56	93	00:16:18
00:16:30	34.26	41.26	28.92	35.56	95	00:16:19
00:16:31	34.26	41.02	28.94	35.56	95	00:16:20
00:16:32	34.24	41.26	28.93	35.54	95	00:16:21
00:16:33	34.24	41.67	28.94	35.54	96	00:16:22
00:16:34	34.24	42	28.95	35.54	94	00:16:23
00:16:35	34.25	41.73	28.93	35.55	94	00:16:24
00:16:36	34.25	41.33	28.93	35.55	93	00:16:25
00:16:37	34.27	40.98	28.95	35.57	94	00:16:26
00:16:38	34.27	41.39	28.95	35.57	95	00:16:27
00:16:39	34.27	41.97	28.96	35.57	96	00:16:28
00:16:40	34.27	42.28	28.96	35.57	95	00:16:29
00:16:41	34.27	42.45	28.97	35.57	96	00:16:30
00:16:42	34.26	42.35	28.96	35.56	96	00:16:31
00:16:43	34.25	42.38	28.95	35.55	96	00:16:32
00:16:44	34.25	42.45	28.95	35.55	95	00:16:33
00:16:45	34.24	42.55	28.95	35.54	94	00:16:34
00:16:46	34.24	42.69	28.96	35.54	92	00:16:35
00:16:47	34.24	42.69	28.96	35.54	88	00:16:36
00:16:48	34.25	42.59	28.97	35.55	86	00:16:37
00:16:49	34.25	42.21	28.96	35.55	85	00:16:38
00:16:50	34.26	42.28	28.96	35.56	84	00:16:39
00:16:51	34.26	42.86	28.96	35.56	83	00:16:40
00:16:52	34.27	43.5	28.96	35.57	81	00:16:41
00:16:53	34.26	43.16	28.97	35.56	82	00:16:42
00:16:54	34.25	42.38	28.98	35.55	84	00:16:43
00:16:55	34.25	41.74	28.98	35.55	87	00:16:44
00:16:56	34.25	41.53	28.98	35.55	91	00:16:45
00:16:57	34.24	41.54	28.98	35.54	92	00:16:46
00:16:58	34.24	41.67	29	35.54	92	00:16:47
00:16:59	34.24	41.91	29	35.54	89	00:16:48
00:17:00	34.23	42.01	29	35.53	87	00:16:49
00:17:02	34.22	42.11	28.95	35.52	84	00:16:50
00:17:03	34.22	42.01	28.97	35.52	84	00:16:51
00:17:04	34.22	41.53	28.99	35.52	84	00:16:52
00:17:05	34.22	40.99	28.99	35.52	85	00:16:53
00:17:06	34.21	40.72	28.99	35.51	85	00:16:54
00:17:07	34.21	40.55	28.98	35.51	87	00:16:55
00:17:08	34.21	40.51	28.98	35.51	88	00:16:56
00:17:09	34.21	40.51	28.99	35.51	88	00:16:57
00:17:10	34.21	40.44	29	35.51	88	00:16:58
00:17:11	34.21	40.38	28.99	35.51	88	00:16:59
00:17:12	34.19	40.21	29	35.49	89	00:17:00
00:17:13	34.17	40.07	29	35.47	90	00:17:01
00:17:14	34.15	39.97	29	35.45	90	00:17:02
00:17:16	34.13	39.79	28.95	35.43	91	00:17:03
00:17:17	34.13	39.62	28.97	35.43	92	00:17:04
00:17:18	34.12	39.52	28.98	35.42	93	00:17:05
00:17:19	34.12	39.28	28.98	35.42	93	00:17:06
00:17:20	34.11	39.18	28.99	35.41	93	00:17:07
00:17:21	34.12	39.21	29	35.42	93	00:17:08
00:17:22	34.12	39.28	28.98	35.42	93	00:17:09
00:17:23	34.13	39.31	29	35.43	93	00:17:10
00:17:24	34.13	39.45	29	35.43	93	00:17:11
00:17:25	34.14	39.49	29	35.44	94	00:17:12
00:17:26	34.14	39.49	29	35.44	95	00:17:13
00:17:27	34.14	39.35	29	35.44	95	00:17:14
00:17:28	34.13	39.14	28.99	35.43	95	00:17:15
00:17:29	34.11	39.07	28.99	35.41	96	00:17:16
00:17:30	34.1	38.97	28.99	35.4	95	00:17:17
00:17:31	34.09	38.8	28.99	35.39	95	00:17:18
00:17:32	34.08	38.69	28.98	35.38	96	00:17:19
00:17:33	34.08	38.59	28.98	35.38	96	00:17:20
00:17:34	34.08	38.52	28.97	35.38	97	00:17:21
00:17:35	34.08	38.52	28.98	35.38	97	00:17:22
00:17:36	34.08	38.66	28.98	35.38	97	00:17:23
00:17:37	34.06	38.8	28.98	35.36	97	00:17:24
00:17:38	34.06	38.73	28.99	35.36	97	00:17:25
00:17:39	34.06	38.66	28.98	35.36	98	00:17:26
00:17:40	34.05	38.59	28.98	35.35	97	00:17:27
00:17:41	34.04	38.45	28.97	35.34	98	00:17:28
00:17:42	34.05	38.31	28.97	35.35	98	00:17:29
00:17:43	34.05	38.1	28.97	35.35	98	00:17:30
00:17:44	34.05	37.97	28.97	35.35	98	00:17:31
00:17:45	34.04	38.07	28.98	35.34	99	00:17:32
00:17:46	34.03	38.04	28.98	35.33	99	00:17:33
00:17:47	34.02	38.04	28.98	35.32	99	00:17:34
00:17:48	34.01	38.07	28.98	35.31	99	00:17:35
00:17:49	33.99	38.04	28.99	35.29	99	00:17:36
00:17:50	33.99	38.04	28.97	35.29	99	00:17:37
00:17:51	33.98	37.97	28.97	35.28	98	00:17:38
00:17:52	33.98	38	28.97	35.28	97	00:17:39
00:17:53	33.98	37.97	28.97	35.28	96	00:17:40
00:17:54	33.97	37.72	28.95	35.27	95	00:17:41
00:17:55	33.96	37.83	28.95	35.26	95	00:17:42
00:17:56	33.96	38.03	28.96	35.26	95	00:17:43
00:17:57	33.96	38.38	28.97	35.26	96	00:17:44
00:17:58	33.95	38.38	28.96	35.25	95	00:17:45
00:17:59	33.96	38.38	28.96	35.26	94	00:17:46
00:18:00	33.96	38.28	28.96	35.26	97	00:17:47
00:18:01	33.94	38.03	28.95	35.24	99	00:17:48
00:18:02	33.93	38.1	28.97	35.23	100	00:17:49
00:18:03	33.91	38.17	28.95	35.21	100	00:17:50
00:18:04	33.9	38.1	28.96	35.2	100	00:17:51
00:18:05	33.9	37.93	28.95	35.2	100	00:17:52
00:18:06	33.9	37.72	28.95	35.2	99	00:17:53
00:18:07	33.9	37.62	28.96	35.2	100	00:17:54
00:18:08	33.9	37.51	28.95	35.2	101	00:17:55
00:18:10	33.89	37.62	28.92	35.19	101	00:17:56
00:18:11	33.89	37.55	28.93	35.19	101	00:17:57
00:18:12	33.88	37.72	28.94	35.18	101	00:17:58
00:18:13	33.87	37.96	28.94	35.17	101	00:17:59
00:18:14	33.86	37.89	28.94	35.16	100	00:18:00
00:18:15	33.86	37.79	28.94	35.16	101	00:18:01
00:18:16	33.86	38.1	28.93	35.16	100	00:18:02
00:18:17	33.85	38.45	28.94	35.15	100	00:18:03
00:18:18	33.85	38.65	28.93	35.15	101	00:18:04
00:18:19	33.84	38.69	28.94	35.14	101	00:18:05
00:18:20	33.84	38.69	28.94	35.14	100	00:18:06
00:18:21	33.83	38.9	28.94	35.13	99	00:18:07
00:18:22	33.83	39.07	28.94	35.13	99	00:18:08
00:18:23	33.82	39.14	28.94	35.12	95	00:18:09
00:18:24	33.82	39.21	28.94	35.12	93	00:18:10
00:18:25	33.82	39.48	28.95	35.12	94	00:18:11
00:18:26	33.82	39.65	28.96	35.12	96	00:18:12
00:18:27	33.82	39.96	28.96	35.12	96	00:18:13
00:18:28	33.82	40.37	28.96	35.12	96	00:18:14
00:18:29	33.8	40.61	28.97	35.1	96	00:18:15
00:18:30	33.79	40.68	28.97	35.09	96	00:18:16
00:18:31	33.78	40.78	28.97	35.08	95	00:18:17
00:18:32	33.77	40.85	28.97	35.07	95	00:18:18
00:18:33	33.76	40.92	28.98	35.06	95	00:18:19
00:18:34	33.76	40.92	28.96	35.06	96	00:18:20
00:18:35	33.75	40.95	28.98	35.05	97	00:18:21
00:18:36	33.74	40.99	28.98	35.04	96	00:18:22
00:18:37	33.74	40.89	28.97	35.04	95	00:18:23
00:18:38	33.75	40.85	28.98	35.05	91	00:18:24
00:18:39	33.76	40.85	28.98	35.06	89	00:18:25
00:18:40	33.77	40.99	28.98	35.07	89	00:18:26
00:18:41	33.77	41.47	28.99	35.07	90	00:18:27
00:18:42	33.76	41.88	28.99	35.06	90	00:18:28
00:18:43	33.75	42.15	29	35.05	92	00:18:29
00:18:44	33.75	42.35	29.01	35.05	93	00:18:30
00:18:45	33.74	42.49	29	35.04	95	00:18:31
00:18:46	33.74	42.28	29	35.04	96	00:18:32
00:18:47	33.75	42.11	29.01	35.05	96	00:18:33
00:18:48	33.76	42.22	29	35.06	96	00:18:34
00:18:49	33.76	42.42	29.01	35.06	93	00:18:35
00:18:50	33.76	42.59	29	35.06	95	00:18:36
00:18:51	33.76	42.83	29.01	35.06	94	00:18:37
00:18:52	33.76	43.03	29.02	35.06	91	00:18:38
00:18:53	33.76	43	29.02	35.06	88	00:18:39
00:18:55	33.78	42.93	28.98	35.08	79	00:18:40
00:18:56	33.78	42.89	29.02	35.08	79	00:18:41
00:18:57	33.79	42.96	29.02	35.09	82	00:18:42
00:18:58	33.8	42.96	29.02	35.1	87	00:18:43
00:18:59	33.81	42.93	29.02	35.11	89	00:18:44
00:19:00	33.81	43.1	29.03	35.11	90	00:18:45
00:19:01	33.82	43.23	29.02	35.12	89	00:18:46
00:19:02	33.81	43.34	29.03	35.11	89	00:18:47
00:19:03	33.81	43.37	29.04	35.11	89	00:18:48
00:19:04	33.8	43.37	29.04	35.1	88	00:18:49
00:19:05	33.8	43.37	29.05	35.1	86	00:18:50
00:19:06	33.78	43.3	29.04	35.08	83	00:18:51
00:19:07	33.79	43.34	29.04	35.09	81	00:18:52
00:19:08	33.78	43.44	29.06	35.08	80	00:18:53
00:19:09	33.78	43.57	29.06	35.08	78	00:18:54
00:19:10	33.78	43.3	29.05	35.08	77	00:18:55
00:19:11	33.8	43.1	29.05	35.1	77	00:18:56
00:19:12	33.8	43.03	29.05	35.1	76	00:18:57
00:19:13	33.82	43.1	29.04	35.12	76	00:18:58
00:19:14	33.83	43.37	29.06	35.13	77	00:18:59
00:19:15	33.85	43.34	29.06	35.15	77	00:19:00
00:19:16	33.87	43.31	29.07	35.17	78	00:19:01
00:19:17	33.89	43.51	29.07	35.19	79	00:19:02
00:19:18	33.91	43.78	29.07	35.21	79	00:19:03
00:19:19	33.91	43.98	29.08	35.21	79	00:19:04
00:19:20	33.92	43.81	29.08	35.22	78	00:19:05
00:19:21	33.92	43.61	29.09	35.22	77	00:19:06
00:19:22	33.92	43.31	29.08	35.22	76	00:19:07
00:19:23	33.91	43.21	29.07	35.21	75	00:19:08
00:19:24	33.92	43.44	29.09	35.22	76	00:19:09
00:19:25	33.93	43.68	29.1	35.23	77	00:19:10
00:19:26	33.94	43.78	29.1	35.24	77	00:19:11
00:19:27	33.95	43.68	29.1	35.25	77	00:19:12
00:19:28	33.96	43.44	29.1	35.26	76	00:19:13
00:19:29	33.96	43.17	29.1	35.26	75	00:19:14
00:19:30	33.96	43.04	29.1	35.26	74	00:19:15
00:19:31	33.97	43.04	29.11	35.27	74	00:19:16
00:19:32	33.97	43.11	29.1	35.27	74	00:19:17
00:19:33	33.98	43.31	29.1	35.28	78	00:19:18
00:19:34	33.98	43.48	29.12	35.28	81	00:19:19
00:19:35	33.99	43.71	29.11	35.29	82	00:19:20
00:19:36	33.99	43.98	29.11	35.29	81	00:19:21
00:19:37	33.99	44.05	29.12	35.29	78	00:19:22
00:19:38	33.99	44.05	29.12	35.29	77	00:19:23
00:19:39	33.99	44.05	29.13	35.29	76	00:19:24
00:19:40	33.99	44.12	29.12	35.29	78	00:19:25
00:19:41	33.99	44.22	29.13	35.29	79	00:19:26
00:19:42	34.01	44.66	29.15	35.31	79	00:19:27
00:19:43	34.01	45.03	29.15	35.31	79	00:19:28
00:19:44	34.01	45.23	29.15	35.31	76	00:19:29
00:19:45	34.01	45.53	29.14	35.31	74	00:19:30
00:19:46	34.01	46	29.16	35.31	74	00:19:31
00:19:47	34	46.4	29.16	35.3	75	00:19:32
00:19:48	34	46.73	29.17	35.3	78	00:19:33
00:19:49	34	46.46	29.16	35.3	81	00:19:34
00:19:50	34.01	46	29.17	35.31	83	00:19:35
00:19:51	34.01	45.53	29.17	35.31	82	00:19:36
00:19:52	34.01	45.23	29.18	35.31	81	00:19:37
00:19:53	34.01	44.96	29.17	35.31	78	00:19:38
00:19:54	34.01	44.83	29.18	35.31	75	00:19:39
00:19:55	34.01	44.93	29.19	35.31	71	00:19:40
00:19:56	34.01	45.2	29.19	35.31	69	00:19:41
00:19:57	34.02	45.47	29.19	35.32	67	00:19:42
00:19:58	34.02	45.7	29.18	35.32	67	00:19:43
00:19:59	34.03	45.87	29.19	35.33	68	00:19:44
00:20:00	34.03	45.97	29.19	35.33	69	00:19:45
00:20:01	34.04	46.07	29.2	35.34	69	00:19:46
00:20:02	34.04	46.23	29.21	35.34	71	00:19:47
00:20:03	34.05	46.33	29.21	35.35	74	00:19:48
00:20:04	34.05	46.44	29.21	35.35	76	00:19:49
00:20:05	34.04	46.5	29.22	35.34	79	00:19:50
00:20:06	34.03	46.54	29.22	35.33	81	00:19:51
00:20:07	34.04	46.47	29.22	35.34	80	00:19:52
00:20:08	34.05	46.4	29.22	35.35	78	00:19:53
00:20:09	34.04	46.37	29.23	35.34	77	00:19:54
00:20:10	34.05	46.34	29.23	35.35	76	00:19:55
00:20:11	34.07	46.27	29.24	35.37	75	00:19:56
00:20:12	34.07	46.31	29.25	35.37	76	00:19:57
00:20:13	34.06	46.34	29.25	35.36	77	00:19:58
00:20:14	34.07	46.31	29.26	35.37	73	00:19:59
00:20:15	34.08	46.37	29.26	35.38	73	00:20:00
00:20:16	34.08	46.41	29.26	35.38	75	00:20:01
00:20:17	34.08	46.51	29.26	35.38	75	00:20:02
00:20:18	34.09	46.67	29.27	35.39	75	00:20:03
00:20:19	34.09	46.77	29.27	35.39	78	00:20:04
00:20:20	34.09	46.84	29.28	35.39	74	00:20:05
00:20:21	34.08	46.91	29.28	35.38	73	00:20:06
00:20:22	34.08	46.91	29.28	35.38	75	00:20:07
00:20:23	34.09	46.94	29.29	35.39	72	00:20:08
00:20:24	34.09	46.87	29.29	35.39	74	00:20:09
00:20:25	34.1	46.41	29.29	35.4	75	00:20:10
00:20:26	34.12	45.94	29.28	35.42	75	00:20:11
00:20:27	34.14	45.98	29.29	35.44	76	00:20:12
00:20:28	34.14	46.28	29.29	35.44	76	00:20:13
00:20:29	34.15	46.54	29.3	35.45	76	00:20:14
00:20:30	34.15	46.68	29.3	35.45	74	00:20:15
00:20:31	34.16	46.68	29.31	35.46	74	00:20:16
00:20:32	34.15	46.58	29.3	35.45	73	00:20:17
00:20:33	34.16	46.45	29.31	35.46	74	00:20:18
00:20:34	34.16	46.31	29.31	35.46	74	00:20:19
00:20:35	34.16	46.21	29.32	35.46	76	00:20:20
00:20:36	34.16	46.12	29.32	35.46	79	00:20:21
00:20:37	34.18	45.95	29.32	35.48	82	00:20:22
00:20:39	34.21	45.61	29.29	35.51	85	00:20:23
00:20:40	34.21	45.48	29.32	35.51	84	00:20:24
00:20:41	34.21	45.48	29.33	35.51	82	00:20:25
00:20:42	34.21	45.48	29.33	35.51	79	00:20:26
00:20:43	34.21	45.49	29.35	35.51	75	00:20:27
00:20:44	34.21	45.48	29.35	35.51	73	00:20:28
00:20:45	34.22	45.49	29.36	35.52	73	00:20:29
00:20:46	34.22	45.48	29.35	35.52	79	00:20:30
00:20:47	34.23	45.45	29.36	35.53	74	00:20:31
00:20:48	34.22	45.45	29.36	35.52	75	00:20:32
00:20:49	34.22	45.55	29.36	35.52	77	00:20:33
00:20:50	34.22	45.69	29.37	35.52	81	00:20:34
00:20:51	34.22	45.75	29.37	35.52	77	00:20:35
00:20:52	34.21	45.86	29.37	35.51	75	00:20:36
00:20:53	34.22	45.96	29.38	35.52	74	00:20:37
00:20:54	34.22	45.99	29.4	35.52	72	00:20:38
00:20:55	34.22	45.96	29.4	35.52	71	00:20:39
00:20:56	34.23	45.76	29.4	35.53	70	00:20:40
00:20:57	34.23	44.95	29.4	35.53	70	00:20:41
00:20:58	34.25	44.42	29.4	35.55	71	00:20:42
00:20:59	34.26	44.12	29.39	35.56	72	00:20:43
00:21:00	34.28	43.75	29.4	35.58	74	00:20:44
00:21:01	34.28	43.61	29.4	35.58	76	00:20:45
00:21:02	34.3	44.32	29.4	35.6	76	00:20:46
00:21:03	34.3	45.49	29.4	35.6	76	00:20:47
00:21:04	34.3	46.09	29.42	35.6	75	00:20:48
00:21:05	34.29	46.06	29.43	35.59	74	00:20:49
00:21:06	34.3	45.63	29.42	35.6	74	00:20:50
00:21:07	34.3	45.26	29.43	35.6	77	00:20:51
00:21:08	34.3	45.16	29.45	35.6	79	00:20:52
00:21:09	34.31	45.26	29.44	35.61	81	00:20:53
00:21:10	34.32	45.36	29.44	35.62	83	00:20:54
00:21:11	34.32	45.43	29.46	35.62	83	00:20:55
00:21:12	34.32	45.4	29.46	35.62	80	00:20:56
00:21:13	34.33	45.33	29.46	35.63	78	00:20:57
00:21:14	34.33	45.23	29.45	35.63	77	00:20:58
00:21:15	34.34	45.13	29.46	35.64	75	00:20:59
00:21:16	34.35	45.06	29.48	35.65	73	00:21:00
00:21:17	34.36	45.03	29.47	35.66	72	00:21:01
00:21:18	34.36	45	29.46	35.66	72	00:21:02
00:21:19	34.36	45	29.49	35.66	73	00:21:03
00:21:20	34.36	45.03	29.47	35.66	73	00:21:04
00:21:21	34.36	44.97	29.48	35.66	74	00:21:05
00:21:22	34.36	44.83	29.48	35.66	74	00:21:06
00:21:23	34.37	45.03	29.49	35.67	75	00:21:07
00:21:24	34.37	44.97	29.49	35.67	76	00:21:08
00:21:25	34.38	44.87	29.51	35.68	75	00:21:09
00:21:26	34.38	45.03	29.52	35.68	75	00:21:10
00:21:27	34.38	45.37	29.51	35.68	76	00:21:11
00:21:28	34.38	44.8	29.51	35.68	75	00:21:12
00:21:29	34.38	43.96	29.5	35.68	74	00:21:13
00:21:30	34.38	44.06	29.5	35.68	73	00:21:14
00:21:31	34.39	44.7	29.5	35.69	70	00:21:15
00:21:32	34.41	45.14	29.52	35.71	74	00:21:16
00:21:33	34.43	45.47	29.52	35.73	76	00:21:17
00:21:34	34.44	45.67	29.52	35.74	80	00:21:18
00:21:35	34.45	45.84	29.52	35.75	81	00:21:19
00:21:36	34.44	45.91	29.53	35.74	80	00:21:20
00:21:37	34.44	45.87	29.54	35.74	77	00:21:21
00:21:38	34.44	45.77	29.54	35.74	73	00:21:22
00:21:39	34.44	45.67	29.54	35.74	75	00:21:23
00:21:40	34.43	45.57	29.54	35.73	73	00:21:24
00:21:41	34.45	45.51	29.55	35.75	71	00:21:25
00:21:42	34.46	45.64	29.55	35.76	72	00:21:26
00:21:43	34.47	45.78	29.56	35.77	71	00:21:27
00:21:44	34.48	45.84	29.56	35.78	70	00:21:28
00:21:45	34.5	45.94	29.56	35.8	69	00:21:29
00:21:46	34.51	45.91	29.58	35.81	68	00:21:30
00:21:47	34.52	45.84	29.56	35.82	68	00:21:31
00:21:48	34.53	45.71	29.57	35.83	66	00:21:32
00:21:49	34.54	45.55	29.58	35.84	71	00:21:33
00:21:50	34.55	45.45	29.59	35.85	67	00:21:34
00:21:51	34.55	45.38	29.57	35.85	71	00:21:35
00:21:52	34.55	45.38	29.59	35.85	70	00:21:36
00:21:53	34.55	45.45	29.59	35.85	70	00:21:37
00:21:54	34.55	45.48	29.58	35.85	70	00:21:38
00:21:55	34.55	45.42	29.6	35.85	70	00:21:39
00:21:56	34.55	45.35	29.6	35.85	67	00:21:40
00:21:57	34.56	45.25	29.62	35.86	68	00:21:41
00:21:58	34.56	45.11	29.61	35.86	69	00:21:42
00:21:59	34.57	45.05	29.62	35.87	70	00:21:43
00:22:00	34.58	44.95	29.62	35.88	70	00:21:44
00:22:01	34.59	44.88	29.61	35.89	73	00:21:45
00:22:02	34.59	44.85	29.62	35.89	72	00:21:46
00:22:03	34.58	44.85	29.62	35.88	69	00:21:47
00:22:04	34.58	44.85	29.62	35.88	70	00:21:48
00:22:05	34.58	44.81	29.63	35.88	70	00:21:49
00:22:06	34.58	44.68	29.64	35.88	69	00:21:50
00:22:07	34.59	44.51	29.64	35.89	69	00:21:51
00:22:08	34.6	44.24	29.64	35.9	69	00:21:52
00:22:09	34.6	44.01	29.64	35.9	69	00:21:53
00:22:10	34.6	43.94	29.66	35.9	69	00:21:54
00:22:11	34.61	43.91	29.65	35.91	69	00:21:55
00:22:12	34.61	43.91	29.64	35.91	72	00:21:56
00:22:13	34.62	43.94	29.64	35.92	68	00:21:57
00:22:14	34.63	43.98	29.66	35.93	70	00:21:58
00:22:15	34.63	43.84	29.66	35.93	71	00:21:59
00:22:16	34.63	43.74	29.66	35.93	72	00:22:00
00:22:17	34.63	43.74	29.66	35.93	72	00:22:01
00:22:18	34.63	43.78	29.66	35.93	72	00:22:02
00:22:19	34.63	43.95	29.66	35.93	72	00:22:03
00:22:20	34.63	44.11	29.67	35.93	72	00:22:04
00:22:21	34.63	44.25	29.67	35.93	72	00:22:05
00:22:22	34.63	44.38	29.69	35.93	72	00:22:06
00:22:23	34.64	44.45	29.68	35.94	72	00:22:07
00:22:24	34.64	44.48	29.7	35.94	72	00:22:08
00:22:25	34.64	43.85	29.68	35.94	71	00:22:09
00:22:26	34.64	43.04	29.68	35.94	71	00:22:10
00:22:27	34.65	42.49	29.68	35.95	71	00:22:11
00:22:28	34.64	42.6	29.68	35.94	71	00:22:12
00:22:29	34.65	42.22	29.68	35.95	71	00:22:13
00:22:30	34.66	41.68	29.69	35.96	70	00:22:14
00:22:31	34.67	42.09	29.69	35.97	70	00:22:15
00:22:32	34.67	42.83	29.7	35.97	70	00:22:16
00:22:33	34.67	43.51	29.7	35.97	71	00:22:17
00:22:34	34.67	43.98	29.7	35.97	71	00:22:18
00:22:35	34.67	44.39	29.71	35.97	72	00:22:19
00:22:36	34.67	44.69	29.71	35.97	76	00:22:20
00:22:37	34.66	44.86	29.7	35.96	77	00:22:21
00:22:38	34.67	44.89	29.71	35.97	81	00:22:22
00:22:39	34.67	44.89	29.7	35.97	84	00:22:23
00:22:40	34.67	44.89	29.71	35.97	82	00:22:24
00:22:41	34.68	44.86	29.7	35.98	80	00:22:25
00:22:42	34.69	44.79	29.72	35.99	79	00:22:26
00:22:43	34.69	44.72	29.72	35.99	79	00:22:27
00:22:44	34.69	44.52	29.71	35.99	78	00:22:28
00:22:45	34.69	44.05	29.72	35.99	74	00:22:29
00:22:46	34.69	43.92	29.74	35.99	71	00:22:30
00:22:47	34.69	43.58	29.72	35.99	69	00:22:31
00:22:48	34.68	43.34	29.73	35.98	68	00:22:32
00:22:49	34.68	43.58	29.73	35.98	68	00:22:33
00:22:50	34.69	43.99	29.73	35.99	66	00:22:34
00:22:51	34.69	44.46	29.74	35.99	69	00:22:35
00:22:52	34.68	44.93	29.75	35.98	71	00:22:36
00:22:53	34.68	45.23	29.76	35.98	72	00:22:37
00:22:54	34.69	45.33	29.76	35.99	73	00:22:38
00:22:55	34.68	45.27	29.76	35.98	77	00:22:39
00:22:56	34.67	45.23	29.77	35.97	76	00:22:40
00:22:57	34.69	45.23	29.76	35.99	77	00:22:41
00:22:58	34.69	45.4	29.77	35.99	77	00:22:42
00:22:59	34.7	45.5	29.77	36	76	00:22:43
00:23:00	34.72	45.47	29.77	36.02	74	00:22:44
00:23:01	34.73	45.5	29.78	36.03	71	00:22:45
00:23:02	34.72	45.67	29.77	36.02	69	00:22:46
00:23:03	34.74	45.9	29.79	36.04	67	00:22:47
00:23:04	34.74	46	29.78	36.04	66	00:22:48
00:23:05	34.74	46.07	29.79	36.04	64	00:22:49
00:23:06	34.75	46.04	29.79	36.05	70	00:22:50
00:23:07	34.75	45.94	29.79	36.05	72	00:22:51
00:23:08	34.75	45.84	29.8	36.05	73	00:22:52
00:23:09	34.76	45.74	29.8	36.06	79	00:22:53
00:23:10	34.76	45.64	29.81	36.06	83	00:22:54
00:23:11	34.75	45.5	29.81	36.05	84	00:22:55
00:23:12	34.76	45.41	29.82	36.06	81	00:22:56
00:23:13	34.76	45.34	29.81	36.06	79	00:22:57
00:23:14	34.76	45.34	29.82	36.06	76	00:22:58
00:23:15	34.75	45.37	29.83	36.05	73	00:22:59
00:23:16	34.75	45.41	29.82	36.05	65	00:23:00
00:23:17	34.75	45.41	29.82	36.05	61	00:23:01
00:23:18	34.76	45.41	29.82	36.06	61	00:23:02
00:23:19	34.76	45.41	29.84	36.06	61	00:23:03
00:23:20	34.76	45.41	29.83	36.06	62	00:23:04
00:23:21	34.77	45.38	29.83	36.07	63	00:23:05
00:23:22	34.76	45.27	29.85	36.06	64	00:23:06
00:23:23	34.75	44.87	29.84	36.05	66	00:23:07
00:23:24	34.76	44.06	29.84	36.06	67	00:23:08
00:23:25	34.77	43.26	29.84	36.07	68	00:23:09
00:23:26	34.78	42.72	29.84	36.08	69	00:23:10
00:23:27	34.79	42.92	29.85	36.09	69	00:23:11
00:23:28	34.79	43.73	29.84	36.09	70	00:23:12
00:23:29	34.79	44.67	29.86	36.09	70	00:23:13
00:23:30	34.77	44.87	29.85	36.07	70	00:23:14
00:23:31	34.76	45.07	29.86	36.06	70	00:23:15
00:23:32	34.77	45.34	29.85	36.07	69	00:23:16
00:23:33	34.77	45.38	29.86	36.07	73	00:23:17
00:23:34	34.77	45.31	29.86	36.07	72	00:23:18
00:23:35	34.79	45.11	29.87	36.09	73	00:23:19
00:23:36	34.8	44.67	29.86	36.1	76	00:23:20
00:23:37	34.8	44	29.86	36.1	78	00:23:21
00:23:38	34.81	43.53	29.87	36.11	78	00:23:22
00:23:39	34.8	43.33	29.86	36.1	79	00:23:23
00:23:40	34.79	43.19	29.86	36.09	79	00:23:24
00:23:41	34.78	43.13	29.88	36.08	77	00:23:25
00:23:42	34.79	43.13	29.88	36.09	76	00:23:26
00:23:43	34.79	43.16	29.88	36.09	76	00:23:27
00:23:44	34.8	43.06	29.89	36.1	75	00:23:28
00:23:45	34.82	42.69	29.89	36.12	73	00:23:29
00:23:46	34.83	42.28	29.88	36.13	71	00:23:30
00:23:47	34.83	42.04	29.89	36.13	70	00:23:31
00:23:48	34.84	41.91	29.9	36.14	71	00:23:32
00:23:49	34.85	41.7	29.9	36.15	72	00:23:33
00:23:50	34.85	41.43	29.88	36.15	74	00:23:34
00:23:51	34.85	41.19	29.9	36.15	76	00:23:35
00:23:52	34.85	41.77	29.89	36.15	76	00:23:36
00:23:53	34.84	42.42	29.91	36.14	76	00:23:37
00:23:54	34.84	42.72	29.91	36.14	76	00:23:38
00:23:55	34.84	42.89	29.92	36.14	75	00:23:39
00:23:56	34.85	43.13	29.92	36.15	73	00:23:40
00:23:57	34.85	43.06	29.91	36.15	73	00:23:41
00:23:58	34.86	42.38	29.92	36.16	72	00:23:42
00:23:59	34.87	41.8	29.91	36.17	71	00:23:43
00:24:00	34.87	41.8	29.91	36.17	72	00:23:44
00:24:01	34.87	42.18	29.92	36.17	71	00:23:45
00:24:02	34.87	42.45	29.92	36.17	71	00:23:46
00:24:03	34.87	42.96	29.92	36.17	72	00:23:47
00:24:04	34.87	43.47	29.94	36.17	72	00:23:48
00:24:05	34.88	43.94	29.94	36.18	71	00:23:49
00:24:06	34.89	44.58	29.94	36.19	69	00:23:50
00:24:07	34.9	45.12	29.94	36.2	68	00:23:51
00:24:08	34.9	45.59	29.95	36.2	67	00:23:52
00:24:09	34.91	45.89	29.95	36.21	69	00:23:53
00:24:10	34.93	46.12	29.96	36.23	70	00:23:54
00:24:11	34.94	46.62	29.96	36.24	72	00:23:55
00:24:12	34.95	47.09	29.97	36.25	73	00:23:56
00:24:13	34.95	47.22	29.97	36.25	73	00:23:57
00:24:14	34.95	47.22	29.98	36.25	74	00:23:58
00:24:15	34.94	47.35	29.98	36.24	72	00:23:59
00:24:16	34.95	47.49	29.99	36.25	73	00:24:00
00:24:17	34.95	47.42	29.99	36.25	73	00:24:01
00:24:18	34.96	47.42	29.99	36.26	73	00:24:02
00:24:19	34.97	47.49	29.99	36.27	74	00:24:03
00:24:20	34.98	47.42	30	36.28	74	00:24:04
00:24:21	34.98	47.42	29.99	36.28	76	00:24:05
00:24:22	34.99	47.42	30	36.29	82	00:24:06
00:24:23	34.99	47.33	30	36.29	84	00:24:07
00:24:24	34.99	47.22	30.01	36.29	81	00:24:08
00:24:25	34.98	47.16	30.01	36.28	78	00:24:09
00:24:26	34.97	47.16	30.01	36.27	76	00:24:10
00:24:27	34.97	47.13	30.01	36.27	72	00:24:11
00:24:28	34.97	47.16	30.02	36.27	69	00:24:12
00:24:29	34.96	47.23	30.02	36.26	65	00:24:13
00:24:30	34.97	47.16	30.02	36.27	65	00:24:14
00:24:31	34.97	47.1	30.03	36.27	65	00:24:15
00:24:32	34.95	47.06	30.03	36.25	67	00:24:16
00:24:33	34.94	47.03	30.04	36.24	70	00:24:17
00:24:34	34.94	47.03	30.04	36.24	72	00:24:18
00:24:35	34.93	47.03	30.03	36.23	72	00:24:19
00:24:36	34.93	47	30.05	36.23	74	00:24:20
00:24:37	34.94	46.97	30.05	36.24	78	00:24:21
00:24:38	34.94	46.87	30.05	36.24	78	00:24:22
00:24:39	34.93	46.87	30.05	36.23	77	00:24:23
00:24:40	34.93	46.9	30.06	36.23	77	00:24:24
00:24:41	34.93	46.9	30.06	36.23	74	00:24:25
00:24:42	34.93	46.93	30.07	36.23	77	00:24:26
00:24:43	34.93	46.44	30.07	36.23	76	00:24:27
00:24:44	34.93	45.5	30.07	36.23	76	00:24:28
00:24:45	34.93	44.93	30.07	36.23	76	00:24:29
00:24:46	34.94	44.49	30.07	36.24	75	00:24:30
00:24:47	34.95	44.06	30.06	36.25	74	00:24:31
00:24:48	34.97	43.59	30.07	36.27	76	00:24:32
00:24:49	34.99	42.87	30.08	36.29	76	00:24:33
00:24:50	35.01	42.5	30.08	36.31	75	00:24:34
00:24:51	35.02	42.81	30.06	36.32	78	00:24:35
00:24:52	35.03	43.25	30.07	36.33	77	00:24:36
00:24:53	35.03	43.76	30.07	36.33	77	00:24:37
00:24:54	35.03	44.3	30.08	36.33	78	00:24:38
00:24:55	35.04	44.63	30.09	36.34	82	00:24:39
00:24:56	35.04	45.07	30.09	36.34	85	00:24:40
00:24:57	35.04	45.37	30.1	36.34	87	00:24:41
00:24:58	35.03	45.57	30.1	36.33	84	00:24:42
00:24:59	35.03	45.81	30.11	36.33	82	00:24:43
00:25:00	35.03	45.91	30.1	36.33	79	00:24:44
00:25:01	35.03	46.04	30.12	36.33	75	00:24:45
00:25:02	35.02	46.18	30.11	36.32	72	00:24:46
00:25:03	35.03	46.24	30.12	36.33	70	00:24:47
00:25:04	35.04	46.31	30.12	36.34	70	00:24:48
00:25:05	35.05	46.47	30.11	36.35	71	00:24:49
00:25:06	35.05	46.58	30.12	36.35	72	00:24:50
00:25:07	35.07	46.74	30.13	36.37	74	00:24:51
00:25:08	35.07	46.84	30.12	36.37	77	00:24:52
00:25:09	35.07	46.78	30.13	36.37	78	00:24:53
00:25:10	35.07	46.81	30.14	36.37	80	00:24:54
00:25:11	35.06	46.81	30.13	36.36	80	00:24:55
00:25:12	35.05	46.74	30.13	36.35	80	00:24:56
00:25:13	35.04	46.78	30.14	36.34	79	00:24:57
00:25:14	35.03	46.85	30.14	36.33	78	00:24:58
00:25:15	35.02	47.01	30.15	36.32	77	00:24:59
00:25:16	35.03	47.18	30.15	36.33	77	00:25:00
00:25:17	35.03	47.31	30.15	36.33	78	00:25:01
00:25:18	35.04	47.18	30.16	36.34	79	00:25:02
00:25:19	35.05	47.15	30.16	36.35	79	00:25:03
00:25:20	35.06	47.01	30.16	36.36	79	00:25:04
00:25:21	35.06	46.85	30.17	36.36	78	00:25:05
00:25:22	35.06	46.85	30.17	36.36	77	00:25:06
00:25:23	35.06	46.81	30.18	36.36	76	00:25:07
00:25:24	35.05	46.75	30.17	36.35	77	00:25:08
00:25:25	35.05	46.55	30.18	36.35	77	00:25:09
00:25:26	35.05	46.52	30.18	36.35	78	00:25:10
00:25:27	35.06	46.25	30.17	36.36	80	00:25:11
00:25:28	35.06	45.78	30.19	36.36	80	00:25:12
00:25:29	35.07	45.75	30.18	36.37	81	00:25:13
00:25:30	35.07	45.85	30.2	36.37	80	00:25:14
00:25:31	35.07	45.85	30.2	36.37	79	00:25:15
00:25:32	35.09	45.88	30.2	36.39	75	00:25:16
00:25:33	35.1	45.85	30.2	36.4	72	00:25:17
00:25:34	35.11	45.95	30.2	36.41	68	00:25:18
00:25:35	35.11	45.99	30.21	36.41	67	00:25:19
00:25:37	35.11	45.52	30.18	36.41	68	00:25:20
00:25:38	35.11	45.65	30.2	36.41	70	00:25:21
00:25:39	35.11	45.69	30.2	36.41	72	00:25:22
00:25:40	35.11	45.82	30.22	36.41	74	00:25:23
00:25:41	35.11	45.62	30.21	36.41	77	00:25:24
00:25:42	35.11	45.28	30.21	36.41	79	00:25:25
00:25:43	35.1	45.18	30.22	36.4	81	00:25:26
00:25:44	35.09	45.22	30.23	36.39	82	00:25:27
00:25:46	35.08	45.25	30.18	36.38	81	00:25:28
00:25:47	35.07	45.32	30.21	36.37	80	00:25:29
00:25:48	35.07	45.59	30.23	36.37	79	00:25:30
00:25:49	35.07	45.86	30.22	36.37	78	00:25:31
00:25:50	35.06	45.96	30.24	36.36	77	00:25:32
00:25:51	35.04	46.19	30.24	36.34	76	00:25:33
00:25:52	35.03	46.06	30.24	36.33	76	00:25:34
00:25:53	35.01	45.59	30.24	36.31	77	00:25:35
00:25:54	35.01	45.52	30.25	36.31	79	00:25:36
00:25:55	35.01	45.82	30.26	36.31	79	00:25:37
00:25:56	35.01	46.06	30.25	36.31	77	00:25:38
00:25:57	35.01	46.09	30.25	36.31	74	00:25:39
00:25:58	35.02	46.22	30.26	36.32	72	00:25:40
00:25:59	35.02	46.36	30.26	36.32	70	00:25:41
00:26:00	35.02	46.39	30.26	36.32	70	00:25:42
00:26:01	35.02	46.53	30.26	36.32	71	00:25:43
00:26:02	35.03	46.49	30.28	36.33	73	00:25:44
00:26:03	35.03	46.26	30.26	36.33	76	00:25:45
00:26:04	35.04	46.4	30.29	36.34	78	00:25:46
00:26:05	35.05	46.79	30.27	36.35	80	00:25:47
00:26:06	35.05	46.89	30.28	36.35	81	00:25:48
00:26:07	35.04	46.96	30.28	36.34	80	00:25:49
00:26:08	35.04	46.46	30.28	36.34	79	00:25:50
00:26:09	35.03	45.6	30.3	36.33	76	00:25:51
00:26:10	35.03	45.12	30.29	36.33	73	00:25:52
00:26:11	35.03	45.46	30.28	36.33	70	00:25:53
00:26:12	35.03	45.9	30.3	36.33	68	00:25:54
00:26:13	35.04	46.3	30.31	36.34	68	00:25:55
00:26:14	35.04	46.56	30.3	36.34	68	00:25:56
00:26:15	35.03	46.73	30.31	36.33	70	00:25:57
00:26:16	35.03	46.9	30.3	36.33	72	00:25:58
00:26:17	35.03	46.9	30.3	36.33	73	00:25:59
00:26:18	35.02	46.67	30.32	36.32	73	00:26:00
00:26:19	35.02	46.4	30.32	36.32	74	00:26:01
00:26:20	35.02	46.4	30.32	36.32	76	00:26:02
00:26:21	35.03	46.6	30.32	36.33	76	00:26:03
00:26:22	35.03	46.8	30.33	36.33	73	00:26:04
00:26:23	35.03	46.8	30.32	36.33	70	00:26:05
00:26:24	35.03	46.83	30.33	36.33	68	00:26:06
00:26:25	35.03	46.57	30.33	36.33	66	00:26:07
00:26:26	35.02	46.87	30.33	36.32	67	00:26:08
00:26:27	35.02	47.4	30.34	36.32	68	00:26:09
00:26:28	35.02	47.73	30.34	36.32	69	00:26:10
00:26:29	35.02	48.03	30.35	36.32	71	00:26:11
00:26:30	35.02	48.26	30.34	36.32	73	00:26:12
00:26:31	35.02	48.36	30.35	36.32	77	00:26:13
00:26:32	35.02	48.36	30.36	36.32	80	00:26:14
00:26:33	35.02	48.43	30.36	36.32	83	00:26:15
00:26:34	35.02	48.56	30.36	36.32	84	00:26:16
00:26:35	35.03	48.46	30.36	36.33	82	00:26:17
00:26:36	35.04	47.83	30.37	36.34	77	00:26:18
00:26:37	35.05	47.07	30.36	36.35	73	00:26:19
00:26:38	35.06	46.8	30.36	36.36	71	00:26:20
00:26:39	35.07	47.07	30.36	36.37	72	00:26:21
00:26:40	35.07	47.3	30.37	36.37	74	00:26:22
00:26:41	35.07	47.44	30.37	36.37	75	00:26:23
00:26:42	35.07	47.47	30.37	36.37	76	00:26:24
00:26:43	35.07	47.54	30.39	36.37	76	00:26:25
00:26:44	35.07	47.67	30.4	36.37	77	00:26:26
00:26:45	35.07	47.8	30.39	36.37	77	00:26:27
00:26:46	35.08	47.87	30.38	36.38	77	00:26:28
00:26:47	35.08	47.94	30.4	36.38	77	00:26:29
00:26:48	35.08	47.94	30.4	36.38	76	00:26:30
00:26:49	35.08	47.87	30.4	36.38	76	00:26:31
00:26:50	35.08	47.84	30.4	36.38	77	00:26:32
00:26:51	35.08	47.74	30.41	36.38	78	00:26:33
00:26:52	35.08	47.61	30.41	36.38	78	00:26:34
00:26:53	35.09	47.41	30.41	36.39	79	00:26:35
00:26:54	35.1	47.28	30.41	36.4	80	00:26:36
00:26:55	35.11	47.21	30.42	36.41	79	00:26:37
00:26:56	35.11	47.11	30.42	36.41	77	00:26:38
00:26:57	35.11	47.08	30.42	36.41	74	00:26:39
00:26:58	35.11	47.08	30.42	36.41	70	00:26:40
00:26:59	35.1	46.98	30.43	36.4	67	00:26:41
00:27:00	35.09	47.05	30.43	36.39	65	00:26:42
00:27:01	35.09	47.05	30.43	36.39	65	00:26:43
00:27:02	35.11	46.98	30.44	36.41	67	00:26:44
00:27:03	35.12	47.15	30.44	36.42	69	00:26:45
00:27:04	35.13	47.28	30.45	36.43	71	00:26:46
00:27:05	35.13	47.21	30.45	36.43	74	00:26:47
00:27:06	35.13	47.28	30.45	36.43	76	00:26:48
00:27:07	35.11	47.35	30.46	36.41	77	00:26:49
00:27:08	35.1	47.21	30.45	36.4	77	00:26:50
00:27:09	35.1	47.22	30.46	36.4	77	00:26:51
00:27:10	35.1	47.28	30.47	36.4	75	00:26:52
00:27:11	35.11	47.28	30.46	36.41	73	00:26:53
00:27:12	35.12	47.38	30.46	36.42	72	00:26:54
00:27:13	35.13	47.31	30.47	36.43	71	00:26:55
00:27:14	35.13	47.25	30.47	36.43	71	00:26:56
00:27:15	35.13	47.35	30.47	36.43	71	00:26:57
00:27:16	35.12	47.28	30.47	36.42	71	00:26:58
00:27:17	35.12	47.35	30.49	36.42	72	00:26:59
00:27:18	35.11	47.35	30.49	36.41	72	00:27:00
00:27:19	35.11	47.22	30.49	36.41	73	00:27:01
00:27:20	35.11	47.25	30.49	36.41	73	00:27:02
00:27:21	35.11	47.22	30.5	36.41	72	00:27:03
00:27:22	35.11	47.22	30.5	36.41	72	00:27:04
00:27:23	35.11	47.29	30.51	36.41	72	00:27:05
00:27:24	35.11	47.22	30.5	36.41	72	00:27:06
00:27:25	35.12	47.29	30.51	36.42	72	00:27:07
00:27:26	35.12	47.29	30.51	36.42	72	00:27:08
00:27:27	35.12	47.15	30.52	36.42	72	00:27:09
00:27:28	35.12	47.15	30.51	36.42	72	00:27:10
00:27:29	35.13	46.92	30.52	36.43	70	00:27:11
00:27:30	35.12	46.59	30.52	36.42	70	00:27:12
00:27:31	35.13	46.62	30.52	36.43	70	00:27:13
00:27:32	35.14	47.06	30.52	36.44	70	00:27:14
00:27:33	35.15	47.42	30.52	36.45	70	00:27:15
00:27:34	35.14	47.49	30.52	36.44	71	00:27:16
00:27:35	35.14	47.42	30.53	36.44	71	00:27:17
00:27:36	35.14	47.55	30.53	36.44	71	00:27:18
00:27:37	35.13	47.62	30.52	36.43	71	00:27:19
00:27:38	35.12	47.69	30.52	36.42	71	00:27:20
00:27:39	35.12	47.69	30.53	36.42	71	00:27:21
00:27:40	35.12	47.66	30.54	36.42	71	00:27:22
00:27:41	35.11	47.62	30.54	36.41	72	00:27:23
00:27:42	35.12	47.69	30.55	36.42	73	00:27:24
00:27:43	35.13	47.62	30.57	36.43	75	00:27:25
00:27:44	35.14	47.56	30.56	36.44	76	00:27:26
00:27:45	35.15	47.53	30.56	36.45	76	00:27:27
00:27:46	35.17	47.49	30.57	36.47	77	00:27:28
00:27:47	35.17	47.36	30.56	36.47	79	00:27:29
00:27:48	35.19	47.36	30.56	36.49	80	00:27:30
00:27:49	35.2	47.39	30.58	36.5	77	00:27:31
00:27:50	35.21	47.29	30.58	36.51	75	00:27:32
00:27:51	35.22	47.29	30.57	36.52	73	00:27:33
00:27:52	35.23	47.26	30.58	36.53	73	00:27:34
00:27:53	35.23	47.23	30.59	36.53	73	00:27:35
00:27:54	35.23	47.3	30.58	36.53	74	00:27:36
00:27:55	35.23	47.3	30.59	36.53	74	00:27:37
00:27:56	35.23	47.2	30.59	36.53	76	00:27:38
00:27:57	35.24	47.23	30.59	36.54	78	00:27:39
00:27:58	35.24	47.33	30.59	36.54	80	00:27:40
00:27:59	35.24	47.5	30.61	36.54	80	00:27:41
00:28:00	35.24	47.63	30.6	36.54	78	00:27:42
00:28:01	35.24	47.73	30.6	36.54	74	00:27:43
00:28:02	35.24	47.83	30.61	36.54	75	00:27:44
00:28:03	35.23	48.06	30.61	36.53	73	00:27:45
00:28:04	35.22	48.23	30.61	36.52	72	00:27:46
00:28:05	35.22	48.23	30.61	36.52	71	00:27:47
00:28:06	35.22	48.26	30.62	36.52	71	00:27:48
00:28:07	35.22	48.39	30.63	36.52	71	00:27:49
00:28:08	35.22	48.39	30.64	36.52	74	00:27:50
00:28:09	35.22	48.3	30.64	36.52	76	00:27:51
00:28:10	35.23	48.33	30.64	36.53	75	00:27:52
00:28:11	35.24	48.36	30.64	36.54	75	00:27:53
00:28:12	35.24	48.3	30.63	36.54	74	00:27:54
00:28:13	35.24	48.16	30.64	36.54	72	00:27:55
00:28:14	35.25	48.2	30.64	36.55	72	00:27:56
00:28:15	35.25	48.17	30.64	36.55	76	00:27:57
00:28:16	35.25	48.03	30.65	36.55	74	00:27:58
00:28:17	35.25	47.93	30.65	36.55	73	00:27:59
00:28:18	35.25	47.9	30.65	36.55	72	00:28:00
00:28:19	35.25	47.77	30.65	36.55	71	00:28:01
00:28:20	35.24	47.64	30.65	36.54	70	00:28:02
00:28:21	35.24	47.64	30.66	36.54	67	00:28:03
00:28:22	35.24	47.5	30.66	36.54	68	00:28:04
00:28:23	35.24	47.37	30.66	36.54	70	00:28:05
00:28:24	35.25	47.31	30.68	36.55	70	00:28:06
00:28:25	35.25	47.11	30.66	36.55	71	00:28:07
00:28:26	35.25	47.01	30.66	36.55	74	00:28:08
00:28:27	35.25	46.81	30.67	36.55	72	00:28:09
00:28:28	35.25	46.81	30.67	36.55	74	00:28:10
00:28:29	35.24	46.91	30.68	36.54	74	00:28:11
00:28:30	35.24	46.84	30.68	36.54	70	00:28:12
00:28:31	35.25	46.54	30.68	36.55	75	00:28:13
00:28:32	35.26	45.64	30.67	36.56	72	00:28:14
00:28:33	35.27	45.37	30.68	36.57	71	00:28:15
00:28:34	35.27	45.31	30.69	36.57	72	00:28:16
00:28:35	35.29	44.9	30.68	36.59	69	00:28:17
00:28:36	35.29	45.17	30.69	36.59	70	00:28:18
00:28:37	35.3	45.78	30.7	36.6	71	00:28:19
00:28:38	35.3	46.34	30.7	36.6	74	00:28:20
00:28:39	35.3	46.78	30.7	36.6	73	00:28:21
00:28:40	35.28	46.38	30.7	36.58	76	00:28:22
00:28:41	35.27	46.45	30.7	36.57	73	00:28:23
00:28:42	35.25	46.71	30.7	36.55	73	00:28:24
00:28:43	35.24	46.95	30.71	36.54	73	00:28:25
00:28:44	35.24	47.08	30.71	36.54	73	00:28:26
00:28:45	35.23	47.05	30.72	36.53	76	00:28:27
00:28:46	35.23	46.85	30.72	36.53	79	00:28:28
00:28:47	35.22	46.65	30.71	36.52	79	00:28:29
00:28:48	35.22	46.48	30.72	36.52	79	00:28:30
00:28:49	35.21	46.25	30.71	36.51	79	00:28:31
00:28:50	35.21	45.98	30.71	36.51	77	00:28:32
00:28:51	35.2	45.64	30.72	36.5	74	00:28:33
00:28:52	35.2	45.51	30.73	36.5	73	00:28:34
00:28:53	35.2	45.51	30.74	36.5	73	00:28:35
00:28:54	35.2	45.44	30.73	36.5	74	00:28:36
00:28:55	35.2	45.18	30.74	36.5	75	00:28:37
00:28:56	35.21	44.84	30.74	36.51	76	00:28:38
00:28:57	35.21	44.64	30.74	36.51	78	00:28:39
00:28:58	35.21	44.2	30.74	36.51	78	00:28:40
00:28:59	35.2	43.42	30.73	36.5	76	00:28:41
00:29:00	35.19	43.15	30.73	36.49	75	00:28:42
00:29:01	35.18	43.29	30.74	36.48	73	00:28:43
00:29:02	35.17	43.36	30.74	36.47	72	00:28:44
00:29:03	35.16	43.83	30.74	36.46	72	00:28:45
00:29:04	35.16	44.71	30.74	36.46	71	00:28:46
00:29:05	35.16	45.71	30.75	36.46	71	00:28:47
00:29:06	35.15	46.32	30.75	36.45	71	00:28:48
00:29:07	35.16	46.78	30.75	36.46	72	00:28:49
00:29:08	35.16	47.05	30.76	36.46	73	00:28:50
00:29:09	35.16	47.18	30.76	36.46	74	00:28:51
00:29:10	35.16	47.22	30.76	36.46	74	00:28:52
00:29:11	35.16	47.02	30.76	36.46	75	00:28:53
00:29:12	35.16	46.85	30.77	36.46	76	00:28:54
00:29:13	35.17	46.95	30.76	36.47	77	00:28:55
00:29:14	35.17	47.12	30.76	36.47	77	00:28:56
00:29:15	35.17	46.85	30.77	36.47	76	00:28:57
00:29:16	35.18	45.95	30.76	36.48	73	00:28:58
00:29:17	35.17	45.65	30.77	36.47	73	00:28:59
00:29:18	35.16	45.31	30.76	36.46	73	00:29:00
00:29:19	35.17	45.25	30.76	36.47	74	00:29:01
00:29:20	35.17	45.32	30.77	36.47	74	00:29:02
00:29:21	35.16	45.48	30.77	36.46	73	00:29:03
00:29:22	35.17	45.85	30.78	36.47	72	00:29:04
00:29:23	35.18	46.22	30.79	36.48	70	00:29:05
00:29:24	35.18	46.45	30.78	36.48	69	00:29:06
00:29:25	35.19	46.65	30.79	36.49	69	00:29:07
00:29:26	35.21	46.82	30.8	36.51	70	00:29:08
00:29:27	35.21	46.92	30.81	36.51	70	00:29:09
00:29:28	35.21	46.99	30.8	36.51	71	00:29:10
00:29:29	35.21	47.13	30.8	36.51	73	00:29:11
00:29:30	35.21	47.19	30.82	36.51	77	00:29:12
00:29:32	35.2	47.29	30.78	36.5	79	00:29:13
00:29:33	35.2	47.32	30.8	36.5	81	00:29:14
00:29:34	35.2	47.26	30.8	36.5	84	00:29:15
00:29:35	35.2	47.29	30.81	36.5	82	00:29:16
00:29:36	35.2	47.32	30.81	36.5	78	00:29:17
00:29:37	35.2	47.29	30.81	36.5	76	00:29:18
00:29:38	35.2	47.32	30.82	36.5	73	00:29:19
00:29:39	35.2	47.32	30.82	36.5	73	00:29:20
00:29:40	35.2	47.13	30.83	36.5	74	00:29:21
00:29:41	35.2	46.36	30.82	36.5	74	00:29:22
00:29:42	35.2	45.25	30.81	36.5	74	00:29:23
00:29:43	35.21	45.15	30.82	36.51	74	00:29:24
00:29:44	35.2	45.59	30.82	36.5	74	00:29:25
00:29:45	35.21	45.86	30.83	36.51	73	00:29:26
00:29:46	35.22	45.89	30.83	36.52	73	00:29:27
00:29:47	35.21	45.86	30.83	36.51	71	00:29:28
00:29:48	35.2	45.96	30.84	36.5	70	00:29:29
00:29:49	35.21	46.09	30.84	36.51	70	00:29:30
00:29:50	35.2	46.13	30.84	36.5	69	00:29:31
00:29:51	35.19	46.09	30.85	36.49	70	00:29:32
00:29:52	35.2	46.03	30.85	36.5	70	00:29:33
00:29:53	35.2	45.89	30.84	36.5	71	00:29:34
00:29:54	35.2	45.79	30.85	36.5	73	00:29:35
00:29:55	35.2	45.76	30.85	36.5	75	00:29:36
00:29:56	35.21	45.63	30.85	36.51	76	00:29:37
00:29:57	35.21	45.46	30.85	36.51	77	00:29:38
00:29:58	35.21	45.36	30.85	36.51	79	00:29:39
00:29:59	35.22	45.26	30.85	36.52	77	00:29:40
00:30:00	35.23	45.12	30.88	36.53	81	00:29:41
00:30:01	35.22	45.12	30.86	36.52	78	00:29:42
00:30:02	35.23	45.09	30.86	36.53	75	00:29:43
00:30:03	35.23	45.06	30.87	36.53	73	00:29:44
00:30:04	35.22	44.99	30.88	36.52	72	00:29:45
00:30:05	35.22	44.99	30.88	36.52	70	00:29:46
00:30:06	35.22	44.92	30.88	36.52	69	00:29:47
00:30:07	35.21	44.86	30.88	36.51	69	00:29:48
00:30:08	35.21	44.79	30.88	36.51	68	00:29:49
00:30:09	35.21	44.72	30.89	36.51	69	00:29:50
00:30:10	35.2	44.72	30.88	36.5	71	00:29:51
00:30:11	35.2	44.66	30.88	36.5	71	00:29:52
00:30:12	35.2	44.56	30.89	36.5	72	00:29:53
00:30:13	35.2	44.52	30.88	36.5	72	00:29:54
00:30:14	35.2	44.52	30.9	36.5	72	00:29:55
00:30:15	35.21	44.52	30.88	36.51	73	00:29:56
00:30:16	35.22	44.45	30.89	36.52	73	00:29:57
00:30:17	35.22	44.35	30.88	36.52	73	00:29:58
00:30:18	35.22	44.15	30.88	36.52	73	00:29:59
00:30:19	35.22	44.08	30.9	36.52	73	00:30:00
00:30:20	35.21	44.05	30.9	36.51	73	00:30:01
00:30:21	35.21	44.12	30.89	36.51	74	00:30:02
00:30:22	35.21	44.18	30.89	36.51	73	00:30:03
00:30:23	35.21	44.19	30.89	36.51	71	00:30:04
00:30:24	35.22	44.08	30.89	36.52	71	00:30:05
00:30:25	35.23	44.02	30.9	36.53	73	00:30:06
00:30:26	35.23	43.85	30.9	36.53	74	00:30:07
00:30:27	35.24	43.68	30.9	36.54	74	00:30:08
00:30:28	35.24	43.54	30.9	36.54	75	00:30:09
00:30:29	35.24	43.44	30.89	36.54	74	00:30:10
00:30:30	35.25	43.31	30.91	36.55	73	00:30:11
00:30:31	35.26	43.1	30.9	36.56	73	00:30:12
00:30:32	35.25	42.87	30.92	36.55	76	00:30:13
00:30:33	35.26	42.7	30.91	36.56	77	00:30:14
00:30:34	35.27	42.56	30.9	36.57	80	00:30:15
00:30:35	35.26	42.56	30.92	36.56	82	00:30:16
00:30:36	35.25	42.49	30.92	36.55	82	00:30:17
00:30:37	35.25	42.36	30.92	36.55	77	00:30:18
00:30:38	35.25	42.22	30.92	36.55	73	00:30:19
00:30:39	35.24	42.15	30.91	36.54	70	00:30:20
00:30:40	35.24	42.15	30.92	36.54	67	00:30:21
00:30:41	35.25	42.36	30.93	36.55	66	00:30:22
00:30:42	35.25	42.56	30.93	36.55	67	00:30:23
00:30:43	35.25	42.6	30.94	36.55	67	00:30:24
00:30:44	35.26	42.49	30.93	36.56	68	00:30:25
00:30:45	35.28	42.29	30.94	36.58	69	00:30:26
00:30:46	35.28	42.15	30.94	36.58	70	00:30:27
00:30:47	35.29	41.95	30.94	36.59	70	00:30:28
00:30:48	35.3	41.81	30.94	36.6	70	00:30:29
00:30:49	35.32	41.75	30.94	36.62	70	00:30:30
00:30:50	35.32	41.68	30.94	36.62	70	00:30:31
00:30:51	35.33	41.68	30.95	36.63	70	00:30:32
00:30:52	35.34	41.78	30.95	36.64	70	00:30:33
00:30:53	35.34	42.05	30.94	36.64	70	00:30:34
00:30:54	35.33	42.29	30.96	36.63	71	00:30:35
00:30:55	35.33	42.33	30.95	36.63	71	00:30:36
00:30:56	35.32	42.33	30.96	36.62	70	00:30:37
00:30:57	35.32	42.5	30.96	36.62	69	00:30:38
00:30:58	35.32	42.5	30.96	36.62	68	00:30:39
00:30:59	35.32	42.29	30.96	36.62	68	00:30:40
00:31:00	35.31	42.09	30.96	36.61	68	00:30:41
00:31:01	35.32	42.16	30.96	36.62	67	00:30:42
00:31:02	35.33	42.36	30.98	36.63	68	00:30:43
00:31:03	35.32	42.57	30.98	36.62	68	00:30:44
00:31:04	35.32	42.7	30.98	36.62	68	00:30:45
00:31:05	35.33	42.64	30.97	36.63	68	00:30:46
00:31:06	35.33	42.4	30.99	36.63	67	00:30:47
00:31:07	35.32	42.26	30.99	36.62	67	00:30:48
00:31:08	35.32	42.16	30.99	36.62	67	00:30:49
00:31:09	35.33	42.02	30.99	36.63	67	00:30:50
00:31:10	35.33	42.02	31	36.63	68	00:30:51
00:31:11	35.33	41.92	31	36.63	68	00:30:52
00:31:12	35.33	41.96	31	36.63	68	00:30:53
00:31:13	35.34	42.09	31.01	36.64	69	00:30:54
00:31:14	35.34	42.23	31.01	36.64	70	00:30:55
00:31:15	35.34	42.16	31	36.64	69	00:30:56
00:31:16	35.35	41.79	31	36.65	69	00:30:57
00:31:17	35.35	41.38	31	36.65	70	00:30:58
00:31:18	35.35	41.34	31	36.65	71	00:30:59
00:31:19	35.35	41.48	31.01	36.65	71	00:31:00
00:31:20	35.36	41.69	31.01	36.66	70	00:31:01
00:31:21	35.35	41.89	31.02	36.65	70	00:31:02
00:31:22	35.35	42.09	31.01	36.65	70	00:31:03
00:31:23	35.35	42.37	31.02	36.65	70	00:31:04
00:31:24	35.34	42.57	31.01	36.64	70	00:31:05
00:31:25	35.33	42.74	31	36.63	70	00:31:06
00:31:26	35.34	42.81	31.01	36.64	70	00:31:07
00:31:27	35.34	42.67	31.02	36.64	71	00:31:08
00:31:28	35.34	42.3	31.02	36.64	70	00:31:09
00:31:29	35.34	41.55	31.01	36.64	69	00:31:10
00:31:30	35.36	40.72	31.01	36.66	71	00:31:11
00:31:31	35.36	40.17	31	36.66	73	00:31:12
00:31:32	35.38	40.31	31	36.68	74	00:31:13
00:31:33	35.39	40.93	31.01	36.69	78	00:31:14
00:31:34	35.4	41.55	31.01	36.7	74	00:31:15
00:31:35	35.4	42.57	31.01	36.7	71	00:31:16
00:31:36	35.4	43.22	31.01	36.7	68	00:31:17
00:31:37	35.4	44.33	31.03	36.7	68	00:31:18
00:31:38	35.41	44.77	31.02	36.71	69	00:31:19
00:31:39	35.42	44.57	31.03	36.72	71	00:31:20
00:31:40	35.42	44.37	31.03	36.72	75	00:31:21
00:31:41	35.42	44.34	31.03	36.72	79	00:31:22
00:31:42	35.42	44.4	31.04	36.72	82	00:31:23
00:31:43	35.42	44.54	31.04	36.72	83	00:31:24
00:31:44	35.41	44.71	31.05	36.71	83	00:31:25
00:31:45	35.41	44.81	31.05	36.71	81	00:31:26
00:31:46	35.42	44.88	31.03	36.72	81	00:31:27
00:31:47	35.42	44.94	31.05	36.72	78	00:31:28
00:31:48	35.41	45.08	31.04	36.71	75	00:31:29
00:31:49	35.42	45.21	31.06	36.72	72	00:31:30
00:31:50	35.41	45.25	31.05	36.71	71	00:31:31
00:31:51	35.41	45.21	31.06	36.71	72	00:31:32
00:31:52	35.41	45.18	31.06	36.71	73	00:31:33
00:31:53	35.42	45.15	31.07	36.72	74	00:31:34
00:31:54	35.42	44.98	31.06	36.72	75	00:31:35
00:31:55	35.43	44.81	31.06	36.73	75	00:31:36
00:31:56	35.42	44.68	31.07	36.72	73	00:31:37
00:31:57	35.4	44.58	31.07	36.7	70	00:31:38
00:31:58	35.39	44.48	31.07	36.69	69	00:31:39
00:31:59	35.38	44.41	31.07	36.68	68	00:31:40
00:32:00	35.37	44.41	31.08	36.67	68	00:31:41
00:32:01	35.38	44.34	31.09	36.68	68	00:31:42
00:32:02	35.4	44.31	31.08	36.7	68	00:31:43
00:32:03	35.41	44.21	31.08	36.71	67	00:31:44
00:32:04	35.42	44.17	31.08	36.72	67	00:31:45
00:32:05	35.43	44.31	31.08	36.73	72	00:31:46
00:32:06	35.42	44.34	31.09	36.72	71	00:31:47
00:32:07	35.41	44.38	31.09	36.71	70	00:31:48
00:32:08	35.41	44.44	31.09	36.71	70	00:31:49
00:32:09	35.4	44.48	31.1	36.7	72	00:31:50
00:32:10	35.39	44.34	31.1	36.69	71	00:31:51
00:32:11	35.4	43.84	31.09	36.7	74	00:31:52
00:32:12	35.4	42.99	31.09	36.7	74	00:31:53
00:32:13	35.4	42.1	31.08	36.7	74	00:31:54
00:32:14	35.41	41.96	31.09	36.71	72	00:31:55
00:32:15	35.42	42.92	31.1	36.72	69	00:31:56
00:32:16	35.41	44.08	31.11	36.71	68	00:31:57
00:32:17	35.42	44.61	31.13	36.72	66	00:31:58
00:32:18	35.42	45.12	31.12	36.72	66	00:31:59
00:32:19	35.42	45.52	31.12	36.72	67	00:32:00
00:32:20	35.42	45.79	31.12	36.72	68	00:32:01
00:32:21	35.42	45.92	31.11	36.72	68	00:32:02
00:32:22	35.41	45.96	31.12	36.71	70	00:32:03
00:32:23	35.42	46.03	31.12	36.72	71	00:32:04
00:32:24	35.42	46.03	31.13	36.72	67	00:32:05
00:32:25	35.42	46.03	31.13	36.72	68	00:32:06
00:32:26	35.43	45.96	31.12	36.73	72	00:32:07
00:32:27	35.43	46.03	31.14	36.73	75	00:32:08
00:32:28	35.41	46.09	31.14	36.71	80	00:32:09
00:32:29	35.4	46.16	31.14	36.7	84	00:32:10
00:32:30	35.39	46.16	31.15	36.69	83	00:32:11
00:32:31	35.39	46.2	31.15	36.69	78	00:32:12
00:32:32	35.41	46.26	31.14	36.71	74	00:32:13
00:32:33	35.42	46.23	31.14	36.72	70	00:32:14
00:32:34	35.43	46.13	31.15	36.73	66	00:32:15
00:32:35	35.44	46.1	31.16	36.74	63	00:32:16
00:32:36	35.44	46.1	31.14	36.74	60	00:32:17
00:32:37	35.44	46.1	31.15	36.74	60	00:32:18
00:32:38	35.44	46.03	31.16	36.74	61	00:32:19
00:32:39	35.44	45.96	31.16	36.74	64	00:32:20
00:32:40	35.44	46.1	31.16	36.74	65	00:32:21
00:32:41	35.44	46.16	31.15	36.74	67	00:32:22
00:32:42	35.42	46.23	31.16	36.72	68	00:32:23
00:32:43	35.42	45.96	31.16	36.72	69	00:32:24
00:32:44	35.43	45.53	31.17	36.73	70	00:32:25
00:32:45	35.43	45.39	31.17	36.73	71	00:32:26
00:32:46	35.43	45.56	31.16	36.73	70	00:32:27
00:32:47	35.44	45.86	31.18	36.74	74	00:32:28
00:32:48	35.44	46.1	31.18	36.74	72	00:32:29
00:32:49	35.43	46.27	31.16	36.73	68	00:32:30
00:32:50	35.43	46.3	31.18	36.73	70	00:32:31
00:32:51	35.43	46.3	31.18	36.73	69	00:32:32
00:32:52	35.43	46.44	31.19	36.73	69	00:32:33
00:32:53	35.42	46.37	31.2	36.72	69	00:32:34
00:32:54	35.42	46.3	31.19	36.72	68	00:32:35
00:32:55	35.42	46.5	31.19	36.72	66	00:32:36
00:32:56	35.43	46.67	31.19	36.73	64	00:32:37
00:32:57	35.44	46.74	31.2	36.74	69	00:32:38
00:32:58	35.46	46.57	31.2	36.76	72	00:32:39
00:32:59	35.46	45.43	31.19	36.76	74	00:32:40
00:33:00	35.47	44.02	31.18	36.77	73	00:32:41
00:33:01	35.47	43.27	31.19	36.77	73	00:32:42
00:33:02	35.46	43.13	31.2	36.76	75	00:32:43
00:33:03	35.46	43.27	31.2	36.76	74	00:32:44
00:33:04	35.47	43.88	31.2	36.77	73	00:32:45
00:33:05	35.47	44.46	31.2	36.77	71	00:32:46
00:33:06	35.47	44.69	31.2	36.77	68	00:32:47
00:33:07	35.48	44.83	31.21	36.78	63	00:32:48
00:33:08	35.47	45	31.21	36.77	62	00:32:49
00:33:09	35.47	45.1	31.21	36.77	62	00:32:50
00:33:10	35.46	45.23	31.21	36.76	65	00:32:51
00:33:11	35.46	45.3	31.22	36.76	70	00:32:52
00:33:12	35.46	45.33	31.23	36.76	75	00:32:53
00:33:13	35.46	45.4	31.21	36.76	78	00:32:54
00:33:14	35.45	45.37	31.22	36.75	79	00:32:55
00:33:15	35.46	45.37	31.23	36.76	76	00:32:56
00:33:16	35.46	45.43	31.22	36.76	73	00:32:57
00:33:17	35.46	45.5	31.23	36.76	70	00:32:58
00:33:18	35.45	45.5	31.23	36.75	66	00:32:59
00:33:19	35.46	45.44	31.22	36.76	63	00:33:00
00:33:20	35.46	45.43	31.23	36.76	63	00:33:01
00:33:21	35.45	45.47	31.23	36.75	63	00:33:02
00:33:22	35.45	45.47	31.23	36.75	64	00:33:03
00:33:23	35.46	45.37	31.24	36.76	64	00:33:04
00:33:24	35.45	45.07	31.24	36.75	65	00:33:05
00:33:25	35.43	45.17	31.24	36.73	67	00:33:06
00:33:26	35.43	45.3	31.24	36.73	68	00:33:07
00:33:27	35.42	45.34	31.24	36.72	69	00:33:08
00:33:28	35.42	45.03	31.25	36.72	70	00:33:09
00:33:29	35.43	44.93	31.25	36.73	71	00:33:10
00:33:30	35.45	44.97	31.24	36.75	72	00:33:11
00:33:31	35.46	44.26	31.24	36.76	73	00:33:12
00:33:32	35.48	43.58	31.25	36.78	73	00:33:13
00:33:33	35.5	43.55	31.25	36.8	73	00:33:14
00:33:34	35.5	43.82	31.24	36.8	73	00:33:15
00:33:35	35.5	44.22	31.25	36.8	73	00:33:16
00:33:36	35.51	44.53	31.26	36.81	72	00:33:17
00:33:37	35.51	44.63	31.25	36.81	72	00:33:18
[truncated: 4,603 more rows]

## Sheet: 5
Time (h:m:s)	Tc (C)	RH (%)	Ta (C)	Tc (C)	HR (bpm)	Time HR	Correction factor	1.7
00:00:07	34.14	63.07	19.67	35.84	57	00:00:00
00:00:08	34.15	63.44	19.7	35.85	57	00:00:01
00:00:09	34.15	63.24	19.7	35.85	59	00:00:02
00:00:10	34.14	62.6	19.7	35.84	61	00:00:03
00:00:11	34.14	61.96	19.7	35.84	60	00:00:04
00:00:12	34.15	61.43	19.72	35.85	58	00:00:05
00:00:13	34.16	60.8	19.74	35.86	58	00:00:06
00:00:14	34.16	60.21	19.74	35.86	58	00:00:07
00:00:15	34.16	59.83	19.75	35.86	57	00:00:08
00:00:16	34.17	59.53	19.75	35.87	56	00:00:09
00:00:17	34.16	59.23	19.75	35.86	56	00:00:10
00:00:18	34.15	59.02	19.76	35.85	56	00:00:11
00:00:19	34.15	58.81	19.76	35.85	52	00:00:12
00:00:20	34.15	58.63	19.77	35.85	52	00:00:13
00:00:22	34.14	58.51	19.77	35.84	52	00:00:14
00:00:23	34.14	58.39	19.77	35.84	51	00:00:15
00:00:24	34.14	58.3	19.78	35.84	51	00:00:16
00:00:25	34.15	58.15	19.78	35.85	52	00:00:17
00:00:26	34.15	58.03	19.78	35.85	52	00:00:18
00:00:27	34.16	57.94	19.79	35.86	52	00:00:19
00:00:28	34.16	57.85	19.79	35.86	53	00:00:20
00:00:29	34.16	57.76	19.81	35.86	53	00:00:21
00:00:30	34.16	57.73	19.81	35.86	56	00:00:22
00:00:31	34.15	57.67	19.82	35.85	57	00:00:23
00:00:32	34.15	57.58	19.82	35.85	57	00:00:24
00:00:33	34.15	57.49	19.82	35.85	58	00:00:25
00:00:34	34.15	57.4	19.82	35.85	57	00:00:26
00:00:35	34.15	57.37	19.84	35.85	57	00:00:27
00:00:36	34.14	57.34	19.84	35.84	56	00:00:28
00:00:37	34.14	57.31	19.83	35.84	57	00:00:29
00:00:38	34.14	57.25	19.83	35.84	57	00:00:30
00:00:39	34.14	57.22	19.85	35.84	58	00:00:31
00:00:40	34.14	57.35	19.86	35.84	58	00:00:32
00:00:41	34.14	57.65	19.87	35.84	58	00:00:33
00:00:42	34.14	57.86	19.89	35.84	59	00:00:34
00:00:44	34.14	58.02	19.89	35.84	58	00:00:35
00:00:45	34.13	58.08	19.9	35.83	57	00:00:36
00:00:46	34.12	58.56	19.92	35.82	57	00:00:37
00:00:47	34.12	59.53	19.92	35.82	57	00:00:38
00:00:48	34.12	60.3	19.94	35.82	57	00:00:39
00:00:49	34.14	61.35	19.96	35.84	58	00:00:40
00:00:50	34.16	62.47	19.99	35.86	58	00:00:41
00:00:51	34.17	63.03	19.98	35.87	58	00:00:42
00:00:52	34.17	64.43	20.02	35.87	57	00:00:43
00:00:53	34.17	65.56	20.03	35.87	57	00:00:44
00:00:54	34.17	65.99	20.05	35.87	57	00:00:45
00:00:55	34.17	65.65	20.04	35.87	56	00:00:46
00:00:56	34.17	64.99	20.06	35.87	56	00:00:47
00:00:57	34.18	64.18	20.08	35.88	55	00:00:48
00:00:58	34.19	63.46	20.1	35.89	55	00:00:49
00:00:59	34.2	62.93	20.12	35.9	54	00:00:50
00:01:00	34.2	63.29	20.14	35.9	54	00:00:51
00:01:01	34.21	63.37	20.14	35.91	53	00:00:52
00:01:02	34.21	63.06	20.14	35.91	53	00:00:53
00:01:03	34.21	62.5	20.16	35.91	52	00:00:54
00:01:05	34.2	61.88	20.15	35.9	52	00:00:55
00:01:06	34.2	61.35	20.16	35.9	52	00:00:56
00:01:07	34.19	60.88	20.16	35.89	52	00:00:57
00:01:08	34.19	60.43	20.18	35.89	52	00:00:58
00:01:09	34.19	60.1	20.18	35.89	52	00:00:59
00:01:10	34.2	59.9	20.2	35.9	53	00:01:00
00:01:11	34.2	59.72	20.2	35.9	52	00:01:01
00:01:12	34.2	59.6	20.21	35.9	51	00:01:02
00:01:13	34.21	59.39	20.22	35.91	50	00:01:03
00:01:14	34.22	59.24	20.21	35.92	50	00:01:04
00:01:15	34.23	59.06	20.21	35.93	51	00:01:05
00:01:16	34.24	58.94	20.22	35.94	53	00:01:06
00:01:17	34.24	58.82	20.23	35.94	54	00:01:07
00:01:18	34.22	58.73	20.24	35.92	55	00:01:08
00:01:19	34.2	58.68	20.26	35.9	55	00:01:09
00:01:20	34.19	58.68	20.26	35.89	55	00:01:10
00:01:21	34.17	58.74	20.27	35.87	55	00:01:11
00:01:22	34.17	58.74	20.26	35.87	56	00:01:12
00:01:23	34.16	58.77	20.28	35.86	57	00:01:13
00:01:24	34.17	58.86	20.29	35.87	57	00:01:14
00:01:25	34.16	58.98	20.3	35.86	57	00:01:15
00:01:27	34.16	58.98	20.31	35.86	56	00:01:16
00:01:28	34.15	58.9	20.32	35.85	55	00:01:17
00:01:29	34.16	58.99	20.33	35.86	55	00:01:18
00:01:30	34.15	59.02	20.35	35.85	54	00:01:19
00:01:31	34.17	59.02	20.36	35.87	53	00:01:20
00:01:32	34.16	59.21	20.38	35.86	52	00:01:21
00:01:33	34.14	59.57	20.39	35.84	52	00:01:22
00:01:34	34.12	59.69	20.39	35.82	53	00:01:23
00:01:35	34.09	59.69	20.4	35.79	53	00:01:24
00:01:36	34.09	59.84	20.42	35.79	53	00:01:25
00:01:37	34.09	59.97	20.43	35.79	53	00:01:26
00:01:38	34.09	60	20.44	35.79	54	00:01:27
00:01:39	34.09	60.09	20.45	35.79	54	00:01:28
00:01:40	34.09	60	20.46	35.79	55	00:01:29
00:01:41	34.08	59.94	20.47	35.78	53	00:01:30
00:01:42	34.08	59.85	20.46	35.78	54	00:01:31
00:01:43	34.08	59.82	20.49	35.78	55	00:01:32
00:01:44	34.07	59.79	20.48	35.77	56	00:01:33
00:01:45	34.07	59.79	20.49	35.77	56	00:01:34
00:01:46	34.07	59.82	20.48	35.77	56	00:01:35
00:01:48	34.06	59.79	20.5	35.76	56	00:01:36
00:01:49	34.06	59.71	20.52	35.76	56	00:01:37
00:01:50	34.07	59.62	20.52	35.77	57	00:01:38
00:01:51	34.07	59.65	20.53	35.77	57	00:01:39
00:01:52	34.07	59.65	20.52	35.77	56	00:01:40
00:01:53	34.07	59.65	20.55	35.77	57	00:01:41
00:01:54	34.06	59.65	20.55	35.76	57	00:01:42
00:01:55	34.06	59.65	20.56	35.76	57	00:01:43
00:01:56	34.06	59.56	20.56	35.76	57	00:01:44
00:01:57	34.06	59.5	20.56	35.76	57	00:01:45
00:01:58	34.06	59.6	20.58	35.76	57	00:01:46
00:01:59	34.05	59.75	20.6	35.75	57	00:01:47
00:02:00	34.05	59.84	20.6	35.75	57	00:01:48
00:02:01	34.05	59.9	20.62	35.75	57	00:01:49
00:02:02	34.04	59.99	20.62	35.74	57	00:01:50
00:02:03	34.03	59.84	20.63	35.73	57	00:01:51
00:02:04	34.03	59.76	20.64	35.73	58	00:01:52
00:02:05	34.03	59.7	20.65	35.73	59	00:01:53
00:02:06	34.04	59.7	20.66	35.74	61	00:01:54
00:02:07	34.06	59.7	20.67	35.76	62	00:01:55
00:02:08	34.07	59.64	20.67	35.77	63	00:01:56
00:02:10	34.09	59.58	20.68	35.79	63	00:01:57
00:02:11	34.1	59.49	20.68	35.8	64	00:01:58
00:02:12	34.11	59.47	20.7	35.81	64	00:01:59
00:02:13	34.11	59.44	20.71	35.81	64	00:02:00
00:02:14	34.11	59.41	20.72	35.81	64	00:02:01
00:02:15	34.11	59.35	20.74	35.81	64	00:02:02
00:02:16	34.11	59.26	20.74	35.81	64	00:02:03
00:02:17	34.11	59.23	20.74	35.81	65	00:02:04
00:02:18	34.11	59.39	20.76	35.81	65	00:02:05
00:02:19	34.11	59.6	20.76	35.81	65	00:02:06
00:02:20	34.11	59.78	20.78	35.81	66	00:02:07
00:02:21	34.11	59.84	20.79	35.81	68	00:02:08
00:02:22	34.11	59.75	20.79	35.81	70	00:02:09
00:02:23	34.11	59.6	20.8	35.81	72	00:02:10
00:02:24	34.11	59.43	20.81	35.81	73	00:02:11
00:02:25	34.11	59.25	20.83	35.81	74	00:02:12
00:02:26	34.1	59.13	20.84	35.8	74	00:02:13
00:02:27	34.11	58.98	20.84	35.81	74	00:02:14
00:02:28	34.11	59.01	20.87	35.81	74	00:02:15
00:02:29	34.1	58.92	20.87	35.8	73	00:02:16
00:02:31	34.1	58.77	20.88	35.8	73	00:02:17
00:02:32	34.1	58.65	20.88	35.8	74	00:02:18
00:02:33	34.1	58.5	20.9	35.8	74	00:02:19
00:02:34	34.1	58.44	20.9	35.8	74	00:02:20
00:02:35	34.1	58.39	20.92	35.8	74	00:02:21
00:02:36	34.1	58.26	20.93	35.8	74	00:02:22
00:02:37	34.1	58.12	20.94	35.8	75	00:02:23
00:02:38	34.1	58.03	20.96	35.8	76	00:02:24
00:02:39	34.09	57.87	20.95	35.79	77	00:02:25
00:02:40	34.08	57.79	20.97	35.78	78	00:02:26
00:02:41	34.08	57.73	20.98	35.78	80	00:02:27
00:02:42	34.06	57.64	20.99	35.76	80	00:02:28
00:02:43	34.06	57.58	21	35.76	81	00:02:29
00:02:44	34.06	57.52	21.01	35.76	82	00:02:30
00:02:45	34.06	57.37	21.02	35.76	82	00:02:31
00:02:46	34.06	57.25	21.02	35.76	82	00:02:32
00:02:47	34.06	57.16	21.04	35.76	81	00:02:33
00:02:48	34.05	57.1	21.06	35.75	81	00:02:34
00:02:49	34.05	57.01	21.06	35.75	81	00:02:35
00:02:50	34.04	56.92	21.06	35.74	80	00:02:36
00:02:51	34.04	56.8	21.08	35.74	79	00:02:37
00:02:53	34.04	56.71	21.08	35.74	73	00:02:38
00:02:54	34.04	56.59	21.1	35.74	67	00:02:39
00:02:55	34.03	56.47	21.1	35.73	63	00:02:40
00:02:56	34.03	56.34	21.12	35.73	62	00:02:41
00:02:57	34.02	56.22	21.13	35.72	61	00:02:42
00:02:58	33.99	56.1	21.14	35.69	60	00:02:43
00:02:59	33.99	56.01	21.14	35.69	60	00:02:44
00:03:00	33.98	55.92	21.15	35.68	59	00:02:45
00:03:01	33.97	55.83	21.16	35.67	58	00:02:46
00:03:02	33.97	55.74	21.18	35.67	58	00:02:47
00:03:03	33.95	55.68	21.18	35.65	58	00:02:48
00:03:04	33.95	55.59	21.19	35.65	58	00:02:49
00:03:05	33.94	55.53	21.19	35.64	58	00:02:50
00:03:06	33.93	55.47	21.2	35.63	58	00:02:51
00:03:07	33.92	55.41	21.21	35.62	58	00:02:52
00:03:08	33.92	55.34	21.22	35.62	59	00:02:53
00:03:09	33.92	55.35	21.24	35.62	59	00:02:54
00:03:10	33.92	55.28	21.23	35.62	59	00:02:55
00:03:11	33.91	55.26	21.25	35.61	59	00:02:56
00:03:12	33.9	55.19	21.24	35.6	61	00:02:57
00:03:14	33.89	55.13	21.25	35.59	65	00:02:58
00:03:15	33.88	55.07	21.26	35.58	67	00:02:59
00:03:16	33.87	55.04	21.28	35.57	68	00:03:00
00:03:17	33.86	54.98	21.28	35.56	68	00:03:01
00:03:18	33.86	54.92	21.3	35.56	68	00:03:02
00:03:19	33.85	54.92	21.3	35.55	68	00:03:03
00:03:20	33.83	54.86	21.3	35.53	68	00:03:04
00:03:21	33.83	54.74	21.32	35.53	68	00:03:05
00:03:22	33.82	54.62	21.32	35.52	68	00:03:06
00:03:23	33.81	54.56	21.32	35.51	68	00:03:07
00:03:24	33.81	54.49	21.32	35.51	68	00:03:08
00:03:25	33.8	54.4	21.34	35.5	67	00:03:09
00:03:26	33.79	54.43	21.34	35.49	67	00:03:10
00:03:27	33.78	54.41	21.36	35.48	67	00:03:11
00:03:28	33.78	54.38	21.36	35.48	66	00:03:12
00:03:29	33.78	54.35	21.38	35.48	66	00:03:13
00:03:30	33.77	54.32	21.39	35.47	66	00:03:14
00:03:31	33.76	54.19	21.4	35.46	66	00:03:15
00:03:32	33.76	54.13	21.4	35.46	66	00:03:16
00:03:33	33.75	54.04	21.42	35.45	66	00:03:17
00:03:34	33.74	54.01	21.42	35.44	66	00:03:18
00:03:36	33.73	53.98	21.43	35.43	65	00:03:19
00:03:37	33.72	53.89	21.43	35.42	65	00:03:20
00:03:38	33.71	53.76	21.43	35.41	65	00:03:21
00:03:39	33.7	53.7	21.44	35.4	65	00:03:22
00:03:40	33.69	53.64	21.45	35.39	65	00:03:23
00:03:41	33.69	53.55	21.46	35.39	65	00:03:24
00:03:42	33.69	53.46	21.45	35.39	65	00:03:25
00:03:43	33.68	53.39	21.46	35.38	64	00:03:26
00:03:44	33.67	53.33	21.48	35.37	63	00:03:27
00:03:45	33.66	53.21	21.48	35.36	62	00:03:28
00:03:46	33.66	53.15	21.48	35.36	60	00:03:29
00:03:47	33.65	53.05	21.48	35.35	60	00:03:30
00:03:48	33.65	52.96	21.48	35.35	60	00:03:31
00:03:49	33.64	52.9	21.48	35.34	60	00:03:32
00:03:50	33.63	52.9	21.5	35.33	60	00:03:33
00:03:51	33.62	52.87	21.51	35.32	60	00:03:34
00:03:52	33.61	52.84	21.51	35.31	60	00:03:35
00:03:53	33.61	52.87	21.52	35.31	61	00:03:36
00:03:54	33.62	52.84	21.52	35.32	61	00:03:37
00:03:55	33.61	52.81	21.52	35.31	61	00:03:38
00:03:57	33.6	52.78	21.53	35.3	62	00:03:39
00:03:58	33.59	52.78	21.54	35.29	63	00:03:40
00:03:59	33.58	52.75	21.55	35.28	64	00:03:41
00:04:00	33.56	52.66	21.56	35.26	64	00:03:42
00:04:01	33.55	52.69	21.56	35.25	64	00:03:43
00:04:02	33.55	52.72	21.57	35.25	64	00:03:44
00:04:03	33.54	52.78	21.58	35.24	64	00:03:45
00:04:04	33.53	52.78	21.58	35.23	64	00:03:46
00:04:05	33.52	52.78	21.59	35.22	65	00:03:47
00:04:06	33.51	52.76	21.6	35.21	66	00:03:48
00:04:07	33.5	52.91	21.61	35.2	66	00:03:49
00:04:08	33.5	52.98	21.62	35.2	66	00:03:50
00:04:09	33.49	52.98	21.62	35.19	67	00:03:51
00:04:10	33.49	52.92	21.62	35.19	67	00:03:52
00:04:11	33.47	52.85	21.63	35.17	66	00:03:53
00:04:12	33.47	52.82	21.62	35.17	66	00:03:54
00:04:13	33.46	52.86	21.63	35.16	67	00:03:55
00:04:14	33.46	52.82	21.64	35.16	68	00:03:56
00:04:15	33.46	52.79	21.64	35.16	69	00:03:57
00:04:16	33.46	52.67	21.66	35.16	71	00:03:58
00:04:17	33.45	52.61	21.67	35.15	71	00:03:59
00:04:19	33.44	52.54	21.67	35.14	71	00:04:00
00:04:20	33.44	52.42	21.67	35.14	72	00:04:01
00:04:21	33.43	52.3	21.68	35.13	72	00:04:02
00:04:22	33.43	52.23	21.68	35.13	73	00:04:03
00:04:23	33.43	52.14	21.68	35.13	74	00:04:04
00:04:24	33.42	52.08	21.7	35.12	75	00:04:05
00:04:25	33.4	52.11	21.7	35.1	76	00:04:06
00:04:26	33.39	52.14	21.7	35.09	77	00:04:07
00:04:27	33.38	52.14	21.71	35.08	77	00:04:08
00:04:28	33.38	52.14	21.72	35.08	78	00:04:09
00:04:29	33.38	52.14	21.73	35.08	79	00:04:10
00:04:30	33.38	52.08	21.72	35.08	80	00:04:11
00:04:31	33.38	52.02	21.72	35.08	80	00:04:12
00:04:32	33.38	52.02	21.74	35.08	81	00:04:13
00:04:33	33.37	51.99	21.74	35.07	82	00:04:14
00:04:34	33.36	51.93	21.74	35.06	83	00:04:15
00:04:35	33.35	51.86	21.74	35.05	84	00:04:16
00:04:36	33.34	51.8	21.75	35.04	85	00:04:17
00:04:37	33.34	51.68	21.76	35.04	86	00:04:18
00:04:38	33.34	51.55	21.75	35.04	87	00:04:19
00:04:40	33.34	51.49	21.77	35.04	89	00:04:20
00:04:41	33.34	51.36	21.77	35.04	90	00:04:21
00:04:42	33.34	51.24	21.76	35.04	91	00:04:22
00:04:43	33.34	51.17	21.77	35.04	93	00:04:23
00:04:44	33.34	51.11	21.78	35.04	95	00:04:24
00:04:45	33.34	51.02	21.77	35.04	96	00:04:25
00:04:46	33.34	50.95	21.77	35.04	97	00:04:26
00:04:47	33.33	50.89	21.8	35.03	99	00:04:27
00:04:48	33.32	50.89	21.79	35.02	99	00:04:28
00:04:49	33.31	50.89	21.79	35.01	99	00:04:29
00:04:50	33.3	50.8	21.8	35	99	00:04:30
00:04:51	33.3	50.67	21.8	35	101	00:04:31
00:04:52	33.3	50.61	21.81	35	102	00:04:32
00:04:53	33.29	50.58	21.81	34.99	102	00:04:33
00:04:54	33.29	50.55	21.81	34.99	103	00:04:34
00:04:55	33.29	50.42	21.82	34.99	104	00:04:35
00:04:56	33.28	50.35	21.8	34.98	105	00:04:36
00:04:57	33.27	50.26	21.8	34.97	106	00:04:37
00:04:58	33.27	50.03	21.79	34.97	107	00:04:38
00:04:59	33.26	49.9	21.78	34.96	107	00:04:39
00:05:00	33.25	49.74	21.78	34.95	107	00:04:40
00:05:02	33.25	49.68	21.79	34.95	107	00:04:41
00:05:03	33.25	49.65	21.78	34.95	107	00:04:42
00:05:04	33.24	49.59	21.78	34.94	108	00:04:43
00:05:05	33.23	49.49	21.8	34.93	108	00:04:44
00:05:06	33.23	49.46	21.78	34.93	109	00:04:45
00:05:07	33.21	49.49	21.81	34.91	110	00:04:46
00:05:08	33.21	49.52	21.8	34.91	111	00:04:47
00:05:09	33.2	49.49	21.8	34.9	112	00:04:48
00:05:10	33.19	49.49	21.82	34.89	113	00:04:49
00:05:11	33.18	49.46	21.82	34.88	114	00:04:50
00:05:12	33.17	49.43	21.82	34.87	115	00:04:51
00:05:13	33.16	49.72	21.82	34.86	116	00:04:52
00:05:14	33.15	50.23	21.82	34.85	115	00:04:53
00:05:15	33.15	50.77	21.83	34.85	115	00:04:54
00:05:16	33.14	51.21	21.84	34.84	115	00:04:55
00:05:17	33.13	51.5	21.84	34.83	115	00:04:56
00:05:18	33.11	51.69	21.85	34.81	115	00:04:57
00:05:19	33.11	51.85	21.86	34.81	115	00:04:58
00:05:20	33.1	52.07	21.87	34.8	115	00:04:59
00:05:21	33.09	52.42	21.86	34.79	115	00:05:00
00:05:23	33.08	52.76	21.87	34.78	115	00:05:01
00:05:24	33.08	53.11	21.88	34.78	115	00:05:02
00:05:25	33.07	53.39	21.88	34.77	115	00:05:03
00:05:26	33.07	53.61	21.89	34.77	117	00:05:04
00:05:27	33.07	53.8	21.9	34.77	118	00:05:05
00:05:28	33.07	53.98	21.9	34.77	118	00:05:06
00:05:29	33.07	54.08	21.91	34.77	119	00:05:07
00:05:30	33.06	54.11	21.91	34.76	119	00:05:08
00:05:31	33.05	54.21	21.92	34.75	121	00:05:09
00:05:32	33.04	54.33	21.93	34.74	122	00:05:10
00:05:33	33.04	54.33	21.94	34.74	123	00:05:11
00:05:34	33.04	54.4	21.94	34.74	123	00:05:12
00:05:35	33.04	54.64	21.96	34.74	124	00:05:13
00:05:36	33.04	54.8	21.95	34.74	124	00:05:14
00:05:37	33.03	54.86	21.96	34.73	124	00:05:15
00:05:38	33.03	54.89	21.97	34.73	124	00:05:16
00:05:39	33.02	54.8	21.98	34.72	124	00:05:17
00:05:40	33.02	54.83	21.99	34.72	124	00:05:18
00:05:41	33.01	54.93	21.99	34.71	124	00:05:19
00:05:42	33.02	55.08	22	34.72	123	00:05:20
00:05:43	33.01	55.27	22	34.71	123	00:05:21
00:05:45	33.01	55.46	22	34.71	123	00:05:22
00:05:46	33	55.58	22	34.7	123	00:05:23
00:05:47	33	55.71	22.01	34.7	123	00:05:24
00:05:48	32.99	55.92	22.01	34.69	123	00:05:25
00:05:49	32.99	56.2	22.03	34.69	123	00:05:26
00:05:50	32.99	56.45	22.04	34.69	123	00:05:27
00:05:51	32.99	56.63	22.05	34.69	123	00:05:28
00:05:52	32.99	56.82	22.06	34.69	123	00:05:29
00:05:53	32.99	56.88	22.06	34.69	122	00:05:30
00:05:54	32.99	56.95	22.07	34.69	122	00:05:31
00:05:55	32.99	57.04	22.08	34.69	122	00:05:32
00:05:56	32.99	57.19	22.08	34.69	122	00:05:33
00:05:57	32.99	57.38	22.09	34.69	122	00:05:34
00:05:58	32.99	57.47	22.1	34.69	122	00:05:35
00:05:59	32.99	57.56	22.12	34.69	121	00:05:36
00:06:00	32.99	57.62	22.12	34.69	121	00:05:37
00:06:01	32.99	57.69	22.12	34.69	122	00:05:38
00:06:02	32.99	57.75	22.13	34.69	122	00:05:39
00:06:03	32.98	57.69	22.14	34.68	122	00:05:40
00:06:04	32.98	57.69	22.14	34.68	123	00:05:41
00:06:06	32.98	57.72	22.16	34.68	123	00:05:42
00:06:07	32.98	57.69	22.16	34.68	123	00:05:43
00:06:08	32.98	57.66	22.17	34.68	122	00:05:44
00:06:09	32.99	57.6	22.18	34.69	117	00:05:45
00:06:10	32.99	57.63	22.18	34.69	106	00:05:46
00:06:11	32.99	57.66	22.18	34.69	97	00:05:47
00:06:12	32.99	57.66	22.19	34.69	93	00:05:48
00:06:13	32.99	57.76	22.18	34.69	91	00:05:49
00:06:14	32.99	57.82	22.2	34.69	91	00:05:50
00:06:15	32.99	57.97	22.21	34.69	90	00:05:51
00:06:16	32.99	58.07	22.22	34.69	91	00:05:52
00:06:17	32.99	58.07	22.22	34.69	91	00:05:53
00:06:18	32.99	58.13	22.23	34.69	91	00:05:54
00:06:19	32.99	58.19	22.24	34.69	92	00:05:55
00:06:20	32.99	58.31	22.24	34.69	92	00:05:56
00:06:21	32.99	58.4	22.24	34.69	92	00:05:57
00:06:22	32.99	58.47	22.25	34.69	93	00:05:58
00:06:23	32.99	58.5	22.26	34.69	93	00:05:59
00:06:24	32.99	58.53	22.25	34.69	94	00:06:00
00:06:25	32.99	58.56	22.26	34.69	95	00:06:01
00:06:27	32.99	58.65	22.27	34.69	96	00:06:02
00:06:28	32.99	58.74	22.28	34.69	96	00:06:03
00:06:29	32.99	58.81	22.28	34.69	97	00:06:04
00:06:30	32.99	58.84	22.29	34.69	98	00:06:05
00:06:31	32.99	58.9	22.31	34.69	98	00:06:06
00:06:32	33	58.99	22.32	34.7	98	00:06:07
00:06:33	33	58.96	22.34	34.7	99	00:06:08
00:06:34	33	59.05	22.34	34.7	100	00:06:09
00:06:35	33	59	22.34	34.7	101	00:06:10
00:06:36	33	59.06	22.34	34.7	101	00:06:11
00:06:37	33.01	59	22.36	34.71	101	00:06:12
00:06:38	33.01	59	22.36	34.71	102	00:06:13
00:06:39	33.01	59	22.38	34.71	104	00:06:14
00:06:40	33.01	59	22.38	34.71	105	00:06:15
00:06:41	33.01	59.03	22.39	34.71	105	00:06:16
00:06:42	33.01	59.12	22.39	34.71	105	00:06:17
00:06:43	33.03	59.16	22.4	34.73	106	00:06:18
00:06:45	33.04	59.19	22.41	34.74	106	00:06:19
00:06:46	33.04	59.19	22.41	34.74	107	00:06:20
00:06:47	33.04	59.25	22.43	34.74	108	00:06:21
00:06:48	33.04	59.43	22.44	34.74	108	00:06:22
00:06:49	33.03	59.61	22.43	34.73	109	00:06:23
00:06:50	33.03	59.74	22.44	34.73	111	00:06:24
00:06:51	33.04	59.86	22.46	34.74	112	00:06:25
00:06:52	33.05	59.95	22.46	34.75	112	00:06:26
00:06:53	33.06	60.04	22.46	34.76	112	00:06:27
00:06:54	33.07	60.13	22.48	34.77	112	00:06:28
00:06:55	33.07	60.17	22.48	34.77	113	00:06:29
00:06:56	33.07	60.29	22.5	34.77	112	00:06:30
00:06:57	33.07	60.5	22.5	34.77	113	00:06:31
00:06:58	33.07	60.62	22.52	34.77	113	00:06:32
00:07:00	33.07	60.83	22.53	34.77	113	00:06:33
00:07:01	33.07	60.95	22.53	34.77	113	00:06:34
00:07:02	33.07	61.04	22.53	34.77	113	00:06:35
00:07:03	33.07	61.13	22.54	34.77	113	00:06:36
00:07:04	33.07	61.34	22.55	34.77	114	00:06:37
00:07:05	33.07	61.4	22.55	34.77	118	00:06:38
00:07:06	33.07	61.59	22.57	34.77	120	00:06:39
00:07:07	33.07	61.76	22.57	34.77	121	00:06:40
00:07:08	33.07	61.83	22.58	34.77	123	00:06:41
00:07:09	33.07	61.77	22.6	34.77	125	00:06:42
00:07:10	33.07	61.68	22.61	34.77	128	00:06:43
00:07:11	33.07	61.59	22.61	34.77	129	00:06:44
00:07:12	33.07	61.5	22.62	34.77	130	00:06:45
00:07:13	33.07	61.48	22.63	34.77	130	00:06:46
00:07:14	33.07	61.48	22.65	34.77	131	00:06:47
00:07:16	33.07	61.54	22.65	34.77	132	00:06:48
00:07:17	33.08	61.51	22.65	34.78	134	00:06:49
00:07:18	33.09	61.57	22.66	34.79	135	00:06:50
00:07:19	33.09	61.66	22.67	34.79	135	00:06:51
00:07:20	33.1	61.72	22.67	34.8	136	00:06:52
00:07:21	33.1	61.78	22.68	34.8	137	00:06:53
00:07:22	33.1	61.75	22.69	34.8	137	00:06:54
00:07:23	33.11	61.75	22.7	34.81	137	00:06:55
00:07:24	33.1	61.76	22.7	34.8	137	00:06:56
00:07:25	33.11	61.76	22.71	34.81	137	00:06:57
00:07:26	33.11	61.67	22.72	34.81	136	00:06:58
00:07:27	33.11	61.67	22.72	34.81	136	00:06:59
00:07:28	33.11	61.7	22.72	34.81	136	00:07:00
00:07:29	33.13	61.58	22.74	34.83	136	00:07:01
00:07:31	33.13	61.52	22.74	34.83	136	00:07:02
00:07:32	33.13	61.59	22.75	34.83	136	00:07:03
00:07:33	33.13	61.59	22.77	34.83	135	00:07:04
00:07:34	33.13	61.38	22.77	34.83	135	00:07:05
00:07:35	33.12	61.44	22.77	34.82	135	00:07:06
00:07:36	33.12	61.53	22.78	34.82	136	00:07:07
00:07:37	33.13	61.62	22.8	34.83	136	00:07:08
00:07:38	33.14	61.74	22.8	34.84	136	00:07:09
00:07:39	33.15	61.83	22.82	34.85	137	00:07:10
00:07:40	33.15	61.77	22.82	34.85	138	00:07:11
00:07:41	33.15	61.8	22.82	34.85	139	00:07:12
00:07:42	33.15	61.86	22.84	34.85	139	00:07:13
00:07:43	33.15	62.08	22.84	34.85	139	00:07:14
00:07:44	33.15	62.14	22.86	34.85	138	00:07:15
00:07:45	33.16	62.26	22.88	34.86	137	00:07:16
00:07:47	33.15	62.44	22.87	34.85	136	00:07:17
00:07:48	33.15	62.62	22.89	34.85	136	00:07:18
00:07:49	33.15	62.65	22.9	34.85	137	00:07:19
00:07:50	33.15	62.71	22.9	34.85	137	00:07:20
00:07:51	33.17	62.71	22.92	34.87	139	00:07:21
00:07:52	33.18	62.62	22.93	34.88	140	00:07:22
00:07:53	33.19	62.66	22.93	34.89	141	00:07:23
00:07:54	33.19	62.72	22.94	34.89	141	00:07:24
00:07:55	33.2	62.72	22.94	34.9	140	00:07:25
00:07:56	33.19	62.72	22.95	34.89	140	00:07:26
00:07:57	33.19	62.69	22.96	34.89	140	00:07:27
00:07:58	33.19	62.6	22.96	34.89	139	00:07:28
00:07:59	33.2	62.51	22.98	34.9	138	00:07:29
00:08:00	33.2	62.6	22.98	34.9	137	00:07:30
00:08:02	33.21	62.64	22.99	34.91	135	00:07:31
00:08:03	33.21	62.67	23.01	34.91	129	00:07:32
00:08:04	33.21	62.58	23.01	34.91	122	00:07:33
00:08:05	33.21	62.4	23.04	34.91	118	00:07:34
00:08:06	33.21	62.2	23.02	34.91	116	00:07:35
00:08:07	33.21	61.93	23.04	34.91	109	00:07:36
00:08:08	33.21	61.78	23.06	34.91	103	00:07:37
00:08:09	33.21	61.6	23.07	34.91	100	00:07:38
00:08:10	33.21	61.46	23.07	34.91	101	00:07:39
00:08:11	33.21	61.4	23.08	34.91	101	00:07:40
00:08:12	33.21	61.4	23.09	34.91	102	00:07:41
00:08:13	33.21	61.43	23.09	34.91	100	00:07:42
00:08:14	33.21	61.46	23.11	34.91	98	00:07:43
00:08:15	33.22	61.4	23.12	34.92	96	00:07:44
00:08:16	33.23	61.28	23.12	34.93	95	00:07:45
00:08:18	33.23	61.22	23.12	34.93	94	00:07:46
00:08:19	33.23	61.11	23.13	34.93	94	00:07:47
00:08:20	33.24	60.96	23.15	34.94	94	00:07:48
00:08:21	33.23	60.75	23.15	34.93	93	00:07:49
00:08:22	33.23	60.57	23.15	34.93	93	00:07:50
00:08:23	33.23	60.57	23.17	34.93	93	00:07:51
00:08:24	33.23	60.48	23.18	34.93	92	00:07:52
00:08:25	33.23	60.49	23.18	34.93	91	00:07:53
00:08:26	33.22	60.55	23.19	34.92	90	00:07:54
00:08:27	33.23	60.58	23.2	34.93	89	00:07:55
00:08:28	33.22	60.46	23.22	34.92	89	00:07:56
00:08:29	33.22	60.31	23.22	34.92	89	00:07:57
00:08:30	33.23	60.25	23.22	34.93	88	00:07:58
00:08:31	33.23	60.25	23.24	34.93	88	00:07:59
00:08:33	33.23	60.25	23.24	34.93	87	00:08:00
00:08:34	33.24	60.28	23.26	34.94	89	00:08:01
00:08:35	33.25	60.29	23.27	34.95	89	00:08:02
00:08:36	33.25	60.32	23.28	34.95	89	00:08:03
00:08:37	33.25	60.38	23.28	34.95	89	00:08:04
00:08:38	33.25	60.41	23.3	34.95	89	00:08:05
00:08:39	33.25	60.38	23.3	34.95	89	00:08:06
00:08:40	33.26	60.38	23.3	34.96	89	00:08:07
00:08:41	33.26	60.38	23.31	34.96	88	00:08:08
00:08:42	33.26	60.38	23.32	34.96	87	00:08:09
00:08:43	33.26	60.45	23.33	34.96	87	00:08:10
00:08:44	33.26	60.51	23.34	34.96	87	00:08:11
00:08:45	33.25	60.54	23.33	34.95	87	00:08:12
00:08:46	33.26	60.51	23.36	34.96	87	00:08:13
00:08:47	33.27	60.39	23.36	34.97	87	00:08:14
00:08:49	33.28	60.36	23.36	34.98	87	00:08:15
00:08:50	33.28	60.36	23.36	34.98	86	00:08:16
00:08:51	33.29	60.33	23.37	34.99	86	00:08:17
00:08:52	33.29	60.33	23.38	34.99	85	00:08:18
00:08:53	33.28	60.28	23.39	34.98	85	00:08:19
00:08:54	33.28	60.28	23.4	34.98	85	00:08:20
00:08:55	33.28	60.22	23.41	34.98	85	00:08:21
00:08:56	33.28	60.19	23.42	34.98	85	00:08:22
00:08:57	33.29	60.13	23.43	34.99	85	00:08:23
00:08:58	33.29	60.1	23.42	34.99	85	00:08:24
00:08:59	33.3	60.19	23.44	35	84	00:08:25
00:09:00	33.3	60.28	23.46	35	82	00:08:26
00:09:01	33.3	60.32	23.47	35	80	00:08:27
00:09:02	33.3	60.26	23.48	35	80	00:08:28
00:09:04	33.3	60.2	23.47	35	81	00:08:29
00:09:05	33.3	60.2	23.48	35	81	00:08:30
00:09:06	33.3	60.14	23.48	35	81	00:08:31
00:09:07	33.3	60.05	23.5	35	82	00:08:32
00:09:08	33.3	59.96	23.5	35	81	00:08:33
00:09:09	33.3	59.9	23.5	35	81	00:08:34
00:09:10	33.3	59.84	23.52	35	79	00:08:35
00:09:11	33.3	59.9	23.52	35	76	00:08:36
00:09:12	33.3	59.93	23.52	35	72	00:08:37
00:09:13	33.3	59.9	23.53	35	69	00:08:38
00:09:14	33.3	59.97	23.54	35	67	00:08:39
00:09:15	33.31	59.97	23.54	35.01	67	00:08:40
00:09:16	33.32	59.91	23.55	35.02	68	00:08:41
00:09:17	33.33	59.82	23.57	35.03	68	00:08:42
00:09:18	33.32	59.85	23.56	35.02	68	00:08:43
00:09:20	33.33	59.85	23.57	35.03	67	00:08:44
00:09:21	33.32	59.82	23.58	35.02	68	00:08:45
00:09:22	33.32	59.79	23.59	35.02	69	00:08:46
00:09:23	33.31	59.82	23.58	35.01	69	00:08:47
00:09:24	33.31	59.79	23.6	35.01	66	00:08:48
00:09:25	33.32	59.82	23.6	35.02	65	00:08:49
00:09:26	33.32	59.86	23.62	35.02	65	00:08:50
00:09:27	33.33	59.83	23.62	35.03	65	00:08:51
00:09:28	33.34	59.8	23.62	35.04	65	00:08:52
00:09:29	33.34	59.8	23.64	35.04	65	00:08:53
00:09:30	33.34	59.8	23.65	35.04	66	00:08:54
00:09:31	33.34	59.77	23.65	35.04	65	00:08:55
00:09:32	33.34	59.8	23.65	35.04	69	00:08:56
00:09:33	33.34	59.8	23.66	35.04	73	00:08:57
00:09:35	33.34	59.77	23.67	35.04	75	00:08:58
00:09:36	33.34	59.8	23.68	35.04	76	00:08:59
00:09:37	33.35	59.78	23.68	35.05	76	00:09:00
00:09:38	33.36	59.78	23.69	35.06	76	00:09:01
00:09:39	33.36	59.87	23.7	35.06	76	00:09:02
00:09:40	33.37	59.9	23.71	35.07	76	00:09:03
00:09:41	33.37	60.05	23.7	35.07	75	00:09:04
00:09:42	33.37	59.99	23.72	35.07	74	00:09:05
00:09:43	33.38	59.93	23.73	35.08	69	00:09:06
00:09:44	33.38	59.94	23.74	35.08	65	00:09:07
00:09:45	33.38	60	23.74	35.08	66	00:09:08
00:09:46	33.38	59.97	23.74	35.08	66	00:09:09
00:09:47	33.38	59.91	23.75	35.08	66	00:09:10
00:09:48	33.38	59.88	23.76	35.08	64	00:09:11
00:09:49	33.38	59.82	23.76	35.08	63	00:09:12
00:09:51	33.38	59.82	23.78	35.08	61	00:09:13
00:09:52	33.38	59.82	23.78	35.08	61	00:09:14
00:09:53	33.38	59.82	23.79	35.08	62	00:09:15
00:09:54	33.38	59.76	23.78	35.08	63	00:09:16
00:09:55	33.38	59.79	23.8	35.08	63	00:09:17
00:09:56	33.38	59.83	23.8	35.08	64	00:09:18
00:09:57	33.38	59.83	23.8	35.08	65	00:09:19
00:09:58	33.38	59.89	23.82	35.08	65	00:09:20
00:09:59	33.38	59.89	23.82	35.08	66	00:09:21
00:10:00	33.38	59.83	23.82	35.08	66	00:09:22
00:10:01	33.39	59.86	23.83	35.09	66	00:09:23
00:10:02	33.39	59.89	23.83	35.09	67	00:09:24
00:10:03	33.39	59.89	23.85	35.09	67	00:09:25
00:10:04	33.4	59.92	23.85	35.1	67	00:09:26
00:10:06	33.4	59.89	23.86	35.1	67	00:09:27
00:10:07	33.4	59.84	23.86	35.1	67	00:09:28
00:10:08	33.4	59.72	23.87	35.1	67	00:09:29
00:10:09	33.41	59.66	23.88	35.11	67	00:09:30
00:10:10	33.41	59.54	23.9	35.11	67	00:09:31
00:10:11	33.41	59.54	23.9	35.11	66	00:09:32
00:10:12	33.42	59.75	23.92	35.12	65	00:09:33
00:10:13	33.42	59.91	23.93	35.12	64	00:09:34
00:10:14	33.42	59.97	23.93	35.12	63	00:09:35
00:10:15	33.42	60	23.94	35.12	63	00:09:36
00:10:16	33.42	60.12	23.96	35.12	64	00:09:37
00:10:17	33.42	60.21	23.96	35.12	65	00:09:38
00:10:18	33.42	60.22	23.98	35.12	66	00:09:39
00:10:19	33.41	60.19	23.98	35.11	66	00:09:40
00:10:20	33.42	60.19	23.99	35.12	66	00:09:41
00:10:22	33.42	60.16	24	35.12	66	00:09:42
00:10:23	33.42	60.22	24.01	35.12	65	00:09:43
00:10:24	33.42	60.25	24.02	35.12	66	00:09:44
00:10:25	33.42	60.28	24.02	35.12	66	00:09:45
00:10:26	33.41	60.34	24.03	35.11	66	00:09:46
00:10:27	33.41	60.35	24.03	35.11	67	00:09:47
00:10:28	33.41	60.29	24.05	35.11	68	00:09:48
00:10:29	33.42	60.26	24.05	35.12	68	00:09:49
00:10:30	33.43	60.29	24.06	35.13	69	00:09:50
00:10:31	33.43	60.26	24.06	35.13	69	00:09:51
00:10:32	33.43	60.26	24.07	35.13	69	00:09:52
00:10:33	33.43	60.32	24.09	35.13	68	00:09:53
00:10:34	33.43	60.48	24.1	35.13	67	00:09:54
00:10:35	33.43	60.57	24.1	35.13	67	00:09:55
00:10:37	33.43	60.66	24.12	35.13	65	00:09:56
00:10:38	33.43	60.63	24.13	35.13	64	00:09:57
00:10:39	33.43	60.6	24.14	35.13	63	00:09:58
00:10:40	33.43	60.6	24.14	35.13	63	00:09:59
00:10:41	33.43	60.63	24.15	35.13	63	00:10:00
00:10:42	33.43	60.7	24.16	35.13	60	00:10:01
00:10:43	33.43	60.76	24.17	35.13	58	00:10:02
00:10:44	33.43	60.76	24.17	35.13	56	00:10:03
00:10:45	33.43	60.79	24.19	35.13	55	00:10:04
00:10:46	33.43	60.76	24.19	35.13	55	00:10:05
00:10:47	33.43	60.76	24.2	35.13	58	00:10:06
00:10:48	33.44	60.74	24.22	35.14	59	00:10:07
00:10:49	33.44	60.71	24.21	35.14	58	00:10:08
00:10:50	33.43	60.71	24.22	35.13	57	00:10:09
00:10:51	33.43	60.86	24.23	35.13	57	00:10:10
00:10:53	33.44	60.95	24.25	35.14	57	00:10:11
00:10:54	33.44	60.92	24.25	35.14	58	00:10:12
00:10:55	33.44	60.93	24.27	35.14	58	00:10:13
00:10:56	33.46	61.29	24.28	35.16	61	00:10:14
00:10:57	33.46	61.41	24.29	35.16	61	00:10:15
00:10:58	33.46	61.47	24.3	35.16	61	00:10:16
00:10:59	33.46	61.5	24.3	35.16	60	00:10:17
00:11:00	33.46	61.53	24.32	35.16	59	00:10:18
00:11:01	33.46	61.54	24.32	35.16	59	00:10:19
00:11:02	33.46	61.51	24.32	35.16	60	00:10:20
00:11:03	33.46	61.39	24.33	35.16	58	00:10:21
00:11:04	33.47	61.36	24.34	35.17	56	00:10:22
00:11:05	33.47	61.36	24.35	35.17	56	00:10:23
00:11:06	33.47	61.36	24.36	35.17	55	00:10:24
00:11:08	33.47	61.27	24.35	35.17	55	00:10:25
00:11:09	33.47	61.24	24.37	35.17	56	00:10:26
00:11:10	33.47	61.24	24.37	35.17	57	00:10:27
00:11:11	33.47	61.21	24.37	35.17	58	00:10:28
00:11:12	33.47	61.06	24.39	35.17	59	00:10:29
00:11:13	33.48	60.86	24.39	35.18	59	00:10:30
00:11:14	33.48	60.7	24.4	35.18	59	00:10:31
00:11:15	33.49	60.64	24.41	35.19	60	00:10:32
00:11:16	33.49	60.65	24.42	35.19	60	00:10:33
00:11:17	33.49	60.65	24.43	35.19	60	00:10:34
00:11:18	33.49	60.68	24.44	35.19	60	00:10:35
00:11:19	33.49	60.71	24.44	35.19	59	00:10:36
00:11:20	33.49	60.74	24.44	35.19	56	00:10:37
00:11:21	33.5	60.74	24.45	35.2	55	00:10:38
00:11:22	33.51	60.71	24.46	35.21	54	00:10:39
00:11:24	33.51	60.69	24.47	35.21	52	00:10:40
00:11:25	33.52	60.69	24.5	35.22	51	00:10:41
00:11:26	33.52	60.69	24.49	35.22	51	00:10:42
00:11:27	33.52	60.66	24.51	35.22	50	00:10:43
00:11:28	33.52	60.66	24.52	35.22	50	00:10:44
00:11:29	33.52	60.6	24.52	35.22	50	00:10:45
00:11:30	33.52	60.54	24.52	35.22	49	00:10:46
00:11:31	33.52	60.51	24.53	35.22	50	00:10:47
00:11:32	33.52	60.42	24.54	35.22	50	00:10:48
00:11:33	33.52	60.36	24.54	35.22	50	00:10:49
00:11:34	33.52	60.37	24.54	35.22	49	00:10:50
00:11:35	33.52	60.34	24.56	35.22	49	00:10:51
00:11:36	33.52	60.31	24.57	35.22	49	00:10:52
00:11:37	33.52	60.28	24.58	35.22	48	00:10:53
00:11:39	33.52	60.31	24.58	35.22	48	00:10:54
00:11:40	33.52	60.4	24.6	35.22	50	00:10:55
00:11:41	33.52	60.5	24.61	35.22	50	00:10:56
00:11:42	33.52	60.56	24.62	35.22	52	00:10:57
00:11:43	33.52	60.62	24.63	35.22	53	00:10:58
00:11:44	33.52	60.62	24.64	35.22	53	00:10:59
00:11:45	33.52	60.59	24.64	35.22	55	00:11:00
00:11:46	33.52	60.5	24.64	35.22	55	00:11:01
00:11:47	33.52	60.44	24.64	35.22	55	00:11:02
00:11:48	33.52	60.44	24.65	35.22	55	00:11:03
00:11:49	33.52	60.5	24.66	35.22	56	00:11:04
00:11:50	33.52	60.53	24.67	35.22	56	00:11:05
00:11:51	33.52	60.57	24.68	35.22	56	00:11:06
00:11:52	33.52	60.6	24.69	35.22	56	00:11:07
00:11:53	33.52	60.6	24.7	35.22	56	00:11:08
00:11:55	33.52	60.6	24.7	35.22	55	00:11:09
00:11:56	33.52	60.51	24.71	35.22	55	00:11:10
00:11:57	33.53	60.48	24.71	35.23	54	00:11:11
00:11:58	33.53	60.48	24.72	35.23	52	00:11:12
00:11:59	33.53	60.48	24.73	35.23	51	00:11:13
00:12:00	33.53	60.45	24.73	35.23	52	00:11:14
00:12:01	33.52	60.45	24.74	35.22	51	00:11:15
00:12:02	33.52	60.43	24.74	35.22	50	00:11:16
00:12:03	33.52	60.33	24.74	35.22	51	00:11:17
00:12:04	33.52	60.33	24.74	35.22	51	00:11:18
00:12:05	33.52	60.34	24.77	35.22	51	00:11:19
00:12:06	33.52	60.43	24.76	35.22	51	00:11:20
00:12:07	33.52	60.46	24.76	35.22	53	00:11:21
00:12:08	33.52	60.31	24.77	35.22	52	00:11:22
00:12:10	33.52	60.16	24.78	35.22	53	00:11:23
00:12:11	33.53	60.19	24.79	35.23	54	00:11:24
00:12:12	33.53	60.37	24.8	35.23	57	00:11:25
00:12:13	33.54	60.5	24.82	35.24	59	00:11:26
00:12:14	33.54	60.62	24.81	35.24	60	00:11:27
00:12:15	33.54	60.56	24.83	35.24	61	00:11:28
00:12:16	33.53	60.38	24.84	35.23	62	00:11:29
00:12:17	33.53	60.47	24.83	35.23	63	00:11:30
00:12:18	33.53	60.59	24.84	35.23	63	00:11:31
00:12:19	33.54	60.74	24.83	35.24	63	00:11:32
00:12:20	33.54	60.78	24.85	35.24	62	00:11:33
00:12:21	33.55	60.81	24.86	35.25	63	00:11:34
00:12:22	33.55	60.81	24.86	35.25	63	00:11:35
00:12:23	33.56	60.69	24.87	35.26	63	00:11:36
00:12:24	33.56	60.81	24.88	35.26	62	00:11:37
00:12:26	33.56	60.66	24.87	35.26	61	00:11:38
00:12:27	33.56	60.75	24.89	35.26	59	00:11:39
00:12:28	33.56	60.81	24.9	35.26	59	00:11:40
00:12:29	33.56	60.84	24.9	35.26	59	00:11:41
00:12:30	33.56	60.84	24.9	35.26	58	00:11:42
00:12:31	33.56	60.87	24.9	35.26	59	00:11:43
00:12:32	33.56	60.97	24.91	35.26	59	00:11:44
00:12:33	33.56	61	24.92	35.26	58	00:11:45
00:12:34	33.56	61.15	24.93	35.26	58	00:11:46
00:12:35	33.56	61.12	24.93	35.26	59	00:11:47
00:12:36	33.57	61.18	24.93	35.27	60	00:11:48
00:12:37	33.58	61.28	24.95	35.28	62	00:11:49
00:12:38	33.58	61.43	24.96	35.28	64	00:11:50
00:12:39	33.58	61.45	24.95	35.28	66	00:11:51
00:12:40	33.59	61.34	24.96	35.29	67	00:11:52
00:12:42	33.59	61.34	24.96	35.29	67	00:11:53
00:12:43	33.59	61.34	24.98	35.29	67	00:11:54
00:12:44	33.6	61.25	24.98	35.3	66	00:11:55
00:12:45	33.61	61.16	24.98	35.31	65	00:11:56
00:12:46	33.61	61.07	25	35.31	65	00:11:57
00:12:47	33.61	61.04	25	35.31	66	00:11:58
00:12:48	33.61	61.01	25.01	35.31	66	00:11:59
00:12:49	33.61	60.95	25	35.31	66	00:12:00
00:12:50	33.61	60.95	25.02	35.31	66	00:12:01
00:12:51	33.61	61.01	25.02	35.31	66	00:12:02
00:12:52	33.61	61.01	25.04	35.31	66	00:12:03
00:12:53	33.61	61.02	25.04	35.31	65	00:12:04
00:12:54	33.61	60.93	25.04	35.31	64	00:12:05
00:12:55	33.61	60.9	25.05	35.31	62	00:12:06
00:12:57	33.61	60.84	25.06	35.31	61	00:12:07
00:12:58	33.61	60.75	25.07	35.31	61	00:12:08
00:12:59	33.61	60.75	25.06	35.31	61	00:12:09
00:13:00	33.61	60.84	25.08	35.31	60	00:12:10
00:13:01	33.61	60.87	25.08	35.31	59	00:12:11
00:13:02	33.61	60.87	25.08	35.31	59	00:12:12
00:13:03	33.62	60.94	25.11	35.32	59	00:12:13
00:13:04	33.63	60.97	25.11	35.33	59	00:12:14
00:13:05	33.64	61.03	25.11	35.34	59	00:12:15
00:13:06	33.64	61.09	25.12	35.34	58	00:12:16
00:13:07	33.65	61.12	25.14	35.35	58	00:12:17
00:13:08	33.65	61.21	25.14	35.35	58	00:12:18
00:13:09	33.65	61.21	25.14	35.35	58	00:12:19
00:13:10	33.65	61.18	25.15	35.35	58	00:12:20
00:13:11	33.65	61.15	25.16	35.35	59	00:12:21
00:13:13	33.65	61.13	25.16	35.35	59	00:12:22
00:13:14	33.64	61.13	25.17	35.34	59	00:12:23
00:13:15	33.64	61.16	25.18	35.34	59	00:12:24
00:13:16	33.64	61.22	25.18	35.34	60	00:12:25
00:13:17	33.65	61.22	25.18	35.35	60	00:12:26
00:13:18	33.67	61.19	25.19	35.37	61	00:12:27
00:13:19	33.68	61.16	25.2	35.38	61	00:12:28
00:13:20	33.69	61.19	25.2	35.39	62	00:12:29
00:13:21	33.69	61.17	25.21	35.39	63	00:12:30
00:13:22	33.69	61.13	25.23	35.39	63	00:12:31
00:13:23	33.69	61.08	25.22	35.39	63	00:12:32
00:13:24	33.69	61.01	25.24	35.39	64	00:12:33
00:13:25	33.69	60.96	25.24	35.39	64	00:12:34
00:13:26	33.69	60.87	25.25	35.39	65	00:12:35
00:13:28	33.69	60.87	25.26	35.39	66	00:12:36
00:13:29	33.69	60.99	25.28	35.39	66	00:12:37
00:13:30	33.69	61.08	25.28	35.39	67	00:12:38
00:13:31	33.69	61.08	25.28	35.39	68	00:12:39
00:13:32	33.69	60.96	25.28	35.39	69	00:12:40
00:13:33	33.69	60.85	25.3	35.39	69	00:12:41
00:13:34	33.69	60.82	25.31	35.39	69	00:12:42
00:13:35	33.69	60.79	25.3	35.39	69	00:12:43
00:13:36	33.7	60.82	25.31	35.4	70	00:12:44
00:13:37	33.71	60.67	25.33	35.41	70	00:12:45
00:13:38	33.72	60.73	25.34	35.42	70	00:12:46
00:13:39	33.72	60.76	25.34	35.42	69	00:12:47
00:13:40	33.73	60.67	25.36	35.43	69	00:12:48
00:13:41	33.72	60.64	25.37	35.42	70	00:12:49
00:13:42	33.71	60.67	25.36	35.41	71	00:12:50
00:13:44	33.71	60.67	25.37	35.41	71	00:12:51
00:13:45	33.72	60.74	25.38	35.42	73	00:12:52
00:13:46	33.72	60.68	25.39	35.42	75	00:12:53
00:13:47	33.73	60.59	25.4	35.43	75	00:12:54
00:13:48	33.75	60.68	25.4	35.45	75	00:12:55
00:13:49	33.75	60.68	25.4	35.45	76	00:12:56
00:13:50	33.75	60.62	25.41	35.45	77	00:12:57
00:13:51	33.75	60.56	25.41	35.45	78	00:12:58
00:13:52	33.75	60.53	25.42	35.45	78	00:12:59
00:13:53	33.74	60.56	25.44	35.44	79	00:13:00
00:13:54	33.75	60.53	25.44	35.45	79	00:13:01
00:13:55	33.75	60.56	25.45	35.45	79	00:13:02
00:13:56	33.76	60.54	25.45	35.46	79	00:13:03
00:13:57	33.76	60.42	25.46	35.46	80	00:13:04
00:13:59	33.76	60.36	25.47	35.46	84	00:13:05
00:14:00	33.76	60.3	25.48	35.46	87	00:13:06
00:14:01	33.77	60.3	25.47	35.47	88	00:13:07
00:14:02	33.77	60.33	25.48	35.47	88	00:13:08
00:14:03	33.77	60.27	25.49	35.47	88	00:13:09
00:14:04	33.77	60.18	25.5	35.47	88	00:13:10
00:14:05	33.77	60.15	25.51	35.47	88	00:13:11
00:14:06	33.77	60.18	25.52	35.47	88	00:13:12
00:14:07	33.78	60.12	25.51	35.48	87	00:13:13
00:14:08	33.78	60.09	25.54	35.48	86	00:13:14
00:14:09	33.77	59.97	25.54	35.47	84	00:13:15
00:14:10	33.77	59.85	25.54	35.47	85	00:13:16
00:14:11	33.78	59.76	25.56	35.48	85	00:13:17
00:14:12	33.78	59.82	25.56	35.48	84	00:13:18
00:14:13	33.79	59.85	25.56	35.49	84	00:13:19
00:14:15	33.8	59.88	25.56	35.5	81	00:13:20
00:14:16	33.8	59.86	25.57	35.5	79	00:13:21
00:14:17	33.8	59.95	25.58	35.5	78	00:13:22
00:14:18	33.81	59.95	25.59	35.51	78	00:13:23
00:14:19	33.82	59.92	25.59	35.52	79	00:13:24
00:14:20	33.82	59.95	25.6	35.52	79	00:13:25
00:14:21	33.82	60.07	25.6	35.52	80	00:13:26
00:14:22	33.82	60.04	25.61	35.52	81	00:13:27
00:14:23	33.82	60.04	25.62	35.52	82	00:13:28
00:14:24	33.82	60.05	25.62	35.52	82	00:13:29
00:14:25	33.83	60.02	25.63	35.53	82	00:13:30
00:14:26	33.83	59.96	25.64	35.53	81	00:13:31
00:14:27	33.83	59.84	25.66	35.53	79	00:13:32
00:14:28	33.82	59.81	25.66	35.52	75	00:13:33
00:14:30	33.82	59.9	25.67	35.52	74	00:13:34
00:14:31	33.81	59.96	25.67	35.51	72	00:13:35
00:14:32	33.81	60.05	25.68	35.51	70	00:13:36
00:14:33	33.82	60.18	25.68	35.52	68	00:13:37
00:14:34	33.83	60.21	25.69	35.53	66	00:13:38
00:14:35	33.84	60.18	25.71	35.54	63	00:13:39
00:14:36	33.84	60.12	25.71	35.54	62	00:13:40
00:14:37	33.84	60.12	25.72	35.54	62	00:13:41
00:14:38	33.83	60.15	25.71	35.53	64	00:13:42
00:14:39	33.84	60.34	25.74	35.54	65	00:13:43
00:14:40	33.83	60.28	25.74	35.53	65	00:13:44
00:14:41	33.84	60.22	25.74	35.54	66	00:13:45
00:14:42	33.83	60.16	25.76	35.53	65	00:13:46
00:14:43	33.84	60.1	25.76	35.54	64	00:13:47
00:14:44	33.83	60.13	25.76	35.53	63	00:13:48
00:14:46	33.85	60.07	25.76	35.55	61	00:13:49
00:14:47	33.85	60.13	25.78	35.55	61	00:13:50
00:14:48	33.86	60.19	25.79	35.56	59	00:13:51
00:14:49	33.85	60.22	25.79	35.55	58	00:13:52
00:14:50	33.85	60.13	25.8	35.55	59	00:13:53
00:14:51	33.85	59.92	25.8	35.55	58	00:13:54
00:14:52	33.85	59.89	25.81	35.55	60	00:13:55
00:14:53	33.85	59.86	25.82	35.55	60	00:13:56
00:14:54	33.86	59.89	25.82	35.56	60	00:13:57
00:14:55	33.86	59.92	25.83	35.56	59	00:13:58
00:14:56	33.86	59.93	25.84	35.56	60	00:13:59
00:14:57	33.86	59.96	25.84	35.56	61	00:14:00
00:14:58	33.87	59.99	25.85	35.57	60	00:14:01
00:14:59	33.87	59.93	25.86	35.57	60	00:14:02
00:15:01	33.88	59.93	25.86	35.58	59	00:14:03
00:15:02	33.88	59.9	25.86	35.58	57	00:14:04
00:15:03	33.88	59.9	25.87	35.58	56	00:14:05
00:15:04	33.88	59.9	25.87	35.58	56	00:14:06
00:15:05	33.88	59.9	25.88	35.58	55	00:14:07
00:15:06	33.89	59.84	25.89	35.59	54	00:14:08
00:15:07	33.89	59.75	25.9	35.59	54	00:14:09
00:15:08	33.91	59.69	25.9	35.61	55	00:14:10
00:15:09	33.93	59.66	25.9	35.63	57	00:14:11
00:15:10	33.93	59.6	25.92	35.63	58	00:14:12
00:15:11	33.93	59.6	25.92	35.63	59	00:14:13
00:15:12	33.93	59.66	25.93	35.63	59	00:14:14
00:15:13	33.93	59.51	25.92	35.63	59	00:14:15
00:15:14	33.92	59.48	25.93	35.62	58	00:14:16
00:15:15	33.92	59.58	25.94	35.62	57	00:14:17
00:15:17	33.92	59.58	25.96	35.62	57	00:14:18
00:15:18	33.91	59.55	25.97	35.61	56	00:14:19
00:15:19	33.91	59.58	25.96	35.61	56	00:14:20
00:15:20	33.91	59.52	25.97	35.61	56	00:14:21
00:15:21	33.9	59.52	25.97	35.6	56	00:14:22
00:15:22	33.91	59.55	25.98	35.61	58	00:14:23
00:15:23	33.9	59.59	26	35.6	59	00:14:24
00:15:24	33.9	59.59	26	35.6	60	00:14:25
00:15:25	33.9	59.71	26.01	35.6	60	00:14:26
00:15:26	33.91	59.77	26.01	35.61	59	00:14:27
00:15:27	33.91	59.74	26.02	35.61	59	00:14:28
00:15:28	33.92	59.68	26.03	35.62	59	00:14:29
00:15:29	33.92	59.77	26.05	35.62	60	00:14:30
00:15:30	33.93	59.87	26.04	35.63	61	00:14:31
00:15:32	33.93	59.81	26.04	35.63	61	00:14:32
00:15:33	33.94	59.75	26.06	35.64	61	00:14:33
00:15:34	33.95	59.72	26.07	35.65	62	00:14:34
00:15:35	33.95	59.78	26.07	35.65	62	00:14:35
00:15:36	33.95	59.84	26.07	35.65	63	00:14:36
00:15:37	33.95	59.75	26.1	35.65	63	00:14:37
00:15:38	33.95	59.42	26.08	35.65	63	00:14:38
00:15:39	33.95	59.05	26.09	35.65	63	00:14:39
00:15:40	33.96	58.74	26.1	35.66	61	00:14:40
00:15:41	33.96	58.5	26.1	35.66	59	00:14:41
00:15:42	33.96	58.22	26.1	35.66	59	00:14:42
00:15:43	33.97	58.1	26.12	35.67	59	00:14:43
00:15:44	33.97	58.07	26.12	35.67	59	00:14:44
00:15:45	33.97	58.04	26.12	35.67	60	00:14:45
00:15:46	33.97	58.04	26.14	35.67	60	00:14:46
00:15:48	33.97	58.04	26.14	35.67	61	00:14:47
00:15:49	33.96	57.98	26.14	35.66	61	00:14:48
00:15:50	33.96	57.92	26.15	35.66	62	00:14:49
00:15:51	33.95	57.86	26.16	35.65	62	00:14:50
00:15:52	33.96	57.73	26.16	35.66	62	00:14:51
00:15:53	33.96	57.67	26.17	35.66	61	00:14:52
00:15:54	33.96	57.55	26.18	35.66	61	00:14:53
00:15:55	33.97	57.36	26.17	35.67	63	00:14:54
00:15:56	33.96	57.21	26.18	35.66	64	00:14:55
00:15:57	33.96	56.99	26.19	35.66	64	00:14:56
00:15:58	33.96	56.81	26.2	35.66	64	00:14:57
00:15:59	33.96	56.65	26.2	35.66	64	00:14:58
00:16:00	33.96	56.47	26.2	35.66	63	00:14:59
00:16:01	33.96	56.34	26.21	35.66	62	00:15:00
00:16:03	33.96	56.16	26.21	35.66	62	00:15:01
00:16:04	33.96	55.88	26.22	35.66	62	00:15:02
00:16:05	33.96	55.53	26.22	35.66	65	00:15:03
00:16:06	33.96	55.28	26.22	35.66	66	00:15:04
00:16:07	33.96	55.16	26.22	35.66	67	00:15:05
00:16:08	33.95	55.03	26.23	35.65	67	00:15:06
00:16:09	33.95	54.87	26.22	35.65	67	00:15:07
00:16:10	33.94	54.69	26.22	35.64	67	00:15:08
00:16:11	33.94	54.59	26.23	35.64	67	00:15:09
00:16:12	33.93	54.59	26.24	35.63	67	00:15:10
00:16:13	33.93	54.56	26.24	35.63	67	00:15:11
00:16:14	33.92	54.44	26.25	35.62	66	00:15:12
00:16:15	33.92	54.4	26.25	35.62	66	00:15:13
00:16:16	33.92	54.18	26.26	35.62	66	00:15:14
00:16:17	33.92	53.87	26.26	35.62	66	00:15:15
00:16:19	33.91	53.42	26.26	35.61	66	00:15:16
00:16:20	33.9	53.04	26.26	35.6	66	00:15:17
00:16:21	33.88	52.82	26.26	35.58	66	00:15:18
00:16:22	33.87	52.76	26.26	35.57	66	00:15:19
00:16:23	33.86	52.73	26.27	35.56	66	00:15:20
00:16:24	33.86	52.86	26.28	35.56	65	00:15:21
00:16:25	33.86	52.79	26.28	35.56	64	00:15:22
00:16:26	33.86	52.51	26.27	35.56	63	00:15:23
00:16:27	33.86	52.09	26.28	35.56	64	00:15:24
00:16:28	33.85	51.77	26.28	35.55	64	00:15:25
00:16:29	33.84	51.51	26.28	35.54	64	00:15:26
00:16:30	33.84	51.29	26.27	35.54	65	00:15:27
00:16:31	33.84	51.13	26.28	35.54	66	00:15:28
00:16:32	33.84	51	26.29	35.54	66	00:15:29
00:16:34	33.84	50.84	26.29	35.54	66	00:15:30
00:16:35	33.84	50.71	26.28	35.54	66	00:15:31
00:16:36	33.84	50.45	26.27	35.54	68	00:15:32
00:16:37	33.83	50.17	26.28	35.53	69	00:15:33
00:16:38	33.82	50	26.27	35.52	70	00:15:34
00:16:39	33.8	49.84	26.26	35.5	71	00:15:35
00:16:40	33.78	49.65	26.28	35.48	70	00:15:36
00:16:41	33.77	49.45	26.28	35.47	70	00:15:37
00:16:42	33.76	49.29	26.27	35.46	67	00:15:38
00:16:43	33.76	49.13	26.27	35.46	64	00:15:39
00:16:44	33.76	48.77	26.27	35.46	62	00:15:40
00:16:45	33.76	48.41	26.26	35.46	61	00:15:41
00:16:46	33.75	48.12	26.25	35.45	61	00:15:42
00:16:47	33.75	47.89	26.26	35.45	62	00:15:43
00:16:48	33.73	47.76	26.24	35.43	63	00:15:44
00:16:50	33.73	47.63	26.26	35.43	63	00:15:45
00:16:51	33.72	47.43	26.25	35.42	63	00:15:46
00:16:52	33.71	47.3	26.26	35.41	64	00:15:47
00:16:53	33.7	47.2	26.24	35.4	64	00:15:48
00:16:54	33.69	47.04	26.25	35.39	64	00:15:49
00:16:55	33.67	46.9	26.26	35.37	65	00:15:50
00:16:56	33.66	46.67	26.24	35.36	65	00:15:51
00:16:57	33.64	46.64	26.25	35.34	65	00:15:52
00:16:58	33.63	46.54	26.24	35.33	65	00:15:53
00:16:59	33.62	46.48	26.24	35.32	65	00:15:54
00:17:00	33.61	46.58	26.25	35.31	64	00:15:55
00:17:01	33.59	46.45	26.24	35.29	65	00:15:56
00:17:02	33.58	46.25	26.25	35.28	65	00:15:57
00:17:03	33.57	46.02	26.24	35.27	66	00:15:58
00:17:05	33.55	45.98	26.24	35.25	67	00:15:59
00:17:06	33.54	45.75	26.24	35.24	69	00:16:00
00:17:07	33.53	45.68	26.24	35.23	70	00:16:01
00:17:08	33.53	45.62	26.22	35.23	70	00:16:02
00:17:09	33.51	45.48	26.22	35.21	71	00:16:03
00:17:10	33.48	45.45	26.21	35.18	72	00:16:04
00:17:11	33.47	45.32	26.22	35.17	73	00:16:05
00:17:12	33.46	45.25	26.21	35.16	74	00:16:06
00:17:13	33.45	45.25	26.2	35.15	74	00:16:07
00:17:14	33.44	45.35	26.2	35.14	74	00:16:08
00:17:15	33.44	45.35	26.19	35.14	74	00:16:09
00:17:16	33.42	45.28	26.17	35.12	74	00:16:10
00:17:17	33.41	45.18	26.18	35.11	74	00:16:11
00:17:18	33.4	45.18	26.18	35.1	74	00:16:12
00:17:19	33.38	45.18	26.16	35.08	74	00:16:13
00:17:21	33.37	45.04	26.15	35.07	74	00:16:14
00:17:22	33.35	44.91	26.14	35.05	74	00:16:15
00:17:23	33.33	44.84	26.13	35.03	74	00:16:16
00:17:24	33.31	44.75	26.14	35.01	74	00:16:17
00:17:25	33.3	44.64	26.13	35	74	00:16:18
00:17:26	33.28	44.58	26.11	34.98	74	00:16:19
00:17:27	33.27	44.54	26.11	34.97	74	00:16:20
00:17:28	33.25	44.28	26.11	34.95	74	00:16:21
00:17:29	33.23	44.08	26.1	34.93	74	00:16:22
00:17:30	33.22	43.98	26.1	34.92	74	00:16:23
00:17:31	33.2	43.84	26.09	34.9	74	00:16:24
00:17:32	33.18	43.71	26.09	34.88	74	00:16:25
00:17:33	33.16	43.74	26.08	34.86	75	00:16:26
00:17:34	33.15	43.97	26.07	34.85	75	00:16:27
00:17:35	33.14	44.24	26.08	34.84	75	00:16:28
00:17:37	33.12	44.5	26.07	34.82	75	00:16:29
00:17:38	33.1	44.77	26.07	34.8	76	00:16:30
00:17:39	33.09	45.04	26.07	34.79	78	00:16:31
00:17:40	33.08	45.23	26.06	34.78	79	00:16:32
00:17:41	33.05	45.43	26.05	34.75	80	00:16:33
00:17:42	33.03	45.63	26.05	34.73	81	00:16:34
00:17:43	33.01	45.76	26.04	34.71	81	00:16:35
00:17:44	32.99	45.83	26.04	34.69	82	00:16:36
00:17:45	32.97	45.96	26.04	34.67	83	00:16:37
00:17:46	32.96	45.96	26.03	34.66	83	00:16:38
00:17:47	32.94	45.96	26.03	34.64	83	00:16:39
00:17:48	32.93	46.02	26.03	34.63	84	00:16:40
00:17:49	32.92	46.12	26.02	34.62	84	00:16:41
00:17:50	32.91	46.22	26.02	34.61	84	00:16:42
00:17:52	32.91	46.28	26.02	34.61	84	00:16:43
00:17:53	32.91	46.42	26.01	34.61	84	00:16:44
00:17:54	32.88	46.61	26	34.58	84	00:16:45
00:17:55	32.87	46.84	26.01	34.57	84	00:16:46
00:17:56	32.85	47.01	26.01	34.55	84	00:16:47
00:17:57	32.83	47.17	26	34.53	84	00:16:48
00:17:58	32.84	47.4	26	34.54	86	00:16:49
00:17:59	32.83	47.53	26.01	34.53	88	00:16:50
00:18:00	32.82	47.73	26	34.52	90	00:16:51
00:18:01	32.81	47.92	26.02	34.51	91	00:16:52
00:18:02	32.81	47.99	26.01	34.51	93	00:16:53
00:18:03	32.8	48.02	26.02	34.5	94	00:16:54
00:18:04	32.78	48.05	26.01	34.48	95	00:16:55
00:18:05	32.78	48.25	26.02	34.48	96	00:16:56
00:18:07	32.77	48.41	26.02	34.47	98	00:16:57
00:18:08	32.76	48.51	26.01	34.46	99	00:16:58
00:18:09	32.76	48.61	26.02	34.46	101	00:16:59
00:18:10	32.77	48.74	26.01	34.47	102	00:17:00
00:18:11	32.76	48.9	26	34.46	104	00:17:01
00:18:12	32.76	49.1	26	34.46	104	00:17:02
00:18:13	32.75	49.32	26.02	34.45	105	00:17:03
00:18:14	32.75	49.61	26.02	34.45	106	00:17:04
00:18:15	32.75	49.87	26.02	34.45	107	00:17:05
00:18:16	32.76	50	26.02	34.46	107	00:17:06
00:18:17	32.76	50.13	26.02	34.46	107	00:17:07
00:18:18	32.76	50.26	26.02	34.46	107	00:17:08
00:18:19	32.76	50.39	26.02	34.46	108	00:17:09
00:18:20	32.75	50.52	26.02	34.45	108	00:17:10
00:18:21	32.75	50.62	26.02	34.45	108	00:17:11
00:18:23	32.74	50.65	26.02	34.44	108	00:17:12
00:18:24	32.74	50.65	26.04	34.44	108	00:17:13
00:18:25	32.73	50.78	26.03	34.43	110	00:17:14
00:18:26	32.73	50.94	26.04	34.43	111	00:17:15
00:18:27	32.72	51.1	26.04	34.42	112	00:17:16
00:18:28	32.71	51.23	26.04	34.41	112	00:17:17
00:18:29	32.71	51.35	26.04	34.41	112	00:17:18
00:18:30	32.71	51.45	26.04	34.41	112	00:17:19
00:18:31	32.71	51.61	26.03	34.41	112	00:17:20
00:18:32	32.72	51.74	26.04	34.42	112	00:17:21
00:18:33	32.72	51.8	26.04	34.42	113	00:17:22
00:18:34	32.73	51.87	26.04	34.43	114	00:17:23
00:18:35	32.73	52	26.05	34.43	115	00:17:24
00:18:36	32.73	52.12	26.04	34.43	115	00:17:25
00:18:38	32.73	52.25	26.04	34.43	117	00:17:26
00:18:39	32.73	52.48	26.05	34.43	117	00:17:27
00:18:40	32.71	52.67	26.05	34.41	118	00:17:28
00:18:41	32.71	52.7	26.05	34.41	119	00:17:29
00:18:42	32.71	52.73	26.06	34.41	118	00:17:30
00:18:43	32.71	52.76	26.06	34.41	118	00:17:31
00:18:44	32.72	52.89	26.06	34.42	119	00:17:32
00:18:45	32.71	52.89	26.05	34.41	120	00:17:33
00:18:46	32.72	52.89	26.06	34.42	120	00:17:34
00:18:47	32.72	52.86	26.07	34.42	120	00:17:35
00:18:48	32.74	52.86	26.07	34.44	120	00:17:36
00:18:49	32.75	52.83	26.07	34.45	111	00:17:37
00:18:50	32.76	52.76	26.07	34.46	99	00:17:38
00:18:51	32.76	52.73	26.07	34.46	91	00:17:39
00:18:52	32.76	52.7	26.07	34.46	80	00:17:40
00:18:54	32.76	52.7	26.08	34.46	76	00:17:41
00:18:55	32.75	52.73	26.07	34.45	75	00:17:42
00:18:56	32.76	52.7	26.08	34.46	74	00:17:43
00:18:57	32.76	52.67	26.07	34.46	73	00:17:44
00:18:58	32.76	52.7	26.08	34.46	73	00:17:45
00:18:59	32.79	52.73	26.09	34.49	73	00:17:46
00:19:00	32.79	52.83	26.09	34.49	74	00:17:47
00:19:01	32.81	52.9	26.09	34.51	74	00:17:48
00:19:02	32.81	52.96	26.1	34.51	74	00:17:49
00:19:03	32.81	52.99	26.1	34.51	74	00:17:50
00:19:04	32.81	52.99	26.1	34.51	74	00:17:51
00:19:05	32.82	52.96	26.1	34.52	74	00:17:52
00:19:06	32.82	52.96	26.11	34.52	75	00:17:53
00:19:07	32.83	52.89	26.1	34.53	75	00:17:54
00:19:08	32.83	52.89	26.1	34.53	76	00:17:55
00:19:10	32.84	52.83	26.1	34.54	76	00:17:56
00:19:11	32.84	52.77	26.1	34.54	76	00:17:57
00:19:12	32.84	52.74	26.11	34.54	76	00:17:58
00:19:13	32.84	52.67	26.11	34.54	75	00:17:59
00:19:14	32.85	52.61	26.1	34.55	77	00:18:00
00:19:15	32.85	52.61	26.11	34.55	76	00:18:01
00:19:16	32.85	52.58	26.11	34.55	76	00:18:02
00:19:17	32.85	52.55	26.11	34.55	76	00:18:03
00:19:18	32.85	52.52	26.12	34.55	77	00:18:04
00:19:19	32.85	52.52	26.12	34.55	77	00:18:05
00:19:20	32.86	52.58	26.13	34.56	76	00:18:06
00:19:21	32.87	52.61	26.13	34.57	75	00:18:07
00:19:22	32.88	52.64	26.13	34.58	75	00:18:08
00:19:23	32.89	52.65	26.13	34.59	75	00:18:09
00:19:25	32.9	52.71	26.15	34.6	74	00:18:10
00:19:26	32.91	52.74	26.14	34.61	74	00:18:11
00:19:27	32.91	52.74	26.14	34.61	72	00:18:12
00:19:28	32.91	52.77	26.15	34.61	70	00:18:13
00:19:29	32.91	52.81	26.14	34.61	68	00:18:14
00:19:30	32.91	52.84	26.15	34.61	66	00:18:15
00:19:31	32.91	52.84	26.15	34.61	63	00:18:16
00:19:32	32.91	52.84	26.14	34.61	62	00:18:17
00:19:33	32.92	52.87	26.15	34.62	60	00:18:18
00:19:34	32.92	52.87	26.16	34.62	60	00:18:19
00:19:35	32.92	52.9	26.16	34.62	61	00:18:20
00:19:36	32.92	52.9	26.16	34.62	62	00:18:21
00:19:37	32.93	52.94	26.17	34.63	63	00:18:22
00:19:38	32.93	52.93	26.17	34.63	66	00:18:23
00:19:39	32.94	53	26.16	34.64	69	00:18:24
00:19:41	32.95	53.03	26.17	34.65	70	00:18:25
00:19:42	32.96	53.09	26.16	34.66	71	00:18:26
00:19:43	32.98	53.06	26.17	34.68	71	00:18:27
00:19:44	32.99	53.07	26.17	34.69	72	00:18:28
00:19:45	33	53.1	26.19	34.7	71	00:18:29
00:19:46	33	53.13	26.18	34.7	73	00:18:30
00:19:47	32.99	53.16	26.18	34.69	73	00:18:31
00:19:48	33	53.19	26.17	34.7	74	00:18:32
00:19:49	33	53.16	26.18	34.7	74	00:18:33
00:19:50	33.01	53.03	26.19	34.71	75	00:18:34
00:19:51	33.02	52.97	26.18	34.72	75	00:18:35
00:19:52	33.03	52.91	26.19	34.73	76	00:18:36
00:19:53	33.03	52.91	26.18	34.73	76	00:18:37
00:19:54	33.03	52.84	26.19	34.73	77	00:18:38
00:19:56	33.03	52.78	26.2	34.73	78	00:18:39
00:19:57	33.03	52.72	26.2	34.73	78	00:18:40
00:19:58	33.03	52.66	26.2	34.73	79	00:18:41
00:19:59	33.04	52.59	26.2	34.74	79	00:18:42
00:20:00	33.04	52.49	26.21	34.74	81	00:18:43
00:20:01	33.06	52.43	26.2	34.76	82	00:18:44
00:20:02	33.06	52.34	26.2	34.76	83	00:18:45
00:20:03	33.05	52.27	26.21	34.75	84	00:18:46
00:20:04	33.06	52.21	26.21	34.76	84	00:18:47
00:20:05	33.05	52.14	26.2	34.75	84	00:18:48
00:20:06	33.04	52.08	26.22	34.74	84	00:18:49
00:20:07	33.05	52.08	26.22	34.75	84	00:18:50
00:20:08	33.06	52.12	26.22	34.76	84	00:18:51
00:20:09	33.06	52.08	26.23	34.76	84	00:18:52
00:20:11	33.07	52.02	26.22	34.77	85	00:18:53
00:20:12	33.07	51.96	26.23	34.77	87	00:18:54
00:20:13	33.07	51.89	26.23	34.77	90	00:18:55
00:20:14	33.07	51.8	26.24	34.77	92	00:18:56
00:20:15	33.07	51.7	26.23	34.77	95	00:18:57
00:20:16	33.07	51.57	26.23	34.77	99	00:18:58
00:20:17	33.07	51.41	26.23	34.77	102	00:18:59
00:20:18	33.07	51.28	26.24	34.77	105	00:19:00
00:20:19	33.07	51.12	26.24	34.77	107	00:19:01
00:20:20	33.06	50.93	26.23	34.76	109	00:19:02
00:20:21	33.06	50.74	26.22	34.76	112	00:19:03
00:20:22	33.05	50.58	26.23	34.75	115	00:19:04
00:20:23	33.05	50.25	26.23	34.75	116	00:19:05
00:20:24	33.04	49.93	26.23	34.74	117	00:19:06
00:20:25	33.04	49.54	26.22	34.74	119	00:19:07
00:20:27	33.03	49.09	26.22	34.73	121	00:19:08
00:20:28	33.03	48.7	26.22	34.73	122	00:19:09
00:20:29	33.03	48.34	26.21	34.73	122	00:19:10
00:20:30	33.03	48.08	26.21	34.73	123	00:19:11
00:20:31	33.03	47.75	26.21	34.73	124	00:19:12
00:20:32	33.02	47.42	26.19	34.72	124	00:19:13
00:20:33	33.01	47.13	26.2	34.71	123	00:19:14
00:20:34	33	46.9	26.18	34.7	124	00:19:15
00:20:35	33	46.67	26.18	34.7	125	00:19:16
00:20:36	32.98	46.34	26.17	34.68	126	00:19:17
00:20:37	32.98	46.07	26.16	34.68	129	00:19:18
00:20:38	32.97	45.91	26.16	34.67	130	00:19:19
00:20:39	32.96	45.77	26.15	34.66	131	00:19:20
00:20:40	32.95	45.74	26.16	34.65	131	00:19:21
00:20:41	32.95	45.71	26.15	34.65	131	00:19:22
00:20:43	32.93	45.71	26.15	34.63	131	00:19:23
00:20:44	32.92	45.71	26.14	34.62	132	00:19:24
00:20:45	32.92	45.74	26.15	34.62	132	00:19:25
00:20:46	32.91	45.8	26.14	34.61	132	00:19:26
00:20:47	32.89	45.87	26.13	34.59	132	00:19:27
00:20:48	32.88	45.9	26.14	34.58	131	00:19:28
00:20:49	32.87	45.94	26.13	34.57	132	00:19:29
00:20:50	32.86	45.97	26.14	34.56	133	00:19:30
00:20:51	32.84	46	26.14	34.54	133	00:19:31
00:20:52	32.84	46.03	26.13	34.54	133	00:19:32
00:20:53	32.83	46.07	26.12	34.53	133	00:19:33
00:20:54	32.82	45.97	26.12	34.52	133	00:19:34
00:20:55	32.81	45.87	26.12	34.51	132	00:19:35
00:20:57	32.8	45.7	26.11	34.5	131	00:19:36
00:20:58	32.8	45.44	26.12	34.5	131	00:19:37
00:20:59	32.79	45.17	26.1	34.49	130	00:19:38
00:21:00	32.78	45.01	26.1	34.48	128	00:19:39
00:21:01	32.77	44.87	26.09	34.47	126	00:19:40
00:21:02	32.75	44.8	26.09	34.45	115	00:19:41
00:21:03	32.73	44.7	26.08	34.43	115	00:19:42
00:21:04	32.71	44.5	26.06	34.41	117	00:19:43
00:21:05	32.69	44.34	26.05	34.39	118	00:19:44
00:21:06	32.68	44.17	26.04	34.38	119	00:19:45
00:21:07	32.68	44	26.04	34.38	121	00:19:46
00:21:08	32.68	43.77	26.02	34.38	121	00:19:47
00:21:09	32.67	43.63	26.02	34.37	121	00:19:48
00:21:10	32.66	43.6	26.01	34.36	121	00:19:49
00:21:12	32.64	43.57	26	34.34	121	00:19:50
00:21:13	32.62	43.56	26.01	34.32	121	00:19:51
00:21:14	32.61	43.5	26	34.31	121	00:19:52
00:21:15	32.6	43.56	25.99	34.3	122	00:19:53
00:21:16	32.58	43.66	25.99	34.28	122	00:19:54
00:21:17	32.55	43.69	25.97	34.25	123	00:19:55
00:21:18	32.54	43.73	25.96	34.24	125	00:19:56
00:21:19	32.52	43.69	25.96	34.22	127	00:19:57
00:21:20	32.5	43.69	25.97	34.2	127	00:19:58
00:21:21	32.49	43.56	25.97	34.19	127	00:19:59
00:21:22	32.47	43.49	25.96	34.17	128	00:20:00
00:21:23	32.46	43.59	25.95	34.16	128	00:20:01
00:21:24	32.45	43.66	25.96	34.15	128	00:20:02
00:21:25	32.44	43.69	25.95	34.14	129	00:20:03
00:21:27	32.42	43.73	25.96	34.12	130	00:20:04
00:21:28	32.4	43.69	25.95	34.1	130	00:20:05
00:21:29	32.39	43.69	25.93	34.09	130	00:20:06
00:21:30	32.38	43.66	25.93	34.08	130	00:20:07
00:21:31	32.36	43.66	25.93	34.06	129	00:20:08
00:21:32	32.36	43.72	25.93	34.06	128	00:20:09
00:21:33	32.35	43.86	25.93	34.05	128	00:20:10
00:21:34	32.34	43.96	25.93	34.04	128	00:20:11
00:21:35	32.33	44.03	25.93	34.03	128	00:20:12
00:21:36	32.32	44.16	25.93	34.02	129	00:20:13
00:21:37	32.31	44.22	25.94	34.01	129	00:20:14
00:21:38	32.3	44.36	25.94	34	130	00:20:15
00:21:39	32.29	44.49	25.93	33.99	130	00:20:16
00:21:41	32.28	44.62	25.93	33.98	131	00:20:17
00:21:42	32.26	44.76	25.93	33.96	132	00:20:18
00:21:43	32.25	44.89	25.94	33.95	135	00:20:19
00:21:44	32.23	44.95	25.92	33.93	136	00:20:20
00:21:45	32.22	44.99	25.93	33.92	136	00:20:21
00:21:46	32.22	44.95	25.91	33.92	137	00:20:22
00:21:47	32.21	45.02	25.92	33.91	137	00:20:23
00:21:48	32.21	45.09	25.92	33.91	137	00:20:24
00:21:49	32.2	45.15	25.92	33.9	137	00:20:25
00:21:50	32.19	45.22	25.91	33.89	132	00:20:26
00:21:51	32.18	45.25	25.91	33.88	124	00:20:27
00:21:52	32.18	45.28	25.91	33.88	121	00:20:28
00:21:53	32.18	45.38	25.9	33.88	120	00:20:29
00:21:54	32.18	45.45	25.92	33.88	119	00:20:30
00:21:56	32.18	45.48	25.91	33.88	118	00:20:31
00:21:57	32.19	45.48	25.9	33.89	118	00:20:32
00:21:58	32.19	45.55	25.9	33.89	118	00:20:33
00:21:59	32.19	45.61	25.9	33.89	119	00:20:34
00:22:00	32.19	45.61	25.89	33.89	119	00:20:35
00:22:01	32.19	45.64	25.9	33.89	119	00:20:36
00:22:02	32.18	45.68	25.88	33.88	119	00:20:37
00:22:03	32.17	45.74	25.9	33.87	118	00:20:38
00:22:04	32.16	45.81	25.89	33.86	118	00:20:39
00:22:05	32.15	45.87	25.89	33.85	118	00:20:40
00:22:06	32.15	45.91	25.89	33.85	118	00:20:41
00:22:07	32.15	45.94	25.88	33.85	118	00:20:42
00:22:08	32.16	45.94	25.9	33.86	117	00:20:43
00:22:10	32.16	45.97	25.88	33.86	116	00:20:44
00:22:11	32.16	46.04	25.89	33.86	116	00:20:45
00:22:12	32.15	46.07	25.88	33.85	116	00:20:46
00:22:13	32.14	46.04	25.87	33.84	116	00:20:47
00:22:14	32.14	46.07	25.86	33.84	116	00:20:48
00:22:15	32.14	46.07	25.87	33.84	115	00:20:49
00:22:16	32.14	46.07	25.87	33.84	113	00:20:50
00:22:17	32.14	46.04	25.86	33.84	113	00:20:51
00:22:18	32.14	46	25.85	33.84	113	00:20:52
00:22:19	32.14	45.94	25.87	33.84	113	00:20:53
00:22:20	32.14	45.9	25.87	33.84	112	00:20:54
00:22:21	32.14	45.9	25.86	33.84	112	00:20:55
00:22:22	32.15	45.87	25.87	33.85	112	00:20:56
00:22:23	32.15	45.94	25.85	33.85	112	00:20:57
00:22:25	32.15	46	25.85	33.85	112	00:20:58
00:22:26	32.15	45.94	25.84	33.85	111	00:20:59
00:22:27	32.15	45.94	25.85	33.85	111	00:21:00
00:22:28	32.14	45.9	25.84	33.84	110	00:21:01
00:22:29	32.11	45.87	25.85	33.81	104	00:21:02
00:22:30	32.09	45.87	25.84	33.79	90	00:21:03
00:22:31	32.07	45.87	25.83	33.77	78	00:21:04
00:22:32	32.07	45.87	25.84	33.77	75	00:21:05
00:22:33	32.07	45.9	25.84	33.77	74	00:21:06
00:22:34	32.06	45.87	25.84	33.76	73	00:21:07
00:22:35	32.06	45.8	25.84	33.76	72	00:21:08
00:22:36	32.07	45.8	25.83	33.77	72	00:21:09
00:22:37	32.08	45.83	25.82	33.78	72	00:21:10
00:22:39	32.08	45.87	25.82	33.78	71	00:21:11
00:22:40	32.08	45.97	25.83	33.78	71	00:21:12
00:22:41	32.1	46.03	25.84	33.8	72	00:21:13
00:22:42	32.09	46.1	25.82	33.79	73	00:21:14
00:22:43	32.09	46.2	25.83	33.79	74	00:21:15
00:22:44	32.11	46.23	25.83	33.81	75	00:21:16
00:22:45	32.1	46.26	25.82	33.8	76	00:21:17
00:22:46	32.11	46.33	25.82	33.81	77	00:21:18
00:22:47	32.11	46.43	25.82	33.81	79	00:21:19
00:22:48	32.12	46.49	25.84	33.82	79	00:21:20
00:22:49	32.11	46.56	25.83	33.81	80	00:21:21
00:22:50	32.12	46.62	25.82	33.82	82	00:21:22
00:22:51	32.12	46.66	25.83	33.82	83	00:21:23
00:22:52	32.12	46.69	25.84	33.82	84	00:21:24
00:22:54	32.11	46.72	25.83	33.81	84	00:21:25
00:22:55	32.12	46.69	25.82	33.82	84	00:21:26
00:22:56	32.12	46.72	25.82	33.82	84	00:21:27
00:22:57	32.13	46.72	25.82	33.83	83	00:21:28
00:22:58	32.14	46.69	25.82	33.84	83	00:21:29
00:22:59	32.15	46.69	25.82	33.85	83	00:21:30
00:23:00	32.15	46.82	25.81	33.85	83	00:21:31
00:23:01	32.15	46.92	25.81	33.85	83	00:21:32
00:23:02	32.16	47.02	25.81	33.86	84	00:21:33
00:23:03	32.16	47.05	25.82	33.86	85	00:21:34
00:23:04	32.16	47.11	25.82	33.86	87	00:21:35
00:23:05	32.17	47.15	25.81	33.87	88	00:21:36
00:23:06	32.18	47.15	25.82	33.88	88	00:21:37
00:23:07	32.18	47.18	25.81	33.88	89	00:21:38
00:23:09	32.19	47.25	25.81	33.89	89	00:21:39
00:23:10	32.19	47.31	25.82	33.89	89	00:21:40
00:23:11	32.19	47.31	25.81	33.89	90	00:21:41
00:23:12	32.19	47.25	25.81	33.89	91	00:21:42
00:23:13	32.19	47.24	25.81	33.89	93	00:21:43
00:23:14	32.2	47.21	25.8	33.9	94	00:21:44
00:23:15	32.2	47.21	25.8	33.9	96	00:21:45
00:23:16	32.21	47.15	25.79	33.91	98	00:21:46
00:23:17	32.22	47.11	25.8	33.92	100	00:21:47
00:23:18	32.22	47.11	25.79	33.92	102	00:21:48
00:23:19	32.22	47.14	25.8	33.92	103	00:21:49
00:23:20	32.23	47.11	25.8	33.93	106	00:21:50
00:23:21	32.23	47.15	25.8	33.93	108	00:21:51
00:23:23	32.22	47.11	25.8	33.92	109	00:21:52
00:23:24	32.22	47.11	25.79	33.92	110	00:21:53
00:23:25	32.22	47.08	25.79	33.92	111	00:21:54
00:23:26	32.24	47.05	25.79	33.94	111	00:21:55
00:23:27	32.24	47.05	25.79	33.94	113	00:21:56
00:23:28	32.25	47.01	25.8	33.95	115	00:21:57
00:23:29	32.26	47.05	25.81	33.96	116	00:21:58
00:23:30	32.25	46.98	25.8	33.95	118	00:21:59
00:23:31	32.26	46.98	25.79	33.96	120	00:22:00
00:23:32	32.27	46.92	25.8	33.97	120	00:22:01
00:23:33	32.28	46.92	25.8	33.98	121	00:22:02
00:23:34	32.28	46.82	25.78	33.98	121	00:22:03
00:23:35	32.29	46.75	25.78	33.99	122	00:22:04
00:23:36	32.3	46.72	25.78	34	121	00:22:05
00:23:38	32.31	46.68	25.8	34.01	122	00:22:06
00:23:39	32.31	46.65	25.79	34.01	124	00:22:07
00:23:40	32.33	46.59	25.8	34.03	128	00:22:08
00:23:41	32.33	46.59	25.8	34.03	130	00:22:09
00:23:42	32.34	46.59	25.8	34.04	132	00:22:10
00:23:43	32.35	46.59	25.8	34.05	133	00:22:11
00:23:44	32.35	46.62	25.79	34.05	135	00:22:12
00:23:45	32.36	46.65	25.78	34.06	137	00:22:13
00:23:46	32.36	46.59	25.78	34.06	139	00:22:14
00:23:47	32.36	46.65	25.79	34.06	141	00:22:15
00:23:48	32.37	46.72	25.78	34.07	141	00:22:16
00:23:49	32.36	46.78	25.78	34.06	143	00:22:17
00:23:50	32.36	46.91	25.79	34.06	145	00:22:18
00:23:51	32.36	46.95	25.79	34.06	146	00:22:19
00:23:53	32.36	46.98	25.78	34.06	148	00:22:20
00:23:54	32.37	47.04	25.78	34.07	150	00:22:21
00:23:55	32.39	47.11	25.77	34.09	151	00:22:22
[truncated: 4,057 more rows]

## Sheet: 6
Time (h:m:s)	Tc (C)	RH (%)	Ta (C)	Tc (C)	HR (bpm)	Time HR	Correction factor	0.5
[truncated: 4,620 more rows]

[truncated: 43 more sheets: 7, 8, 9, 10, 11, 12, 13, 14, 15, 16, 17, 18, 19, 20, 21, 22, 23, 24, 25, 26 …]
