# Supplementary material for: Evaluation of a Wearable Non-Invasive Thermometer for Monitoring Ear Canal Temperature during Physically Demanding (Outdoor) Work
Source: Int J Environ Res Public Health. 2021 May 4;18(9):4896. doi: 10.3390/ijerph18094896 (PMC8125248; doi:10.3390/ijerph18094896)
Supplement: Supplementary file 1 [file ijerph-18-04896-s001.zip › Supporting Information files/Lab study/Lab study - in vivo validation - Bland-Altman plots.xlsx]

## Sheet: Lab Cosinuss non-calibrated
Mean temperature	Difference Cosinuss versus tympanic IR	Mean difference	LoA +	LoA -	zero-line	LoA
36.2	-0.9	-1.14	-0.09	-2.19	0	1.05
36.4	-1.1	-1.14	-0.09	-2.19	0
36.35	-1.6	-1.14	-0.09	-2.19	0
36.45	-0.6	-1.14	-0.09	-2.19	0
35.35	-1.6	-1.14	-0.09	-2.19	0
35.55	-2	-1.14	-0.09	-2.19	0
35.85	-0.8	-1.14	-0.09	-2.19	0
36.1	-0.7	-1.14	-0.09	-2.19	0
35.5	-2.1	-1.14	-0.09	-2.19	0
36.3	-0.5	-1.14	-0.09	-2.19	0
36	-1.1	-1.14	-0.09	-2.19	0
35.6	-1.5	-1.14	-0.09	-2.19	0
35.55	-0.8	-1.14	-0.09	-2.19	0
36.35	-0.4	-1.14	-0.09	-2.19	0
35.55	-1.4	-1.14	-0.09	-2.19	0
	-1.14

## Sheet: Lab Cosinuss calibrated
Mean temperature	Difference Cosinuss versus tympanic IR	Mean difference	LoA +	LoA -	zero-line	LoA
36.85	0.1	-0.0333333	0.686667	-0.753333	0	0.72
37.1	0	-0.0333333	0.686667	-0.753333	0
37.45	0.3	-0.0333333	0.686667	-0.753333	0
37.1	0.4	-0.0333333	0.686667	-0.753333	0
36	-0.6	-0.0333333	0.686667	-0.753333	0
36.7	0	-0.0333333	0.686667	-0.753333	0
36.35	-0.1	-0.0333333	0.686667	-0.753333	0
36.55	-0.1	-0.0333333	0.686667	-0.753333	0
36.45	-0.5	-0.0333333	0.686667	-0.753333	0
36.75	0.1	-0.0333333	0.686667	-0.753333	0
36.95	0.5	-0.0333333	0.686667	-0.753333	0
36.5	0	-0.0333333	0.686667	-0.753333	0
35.7	-0.8	-0.0333333	0.686667	-0.753333	0
36.55	-0.1	-0.0333333	0.686667	-0.753333	0
36.55	0.3	-0.0333333	0.686667	-0.753333	0
	-0.0333333
