# Supplementary material for: Evaluation of a Wearable Non-Invasive Thermometer for Monitoring Ear Canal Temperature during Physically Demanding (Outdoor) Work
Source: Int J Environ Res Public Health. 2021 May 4;18(9):4896. doi: 10.3390/ijerph18094896 (PMC8125248; doi:10.3390/ijerph18094896)
Supplement: Supplementary file 1 [file ijerph-18-04896-s001.zip › Supporting Information files/Lab study/Lab study - in vivo validation - data subjects RAW.xlsx]

## Sheet: Subject 1
Subject number	1						CF person										CF person
							1.3										-0.8
Step 1: Validation measuremetn in rest - Cosinuss										Step 1b: Validation measurement in rest - CORTES2
measurement no.	Time	Cosinuss	Braun	Gallium	Zephyr	Remarks	Calibrated			measurement no.	Time	CORTES2	Braun	Gallium	Zephyr	Remarks	Calibrated
0	0 min	35.5	36.9	36.4	37.7	Rigth ear	36.8			0	0 min	37.4	36.9	36.5	41.3	Rigth ear	36.6
1	1 min	35.6	36.9	36.5	37.6		36.9	TRUE		1	1 min	37.5	36.7	36.5	40.6	CALIBRATION	36.7	TRUE
2	2 min	35.6	36.7	36.5	37.6		36.9			2	2 min	37.6	36.6	36.5	40		36.8
3	3 min	35.6	36.7	36.5	37.6		36.9			3	3 min	37.6	36.7	36.4	39.4		36.8
4	4 min	35.7	36.7	36.5	37.6		37			4	4 min	37.7	36.7	36.4	38.9		36.9
5	5 min	35.6	36.8	36.5	37.6		36.9			5	5 min	37.7	36.8	36.4	38.4		36.9
6	6 min	35.7	36.8	36.5	37.6		37			6	6 min	37.7	36.6	36.4	38		36.9
7	7 min	35.6	36.8	36.5	37.6		36.9			7	7 min	37.7	36.8	36.4	38		36.9
8	8 min	35.6	36.8	36.5	37.6		36.9			8	8 min	37.7	36.6	36.4	37.9		36.9
9	9 min	35.6	36.7	36.5	37.6		36.9			9	9 min	37.8	36.6	36.4	37.9		37
10	10 min	35.6	36.7	36.5	37.6		36.9			10	10 min	37.8	36.5	36.4	37.9		37
	AVG	35.6091	36.7727	36.4909	37.6091		36.9091				AVG	37.6545	36.6818	36.4273	38.9364		36.8545
	SD	0.053936	0.0786245	0.0301511	0.0301511		0.053936				SD	0.121356	0.116775	0.0467099	1.22333		0.121356
Step 2: Validation during activity
measurement no.	Time	Activity	Cosinuss	CORTES2	Ta	HE	Zephyr
0	0 min	Sitting	34.9	33.5	27.1	0.43	37.3
1	1 min	Sitting	34.9	33.7	27.4	0.432	37.3
2	2 min	Sitting	34.9	34	27.8	0.446	37.3			2nd measurement used for induvidual calibration
3	3 min	Walk	34.9	34	27.9	0.426	37.3			9th measurement used for statistical analysis
4	4 min	Walk	34.9	34.1	28.1	0.429	37.3			Calculation
5	5 min	Jump	34.9	33.9	28.1	0.455	37.3			Check
6	6 min	Jump	34.9	33.6	28.2	0.458	37.3			Missing value

## Sheet: Subject 2
Subject number	2						CF person										CF person
							1.4										-0.6
Step 1: Validation measuremetn in rest - Cosinuss										Step 1b: Validation measurement in rest - CORTES2
measurement no.	Time	Cosinuss	Braun	Gallium	Zephyr	Remarks	Calibrated			measurement no.	Time	CORTES2	Braun	Gallium	Zephyr	Remarks	Calibrated
0	0 min	35.6	37.1	36.8	37.3	Left ear	37			0	0 min	37.5	37.1	36.7	36.8	Left ear	36.9
1	1 min	35.7	37.1	36.8	37.3		37.1	TRUE		1	1 min	37.5	36.9	36.8	36.9		36.9	TRUE
2	2 min	35.7	37	36.8	37.3		37.1			2	2 min	37.6	37.1	36.8	36.9		37
3	3 min	35.7	37.1	36.8	37.4		37.1			3	3 min	37.5	37.1	36.8	36.9		36.9
4	4 min	35.7	37.1	36.8	37.4		37.1			4	4 min	37.5	37.2	36.8	36.9		36.9
5	5 min	35.7	37.1	36.8	37.4		37.1			5	5 min	37.5	37.2	36.8	36.9		36.9
6	6 min	35.8	37	36.8	37.4		37.2			6	6 min	37.5	37.1	36.8	36.9		36.9
7	7 min	35.7	37	36.8	37.4		37.1			7	7 min	37.5	37.1	36.8	36.9		36.9
8	8 min	35.7	37.1	36.9	37.4		37.1			8	8 min	37.5	37	36.8	36.9		36.9
9	9 min	35.8	37.1	36.9	37.4		37.2			9	9 min	37.5	37	36.8	36.9		36.9
10	10 min	35.7	37.1	36.9	37.4		37.1			10	10 min	37.5	37	36.8	36.9		36.9
	AVG	35.7091	37.0727	36.8273	37.3727		37.1091				AVG	37.5091	37.0727	36.7909	36.8909		36.9091
	SD	0.053936	0.0467099	0.0467099	0.0467099		0.053936				SD	0.0301511	0.0904534	0.0301511	0.0301511		0.0301511
Step 2: Validation during activity
measurement no.	Time	Activity	Cosinuss	CORTES2	Ta	HE	Zephyr
0	0 min	Sitting	36.4	34.5	27.9	0.414	37.6
1	1 min	Sitting	36.5	34.8	28.13	0.411	37.6
2	2 min	Sitting	36.6	35.2	28.3	0.442	37.7			2nd measurement used for induvidual calibration
3	3 min	Walk	36.7	35.2	28.5	0.421	37.7			9th measurement used for statistical analysis
4	4 min	Walk	36.7	35.3	28.6	0.432	37.7			Calculation
5	5 min	Jump	35.7	35.3	28.8	0.452	37.7			Check
6	6 min	Jump	36.7	35.3	28.9	0.463	37.8			Missing value

## Sheet: Subject 3
Subject number	3						CF person										CF person
							2.2										0.3
Step 1: Validation measuremetn in rest - Cosinuss										Step 1b: Validation measurement in rest - CORTES2
measurement no.	Time	Cosinuss	Braun	Gallium	Zephyr	Remarks	Calibrated			measurement no.	Time	CORTES2	Braun	Gallium	Zephyr	Remarks	Calibrated
0	0 min	35.1	37.2	36.2	37.3	Left ear	37.3			0	0 min	36.7	37.2	37.1	37.3	Left ear	37
1	1 min	35.1	37.3	36.3	37.3		37.3	TRUE		1	1 min	36.9	37.2	37	37.3		37.2	TRUE
2	2 min	35.1	37.2	36.4	37.3		37.3			2	2 min	36.9	37.2	37	37.3		37.2
3	3 min	35.1	37.1	36.5	37.3		37.3			3	3 min	36.8	37.2	37.1	37.3		37.1
4	4 min	35.2	37.2	36.6	37.3		37.4			4	4 min	36.7	37.1	37.1	37.3		37
5	5 min	35.2	37.2	36.6	37.3		37.4			5	5 min	36.9	37.2	37.1	37.3		37.2
6	6 min	35.3	37.1	36.6	37.3		37.5			6	6 min	36.8	37.1	37.1	37.3		37.1
7	7 min	35.3	37.1	36.7	37.3	Lost connection - reconnected quickly, no disturbance	37.5			7	7 min	36.7	37.1	37.1	37.3		37
8	8 min	35.4	37.3	36.7	37.3		37.6			8	8 min	36.7	37.1	37.1	37.3		37
9	9 min	35.7	37.3	36.8	37.3		37.9			9	9 min	36.9	37.2	37.1	37.3		37.2
10	10 min	35.6	37.1	36.8	37.3		37.8			10	10 min	37	37.2	37	37.3		37.3
	AVG	35.2818	37.1909	36.5636	37.3		37.4818				AVG	36.8182	37.1636	37.0727	37.3		37.1182
	SD	0.208893	0.0831209	0.19633	7.45224e-15		0.208893				SD	0.107872	0.0504525	0.0467099	7.45224e-15		0.107872
Step 2: Validation during activity
measurement no.	Time	Activity	Cosinuss	CORTES2	Ta	HE	Zephyr
0	0 min	Sitting	36.3	35	27.1	0.426	37.4
1	1 min	Sitting	36.4	35.2	27.3	0.429	37.4
2	2 min	Sitting	36.4	35.2	27.4	0.431	37.4			2nd measurement used for induvidual calibration
3	3 min	Walk	36.4	35.2	27.6	0.463	37.4			9th measurement used for statistical analysis
4	4 min	Walk	36.4	35.2	27.8	0.446	37.4			Calculation
5	5 min	Jump	36.3	35.1	28.2	0.475	37.4			Check
6	6 min	Jump	36.3	35.1	28.3	0.52	37.4			Missing value

## Sheet: Subject 4
Subject number	4						CF person										CF person
							1.3										-1.7
Step 1: Validation measuremetn in rest - Cosinuss										Step 1b: Validation measurement in rest - CORTES2
measurement no.	Time	Cosinuss	Braun	Gallium	Zephyr	Remarks	Calibrated			measurement no.	Time	CORTES2	Braun	Gallium	Zephyr	Remarks	Calibrated
0	0 min	35.5	37.1	36.2	37.5	Right ear	36.8			0	0 min	38.6	37	36.2	37.5	Right ear	36.9
1	1 min	35.7	37	36.3	37.5		37	TRUE		1	1 min	38.7	37	36.5	37.5		37
2	2 min	35.8	36.9	36.4	37.5		37.1			2	2 min	38.7	37	36.6	37.5		37
3	3 min	35.8	36.9	36.4	37.5		37.1			3	3 min	38.7	37	36.8	37.5		37
4	4 min	35.9	37	36.4	37.5		37.2			4	4 min	38.7	37.1	36.6	37.5		37
5	5 min	35.9	36.9	36.5	37.5		37.2			5	5 min	38.8	37	36.7	37.5		37.1
6	6 min	35.9	36.9	36.5	37.5		37.2			6	6 min	38.8	37	36.8	37.5		37.1
7	7 min	36	36.9	36.5	37.5		37.3			7	7 min	38.8	37.1	36.8	37.5		37.1
8	8 min	36	36.9	36.6	37.5		37.3			8	8 min	38.8	37.2	36.9	37.6		37.1
9	9 min	36	36.9	36.6	37.5		37.3			9	9 min	38.8	37.1	37	37.6		37.1
10	10 min	36	36.9	36.6	37.5		37.3			10	10 min	39	37.1	37.1	37.6		37.3
	AVG	35.8636	36.9364	36.4545	37.5		37.1636				AVG	38.7636	37.0545	36.7273	37.5273		37.0636
	SD	0.15667	0.06742	0.129334	0		0.15667				SD	0.102691	0.0687552	0.249363	0.0467099		0.102691
Step 2: Validation during activity
measurement no.	Time	Activity	Cosinuss	CORTES2	Ta	HE	Zephyr
0	0 min	Sitting	36.5	39.2	27	0.646	37.6
1	1 min	Sitting	36.6	39.6	27.4	0.655	37.6
2	2 min	Sitting	36.7	39.7	27.5	0.642	37.6			2nd measurement used for induvidual calibration
3	3 min	Walk	36.8	40	27.7	0.654	37.6			9th measurement used for statistical analysis
4	4 min	Walk	36.7	40.1	27.9	0.647	37.6			Calculation
5	5 min	Jump	36.7	40	28.2	0.77	37.6			Check
6	6 min	Jump	36.6	40.1	28.4	0.809	37.6			Missing value

## Sheet: Subject 5
Subject number	5						CF person										CF person
							1.3										0.7
Step 1: Validation measuremetn in rest - Cosinuss										Step 1b: Validation measurement in rest - CORTES2
measurement no.	Time	Cosinuss	Braun	Gallium	Zephyr	Remarks	Calibrated			measurement no.	Time	CORTES2	Braun	Gallium	Zephyr	Remarks	Calibrated
0	0 min	35	36.4	36.4	37.3	Left ear	36.3			0	0 min	35.9	36.7	36.5	37.3	Right ear	36.6
1	1 min	35.1	36.4	36.4	37.3		36.4	TRUE		1	1 min	36	36.7	36.6	37.3		36.7	TRUE
2	2 min	35.1	36.4	36.5	37.3		36.4			2	2 min	36	36.6	36.6	37.3		36.7
3	3 min	35.2	36.3	36.5	37.3		36.5			3	3 min	36.1	36.7	36.7	37.3		36.8
4	4 min	34.9	36.6	36.5	37.3	Is getting loose from ear (feeling or really loose?)	36.2			4	4 min	36.1	36.6	36.7	37.3		36.8
5	5 min	34.7	36.6	36.6	37.3		36			5	5 min	36.1	36.6	36.7	37.3		36.8
6	6 min	34.5	36.5	36.6	37.3		35.8			6	6 min	36	36.6	36.7	37.3		36.7
7	7 min	34.4	36.4	36.6	37.3		35.7			7	7 min	36	36.5	36.7	37.3		36.7
8	8 min	34.4	36.3	36.6	37.3		35.7			8	8 min	36.1	36.6	36.7	37.3		36.8
9	9 min	34.3	36.5	36.6	37.3		35.6			9	9 min	36.3	36.6	36.7	37.3		37
10	10 min	34.3	36.5	36.5	37.3		35.6			10	10 min	36.1	36.7	36.7	37.3		36.8
	AVG	34.7182	36.4455	36.5273	37.3		36.0182				AVG	36.0636	36.6273	36.6636	37.3		36.7636
	SD	0.35162	0.103573	0.0786245	7.45224e-15		0.35162				SD	0.102691	0.064667	0.06742	7.45224e-15		0.102691
Step 2: Validation during activity
measurement no.	Time	Activity	Cosinuss	CORTES2	Ta	HE	Zephyr			Remarks
0	0 min	Sitting	36.7	37.7	28.6	0.416	37.3			Left ear: Cosinuss; Right ear: CORTES2
1	1 min	Sitting	36.8	38.2	28.8	0.442	37.3
2	2 min	Sitting	36.8	38.6	29.1	0.475	37.3			2nd measurement used for induvidual calibration
3	3 min	Walk	36.9	38.7	29.2	0.468	37.3			9th measurement used for statistical analysis
4	4 min	Walk	36.8	38.8	29.2	0.465	37.4			Calculation
5	5 min	Jump	36.7	38.7	29.4	0.56	37.4			Check
6	6 min	Jump	36.4	38.6	29.6	0.593	37.4			Missing value

## Sheet: Subject 6
Subject number	6						CF person										CF person
							2.3										1
Step 1: Validation measuremetn in rest - Cosinuss										Step 1b: Validation measurement in rest - CORTES2
measurement no.	Time	Cosinuss	Braun	Gallium	Zephyr	Remarks	Calibrated			measurement no.	Time	CORTES2	Braun	Gallium	Zephyr	Remarks	Calibrated
0	0 min	34.2	36.7	36.1	36.7	Left ear	36.5			0	0 min	35.4	36.8	37	35.6	Left ear	36.4
1	1 min	34.3	36.6	36.2	36.6		36.6	TRUE		1	1 min	35.7	36.7	37	35.6		36.7	TRUE
2	2 min	34.3	36.6	36.4	36.5		36.6			2	2 min	35.6	36.7	37	35.6		36.6
3	3 min	34.3	36.6	36.4	36.4		36.6			3	3 min	35.7	36.7	37	35.5		36.7
4	4 min	34.4	36.7	36.5	36.3		36.7			4	4 min	35.6	36.7	36.9	35.5		36.6
5	5 min	34.3	36.6	36.5	36.2		36.6			5	5 min	35.6	36.7	36.9	35.5		36.6
6	6 min	34.3	36.6	36.6	36.1		36.6			6	6 min	35.6	36.7	36.9	35.5		36.6
7	7 min	34.3	36.6	36.6	36.1		36.6			7	7 min	35.6	36.7	36.9	35.5		36.6
8	8 min	34.4	36.7	36.7	36		36.7			8	8 min	35.6	36.7	36.9	35.4		36.6
9	9 min	34.4	36.6	36.7	36		36.7			9	9 min	35.6	36.6	36.9	35.4		36.6
10	10 min	34.3	36.6	36.7	35.9		36.6			10	10 min	35.6	36.6	36.9	35.4		36.6
	AVG	34.3182	36.6273	36.4909	36.2545		36.6182				AVG	35.6	36.6909	36.9364	35.5		36.6
	SD	0.0603023	0.0467099	0.20226	0.265946		0.0603023				SD	0.0774597	0.053936	0.0504525	0.0774597		0.0774597
Step 2: Validation during activity
measurement no.	Time	Activity	Cosinuss	CORTES2	Ta	HE	Zephyr
0	0 min	Sitting	35.8	37.5	27.3	0.461	35.8
1	1 min	Sitting	35.9	37.9	27.6	0.471	35.8
2	2 min	Sitting	35.9	38.2	28	0.499	35.9			2nd measurement used for induvidual calibration
3	3 min	Walk	35.8	38.3	28.2	0.522	35.9			9th measurement used for statistical analysis
4	4 min	Walk	35.8	38.4	28.4	0.517	35.9			Calculation
5	5 min	Jump	35.7	38.2	28.6	0.578	36			Check
6	6 min	Jump	35.8	38	28.8	0.601	36.1			Missing value

## Sheet: Subject 7
Subject number	7						CF person										CF person
							1										1.5
Step 1: Validation measuremetn in rest - Cosinuss										Step 1b: Validation measurement in rest - CORTES2
measurement no.	Time	Cosinuss	Braun	Gallium	Zephyr	Remarks	Calibrated			measurement no.	Time	CORTES2	Braun	Gallium	Zephyr	Remarks	Calibrated
0	0 min	35.4	36.4	36.4	37.3	Left ear	36.4			0	0 min	35.3	36.8	36.6	37.4	Left ear	36.8
1	1 min	35.4	36.4	36.4	37.3		36.4	TRUE		1	1 min	35.4	36.9	36.6	37.4		36.9	TRUE
2	2 min	35.4	36.5	36.4	37.4		36.4			2	2 min	35.2	36.8	36.6	37.4		36.7
3	3 min	35.3	36.5	36.5	37.4		36.3			3	3 min	35.2	36.7	36.6	37.4		36.7
4	4 min	35.3	36.4	36.5	37.4		36.3			4	4 min	35.2	36.7	36.6	37.4		36.7
5	5 min	35.3	36.5	36.5	37.4		36.3			5	5 min	35.3	36.6	36.6	37.4		36.8
6	6 min	35.3	36.3	36.5	37.4		36.3			6	6 min	35.1	36.7	36.6	37.4		36.6
7	7 min	35.3	36.5	36.5	37.4		36.3			7	7 min	35.2	36.6	36.6	37.4		36.7
8	8 min	35.3	36.4	36.5	37.4		36.3			8	8 min	35.2	36.6	36.6	37.4		36.7
9	9 min	35.2	36.5	36.5	37.4		36.2			9	9 min	35.2	36.7	36.6	37.4		36.7
10	10 min	35.3	36.4	36.5	37.4		36.3			10	10 min	35.1	36.6	36.6	37.4		36.6
	AVG	35.3182	36.4364	36.4727	37.3818		36.3182				AVG	35.2182	36.7	36.6	37.4		36.7182
	SD	0.0603023	0.06742	0.0467099	0.040452		0.0603023				SD	0.0873863	0.1	7.45224e-15	7.45224e-15		0.0873863
Step 2: Validation during activity
measurement no.	Time	Activity	Cosinuss	CORTES2	Ta	HE	Zephyr
0	0 min	Sitting	36.3	38.2	27.6	0.523	37.4
1	1 min	Sitting	36.3	38.4	28	0.522	37.4
2	2 min	Sitting	36.4	38.6	28.3	0.55	37.4			2nd measurement used for induvidual calibration
3	3 min	Walk	36.4	38.7	28.4	0.572	37.3			9th measurement used for statistical analysis
4	4 min	Walk	36.4	38.7	28.4	0.564	37.4			Calculation
5	5 min	Jump	36.3	38.6	28.7	0.695	37.4			Check
6	6 min	Jump	36.2	39.2	28.8	0.715	37.4			Missing value

## Sheet: Subject 8
Subject number	8						CF person										CF person
							0.9										1
Step 1: Validation measuremetn in rest - Cosinuss										Step 1b: Validation measurement in rest - CORTES2
measurement no.	Time	Cosinuss	Braun	Gallium	Zephyr	Remarks	Calibrated			measurement no.	Time	CORTES2	Braun	Gallium	Zephyr	Remarks	Calibrated
0	0 min	35.6	36.6	36.4	36.5	Left ear	36.5			0	0 min	35.5	36.5	36.6	36.8	Left ear	36.5
1	1 min	35.6	36.5	36.4	36.4		36.5	TRUE		1	1 min	35.6	36.6	36.6	36.8		36.6	TRUE
2	2 min	35.6	36.6	36.4	36.5		36.5			2	2 min	35.6	36.6	36.6	36.8		36.6
3	3 min	35.6	36.5	36.5	36.5		36.5			3	3 min	35.6	36.6	36.6	36.8		36.6
4	4 min	35.7	36.5	36.5	36.5		36.6			4	4 min	35.6	36.6	36.6	36.7		36.6
5	5 min	35.6	36.5	36.5	36.6		36.5			5	5 min	35.7	36.5	36.6	36.8		36.7
6	6 min	35.6	36.5	36.5	36.6		36.5			6	6 min	35.6	36.6	36.6	36.8		36.6
7	7 min	35.6	36.6	36.5	36.6		36.5			7	7 min	35.5	36.5	36.6	36.8		36.5
8	8 min	35.6	36.6	36.5	36.6		36.5			8	8 min	35.6	36.6	36.6	36.8		36.6
9	9 min	35.6	36.5	36.6	36.6		36.5			9	9 min	35.5	36.6	36.6	36.8		36.5
10	10 min	35.5	36.5	36.6	36.6		36.4			10	10 min	35.4	36.6	36.6	36.8		36.4
	AVG	35.6	36.5364	36.4909	36.5455		36.5				AVG	35.5636	36.5727	36.6	36.7909		36.5636
	SD	0.0447214	0.0504525	0.0700649	0.0687552		0.0447214				SD	0.080904	0.0467099	7.45224e-15	0.0301511		0.080904
Step 2: Validation during activity
measurement no.	Time	Activity	Cosinuss	CORTES2	Ta	HE	Zephyr
0	0 min	Sitting	36	37.5	26.5	0.479	36.5
1	1 min	Sitting	36.1	37.6	26.7	0.483	36.5
2	2 min	Sitting	36.2	38	27	0.499	36.4			2nd measurement used for induvidual calibration
3	3 min	Walk	36.1	38.1	27.1	0.511	36.3			9th measurement used for statistical analysis
4	4 min	Walk	36.1	38.4	27.3	0.514	36.3			Calculation
5	5 min	Jump	36.1	38.4	27.6	0.551	36.3			Check
6	6 min	Jump	36	38.5	27.8	0.599	36.4			Missing value

## Sheet: Subject 9
Subject number	9						CF person										CF person
							1.9										-1.4
Step 1: Validation measuremetn in rest - Cosinuss										Step 1b: Validation measurement in rest - CORTES2
measurement no.	Time	Cosinuss	Braun	Gallium	Zephyr	Remarks	Calibrated			measurement no.	Time	CORTES2	Braun	Gallium	Zephyr	Remarks	Calibrated
0	0 min	34.5	36.4	36.5	37.4	Left ear	36.4			0	0 min	38.1	37	37	37.3	Left ear	36.7
1	1 min	34.6	36.5	36.6	37.4		36.5	TRUE		1	1 min	38.2	36.8	37	37.3	Continuously coming out of the ear	36.8	TRUE
2	2 min	34.6	36.5	36.6	37.4		36.5			2	2 min	38	36.7	37	37.3		36.6
3	3 min	34.5	36.6	36.7	37.4		36.4			3	3 min	37.9	36.9	37	37.3		36.5
4	4 min	34.5	36.5	36.8	37.4		36.4			4	4 min	38	36.8	37	37.3		36.6
5	5 min	34.5	36.7	36.8	37.4		36.4			5	5 min	38	36.7	37	37.3		36.6
6	6 min	34.5	36.6	36.8	37.4		36.4			6	6 min	38	36.8	37	37.3		36.6
7	7 min	34.3	36.7	36.9	37.4		36.2			7	7 min	37.9	36.7	37	37.3		36.5
8	8 min	34.3	36.7	36.9	37.4		36.2			8	8 min	38.2	36.8	37	37.3		36.8
9	9 min	34.3	36.7	36.9	37.4		36.2			9	9 min	38.3	36.6	37	37.3		36.9
10	10 min	34.3	36.7	37	37.4		36.2			10	10 min	38.1	36.7	37	37.3		36.7
	AVG	34.4455	36.6	36.7727	37.4		36.3455				AVG	38.0636	36.7727	37	37.3		36.6636
	SD	0.121356	0.109545	0.155505	7.45224e-15		0.121356				SD	0.128629	0.110371	0	7.45224e-15		0.128629
Step 2: Validation during activity
measurement no.	Time	Activity	Cosinuss	CORTES2	Ta	HE	Zephyr
0	0 min	Sitting	36.2	36.1	27.2	0.52	37.4
1	1 min	Sitting	36.3	36.4	27.4	0.525	37.3
2	2 min	Sitting	36.5	36.6	27.6	0.53	37.3			2nd measurement used for induvidual calibration
3	3 min	Walk	36.5	36.9	28	0.527	37.4			9th measurement used for statistical analysis
4	4 min	Walk	36.5	36.7	28.2	0.5273	37.4			Calculation
5	5 min	Jump	36.5	36.8	28.1	0.527	37.4			Check
6	6 min	Jump	36.5	36.9	28.3	0.536	37.4			Missing value

## Sheet: Subject 10
Subject number	10						CF person										CF person
							0.9										0.9
Step 1: Validation measuremetn in rest - Cosinuss										Step 1b: Validation measurement in rest - CORTES2
measurement no.	Time	Cosinuss	Braun	Gallium	Zephyr	Remarks	Calibrated			measurement no.	Time	CORTES2	Braun	Gallium	Zephyr	Remarks	Calibrated
0	0 min	35.7	36.7	36.7	36.9	Left ear	36.6			0	0 min	35.8	36.9	37	36.2	Left ear	36.7
1	1 min	35.8	36.7	36.7	36.8		36.7	TRUE		1	1 min	35.9	36.8	36.9	36.2		36.8	TRUE
2	2 min	35.8	36.7	36.7	36.7		36.7			2	2 min	35.9	36.8	36.9	36.2		36.8
3	3 min	35.8	36.8	36.8	36.6		36.7			3	3 min	35.9	36.7	37	36.2		36.8
4	4 min	35.9	36.7	36.8	36.6		36.8			4	4 min	36.1	36.7	36.9	36.2		37
5	5 min	35.8	36.6	36.8	36.5		36.7			5	5 min	36.1	36.7	37	36.3		37
6	6 min	35.9	36.7	36.8	36.5		36.8			6	6 min	36.1	36.8	37	36.3		37
7	7 min	35.8	36.7	36.9	36.6		36.7			7	7 min	36	36.7	37	36.3		36.9
8	8 min	35.9	36.7	36.9	36.6		36.8			8	8 min	36.1	36.8	37	36.4		37
9	9 min	35.9	36.7	36.9	36.6		36.8			9	9 min	36.1	36.7	37	36.4		37
10	10 min	36	36.7	36.9	36.6		36.9			10	10 min	36.1	36.7	37	36.4		37
	AVG	35.8455	36.7	36.8091	36.6364		36.7455				AVG	36.0091	36.7545	36.9727	36.2818		36.9091
	SD	0.08202	0.0447214	0.0831209	0.120605		0.08202				SD	0.113618	0.0687552	0.0467099	0.0873863		0.113618
Step 2: Validation during activity
measurement no.	Time	Activity	Cosinuss	CORTES2	Ta	HE	Zephyr
0	0 min	Sitting	36.4	37.6	27.8	0.465	36.4
1	1 min	Sitting	36.4	37.9	27.9	0.456	36.5
2	2 min	Sitting	36.4	38.1	28.1	0.458	36.5			2nd measurement used for induvidual calibration
3	3 min	Walk	36.4	38.35	28.27	0.4762	36.5			9th measurement used for statistical analysis
4	4 min	Walk	36.3	38.5	28.4	0.475	36.5			Calculation
5	5 min	Jump	36.3	38.5	28.5	0.49	36.6			Check
6	6 min	Jump	36.1	38.4	28.5	0.5	36.6			Missing value

[truncated: 5 more sheets: Subject 11, Subject 12, Subject 13, Subject 14, Subject 15]
