# Supplementary material for: Evaluation of a Wearable Non-Invasive Thermometer for Monitoring Ear Canal Temperature during Physically Demanding (Outdoor) Work
Source: Int J Environ Res Public Health. 2021 May 4;18(9):4896. doi: 10.3390/ijerph18094896 (PMC8125248; doi:10.3390/ijerph18094896)
Supplement: Supplementary file 1 [file ijerph-18-04896-s001.zip › Supporting Information files/Lab study/Lab study - validation - Bland-Altmann plots.xlsx]

## Sheet: Lab Cosinuss C-med
Mean temperature	Difference Cosinuss versus tympanic IR	Mean difference	LoA +	LoA -	zero-line	LoA
34.775	0.45	-0.431197	-0.051329	-0.811064	0	0.379868
35.1	-0.2	-0.431197	-0.051329	-0.811064	0
35.275	-0.55	-0.431197	-0.051329	-0.811064	0
35.6	-0.4	-0.431197	-0.051329	-0.811064	0
35.5	0	-0.431197	-0.051329	-0.811064	0
35.95	-0.9	-0.431197	-0.051329	-0.811064	0
36.225	-0.45	-0.431197	-0.051329	-0.811064	0
36.2	-0.4	-0.431197	-0.051329	-0.811064	0
36.2167	-0.433333	-0.431197	-0.051329	-0.811064	0
36.6	-0.6	-0.431197	-0.051329	-0.811064	0
36.85	-0.7	-0.431197	-0.051329	-0.811064	0
36.8	-0.6	-0.431197	-0.051329	-0.811064	0
36.95	0.1	-0.431197	-0.051329	-0.811064	0
37.2833	-0.566667	-0.431197	-0.051329	-0.811064	0
36.85	0.3	-0.431197	-0.051329	-0.811064	0
37.75	-0.5	-0.431197	-0.051329	-0.811064	0
37.8	-0.6	-0.431197	-0.051329	-0.811064	0
37.8	-0.6	-0.431197	-0.051329	-0.811064	0
38.35	-0.7	-0.431197	-0.051329	-0.811064	0
38.35	-0.7	-0.431197	-0.051329	-0.811064	0
38.15	-0.7	-0.431197	-0.051329	-0.811064	0
38.6667	-0.333333	-0.431197	-0.051329	-0.811064	0
38.7833	-0.566667	-0.431197	-0.051329	-0.811064	0
38.5667	-0.533333	-0.431197	-0.051329	-0.811064	0
39.1667	-0.333333	-0.431197	-0.051329	-0.811064	0
39.3	-0.6	-0.431197	-0.051329	-0.811064	0
39.0167	-0.0333333	-0.431197	-0.051329	-0.811064	0
39.75	-0.5	-0.431197	-0.051329	-0.811064	0
39.75	-0.7	-0.431197	-0.051329	-0.811064	0
39.7	-0.6	-0.431197	-0.051329	-0.811064	0
40.1333	-0.266667	-0.431197	-0.051329	-0.811064	0
40.25	-0.5	-0.431197	-0.051329	-0.811064	0
40.2	-0.4	-0.431197	-0.051329	-0.811064	0
40.85	-0.3	-0.431197	-0.051329	-0.811064	0
40.75	-0.5	-0.431197	-0.051329	-0.811064	0
40.75	-0.5	-0.431197	-0.051329	-0.811064	0
41.15	-0.3	-0.431197	-0.051329	-0.811064	0
41.3	-0.6	-0.431197	-0.051329	-0.811064	0
41.25	-0.5	-0.431197	-0.051329	-0.811064	0
	-0.431197

## Sheet: Lab tympanic IR
Mean temperature	Difference Cosinuss versus tympanic IR	Mean difference	LoA +	LoA -	zero-line	LoA
35.05	-0.1	-0.161538	0.18205	-0.505126	0	0.343588
35	0	-0.161538	0.18205	-0.505126	0
35	0	-0.161538	0.18205	-0.505126	0
35.6	-0.4	-0.161538	0.18205	-0.505126	0
35.55	-0.1	-0.161538	0.18205	-0.505126	0
35.55	-0.1	-0.161538	0.18205	-0.505126	0
36.15	-0.3	-0.161538	0.18205	-0.505126	0
36.05	-0.1	-0.161538	0.18205	-0.505126	0
36.05	-0.1	-0.161538	0.18205	-0.505126	0
36.55	-0.5	-0.161538	0.18205	-0.505126	0
36.6	-0.2	-0.161538	0.18205	-0.505126	0
36.5	0	-0.161538	0.18205	-0.505126	0
37.1	-0.2	-0.161538	0.18205	-0.505126	0
37.1	-0.2	-0.161538	0.18205	-0.505126	0
37.05	-0.1	-0.161538	0.18205	-0.505126	0
37.6	-0.2	-0.161538	0.18205	-0.505126	0
37.55	-0.1	-0.161538	0.18205	-0.505126	0
37.55	-0.1	-0.161538	0.18205	-0.505126	0
38.1	-0.2	-0.161538	0.18205	-0.505126	0
38.1	-0.2	-0.161538	0.18205	-0.505126	0
37.95	-0.3	-0.161538	0.18205	-0.505126	0
38.6	-0.2	-0.161538	0.18205	-0.505126	0
38.6	-0.2	-0.161538	0.18205	-0.505126	0
38.5	-0.4	-0.161538	0.18205	-0.505126	0
39.05	-0.1	-0.161538	0.18205	-0.505126	0
39	0	-0.161538	0.18205	-0.505126	0
39.05	-0.1	-0.161538	0.18205	-0.505126	0
39.55	-0.1	-0.161538	0.18205	-0.505126	0
39.5	-0.2	-0.161538	0.18205	-0.505126	0
39.45	-0.1	-0.161538	0.18205	-0.505126	0
40.15	-0.3	-0.161538	0.18205	-0.505126	0
40.1	-0.2	-0.161538	0.18205	-0.505126	0
40.15	-0.3	-0.161538	0.18205	-0.505126	0
40.8	-0.2	-0.161538	0.18205	-0.505126	0
40.6	-0.2	-0.161538	0.18205	-0.505126	0
40.65	-0.3	-0.161538	0.18205	-0.505126	0
41.15	-0.3	-0.161538	0.18205	-0.505126	0
41.15	-0.3	-0.161538	0.18205	-0.505126	0
41.15	-0.3	-0.161538	0.18205	-0.505126	0
	-0.161538
