# Supplementary material for: Evaluation of a Wearable Non-Invasive Thermometer for Monitoring Ear Canal Temperature during Physically Demanding (Outdoor) Work
Source: Int J Environ Res Public Health. 2021 May 4;18(9):4896. doi: 10.3390/ijerph18094896 (PMC8125248; doi:10.3390/ijerph18094896)
Supplement: Supplementary file 1 [file ijerph-18-04896-s001.zip › Supporting Information files/Lab study/Lab study - validation - thermostatic water bath RAW.xlsx]

## Sheet: Blad1
T	Mercury	Gallium	IR	Cosinuss
35	35	35.1	35.1	34.55
	35	35.1	35	35.2
	35	35	35	35.55
35.5	35.4	35.4	35.8	35.8
	35.5	35.5	35.6	35.5
	35.5	35.5	35.6	36.4
36	36	35.9	36.3	36.45
	36	36	36.1	36.4
	36	36	36.1	36.4333
36.5	36.3	36.5	36.8	36.9
	36.5	36.6	36.7	37.2
	36.5	36.5	36.5	37.1
37	37	37	37.2	36.9
	37	37	37.2	37.5667
	37	37.1	37.1	36.7
37.5	37.5	37.6	37.7	38
	37.5	37.6	37.6	38.1
	37.5	37.4	37.6	38.1
38	38	38.1	38.2	38.7
	38	38.1	38.2	38.7
	37.8	37.8	38.1	38.5
38.5	38.5	38.5	38.7	38.8333
	38.5	38.4	38.7	39.0667
	38.3	38.2	38.7	38.8333
39	39	39	39.1	39.3333
	39	39	39	39.6
	39	39.1	39.1	39.0333
39.5	39.5	39.4	39.6	40
	39.4	39.3	39.6	40.1
	39.4	39.2	39.5	40
40	40	40	40.3	40.2667
	40	40.1	40.2	40.5
	40	40.2	40.3	40.4
40.5	40.7	40.6	40.9	41
	40.5	40.5	40.7	41
	40.5	40.5	40.8	41
41	41	40.8	41.3	41.3
	41	41	41.3	41.6
	41	41	41.3	41.5
